# Supplementary material for: Electronic Properties of Hexagonal Graphene Quantum Rings from TAO-DFT
Source: MDPI journal article supplement (doi:10.3390/nano12223943), 2022-11-09
Supplement: s1 [file s1]

# Supplementary Information to: Electronic Properties of Hexagonal Graphene Quantum Rings from TAO-DFT

Chi-Chun Chen<sup>1</sup> and Jeng-Da Chai<sup>1,2,3,\*</sup>

<sup>1</sup>*Department of Physics, National Taiwan University, Taipei 10617, Taiwan*

<sup>2</sup>*Center for Theoretical Physics and Center for Quantum Science and Engineering,  
National Taiwan University, Taipei 10617, Taiwan*

<sup>3</sup>*Physics Division, National Center for Theoretical Sciences, Taipei 10617, Taiwan*

Cartesian coordinates for the lowest singlet states of  $n$ -HGQRs ( $n = 3-15$ ), calculated by spin-unrestricted TAO-LDA (S2 to S47).

Cartesian coordinates for the lowest triplet states of  $n$ -HGQRs ( $n = 3-15$ ), calculated by spin-unrestricted TAO-LDA (S48 to S93).

FIG. S1. Singlet-quintet gap of  $n$ -HGQR, calculated by spin-unrestricted TAO-LDA (S94).

TABLE S1. Singlet-triplet gap of  $n$ -HGQR, calculated by spin-unrestricted KS-LDA and TAO-LDA (S94).

TABLE S2. Vertical ionization potential, vertical electron affinity, fundamental gap, and symmetrized von Neumann entropy of ground-state  $n$ -HGQR, calculated by spin-unrestricted TAO-LDA (S95).

---

\* Author to whom correspondence should be addressed. Electronic mail: jdchai@phys.ntu.edu.tw

Cartesian coordinates (in Å) for the lowest singlet states of  $n$ -HGQRs ( $n = 3$ –15), calculated by spin-unrestricted TAO-LDA.

## 3-HGQR (singlet)

|   |             |             |            |
|---|-------------|-------------|------------|
| C | -6.14848528 | -0.68184816 | 0.00000000 |
| C | -6.14848532 | 0.68184808  | 0.00000000 |
| C | -4.90417045 | -2.83169560 | 0.00000000 |
| C | -4.93177990 | -1.43278832 | 0.00000000 |
| C | -4.93177995 | 1.43278833  | 0.00000000 |
| C | -4.90417056 | 2.83169561  | 0.00000000 |
| C | -3.66496130 | -4.98470372 | 0.00000000 |
| C | -3.70680641 | -3.55545297 | 0.00000000 |
| C | -3.69499632 | -0.72289751 | 0.00000000 |
| C | -3.69499631 | 0.72289750  | 0.00000000 |
| C | -3.70680663 | 3.55545296  | 0.00000000 |
| C | -3.66496144 | 4.98470369  | 0.00000000 |
| C | -2.48404937 | -5.66666552 | 0.00000000 |
| C | -2.47364017 | -2.83939036 | 0.00000000 |
| C | -2.51277813 | -1.45128974 | 0.00000000 |
| C | -2.51277820 | 1.45128979  | 0.00000000 |
| C | -2.47364041 | 2.83939039  | 0.00000000 |
| C | -2.48404945 | 5.66666556  | 0.00000000 |
| C | -1.22533924 | -4.98850315 | 0.00000000 |
| C | -1.22170225 | -3.56235090 | 0.00000000 |
| C | -1.22170246 | 3.56235097  | 0.00000000 |
| C | -1.22533922 | 4.98850324  | 0.00000000 |
| C | -0.00000001 | -5.66384240 | 0.00000000 |
| C | 0.00000000  | -2.90237945 | 0.00000000 |
| C | -0.00000002 | 2.90237935  | 0.00000000 |
| C | -0.00000001 | 5.66384238  | 0.00000000 |
| C | 1.22533924  | -4.98850315 | 0.00000000 |
| C | 1.22170226  | -3.56235090 | 0.00000000 |
| C | 1.22170244  | 3.56235096  | 0.00000000 |
| C | 1.22533920  | 4.98850323  | 0.00000000 |
| C | 2.48404937  | -5.66666553 | 0.00000000 |
| C | 2.47364018  | -2.83939036 | 0.00000000 |
| C | 2.51277815  | -1.45128975 | 0.00000000 |
| C | 2.51277820  | 1.45128976  | 0.00000000 |
| C | 2.47364040  | 2.83939036  | 0.00000000 |
| C | 2.48404943  | 5.66666554  | 0.00000000 |
| C | 3.66496131  | -4.98470374 | 0.00000000 |
| C | 3.70680641  | -3.55545298 | 0.00000000 |
| C | 3.69499634  | -0.72289752 | 0.00000000 |
| C | 3.69499632  | 0.72289749  | 0.00000000 |
| C | 3.70680661  | 3.55545295  | 0.00000000 |
| C | 3.66496143  | 4.98470367  | 0.00000000 |
| C | 4.90417046  | -2.83169562 | 0.00000000 |
| C | 4.93177992  | -1.43278834 | 0.00000000 |
| C | 4.93177995  | 1.43278833  | 0.00000000 |
| C | 4.90417056  | 2.83169560  | 0.00000000 |
| C | 6.14848530  | -0.68184815 | 0.00000000 |
| C | 6.14848532  | 0.68184808  | 0.00000000 |
| H | -7.09736725 | -1.23595024 | 0.00000000 |
| H | -7.09736731 | 1.23595014  | 0.00000000 |
| H | -5.85717467 | -3.38178623 | 0.00000000 |
| H | -5.85717483 | 3.38178615  | 0.00000000 |
| H | -4.61926075 | -5.52943853 | 0.00000000 |
| H | -4.61926081 | 5.52943865  | 0.00000000 |
| H | -2.47862582 | -6.76546748 | 0.00000000 |
| H | -2.47862599 | 6.76546754  | 0.00000000 |
| H | -1.56467070 | -0.90452921 | 0.00000000 |
| H | -1.56467068 | 0.90452933  | 0.00000000 |
| H | 0.00000000  | -6.76420128 | 0.00000000 |
| H | -0.00000001 | -1.80792276 | 0.00000000 |
| H | -0.00000003 | 1.80792263  | 0.00000000 |
| H | 0.00000001  | 6.76420125  | 0.00000000 |
| H | 1.56467074  | -0.90452920 | 0.00000000 |
| H | 1.56467070  | 0.90452929  | 0.00000000 |
| H | 2.47862582  | -6.76546749 | 0.00000000 |
| H | 2.47862598  | 6.76546753  | 0.00000000 |
| H | 4.61926076  | -5.52943854 | 0.00000000 |
| H | 4.61926079  | 5.52943863  | 0.00000000 |
| H | 5.85717468  | -3.38178625 | 0.00000000 |
| H | 5.85717482  | 3.38178615  | 0.00000000 |
| H | 7.09736727  | -1.23595023 | 0.00000000 |
| H | 7.09736731  | 1.23595014  | 0.00000000 |

## 4-HGQR (singlet)

|   |             |             |            |
|---|-------------|-------------|------------|
| C | -8.59735933 | -0.67995805 | 0.00000000 |
| C | -8.59735926 | 0.67995902  | 0.00000000 |
| C | -7.38450940 | -2.82689430 | 0.00000000 |
| C | -7.38113439 | -1.43602754 | 0.00000000 |
| C | -7.38113435 | 1.43602829  | 0.00000000 |

|   |             |             |            |
|---|-------------|-------------|------------|
| C | -7.38450931 | 2.82689481  | 0.00000000 |
| C | -6.14031201 | -4.98223851 | 0.00000000 |
| C | -6.19349387 | -3.57611843 | 0.00000000 |
| C | -6.13197078 | -0.72570470 | 0.00000000 |
| C | -6.13197079 | 0.72570545  | 0.00000000 |
| C | -6.19349388 | 3.57611875  | 0.00000000 |
| C | -6.14031195 | 4.98223879  | 0.00000000 |
| C | -4.88749518 | -7.10593705 | 0.00000000 |
| C | -4.93404767 | -5.67456817 | 0.00000000 |
| C | -4.95125308 | -2.85883836 | 0.00000000 |
| C | -4.96068454 | -1.45787206 | 0.00000000 |
| C | -4.96068454 | 1.45787264  | 0.00000000 |
| C | -4.95125316 | 2.85883879  | 0.00000000 |
| C | -4.93404774 | 5.67456833  | 0.00000000 |
| C | -4.88749534 | 7.10593697  | 0.00000000 |
| C | -3.70990012 | -7.78601699 | 0.00000000 |
| C | -3.69433375 | -4.94778840 | 0.00000000 |
| C | -3.74261318 | -3.56722204 | 0.00000000 |
| C | -3.74261341 | 3.56722245  | 0.00000000 |
| C | -3.69433409 | 4.94778857  | 0.00000000 |
| C | -3.70990060 | 7.78601678  | 0.00000000 |
| C | -2.44704249 | -7.11077272 | 0.00000000 |
| C | -2.43756522 | -5.67363797 | 0.00000000 |
| C | -2.43756581 | 5.67363801  | 0.00000000 |
| C | -2.44704321 | 7.11077259  | 0.00000000 |
| C | -1.24431808 | -7.80924122 | 0.00000000 |
| C | -1.21785796 | -5.02537563 | 0.00000000 |
| C | -1.21785881 | 5.02537568  | 0.00000000 |
| C | -1.24431904 | 7.80924113  | 0.00000000 |
| C | 0.00000048  | -7.15237183 | 0.00000000 |
| C | 0.00000047  | -5.71775330 | 0.00000000 |
| C | -0.00000047 | 5.71775332  | 0.00000000 |
| C | -0.00000049 | 7.15237185  | 0.00000000 |
| C | 1.24431904  | -7.80924110 | 0.00000000 |
| C | 1.21785881  | -5.02537565 | 0.00000000 |
| C | 1.21785797  | 5.02537566  | 0.00000000 |
| C | 1.24431807  | 7.80924125  | 0.00000000 |
| C | 2.44704322  | -7.11077257 | 0.00000000 |
| C | 2.43756580  | -5.67363799 | 0.00000000 |
| C | 2.43756523  | 5.67363798  | 0.00000000 |
| C | 2.44704249  | 7.11077274  | 0.00000000 |
| C | 3.70990061  | -7.78601677 | 0.00000000 |
| C | 3.69433409  | -4.94778857 | 0.00000000 |
| C | 3.74261340  | -3.56722245 | 0.00000000 |
| C | 3.74261319  | 3.56722204  | 0.00000000 |
| C | 3.69433375  | 4.94778840  | 0.00000000 |
| C | 3.70990012  | 7.78601699  | 0.00000000 |
| C | 4.88749536  | -7.10593698 | 0.00000000 |
| C | 4.93404774  | -5.67456834 | 0.00000000 |
| C | 4.95125316  | -2.85883880 | 0.00000000 |
| C | 4.96068454  | -1.45787265 | 0.00000000 |
| C | 4.96068453  | 1.45787205  | 0.00000000 |
| C | 4.95125309  | 2.85883835  | 0.00000000 |
| C | 4.93404767  | 5.67456816  | 0.00000000 |
| C | 4.88749517  | 7.10593703  | 0.00000000 |
| C | 6.14031196  | -4.98223880 | 0.00000000 |
| C | 6.19349387  | -3.57611876 | 0.00000000 |
| C | 6.13197079  | -0.72570545 | 0.00000000 |
| C | 6.13197077  | 0.72570470  | 0.00000000 |
| C | 6.19349388  | 3.57611841  | 0.00000000 |
| C | 6.14031200  | 4.98223850  | 0.00000000 |
| C | 7.38450930  | -2.82689482 | 0.00000000 |
| C | 7.38113435  | -1.43602830 | 0.00000000 |
| C | 7.38113440  | 1.43602752  | 0.00000000 |
| C | 7.38450942  | 2.82689428  | 0.00000000 |
| C | 8.59735926  | -0.67995903 | 0.00000000 |
| C | 8.59735934  | 0.67995804  | 0.00000000 |
| H | -9.54558737 | -1.23517423 | 0.00000000 |
| H | -9.54558727 | 1.23517513  | 0.00000000 |
| H | -8.34857090 | -3.35688420 | 0.00000000 |
| H | -8.34857072 | 3.35688480  | 0.00000000 |
| H | -7.08119878 | -5.55241172 | 0.00000000 |
| H | -7.08119868 | 5.55241199  | 0.00000000 |
| H | -5.84248661 | -7.64943087 | 0.00000000 |
| H | -5.84248675 | 7.64943073  | 0.00000000 |
| H | -3.98588399 | -0.95178880 | 0.00000000 |
| H | -3.98588404 | 0.95178931  | 0.00000000 |
| H | -3.70317434 | -8.88480291 | 0.00000000 |
| H | -3.70317484 | 8.88480267  | 0.00000000 |
| H | -2.81692842 | -2.97598936 | 0.00000000 |
| H | -2.81692863 | 2.97598982  | 0.00000000 |
| H | -1.26752800 | -8.90913030 | 0.00000000 |
| H | -1.16898452 | -3.92814743 | 0.00000000 |

|   |             |             |            |
|---|-------------|-------------|------------|
| H | -1.16898528 | 3.92814749  | 0.00000000 |
| H | -1.26752898 | 8.90913017  | 0.00000000 |
| H | 1.26752898  | -8.90913015 | 0.00000000 |
| H | 1.16898529  | -3.92814746 | 0.00000000 |
| H | 1.16898452  | 3.92814745  | 0.00000000 |
| H | 1.26752801  | 8.90913033  | 0.00000000 |
| H | 2.81692863  | -2.97598981 | 0.00000000 |
| H | 2.81692842  | 2.97598936  | 0.00000000 |
| H | 3.70317483  | -8.88480265 | 0.00000000 |
| H | 3.70317437  | 8.88480292  | 0.00000000 |
| H | 3.98588404  | -0.95178933 | 0.00000000 |
| H | 3.98588398  | 0.95178879  | 0.00000000 |
| H | 5.84248676  | -7.64943074 | 0.00000000 |
| H | 5.84248660  | 7.64943084  | 0.00000000 |
| H | 7.08119870  | -5.55241198 | 0.00000000 |
| H | 7.08119876  | 5.55241171  | 0.00000000 |
| H | 8.34857071  | -3.35688481 | 0.00000000 |
| H | 8.34857092  | 3.35688418  | 0.00000000 |
| H | 9.54558726  | -1.23517515 | 0.00000000 |
| H | 9.54558738  | 1.23517422  | 0.00000000 |

## 5-HGQR (singlet)

|   |              |             |            |
|---|--------------|-------------|------------|
| C | -11.04713949 | -0.67967855 | 0.00000000 |
| C | -11.04713939 | 0.67967914  | 0.00000000 |
| C | -9.84124389  | -2.82215311 | 0.00000000 |
| C | -9.83142003  | -1.43571198 | 0.00000000 |
| C | -9.83141982  | 1.43571235  | 0.00000000 |
| C | -9.84124339  | 2.82215355  | 0.00000000 |
| C | -8.63192208  | -4.98378347 | 0.00000000 |
| C | -8.65364324  | -3.58391149 | 0.00000000 |
| C | -8.57624459  | -0.72663603 | 0.00000000 |
| C | -8.57624448  | 0.72663617  | 0.00000000 |
| C | -8.65364261  | 3.58391179  | 0.00000000 |
| C | -8.63192124  | 4.98378370  | 0.00000000 |
| C | -7.36422820  | -7.11139688 | 0.00000000 |
| C | -7.43022049  | -5.70202062 | 0.00000000 |
| C | -7.40102221  | -2.86794294 | 0.00000000 |
| C | -7.41007625  | -1.46159190 | 0.00000000 |
| C | -7.41007592  | 1.46159195  | 0.00000000 |
| C | -7.40102166  | 2.86794311  | 0.00000000 |
| C | -7.43021969  | 5.70202062  | 0.00000000 |
| C | -7.36422737  | 7.11139670  | 0.00000000 |
| C | -6.11166758  | -9.22662573 | 0.00000000 |
| C | -6.15848711  | -7.79573435 | 0.00000000 |
| C | -6.18405390  | -4.97479348 | 0.00000000 |
| C | -6.20453355  | -3.58167311 | 0.00000000 |
| C | -6.20453288  | 3.58167327  | 0.00000000 |
| C | -6.18405321  | 4.97479356  | 0.00000000 |
| C | -6.15848640  | 7.79573394  | 0.00000000 |
| C | -6.11166694  | 9.22662519  | 0.00000000 |
| C | -4.93453074  | -9.90633113 | 0.00000000 |
| C | -4.91693311  | -7.06292515 | 0.00000000 |
| C | -4.97043162  | -5.68538830 | 0.00000000 |
| C | -4.97043108  | 5.68538818  | 0.00000000 |
| C | -4.91693257  | 7.06292474  | 0.00000000 |
| C | -4.93453023  | 9.90633054  | 0.00000000 |
| C | -3.67204209  | -9.23136886 | 0.00000000 |
| C | -3.65848973  | -7.78962833 | 0.00000000 |
| C | -3.65848930  | 7.78962783  | 0.00000000 |
| C | -3.67204170  | 9.23136828  | 0.00000000 |
| C | -2.47642571  | -9.93324522 | 0.00000000 |
| C | -2.43884385  | -7.14729686 | 0.00000000 |
| C | -2.43884356  | 7.14729644  | 0.00000000 |
| C | -2.47642551  | 9.93324465  | 0.00000000 |
| C | -1.22293236  | -9.28571495 | 0.00000000 |
| C | -1.21650750  | -7.84275201 | 0.00000000 |
| C | -1.21650729  | 7.84275156  | 0.00000000 |
| C | -1.22293221  | 9.28571447  | 0.00000000 |
| C | -0.00000003  | -9.96710930 | 0.00000000 |
| C | -0.00000006  | -7.16365156 | 0.00000000 |
| C | 0.00000013   | 7.16365121  | 0.00000000 |
| C | 0.00000007   | 9.96710890  | 0.00000000 |
| C | 1.22293227   | -9.28571491 | 0.00000000 |
| C | 1.21650739   | -7.84275198 | 0.00000000 |
| C | 1.21650750   | 7.84275163  | 0.00000000 |
| C | 1.22293236   | 9.28571453  | 0.00000000 |
| C | 2.47642564   | -9.93324515 | 0.00000000 |
| C | 2.43884372   | -7.14729679 | 0.00000000 |
| C | 2.43884379   | 7.14729656  | 0.00000000 |
| C | 2.47642564   | 9.93324477  | 0.00000000 |
| C | 3.67204199   | -9.23136876 | 0.00000000 |
| C | 3.65848961   | -7.78962822 | 0.00000000 |
| C | 3.65848949   | 7.78962800  | 0.00000000 |
| C | 3.67204185   | 9.23136844  | 0.00000000 |

|   |              |              |            |
|---|--------------|--------------|------------|
| C | 4.93453065   | -9.90633101  | 0.00000000 |
| C | 4.91693297   | -7.06292502  | 0.00000000 |
| C | 4.97043148   | -5.68538816  | 0.00000000 |
| C | 4.97043122   | 5.68538838   | 0.00000000 |
| C | 4.91693275   | 7.06292493   | 0.00000000 |
| C | 4.93453038   | 9.90633072   | 0.00000000 |
| C | 6.11166748   | -9.22662559  | 0.00000000 |
| C | 6.15848698   | -7.79573421  | 0.00000000 |
| C | 6.18405376   | -4.97479334  | 0.00000000 |
| C | 6.20453341   | -3.58167296  | 0.00000000 |
| C | 6.20453295   | 3.58167345   | 0.00000000 |
| C | 6.18405333   | 4.97479374   | 0.00000000 |
| C | 6.15848658   | 7.79573413   | 0.00000000 |
| C | 6.11166709   | 9.22662537   | 0.00000000 |
| C | 7.36422807   | -7.11139674  | 0.00000000 |
| C | 7.43022034   | -5.70202048  | 0.00000000 |
| C | 7.40102209   | -2.86794280  | 0.00000000 |
| C | 7.41007615   | -1.46159176  | 0.00000000 |
| C | 7.41007590   | 1.46159211   | 0.00000000 |
| C | 7.40102170   | 2.86794327   | 0.00000000 |
| C | 7.43021982   | 5.70202078   | 0.00000000 |
| C | 7.36422754   | 7.11139687   | 0.00000000 |
| C | 8.63192194   | -4.98378336  | 0.00000000 |
| C | 8.65364310   | -3.58391137  | 0.00000000 |
| C | 8.57624451   | -0.72663591  | 0.00000000 |
| C | 8.57624444   | 0.72663629   | 0.00000000 |
| C | 8.65364267   | 3.58391192   | 0.00000000 |
| C | 8.63192136   | 4.98378383   | 0.00000000 |
| C | 9.84124377   | -2.82215301  | 0.00000000 |
| C | 9.83141993   | -1.43571188  | 0.00000000 |
| C | 9.83141980   | 1.43571243   | 0.00000000 |
| C | 9.84124342   | 2.82215363   | 0.00000000 |
| C | 11.04713942  | -0.67967849  | 0.00000000 |
| C | 11.04713936  | 0.67967920   | 0.00000000 |
| H | -11.99493458 | -1.23568456  | 0.00000000 |
| H | -11.99493439 | 1.23568529   | 0.00000000 |
| H | -10.80795392 | -3.34744521  | 0.00000000 |
| H | -10.80795331 | 3.34744580   | 0.00000000 |
| H | -9.58436768  | -5.53419846  | 0.00000000 |
| H | -9.58436676  | 5.53419874   | 0.00000000 |
| H | -8.30233310  | -7.68626555  | 0.00000000 |
| H | -8.30233223  | 7.68626539   | 0.00000000 |
| H | -7.06711137  | -9.76936679  | 0.00000000 |
| H | -7.06711071  | 9.76936621   | 0.00000000 |
| H | -6.43357620  | -0.95839386  | 0.00000000 |
| H | -6.43357596  | 0.95839377   | 0.00000000 |
| H | -5.25188857  | -3.03118569  | 0.00000000 |
| H | -5.25188798  | 3.03118576   | 0.00000000 |
| H | -4.92680005  | -11.00513202 | 0.00000000 |
| H | -4.92679953  | 11.00513139  | 0.00000000 |
| H | -4.04650284  | -5.09110099  | 0.00000000 |
| H | -4.04650238  | 5.09110085   | 0.00000000 |
| H | -2.50505656  | -11.03307755 | 0.00000000 |
| H | -2.38637661  | -6.05004925  | 0.00000000 |
| H | -2.38637633  | 6.05004890   | 0.00000000 |
| H | -2.50505638  | 11.03307694  | 0.00000000 |
| H | -0.00000001  | -11.06713884 | 0.00000000 |
| H | -0.00000008  | -6.06343228  | 0.00000000 |
| H | 0.00000016   | 6.06343202   | 0.00000000 |
| H | 0.00000004   | 11.06713839  | 0.00000000 |
| H | 2.50505653   | -11.03307748 | 0.00000000 |
| H | 2.38637644   | -6.05004917  | 0.00000000 |
| H | 2.38637661   | 6.05004902   | 0.00000000 |
| H | 2.50505647   | 11.03307705  | 0.00000000 |
| H | 4.04650269   | -5.09110086  | 0.00000000 |
| H | 4.04650251   | 5.09110107   | 0.00000000 |
| H | 4.92679998   | -11.00513190 | 0.00000000 |
| H | 4.92679966   | 11.00513156  | 0.00000000 |
| H | 5.25188844   | -3.03118554  | 0.00000000 |
| H | 5.25188803   | 3.03118598   | 0.00000000 |
| H | 6.43357611   | -0.95839371  | 0.00000000 |
| H | 6.43357592   | 0.95839397   | 0.00000000 |
| H | 7.06711128   | -9.76936663  | 0.00000000 |
| H | 7.06711086   | 9.76936641   | 0.00000000 |
| H | 8.30233298   | -7.68626540  | 0.00000000 |
| H | 8.30233240   | 7.68626554   | 0.00000000 |
| H | 9.58436753   | -5.53419835  | 0.00000000 |
| H | 9.58436690   | 5.53419884   | 0.00000000 |
| H | 10.80795379  | -3.34744512  | 0.00000000 |
| H | 10.80795336  | 3.34744585   | 0.00000000 |
| H | 11.99493450  | -1.23568454  | 0.00000000 |
| H | 11.99493437  | 1.23568533   | 0.00000000 |

6-HGQR (singlet)

|   |              |              |            |
|---|--------------|--------------|------------|
| C | -13.49724507 | -0.67987993  | 0.00000000 |
| C | -13.49724493 | 0.67988116   | 0.00000000 |
| C | -12.29497003 | -2.81979264  | 0.00000000 |
| C | -12.28226189 | -1.43467990  | 0.00000000 |
| C | -12.28226158 | 1.43468085   | 0.00000000 |
| C | -12.29496947 | 2.81979354   | 0.00000000 |
| C | -11.09568159 | -4.98131804  | 0.00000000 |
| C | -11.10916821 | -3.58538969  | 0.00000000 |
| C | -11.02394811 | -0.72648150  | 0.00000000 |
| C | -11.02394795 | 0.72648219   | 0.00000000 |
| C | -11.10916751 | 3.58539028   | 0.00000000 |
| C | -11.09568070 | 4.98131855   | 0.00000000 |
| C | -9.86147147  | -7.11738630  | 0.00000000 |
| C | -9.89720732  | -5.71341967  | 0.00000000 |
| C | -9.85185774  | -2.87235649  | 0.00000000 |
| C | -9.85960502  | -1.46419943  | 0.00000000 |
| C | -9.85960470  | 1.46419983   | 0.00000000 |
| C | -9.85185717  | 2.87235684   | 0.00000000 |
| C | -9.89720633  | 5.71341985   | 0.00000000 |
| C | -9.86147034  | 7.11738638   | 0.00000000 |
| C | -8.58841856  | -9.23584067  | 0.00000000 |
| C | -8.65888863  | -7.82615086  | 0.00000000 |
| C | -8.64137593  | -4.98782581  | 0.00000000 |
| C | -8.66051270  | -3.58933337  | 0.00000000 |
| C | -8.66051200  | 3.58933341   | 0.00000000 |
| C | -8.64137503  | 4.98782577   | 0.00000000 |
| C | -8.65888742  | 7.82615061   | 0.00000000 |
| C | -8.58841728  | 9.23584031   | 0.00000000 |
| C | -7.33603880  | -11.34638678 | 0.00000000 |
| C | -7.38227047  | -9.91676653  | 0.00000000 |
| C | -7.41310758  | -7.09307960  | 0.00000000 |
| C | -7.43935811  | -5.70278063  | 0.00000000 |
| C | -7.43935712  | 5.70278028   | 0.00000000 |
| C | -7.41310646  | 7.09307917   | 0.00000000 |
| C | -7.38226918  | 9.91676588   | 0.00000000 |
| C | -7.33603742  | 11.34638608  | 0.00000000 |
| C | -6.15849582  | -12.02614535 | 0.00000000 |
| C | -6.14001892  | -9.18056339  | 0.00000000 |
| C | -6.19710608  | -7.80321729  | 0.00000000 |
| C | -6.19710489  | 7.80321659   | 0.00000000 |
| C | -6.14001773  | 9.18056258   | 0.00000000 |
| C | -6.15849459  | 12.02614448  | 0.00000000 |
| C | -4.89755442  | -11.35101505 | 0.00000000 |
| C | -4.88174463  | -9.90697445  | 0.00000000 |
| C | -4.88174350  | 9.90697352   | 0.00000000 |
| C | -4.89755330  | 11.35101411  | 0.00000000 |
| C | -3.70454377  | -12.05469268 | 0.00000000 |
| C | -3.66059360  | -9.26759594  | 0.00000000 |
| C | -3.66059267  | 9.26759492   | 0.00000000 |
| C | -3.70454289  | 12.05469179  | 0.00000000 |
| C | -2.44866211  | -11.41062695 | 0.00000000 |
| C | -2.43731144  | -9.96507793  | 0.00000000 |
| C | -2.43731068  | 9.96507696   | 0.00000000 |
| C | -2.44866141  | 11.41062602  | 0.00000000 |
| C | -1.23337786  | -12.09730551 | 0.00000000 |
| C | -1.22045789  | -9.29218592  | 0.00000000 |
| C | -1.22045732  | 9.29218493   | 0.00000000 |
| C | -1.23337743  | 12.09730469  | 0.00000000 |
| C | -0.00000071  | -11.42580027 | 0.00000000 |
| C | -0.00000062  | -9.97525101  | 0.00000000 |
| C | -0.00000031  | 9.97525016   | 0.00000000 |
| C | -0.00000049  | 11.42579945  | 0.00000000 |
| C | 1.23337639   | -12.09730573 | 0.00000000 |
| C | 1.22045677   | -9.29218605  | 0.00000000 |
| C | 1.22045689   | 9.29218522   | 0.00000000 |
| C | 1.23337633   | 12.09730508  | 0.00000000 |
| C | 2.44866083   | -11.41062737 | 0.00000000 |
| C | 2.43731035   | -9.96507822  | 0.00000000 |
| C | 2.43731019   | 9.96507757   | 0.00000000 |
| C | 2.44866059   | 11.41062675  | 0.00000000 |
| C | 3.70454253   | -12.05469337 | 0.00000000 |
| C | 3.66059276   | -9.26759639  | 0.00000000 |
| C | 3.66059247   | 9.26759582   | 0.00000000 |
| C | 3.70454203   | 12.05469293  | 0.00000000 |
| C | 4.89755341   | -11.35101584 | 0.00000000 |
| C | 4.88174387   | -9.90697512  | 0.00000000 |
| C | 4.88174331   | 9.90697477   | 0.00000000 |
| C | 4.89755276   | 11.35101547  | 0.00000000 |
| C | 6.15849491   | -12.02614630 | 0.00000000 |
| C | 6.14001837   | -9.18056416  | 0.00000000 |
| C | 6.19710565   | -7.80321780  | 0.00000000 |
| C | 6.19710503   | 7.80321775   | 0.00000000 |
| C | 6.14001777   | 9.18056399   | 0.00000000 |

|   |              |              |            |
|---|--------------|--------------|------------|
| C | 6.15849412   | 12.02614605  | 0.00000000 |
| C | 7.33603810   | -11.34638778 | 0.00000000 |
| C | 7.38227005   | -9.91676738  | 0.00000000 |
| C | 7.41310737   | -7.09308004  | 0.00000000 |
| C | 7.43935803   | -5.70278082  | 0.00000000 |
| C | 7.43935752   | 5.70278113   | 0.00000000 |
| C | 7.41310679   | 7.09308025   | 0.00000000 |
| C | 7.38226933   | 9.91676739   | 0.00000000 |
| C | 7.33603721   | 11.34638774  | 0.00000000 |
| C | 8.58841830   | -9.23584147  | 0.00000000 |
| C | 8.65888850   | -7.82615154  | 0.00000000 |
| C | 8.64137605   | -4.98782589  | 0.00000000 |
| C | 8.66051310   | -3.58933323  | 0.00000000 |
| C | 8.66051273   | 3.58933387   | 0.00000000 |
| C | 8.64137560   | 4.98782646   | 0.00000000 |
| C | 8.65888786   | 7.82615191   | 0.00000000 |
| C | 8.58841760   | 9.23584175   | 0.00000000 |
| C | 9.86147154   | -7.11738684  | 0.00000000 |
| C | 9.89720755   | -5.71341997  | 0.00000000 |
| C | 9.85185840   | -2.87235629  | 0.00000000 |
| C | 9.85960597   | -1.46419912  | 0.00000000 |
| C | 9.85960581   | 1.46420003   | 0.00000000 |
| C | 9.85185810   | 2.87235716   | 0.00000000 |
| C | 9.89720703   | 5.71342068   | 0.00000000 |
| C | 9.86147096   | 7.11738746   | 0.00000000 |
| C | 11.09568204  | -4.98131822  | 0.00000000 |
| C | 11.10916887  | -3.58538965  | 0.00000000 |
| C | 11.02394923  | -0.72648127  | 0.00000000 |
| C | 11.02394915  | 0.72648235   | 0.00000000 |
| C | 11.10916850  | 3.58539065   | 0.00000000 |
| C | 11.09568160  | 4.98131916   | 0.00000000 |
| C | 12.29497083  | -2.81979259  | 0.00000000 |
| C | 12.28226286  | -1.43467974  | 0.00000000 |
| C | 12.28226269  | 1.43468097   | 0.00000000 |
| C | 12.29497054  | 2.81979379   | 0.00000000 |
| C | 13.49724610  | -0.67987991  | 0.00000000 |
| C | 13.49724602  | 0.67988131   | 0.00000000 |
| H | -14.44473587 | -1.23637480  | 0.00000000 |
| H | -14.44473560 | 1.23637627   | 0.00000000 |
| H | -13.26276810 | -3.34311139  | 0.00000000 |
| H | -13.26276745 | 3.34311249   | 0.00000000 |
| H | -12.05144440 | -5.52599823  | 0.00000000 |
| H | -12.05144343 | 5.52599892   | 0.00000000 |
| H | -10.81047170 | -7.67376463  | 0.00000000 |
| H | -10.81047051 | 7.67376488   | 0.00000000 |
| H | -9.52527196  | -9.81277332  | 0.00000000 |
| H | -9.52527061  | 9.81277311   | 0.00000000 |
| H | -8.88229912  | -0.96227707  | 0.00000000 |
| H | -8.88229889  | 0.96227729   | 0.00000000 |
| H | -8.29171086  | -11.88869067 | 0.00000000 |
| H | -8.29170940  | 11.88869014  | 0.00000000 |
| H | -7.70536874  | -3.04339794  | 0.00000000 |
| H | -7.70536812  | 3.04339781   | 0.00000000 |
| H | -6.48956306  | -5.14761833  | 0.00000000 |
| H | -6.48956211  | 5.14761784   | 0.00000000 |
| H | -6.15002955  | -13.12492337 | 0.00000000 |
| H | -6.15002836  | 13.12492253  | 0.00000000 |
| H | -5.27400782  | -7.20740043  | 0.00000000 |
| H | -5.27400660  | 7.20739970   | 0.00000000 |
| H | -3.73539553  | -13.15448127 | 0.00000000 |
| H | -3.60656866  | -8.17029107  | 0.00000000 |
| H | -3.60656779  | 8.17029000   | 0.00000000 |
| H | -3.73539469  | 13.15448042  | 0.00000000 |
| H | -1.24012992  | -13.19733572 | 0.00000000 |
| H | -1.21505452  | -8.19207865  | 0.00000000 |
| H | -1.21505391  | 8.19207761   | 0.00000000 |
| H | -1.24012953  | 13.19733496  | 0.00000000 |
| H | 1.24012843   | -13.19733597 | 0.00000000 |
| H | 1.21505368   | -8.19207874  | 0.00000000 |
| H | 1.21505390   | 8.19207786   | 0.00000000 |
| H | 1.24012826   | 13.19733537  | 0.00000000 |
| H | 3.73539417   | -13.15448204 | 0.00000000 |
| H | 3.60656804   | -8.17029142  | 0.00000000 |
| H | 3.60656792   | 8.17029079   | 0.00000000 |
| H | 3.73539360   | 13.15448164  | 0.00000000 |
| H | 5.27400733   | -7.20740084  | 0.00000000 |
| H | 5.27400667   | 7.20740077   | 0.00000000 |
| H | 6.15002852   | -13.12492439 | 0.00000000 |
| H | 6.15002771   | 13.12492417  | 0.00000000 |
| H | 6.48956288   | -5.14761849  | 0.00000000 |
| H | 6.48956240   | 5.14761869   | 0.00000000 |
| H | 7.70536906   | -3.04339776  | 0.00000000 |
| H | 7.70536872   | 3.04339831   | 0.00000000 |

|   |             |              |            |
|---|-------------|--------------|------------|
| H | 8.29171011  | -11.88869187 | 0.00000000 |
| H | 8.29170911  | 11.88869205  | 0.00000000 |
| H | 8.88229998  | -0.96227676  | 0.00000000 |
| H | 8.88229985  | 0.96227758   | 0.00000000 |
| H | 9.52527177  | -9.81277416  | 0.00000000 |
| H | 9.52527099  | 9.81277459   | 0.00000000 |
| H | 10.81047190 | -7.67376521  | 0.00000000 |
| H | 10.81047127 | 7.67376594   | 0.00000000 |
| H | 12.05144486 | -5.52599867  | 0.00000000 |
| H | 12.05144436 | 5.52599972   | 0.00000000 |
| H | 13.26276884 | -3.34311163  | 0.00000000 |
| H | 13.26276849 | 3.34311293   | 0.00000000 |
| H | 14.44473687 | -1.23637492  | 0.00000000 |
| H | 14.44473672 | 1.23637646   | 0.00000000 |

## 7-HGQR (singlet)

|   |              |              |            |
|---|--------------|--------------|------------|
| C | -15.94896156 | -0.68016314  | 0.00000000 |
| C | -15.94896165 | 0.68016680   | 0.00000000 |
| C | -14.74821230 | -2.81859804  | 0.00000000 |
| C | -14.73439156 | -1.43324917  | 0.00000000 |
| C | -14.73439189 | 1.43325293   | 0.00000000 |
| C | -14.74821307 | 2.81860110   | 0.00000000 |
| C | -13.55477788 | -4.98024091  | 0.00000000 |
| C | -13.56407941 | -3.58509088  | 0.00000000 |
| C | -13.47500100 | -0.72597768  | 0.00000000 |
| C | -13.47500124 | 0.72598192   | 0.00000000 |
| C | -13.56408093 | 3.58509371   | 0.00000000 |
| C | -13.55478032 | 4.98024258   | 0.00000000 |
| C | -12.33075353 | -7.11771023  | 0.00000000 |
| C | -12.35845908 | -5.71725052  | 0.00000000 |
| C | -12.30436339 | -2.87430028  | 0.00000000 |
| C | -12.31079989 | -1.46623584  | 0.00000000 |
| C | -12.31080064 | 1.46623999   | 0.00000000 |
| C | -12.30436509 | 2.87430381   | 0.00000000 |
| C | -12.35846260 | 5.71725165   | 0.00000000 |
| C | -12.33075817 | 7.11771003   | 0.00000000 |
| C | -11.08957462 | -9.24509533  | 0.00000000 |
| C | -11.13104166 | -7.84058643  | 0.00000000 |
| C | -11.09830335 | -4.99513703  | 0.00000000 |
| C | -11.11506047 | -3.59497145  | 0.00000000 |
| C | -11.11506310 | 3.59497450   | 0.00000000 |
| C | -11.09830714 | 4.99513900   | 0.00000000 |
| C | -11.13104753 | 7.84058567   | 0.00000000 |
| C | -11.08958162 | 9.24509347   | 0.00000000 |
| C | -9.81297160  | -11.35807788 | 0.00000000 |
| C | -9.88536269  | -9.94942838  | 0.00000000 |
| C | -9.87632889  | -7.10905491  | 0.00000000 |
| C | -9.90146731  | -5.71339228  | 0.00000000 |
| C | -9.90147212  | 5.71339355   | 0.00000000 |
| C | -9.87633497  | 7.10905499   | 0.00000000 |
| C | -9.88537081  | 9.94942632   | 0.00000000 |
| C | -9.81298074  | 11.35807532  | 0.00000000 |
| C | -8.56080871  | -13.46625781 | 0.00000000 |
| C | -8.60592611  | -12.03786629 | 0.00000000 |
| C | -8.64052459  | -9.21279916  | 0.00000000 |
| C | -8.67142560  | -7.82241096  | 0.00000000 |
| C | -8.67143259  | 7.82241056   | 0.00000000 |
| C | -8.64053269  | 9.21279786   | 0.00000000 |
| C | -8.60593603  | 12.03786420  | 0.00000000 |
| C | -8.56081935  | 13.46625586  | 0.00000000 |
| C | -7.38269033  | -14.14610795 | 0.00000000 |
| C | -7.36408367  | -11.29999221 | 0.00000000 |
| C | -7.42376825  | -9.92149249  | 0.00000000 |
| C | -7.42377685  | 9.92149120   | 0.00000000 |
| C | -7.36409316  | 11.29999078  | 0.00000000 |
| C | -7.38270107  | 14.14610696  | 0.00000000 |
| C | -6.12357705  | -13.47024125 | 0.00000000 |
| C | -6.10655305  | -12.02571484 | 0.00000000 |
| C | -6.10656263  | 12.02571403  | 0.00000000 |
| C | -6.12358691  | 13.47024090  | 0.00000000 |
| C | -4.93089558  | -14.17490634 | 0.00000000 |
| C | -4.88328925  | -11.38764879 | 0.00000000 |
| C | -4.88329750  | 11.38764822  | 0.00000000 |
| C | -4.93090444  | 14.17490692  | 0.00000000 |
| C | -3.67514003  | -13.53265020 | 0.00000000 |
| C | -3.66067057  | -12.08614146 | 0.00000000 |
| C | -3.66067769  | 12.08614112  | 0.00000000 |
| C | -3.67514739  | 13.53265080  | 0.00000000 |
| C | -2.46269187  | -14.22260841 | 0.00000000 |
| C | -2.44159048  | -11.41689480 | 0.00000000 |
| C | -2.44159565  | 11.41689431  | 0.00000000 |
| C | -2.46269729  | 14.22260957  | 0.00000000 |
| C | -1.22615625  | -13.55546103 | 0.00000000 |
| C | -1.22087383  | -12.10290731 | 0.00000000 |

|   |              |              |            |
|---|--------------|--------------|------------|
| C | -1.22087707  | 12.10290709  | 0.00000000 |
| C | -1.22615954  | 13.55546199  | 0.00000000 |
| C | 0.00000047   | -14.23236250 | 0.00000000 |
| C | 0.00000031   | -11.42618424 | 0.00000000 |
| C | -0.00000070  | 11.42618380  | 0.00000000 |
| C | -0.00000050  | 14.23236386  | 0.00000000 |
| C | 1.22615716   | -13.55546097 | 0.00000000 |
| C | 1.22087457   | -12.10290721 | 0.00000000 |
| C | 1.22087582   | 12.10290697  | 0.00000000 |
| C | 1.22615852   | 13.55546191  | 0.00000000 |
| C | 2.46269287   | -14.22260817 | 0.00000000 |
| C | 2.44159137   | -11.41689461 | 0.00000000 |
| C | 2.44159455   | 11.41689403  | 0.00000000 |
| C | 2.46269639   | 14.22260930  | 0.00000000 |
| C | 3.67514101   | -13.53265001 | 0.00000000 |
| C | 3.66067160   | -12.08614133 | 0.00000000 |
| C | 3.66067680   | 12.08614088  | 0.00000000 |
| C | 3.67514649   | 13.53265054  | 0.00000000 |
| C | 4.93089649   | -14.17490606 | 0.00000000 |
| C | 4.88329024   | -11.38764868 | 0.00000000 |
| C | 4.88329665   | 11.38764794  | 0.00000000 |
| C | 4.93090354   | 14.17490657  | 0.00000000 |
| C | 6.12357790   | -13.47024101 | 0.00000000 |
| C | 6.10655395   | -12.02571469 | 0.00000000 |
| C | 6.10656181   | 12.02571370  | 0.00000000 |
| C | 6.12358602   | 13.47024056  | 0.00000000 |
| C | 7.38269103   | -14.14610776 | 0.00000000 |
| C | 7.36408443   | -11.29999216 | 0.00000000 |
| C | 7.42376899   | -9.92149267  | 0.00000000 |
| C | 7.42377612   | 9.92149088   | 0.00000000 |
| C | 7.36409233   | 11.29999047  | 0.00000000 |
| C | 7.38270013   | 14.14610671  | 0.00000000 |
| C | 8.56080932   | -13.46625770 | 0.00000000 |
| C | 8.60592672   | -12.03786623 | 0.00000000 |
| C | 8.64052523   | -9.21279943  | 0.00000000 |
| C | 8.67142621   | -7.82241133  | 0.00000000 |
| C | 8.67143204   | 7.82240990   | 0.00000000 |
| C | 8.64053203   | 9.21279744   | 0.00000000 |
| C | 8.60593519   | 12.03786393  | 0.00000000 |
| C | 8.56081846   | 13.46625563  | 0.00000000 |
| C | 9.81297216   | -11.35807796 | 0.00000000 |
| C | 9.88536329   | -9.94942856  | 0.00000000 |
| C | 9.87632936   | -7.10905526  | 0.00000000 |
| C | 9.90146773   | -5.71339269  | 0.00000000 |
| C | 9.90147179   | 5.71339234   | 0.00000000 |
| C | 9.87633452   | 7.10905406   | 0.00000000 |
| C | 9.88537025   | 9.94942591   | 0.00000000 |
| C | 9.81298006   | 11.35807504  | 0.00000000 |
| C | 11.08957512  | -9.24509546  | 0.00000000 |
| C | 11.13104209  | -7.84058663  | 0.00000000 |
| C | 11.09830374  | -4.99513741  | 0.00000000 |
| C | 11.11506093  | -3.59497180  | 0.00000000 |
| C | 11.11506318  | 3.59497268   | 0.00000000 |
| C | 11.09830702  | 4.99513750   | 0.00000000 |
| C | 11.13104718  | 7.84058472   | 0.00000000 |
| C | 11.08958120  | 9.24509278   | 0.00000000 |
| C | 12.33075386  | -7.11771040  | 0.00000000 |
| C | 12.35845943  | -5.71725079  | 0.00000000 |
| C | 12.30436385  | -2.87430076  | 0.00000000 |
| C | 12.31080028  | -1.46623660  | 0.00000000 |
| C | 12.31080096  | 1.46623823   | 0.00000000 |
| C | 12.30436537  | 2.87430193   | 0.00000000 |
| C | 12.35846257  | 5.71725016   | 0.00000000 |
| C | 12.33075799  | 7.11770880   | 0.00000000 |
| C | 13.55477803  | -4.98024117  | 0.00000000 |
| C | 13.56407961  | -3.58509138  | 0.00000000 |
| C | 13.47500107  | -0.72597879  | 0.00000000 |
| C | 13.47500131  | 0.72598042   | 0.00000000 |
| C | 13.56408107  | 3.58509193   | 0.00000000 |
| C | 13.55478031  | 4.98024086   | 0.00000000 |
| C | 14.74821222  | -2.81859865  | 0.00000000 |
| C | 14.73439138  | -1.43325010  | 0.00000000 |
| C | 14.73439176  | 1.43325127   | 0.00000000 |
| C | 14.74821307  | 2.81859929   | 0.00000000 |
| C | 15.94896127  | -0.68016434  | 0.00000000 |
| C | 15.94896140  | 0.68016533   | 0.00000000 |
| H | -16.89622160 | -1.23705748  | 0.00000000 |
| H | -16.89622179 | 1.23706076   | 0.00000000 |
| H | -15.71658380 | -3.34087380  | 0.00000000 |
| H | -15.71658465 | 3.34087625   | 0.00000000 |
| H | -14.51221801 | -5.52199270  | 0.00000000 |
| H | -14.51222044 | 5.52199370   | 0.00000000 |
| H | -13.28305940 | -7.66843893  | 0.00000000 |

|                  |              |              |            |
|------------------|--------------|--------------|------------|
| H                | -13.28306395 | 7.66843816   | 0.00000000 |
| H                | -12.03671048 | -9.80466412  | 0.00000000 |
| H                | -12.03671741 | 9.80466181   | 0.00000000 |
| H                | -11.33316619 | -0.96479343  | 0.00000000 |
| H                | -11.33316695 | 0.96479766   | 0.00000000 |
| H                | -10.74909003 | -11.93621518 | 0.00000000 |
| H                | -10.74909921 | 11.93621226  | 0.00000000 |
| H                | -10.15843237 | -3.05162121  | 0.00000000 |
| H                | -10.15843502 | 3.05162462   | 0.00000000 |
| H                | -9.51664913  | -14.00826849 | 0.00000000 |
| H                | -9.51665994  | 14.00826627  | 0.00000000 |
| H                | -8.94918470  | -5.16272000  | 0.00000000 |
| H                | -8.94918944  | 5.16272182   | 0.00000000 |
| H                | -7.72330369  | -7.26437522  | 0.00000000 |
| H                | -7.72331040  | 7.26437550   | 0.00000000 |
| H                | -7.37355492  | -15.24488215 | 0.00000000 |
| H                | -7.37356607  | 15.24488145  | 0.00000000 |
| H                | -6.50105803  | -9.32494269  | 0.00000000 |
| H                | -6.50106602  | 9.32494212   | 0.00000000 |
| H                | -4.96284854  | -15.27467181 | 0.00000000 |
| H                | -4.82874788  | -10.29029700 | 0.00000000 |
| H                | -4.82875535  | 10.29029620  | 0.00000000 |
| H                | -4.96285736  | 15.27467288  | 0.00000000 |
| H                | -2.47286046  | -15.32262335 | 0.00000000 |
| H                | -2.43315851  | -10.31679575 | 0.00000000 |
| H                | -2.43316334  | 10.31679475  | 0.00000000 |
| H                | -2.47286575  | 15.32262519  | 0.00000000 |
| H                | 0.00000055   | -15.33242452 | 0.00000000 |
| H                | 0.00000032   | -10.32616894 | 0.00000000 |
| H                | -0.00000069  | 10.32616789  | 0.00000000 |
| H                | -0.00000044  | 15.33242663  | 0.00000000 |
| H                | 2.47286144   | -15.32262308 | 0.00000000 |
| H                | 2.43315931   | -10.31679554 | 0.00000000 |
| H                | 2.43316212   | 10.31679443  | 0.00000000 |
| H                | 2.47286485   | 15.32262489  | 0.00000000 |
| H                | 4.96284945   | -15.27467148 | 0.00000000 |
| H                | 4.82874873   | -10.29029693 | 0.00000000 |
| H                | 4.82875431   | 10.29029592  | 0.00000000 |
| H                | 4.96285648   | 15.27467250  | 0.00000000 |
| H                | 6.50105889   | -9.32494281  | 0.00000000 |
| H                | 6.50106542   | 9.32494164   | 0.00000000 |
| H                | 7.37355554   | -15.24488189 | 0.00000000 |
| H                | 7.37356504   | 15.24488116  | 0.00000000 |
| H                | 7.72330430   | -7.26437573  | 0.00000000 |
| H                | 7.72330982   | 7.26437490   | 0.00000000 |
| H                | 8.94918518   | -5.16272039  | 0.00000000 |
| H                | 8.94918913   | 5.16272055   | 0.00000000 |
| H                | 9.51664970   | -14.00826832 | 0.00000000 |
| H                | 9.51665905   | 14.00826601  | 0.00000000 |
| H                | 10.15843287  | -3.05162155  | 0.00000000 |
| H                | 10.15843508  | 3.05162279   | 0.00000000 |
| H                | 10.74909049  | -11.93621527 | 0.00000000 |
| H                | 10.74909851  | 11.93621198  | 0.00000000 |
| H                | 11.33316655  | -0.96479441  | 0.00000000 |
| H                | 11.33316720  | 0.96479616   | 0.00000000 |
| H                | 12.03671094  | -9.80466416  | 0.00000000 |
| H                | 12.03671701  | 9.80466106   | 0.00000000 |
| H                | 13.28305964  | -7.66843905  | 0.00000000 |
| H                | 13.28306375  | 7.66843693   | 0.00000000 |
| H                | 14.51221801  | -5.52199297  | 0.00000000 |
| H                | 14.51222033  | 5.52199206   | 0.00000000 |
| H                | 15.71658362  | -3.34087431  | 0.00000000 |
| H                | 15.71658457  | 3.34087440   | 0.00000000 |
| H                | 16.89622118  | -1.23705865  | 0.00000000 |
| H                | 16.89622145  | 1.23705926   | 0.00000000 |
| 8-HGQR (singlet) |              |              |            |
| C                | -18.40280923 | -0.68036238  | 0.00000000 |
| C                | -18.40280903 | 0.68037654   | 0.00000000 |
| C                | -17.20243740 | -2.81792732  | 0.00000000 |
| C                | -17.18829051 | -1.43177691  | 0.00000000 |
| C                | -17.18829025 | 1.43179072   | 0.00000000 |
| C                | -17.20243697 | 2.81794043   | 0.00000000 |
| C                | -16.01252498 | -4.97984925  | 0.00000000 |
| C                | -16.01971974 | -3.58396593  | 0.00000000 |
| C                | -15.92885013 | -0.72544377  | 0.00000000 |
| C                | -15.92885006 | 0.72545768   | 0.00000000 |
| C                | -16.01971978 | 3.58397837   | 0.00000000 |
| C                | -16.01252530 | 4.97986042   | 0.00000000 |
| C                | -14.79503566 | -7.11874851  | 0.00000000 |
| C                | -14.81858793 | -5.71871350  | 0.00000000 |
| C                | -14.75904969 | -2.87505493  | 0.00000000 |
| C                | -14.76414539 | -1.46782490  | 0.00000000 |
| C                | -14.76414558 | 1.46783827   | 0.00000000 |

|   |              |              |            |
|---|--------------|--------------|------------|
| C | -14.75905028 | 2.87506767   | 0.00000000 |
| C | -14.81858916 | 5.71872358   | 0.00000000 |
| C | -14.79503740 | 7.11875693   | 0.00000000 |
| C | -13.56361116 | -9.24803844  | 0.00000000 |
| C | -13.59758798 | -7.84693277  | 0.00000000 |
| C | -13.55599334 | -4.99937706  | 0.00000000 |
| C | -13.57042468 | -3.59957667  | 0.00000000 |
| C | -13.57042611 | 3.59958853   | 0.00000000 |
| C | -13.55599535 | 4.99938765   | 0.00000000 |
| C | -13.59759091 | 7.84693982   | 0.00000000 |
| C | -13.56361474 | 9.24804374   | 0.00000000 |
| C | -12.31719788 | -11.36989480 | 0.00000000 |
| C | -12.36190615 | -9.96656405  | 0.00000000 |
| C | -12.33876034 | -7.11891742  | 0.00000000 |
| C | -12.36140058 | -5.72174800  | 0.00000000 |
| C | -12.36140370 | 5.72175733   | 0.00000000 |
| C | -12.33876416 | 7.11892508   | 0.00000000 |
| C | -12.36191100 | 9.96656806   | 0.00000000 |
| C | -12.31720330 | 11.36989732  | 0.00000000 |
| C | -11.03801868 | -13.47948921 | 0.00000000 |
| C | -11.11107525 | -12.07233184 | 0.00000000 |
| C | -11.10865353 | -9.23105278  | 0.00000000 |
| C | -11.13905078 | -7.83526787  | 0.00000000 |
| C | -11.13905580 | 7.83527416   | 0.00000000 |
| C | -11.10865925 | 9.23105736   | 0.00000000 |
| C | -11.11108178 | 12.07233327  | 0.00000000 |
| C | -11.03802552 | 13.47948958  | 0.00000000 |
| C | -9.78605011  | -15.58656813 | 0.00000000 |
| C | -9.82996085  | -14.15907114 | 0.00000000 |
| C | -9.86761138  | -11.33355562 | 0.00000000 |
| C | -9.90264877  | -9.94182224  | 0.00000000 |
| C | -9.90265552  | 9.94182564   | 0.00000000 |
| C | -9.86761863  | 11.33355753  | 0.00000000 |
| C | -9.82996867  | 14.15907092  | 0.00000000 |
| C | -9.78605839  | 15.58656735  | 0.00000000 |
| C | -8.60746906  | -16.26639220 | 0.00000000 |
| C | -8.58907195  | -13.42037796 | 0.00000000 |
| C | -8.65070781  | -12.04037602 | 0.00000000 |
| C | -8.65071573  | 12.04037703  | 0.00000000 |
| C | -8.58908039  | 13.42037789  | 0.00000000 |
| C | -8.60747807  | 16.26639136  | 0.00000000 |
| C | -7.34998525  | -15.58946098 | 0.00000000 |
| C | -7.33230827  | -14.14534229 | 0.00000000 |
| C | -7.33231725  | 14.14534210  | 0.00000000 |
| C | -7.34999461  | 15.58946042  | 0.00000000 |
| C | -6.15672016  | -16.29467131 | 0.00000000 |
| C | -6.10699579  | -13.50777266 | 0.00000000 |
| C | -6.10700526  | 13.50777276  | 0.00000000 |
| C | -6.15673005  | 16.29467090  | 0.00000000 |
| C | -4.90215241  | -15.65328147 | 0.00000000 |
| C | -4.88566871  | -14.20688630 | 0.00000000 |
| C | -4.88567860  | 14.20688641  | 0.00000000 |
| C | -4.90216241  | 15.65328139  | 0.00000000 |
| C | -3.69014752  | -16.34540718 | 0.00000000 |
| C | -3.66358112  | -13.54011831 | 0.00000000 |
| C | -3.66359117  | 13.54011858  | 0.00000000 |
| C | -3.69015775  | 16.34540725  | 0.00000000 |
| C | -2.45323651  | -15.68122007 | 0.00000000 |
| C | -2.44430024  | -14.22794008 | 0.00000000 |
| C | -2.44431042  | 14.22794033  | 0.00000000 |
| C | -2.45324673  | 15.68122029  | 0.00000000 |
| C | -1.22963063  | -16.36160840 | 0.00000000 |
| C | -1.22089647  | -13.55530670 | 0.00000000 |
| C | -1.22090662  | 13.55530699  | 0.00000000 |
| C | -1.22964084  | 16.36160873  | 0.00000000 |
| C | 0.00000652   | -15.68941673 | 0.00000000 |
| C | 0.00000639   | -14.23505537 | 0.00000000 |
| C | -0.00000368  | 14.23505567  | 0.00000000 |
| C | -0.00000354  | 15.68941711  | 0.00000000 |
| C | 1.22964374   | -16.36160810 | 0.00000000 |
| C | 1.22090906   | -13.55530651 | 0.00000000 |
| C | 1.22089920   | 13.55530676  | 0.00000000 |
| C | 1.22963385   | 16.36160857  | 0.00000000 |
| C | 2.45324926   | -15.68121952 | 0.00000000 |
| C | 2.44431275   | -14.22793967 | 0.00000000 |
| C | 2.44430314   | 14.22793998  | 0.00000000 |
| C | 2.45323966   | 15.68122001  | 0.00000000 |
| C | 3.69016007   | -16.34540625 | 0.00000000 |
| C | 3.66359311   | -13.54011775 | 0.00000000 |
| C | 3.66358386   | 13.54011796  | 0.00000000 |
| C | 3.69015075   | 16.34540687  | 0.00000000 |
| C | 4.90216423   | -15.65328022 | 0.00000000 |
| C | 4.88568025   | -14.20688541 | 0.00000000 |

|   |              |              |            |
|---|--------------|--------------|------------|
| C | 4.88567143   | 14.20688577  | 0.00000000 |
| C | 4.90215537   | 15.65328089  | 0.00000000 |
| C | 6.15673160   | -16.29466952 | 0.00000000 |
| C | 6.10700639   | -13.50777165 | 0.00000000 |
| C | 6.10699813   | 13.50777193  | 0.00000000 |
| C | 6.15672308   | 16.29467048  | 0.00000000 |
| C | 7.34999564   | -15.58945891 | 0.00000000 |
| C | 7.33231791   | -14.14534084 | 0.00000000 |
| C | 7.33231035   | 14.14534133  | 0.00000000 |
| C | 7.34998777   | 15.58945987  | 0.00000000 |
| C | 8.60747896   | -16.26638961 | 0.00000000 |
| C | 8.58908063   | -13.42037658 | 0.00000000 |
| C | 8.65071548   | -12.04037617 | 0.00000000 |
| C | 8.65070887   | 12.04037522  | 0.00000000 |
| C | 8.58907361   | 13.42037679  | 0.00000000 |
| C | 8.60747160   | 16.26639073  | 0.00000000 |
| C | 9.78605884   | -15.58656562 | 0.00000000 |
| C | 9.82996877   | -14.15906942 | 0.00000000 |
| C | 9.86761800   | -11.33355677 | 0.00000000 |
| C | 9.90265452   | -9.94182522  | 0.00000000 |
| C | 9.90264889   | 9.94182172   | 0.00000000 |
| C | 9.86761201   | 11.33355475  | 0.00000000 |
| C | 9.82996250   | 14.15906965  | 0.00000000 |
| C | 9.78605222   | 15.58656649  | 0.00000000 |
| C | 11.03802522  | -13.47948822 | 0.00000000 |
| C | 11.11108111  | -12.07233223 | 0.00000000 |
| C | 11.10865792  | -9.23105704  | 0.00000000 |
| C | 11.13905414  | -7.83527410  | 0.00000000 |
| C | 11.13904999  | 7.83526763   | 0.00000000 |
| C | 11.10865324  | 9.23105223   | 0.00000000 |
| C | 11.11107593  | 12.07233059  | 0.00000000 |
| C | 11.03801988  | 13.47948769  | 0.00000000 |
| C | 12.31720234  | -11.36989644 | 0.00000000 |
| C | 12.36190970  | -9.96656749  | 0.00000000 |
| C | 12.33876224  | -7.11892506  | 0.00000000 |
| C | 12.36140149  | -5.72175743  | 0.00000000 |
| C | 12.36139902  | 5.72174791   | 0.00000000 |
| C | 12.33875920  | 7.11891714   | 0.00000000 |
| C | 12.36190594  | 9.96656313   | 0.00000000 |
| C | 12.31719817  | 11.36989357  | 0.00000000 |
| C | 13.56361317  | -9.24804325  | 0.00000000 |
| C | 13.59758906  | -7.84693958  | 0.00000000 |
| C | 13.55599301  | -4.99938767  | 0.00000000 |
| C | 13.57042366  | -3.59958859  | 0.00000000 |
| C | 13.57042262  | 3.59957651   | 0.00000000 |
| C | 13.55599155  | 4.99937681   | 0.00000000 |
| C | 13.59758696  | 7.84693212   | 0.00000000 |
| C | 13.56361058  | 9.24803750   | 0.00000000 |
| C | 14.79503532  | -7.11875665  | 0.00000000 |
| C | 14.81858688  | -5.71872346  | 0.00000000 |
| C | 14.75904777  | -2.87506771  | 0.00000000 |
| C | 14.76414311  | -1.46783841  | 0.00000000 |
| C | 14.76414306  | 1.46782477   | 0.00000000 |
| C | 14.75904747  | 2.87505466   | 0.00000000 |
| C | 14.81858624  | 5.71871298   | 0.00000000 |
| C | 14.79503431  | 7.11874779   | 0.00000000 |
| C | 16.01252286  | -4.97986028  | 0.00000000 |
| C | 16.01971723  | -3.58397836  | 0.00000000 |
| C | 15.92884748  | -0.72545785  | 0.00000000 |
| C | 15.92884762  | 0.72544359   | 0.00000000 |
| C | 16.01971754  | 3.58396551   | 0.00000000 |
| C | 16.01252303  | 4.97984866   | 0.00000000 |
| C | 17.20243436  | -2.81794052  | 0.00000000 |
| C | 17.18828762  | -1.43179091  | 0.00000000 |
| C | 17.18828801  | 1.43177663   | 0.00000000 |
| C | 17.20243505  | 2.81792692   | 0.00000000 |
| C | 18.40280639  | -0.68037682  | 0.00000000 |
| C | 18.40280666  | 0.68036210   | 0.00000000 |
| H | -19.34974163 | -1.23775330  | 0.00000000 |
| H | -19.34974134 | 1.23776737   | 0.00000000 |
| H | -18.17110927 | -3.33965681  | 0.00000000 |
| H | -18.17110866 | 3.33966960   | 0.00000000 |
| H | -16.97107575 | -5.51965111  | 0.00000000 |
| H | -16.97107576 | 5.51966178   | 0.00000000 |
| H | -15.74911491 | -7.66642446  | 0.00000000 |
| H | -15.74911615 | 7.66643244   | 0.00000000 |
| H | -14.51393194 | -9.80220853  | 0.00000000 |
| H | -14.51393492 | 9.80221349   | 0.00000000 |
| H | -13.78636526 | -0.96660031  | 0.00000000 |
| H | -13.78636579 | 0.96661322   | 0.00000000 |
| H | -13.26301794 | -11.93170118 | 0.00000000 |
| H | -13.26302276 | 11.93170355  | 0.00000000 |
| H | -12.61278563 | -3.05797724  | 0.00000000 |

|                  |              |              |            |
|------------------|--------------|--------------|------------|
| H                | -12.61278754 | 3.05798902   | 0.00000000 |
| H                | -11.97367469 | -14.05838324 | 0.00000000 |
| H                | -11.97368105 | 14.05838355  | 0.00000000 |
| H                | -11.40751274 | -5.17384298  | 0.00000000 |
| H                | -11.40751641 | 5.17385248   | 0.00000000 |
| H                | -10.74207209 | -16.12819473 | 0.00000000 |
| H                | -10.74208016 | 16.12819370  | 0.00000000 |
| H                | -10.18859452 | -7.28142997  | 0.00000000 |
| H                | -10.18860003 | 7.28143664   | 0.00000000 |
| H                | -8.95572232  | -9.38172786  | 0.00000000 |
| H                | -8.95572942  | 9.38173173   | 0.00000000 |
| H                | -8.59750063  | -17.36512734 | 0.00000000 |
| H                | -8.59750966  | 17.36512631  | 0.00000000 |
| H                | -7.72826184  | -11.44335822 | 0.00000000 |
| H                | -7.72826984  | 11.44335981  | 0.00000000 |
| H                | -6.18917272  | -17.39442805 | 0.00000000 |
| H                | -6.05229446  | -12.41039556 | 0.00000000 |
| H                | -6.05230365  | 12.41039595  | 0.00000000 |
| H                | -6.18918271  | 17.39442751  | 0.00000000 |
| H                | -3.70254054  | -17.44540842 | 0.00000000 |
| H                | -3.65314774  | -12.44001871 | 0.00000000 |
| H                | -3.65315757  | 12.44001911  | 0.00000000 |
| H                | -3.70255081  | 17.44540845  | 0.00000000 |
| H                | -1.23326209  | -17.46167639 | 0.00000000 |
| H                | -1.21758898  | -12.45528652 | 0.00000000 |
| H                | -1.21759898  | 12.45528682  | 0.00000000 |
| H                | -1.23327228  | 17.46167674  | 0.00000000 |
| H                | 1.23327538   | -17.46167606 | 0.00000000 |
| H                | 1.21760131   | -12.45528637 | 0.00000000 |
| H                | 1.21759157   | 12.45528653  | 0.00000000 |
| H                | 1.23326553   | 17.46167661  | 0.00000000 |
| H                | 3.70255331   | -17.44540739 | 0.00000000 |
| H                | 3.65315935   | -12.44001831 | 0.00000000 |
| H                | 3.65315024   | 12.44001831  | 0.00000000 |
| H                | 3.70254398   | 17.44540814  | 0.00000000 |
| H                | 6.18918445   | -17.39442608 | 0.00000000 |
| H                | 6.05230478   | -12.41039489 | 0.00000000 |
| H                | 6.05229665   | 12.41039483  | 0.00000000 |
| H                | 6.18917586   | 17.39442723  | 0.00000000 |
| H                | 7.72826946   | -11.44335925 | 0.00000000 |
| H                | 7.72826267   | 11.44335782  | 0.00000000 |
| H                | 8.59751077   | -17.36512451 | 0.00000000 |
| H                | 8.59750350   | 17.36512586  | 0.00000000 |
| H                | 8.95572841   | -9.38173144  | 0.00000000 |
| H                | 8.95572235   | 9.38172758   | 0.00000000 |
| H                | 10.18859835  | -7.28143669  | 0.00000000 |
| H                | 10.18859366  | 7.28142992   | 0.00000000 |
| H                | 10.74208064  | -16.12819179 | 0.00000000 |
| H                | 10.74207430  | 16.12819284  | 0.00000000 |
| H                | 11.40751412  | -5.17385273  | 0.00000000 |
| H                | 11.40751106  | 5.17384311   | 0.00000000 |
| H                | 11.97368083  | -14.05838202 | 0.00000000 |
| H                | 11.97367604  | 14.05838147  | 0.00000000 |
| H                | 12.61278499  | -3.05798919  | 0.00000000 |
| H                | 12.61278344  | 3.05797726   | 0.00000000 |
| H                | 13.26302188  | -11.93170253 | 0.00000000 |
| H                | 13.26301838  | 11.93169970  | 0.00000000 |
| H                | 13.78636329  | -0.96661335  | 0.00000000 |
| H                | 13.78636287  | 0.96660024   | 0.00000000 |
| H                | 14.51393346  | -9.80221287  | 0.00000000 |
| H                | 14.51393151  | 9.80220737   | 0.00000000 |
| H                | 15.74911420  | -7.66643202  | 0.00000000 |
| H                | 15.74911373  | 7.66642350   | 0.00000000 |
| H                | 16.97107340  | -5.51966159  | 0.00000000 |
| H                | 16.97107393  | 5.51965035   | 0.00000000 |
| H                | 18.17110605  | -3.33966975  | 0.00000000 |
| H                | 18.17110696  | 3.33965640   | 0.00000000 |
| H                | 19.34973868  | -1.23776774  | 0.00000000 |
| H                | 19.34973910  | 1.23775301   | 0.00000000 |
| 9-HGQR (singlet) |              |              |            |
| C                | -20.85842851 | -0.68040719  | 0.00000000 |
| C                | -20.85842866 | 0.68040932   | 0.00000000 |
| C                | -19.65811684 | -2.81745563  | 0.00000000 |
| C                | -19.64370151 | -1.43066389  | 0.00000000 |
| C                | -19.64370184 | 1.43066628   | 0.00000000 |
| C                | -19.65811747 | 2.81745798   | 0.00000000 |
| C                | -18.47049883 | -4.97974571  | 0.00000000 |
| C                | -18.47635392 | -3.58282745  | 0.00000000 |
| C                | -18.38449792 | -0.72522903  | 0.00000000 |
| C                | -18.38449809 | 0.72523172   | 0.00000000 |
| C                | -18.47635477 | 3.58283005   | 0.00000000 |
| C                | -18.47050000 | 4.97974824   | 0.00000000 |
| C                | -17.25739434 | -7.11998568  | 0.00000000 |

|   |              |              |            |
|---|--------------|--------------|------------|
| C | -17.27857928 | -5.71903694  | 0.00000000 |
| C | -17.21542323 | -2.87554524  | 0.00000000 |
| C | -17.21932630 | -1.46901154  | 0.00000000 |
| C | -17.21932668 | 1.46901447   | 0.00000000 |
| C | -17.21542397 | 2.87554813   | 0.00000000 |
| C | -17.27858067 | 5.71903966   | 0.00000000 |
| C | -17.25739603 | 7.11998829   | 0.00000000 |
| C | -16.03250177 | -9.25116924  | 0.00000000 |
| C | -16.06250424 | -7.85039698  | 0.00000000 |
| C | -16.01486504 | -5.00211560  | 0.00000000 |
| C | -16.02698733 | -3.60327468  | 0.00000000 |
| C | -16.02698829 | 3.60327777   | 0.00000000 |
| C | -16.01486636 | 5.00211860   | 0.00000000 |
| C | -16.06250614 | 7.85039973   | 0.00000000 |
| C | -16.03250389 | 9.25117186   | 0.00000000 |
| C | -14.79523056 | -11.37503584 | 0.00000000 |
| C | -14.83299600 | -9.97507847  | 0.00000000 |
| C | -14.80125498 | -7.12533227  | 0.00000000 |
| C | -14.82120614 | -5.72865461  | 0.00000000 |
| C | -14.82120768 | 5.72865773   | 0.00000000 |
| C | -14.80125684 | 7.12533526   | 0.00000000 |
| C | -14.83299832 | 9.97508119   | 0.00000000 |
| C | -14.79523305 | 11.37503846  | 0.00000000 |
| C | -13.54468508 | -13.49315897 | 0.00000000 |
| C | -13.59125282 | -12.09140314 | 0.00000000 |
| C | -13.57585935 | -9.24288762  | 0.00000000 |
| C | -13.60385837 | -7.84570545  | 0.00000000 |
| C | -13.60386044 | 7.84570850   | 0.00000000 |
| C | -13.57586167 | 9.24289052   | 0.00000000 |
| C | -13.59125546 | 12.09140579  | 0.00000000 |
| C | -13.54468776 | 13.49316153  | 0.00000000 |
| C | -12.26341603 | -15.60043947 | 0.00000000 |
| C | -12.33675744 | -14.19448344 | 0.00000000 |
| C | -12.33982486 | -11.35321340 | 0.00000000 |
| C | -12.37490544 | -9.95615126  | 0.00000000 |
| C | -12.37490792 | 9.95615414   | 0.00000000 |
| C | -12.33982752 | 11.35321614  | 0.00000000 |
| C | -12.33676020 | 14.19448596  | 0.00000000 |
| C | -12.26341871 | 15.60044193  | 0.00000000 |
| C | -11.01143737 | -17.70683628 | 0.00000000 |
| C | -11.05449588 | -16.27975420 | 0.00000000 |
| C | -11.09481726 | -13.45425838 | 0.00000000 |
| C | -11.13322817 | -12.06108263 | 0.00000000 |
| C | -11.13323094 | 12.06108529  | 0.00000000 |
| C | -11.09482010 | 13.45426091  | 0.00000000 |
| C | -11.05449857 | 16.27975655  | 0.00000000 |
| C | -11.01143987 | 17.70683859  | 0.00000000 |
| C | -9.83266073  | -18.38643522 | 0.00000000 |
| C | -9.81469512  | -15.54047689 | 0.00000000 |
| C | -9.87770785  | -14.15937090 | 0.00000000 |
| C | -9.87771071  | 14.15937326  | 0.00000000 |
| C | -9.81469793  | 15.54047915  | 0.00000000 |
| C | -9.83266316  | 18.38643737  | 0.00000000 |
| C | -8.57625410  | -17.70843447 | 0.00000000 |
| C | -8.55814441  | -16.26495649 | 0.00000000 |
| C | -8.55814718  | 16.26495855  | 0.00000000 |
| C | -8.57625664  | 17.70843649  | 0.00000000 |
| C | -7.38248602  | -18.41401454 | 0.00000000 |
| C | -7.33145627  | -15.62750408 | 0.00000000 |
| C | -7.33145922  | 15.62750590  | 0.00000000 |
| C | -7.38248842  | 18.41401632  | 0.00000000 |
| C | -6.12908656  | -17.77293699 | 0.00000000 |
| C | -6.11120596  | -16.32713048 | 0.00000000 |
| C | -6.11120881  | 16.32713202  | 0.00000000 |
| C | -6.12908908  | 17.77293852  | 0.00000000 |
| C | -4.91684795  | -18.46666659 | 0.00000000 |
| C | -4.88645294  | -15.66204784 | 0.00000000 |
| C | -4.88645600  | 15.66204904  | 0.00000000 |
| C | -4.91685027  | 18.46666779  | 0.00000000 |
| C | -3.68064021  | -17.80435934 | 0.00000000 |
| C | -3.66909041  | -16.35131624 | 0.00000000 |
| C | -3.66909329  | 16.35131709  | 0.00000000 |
| C | -3.68064269  | 17.80436020  | 0.00000000 |
| C | -2.45748939  | -18.48728757 | 0.00000000 |
| C | -2.44249794  | -15.68159993 | 0.00000000 |
| C | -2.44250103  | 15.68160038  | 0.00000000 |
| C | -2.45749163  | 18.48728804  | 0.00000000 |
| C | -1.22721564  | -17.81845026 | 0.00000000 |
| C | -1.22335400  | -16.36346419 | 0.00000000 |
| C | -1.22335686  | 16.36346425  | 0.00000000 |
| C | -1.22721807  | 17.81845031  | 0.00000000 |
| C | -0.00000061  | -18.49408383 | 0.00000000 |
| C | 0.00000039   | -15.68788326 | 0.00000000 |

|   |             |              |            |
|---|-------------|--------------|------------|
| C | -0.00000268 | 15.68788289  | 0.00000000 |
| C | -0.00000278 | 18.49408346  | 0.00000000 |
| C | 1.22721493  | -17.81845113 | 0.00000000 |
| C | 1.22335431  | -16.36346501 | 0.00000000 |
| C | 1.22335151  | 16.36346423  | 0.00000000 |
| C | 1.22721256  | 17.81845035  | 0.00000000 |
| C | 2.45748836  | -18.48728936 | 0.00000000 |
| C | 2.44249870  | -15.68160157 | 0.00000000 |
| C | 2.44249574  | 15.68160039  | 0.00000000 |
| C | 2.45748622  | 18.48728820  | 0.00000000 |
| C | 3.68063977  | -17.80436181 | 0.00000000 |
| C | 3.66909077  | -16.35131857 | 0.00000000 |
| C | 3.66908807  | 16.35131702  | 0.00000000 |
| C | 3.68063745  | 17.80436027  | 0.00000000 |
| C | 4.91684733  | -18.46666993 | 0.00000000 |
| C | 4.88645370  | -15.66205086 | 0.00000000 |
| C | 4.88645087  | 15.66204897  | 0.00000000 |
| C | 4.91684520  | 18.46666804  | 0.00000000 |
| C | 6.12908660  | -17.77294092 | 0.00000000 |
| C | 6.11120649  | -16.32713415 | 0.00000000 |
| C | 6.11120389  | 16.32713195  | 0.00000000 |
| C | 6.12908431  | 17.77293873  | 0.00000000 |
| C | 7.38248600  | -18.41401899 | 0.00000000 |
| C | 7.33145743  | -15.62750825 | 0.00000000 |
| C | 7.33145476  | 15.62750581  | 0.00000000 |
| C | 7.38248383  | 18.41401658  | 0.00000000 |
| C | 8.57625463  | -17.70843952 | 0.00000000 |
| C | 8.55814562  | -16.26496143 | 0.00000000 |
| C | 8.55814311  | 16.26495878  | 0.00000000 |
| C | 8.57625233  | 17.70843689  | 0.00000000 |
| C | 9.83266115  | -18.38644067 | 0.00000000 |
| C | 9.81469668  | -15.54048195 | 0.00000000 |
| C | 9.87770973  | -14.15937552 | 0.00000000 |
| C | 9.87770717  | 14.15937268  | 0.00000000 |
| C | 9.81469413  | 15.54047915  | 0.00000000 |
| C | 9.83265891  | 18.38643794  | 0.00000000 |
| C | 11.01143836 | -17.70684195 | 0.00000000 |
| C | 11.05449747 | -16.27975965 | 0.00000000 |
| C | 11.09481934 | -13.45426258 | 0.00000000 |
| C | 11.13323045 | -12.06108652 | 0.00000000 |
| C | 11.13322802 | 12.06108364  | 0.00000000 |
| C | 11.09481680 | 13.45425971  | 0.00000000 |
| C | 11.05449498 | 16.27975681  | 0.00000000 |
| C | 11.01143605 | 17.70683912  | 0.00000000 |
| C | 12.26341812 | -15.60044446 | 0.00000000 |
| C | 12.33675961 | -14.19448784 | 0.00000000 |
| C | 12.33982726 | -11.35321676 | 0.00000000 |
| C | 12.37490802 | -9.95615428  | 0.00000000 |
| C | 12.37490583 | 9.95615145   | 0.00000000 |
| C | 12.33982490 | 11.35321395  | 0.00000000 |
| C | 12.33675707 | 14.19448501  | 0.00000000 |
| C | 12.26341560 | 15.60044161  | 0.00000000 |
| C | 13.54468766 | -13.49316282 | 0.00000000 |
| C | 13.59125543 | -12.09140644 | 0.00000000 |
| C | 13.57586216 | -9.24289027  | 0.00000000 |
| C | 13.60386138 | -7.84570779  | 0.00000000 |
| C | 13.60385955 | 7.84570512   | 0.00000000 |
| C | 13.57586009 | 9.24288760   | 0.00000000 |
| C | 13.59125302 | 12.09140376  | 0.00000000 |
| C | 13.54468517 | 13.49316011  | 0.00000000 |
| C | 14.79523334 | -11.37503873 | 0.00000000 |
| C | 14.83299886 | -9.97508114  | 0.00000000 |
| C | 14.80125820 | -7.12533452  | 0.00000000 |
| C | 14.82120968 | -5.72865671  | 0.00000000 |
| C | 14.82120827 | 5.72865425   | 0.00000000 |
| C | 14.80125650 | 7.12533205   | 0.00000000 |
| C | 14.83299670 | 9.97507865   | 0.00000000 |
| C | 14.79523103 | 11.37503622  | 0.00000000 |
| C | 16.03250466 | -9.25117180  | 0.00000000 |
| C | 16.06250733 | -7.85039951  | 0.00000000 |
| C | 16.01486855 | -5.00211774  | 0.00000000 |
| C | 16.02699116 | -3.60327691  | 0.00000000 |
| C | 16.02699025 | 3.60327470   | 0.00000000 |
| C | 16.01486732 | 5.00211553   | 0.00000000 |
| C | 16.06250553 | 7.85039728   | 0.00000000 |
| C | 16.03250263 | 9.25116954   | 0.00000000 |
| C | 17.25739762 | -7.11998827  | 0.00000000 |
| C | 17.27858273 | -5.71903934  | 0.00000000 |
| C | 17.21542689 | -2.87554749  | 0.00000000 |
| C | 17.21933017 | -1.46901370  | 0.00000000 |
| C | 17.21932981 | 1.46901179   | 0.00000000 |
| C | 17.21542617 | 2.87554557   | 0.00000000 |
| C | 17.27858135 | 5.71903740   | 0.00000000 |

|   |              |              |            |
|---|--------------|--------------|------------|
| C | 17.25739596  | 7.11998631   | 0.00000000 |
| C | 18.47050265  | -4.97974815  | 0.00000000 |
| C | 18.47635781  | -3.58282954  | 0.00000000 |
| C | 18.38450187  | -0.72523117  | 0.00000000 |
| C | 18.38450169  | 0.72522954   | 0.00000000 |
| C | 18.47635693  | 3.58282791   | 0.00000000 |
| C | 18.47050144  | 4.97974651   | 0.00000000 |
| C | 19.65812085  | -2.81745756  | 0.00000000 |
| C | 19.64370558  | -1.43066570  | 0.00000000 |
| C | 19.64370523  | 1.43066438   | 0.00000000 |
| C | 19.65812016  | 2.81745624   | 0.00000000 |
| C | 20.85843231  | -0.68040880  | 0.00000000 |
| C | 20.85843215  | 0.68040778   | 0.00000000 |
| H | -21.80513493 | -1.23819657  | 0.00000000 |
| H | -21.80513520 | 1.23819847   | 0.00000000 |
| H | -20.62697730 | -3.33885668  | 0.00000000 |
| H | -20.62697804 | 3.33885877   | 0.00000000 |
| H | -19.42985743 | -5.51814957  | 0.00000000 |
| H | -19.42985870 | 5.51815184   | 0.00000000 |
| H | -18.21276588 | -7.66545296  | 0.00000000 |
| H | -18.21276763 | 7.66545535   | 0.00000000 |
| H | -16.98459005 | -9.80235327  | 0.00000000 |
| H | -16.98459219 | 9.80235573   | 0.00000000 |
| H | -16.24146385 | -0.96788239  | 0.00000000 |
| H | -16.24146413 | 0.96788552   | 0.00000000 |
| H | -15.74404343 | -11.93183005 | 0.00000000 |
| H | -15.74404592 | 11.93183256  | 0.00000000 |
| H | -15.06859178 | -3.06296436  | 0.00000000 |
| H | -15.06859266 | 3.06296765   | 0.00000000 |
| H | -14.48949858 | -14.05669227 | 0.00000000 |
| H | -14.48950122 | 14.05669482  | 0.00000000 |
| H | -13.86615148 | -5.18272316  | 0.00000000 |
| H | -13.86615297 | 5.18272646   | 0.00000000 |
| H | -13.19872642 | -16.17990829 | 0.00000000 |
| H | -13.19872903 | 16.17991081  | 0.00000000 |
| H | -12.65180322 | -7.29457166  | 0.00000000 |
| H | -12.65180527 | 7.29457487   | 0.00000000 |
| H | -11.96759402 | -18.24823757 | 0.00000000 |
| H | -11.96759642 | 18.24824001  | 0.00000000 |
| H | -11.42581787 | -9.39990909  | 0.00000000 |
| H | -11.42582035 | 9.39991209   | 0.00000000 |
| H | -10.18723903 | -11.49935781 | 0.00000000 |
| H | -10.18724182 | 11.49936052  | 0.00000000 |
| H | -9.82195870  | -19.48516949 | 0.00000000 |
| H | -9.82196100  | 19.48517162  | 0.00000000 |
| H | -8.95546134  | -13.56198873 | 0.00000000 |
| H | -8.95546427  | 13.56199106  | 0.00000000 |
| H | -7.41514621  | -19.51377500 | 0.00000000 |
| H | -7.27680245  | -14.53009379 | 0.00000000 |
| H | -7.27680558  | 14.53009563  | 0.00000000 |
| H | -7.41514837  | 19.51377678  | 0.00000000 |
| H | -4.93079056  | -19.56666813 | 0.00000000 |
| H | -4.87459608  | -14.56193655 | 0.00000000 |
| H | -4.87459945  | 14.56193777  | 0.00000000 |
| H | -4.93079256  | 19.56666932  | 0.00000000 |
| H | -2.46371396  | -19.58736763 | 0.00000000 |
| H | -2.43686224  | -14.58155710 | 0.00000000 |
| H | -2.43686568  | 14.58155756  | 0.00000000 |
| H | -2.46371582  | 19.58736809  | 0.00000000 |
| H | -0.00000092  | -19.59418448 | 0.00000000 |
| H | 0.00000081   | -14.58783317 | 0.00000000 |
| H | -0.00000270  | 14.58783280  | 0.00000000 |
| H | -0.00000273  | 19.59418412  | 0.00000000 |
| H | 2.46371232   | -19.58736949 | 0.00000000 |
| H | 2.43686372   | -14.58155872 | 0.00000000 |
| H | 2.43686042   | 14.58155755  | 0.00000000 |
| H | 2.46371054   | 19.58736833  | 0.00000000 |
| H | 4.93078930   | -19.56667154 | 0.00000000 |
| H | 4.87459757   | -14.56193951 | 0.00000000 |
| H | 4.87459445   | 14.56193763  | 0.00000000 |
| H | 4.93078748   | 19.56666966  | 0.00000000 |
| H | 7.41514550   | -19.51377950 | 0.00000000 |
| H | 7.27680399   | -14.53009784 | 0.00000000 |
| H | 7.27680115   | 14.53009540  | 0.00000000 |
| H | 7.41514354   | 19.51377709  | 0.00000000 |
| H | 8.95546301   | -13.56199354 | 0.00000000 |
| H | 8.95546042   | 13.56199073  | 0.00000000 |
| H | 9.82195879   | -19.48517495 | 0.00000000 |
| H | 9.82195663   | 19.48517223  | 0.00000000 |
| H | 10.18724123  | -11.49936182 | 0.00000000 |
| H | 10.18723884  | 11.49935885  | 0.00000000 |
| H | 11.42582045  | -9.39991215  | 0.00000000 |
| H | 11.42581833  | 9.39990919   | 0.00000000 |

|   |             |              |            |
|---|-------------|--------------|------------|
| H | 11.96759501 | -18.24824346 | 0.00000000 |
| H | 11.96759277 | 18.24824052  | 0.00000000 |
| H | 12.65180630 | -7.29457395  | 0.00000000 |
| H | 12.65180455 | 7.29457110   | 0.00000000 |
| H | 13.19872873 | -16.17991322 | 0.00000000 |
| H | 13.19872624 | 16.17991035  | 0.00000000 |
| H | 13.86615514 | -5.18272516  | 0.00000000 |
| H | 13.86615384 | 5.18272249   | 0.00000000 |
| H | 14.48950134 | -14.05669612 | 0.00000000 |
| H | 14.48949882 | 14.05669349  | 0.00000000 |
| H | 15.06859579 | -3.06296636  | 0.00000000 |
| H | 15.06859500 | 3.06296393   | 0.00000000 |
| H | 15.74404627 | -11.93183301 | 0.00000000 |
| H | 15.74404390 | 11.93183063  | 0.00000000 |
| H | 16.24146779 | -0.96788431  | 0.00000000 |
| H | 16.24146754 | 0.96788215   | 0.00000000 |
| H | 16.98459298 | -9.80235587  | 0.00000000 |
| H | 16.98459086 | 9.80235380   | 0.00000000 |
| H | 18.21276926 | -7.66545556  | 0.00000000 |
| H | 18.21276750 | 7.66545382   | 0.00000000 |
| H | 19.42986133 | -5.51815217  | 0.00000000 |
| H | 19.42986000 | 5.51815078   | 0.00000000 |
| H | 20.62698122 | -3.33885897  | 0.00000000 |
| H | 20.62698039 | 3.33885790   | 0.00000000 |
| H | 21.80513880 | -1.23819812  | 0.00000000 |
| H | 21.80513849 | 1.23819734   | 0.00000000 |

## 10-HGQR (singlet)

|   |              |              |            |
|---|--------------|--------------|------------|
| C | -23.31536584 | -0.68034118  | 0.00000000 |
| C | -23.31536585 | 0.68034077   | 0.00000000 |
| C | -22.11517649 | -2.81698465  | 0.00000000 |
| C | -22.10034997 | -1.42995804  | 0.00000000 |
| C | -22.10034994 | 1.42995759   | 0.00000000 |
| C | -22.11517642 | 2.81698421   | 0.00000000 |
| C | -20.92931340 | -4.97962252  | 0.00000000 |
| C | -20.93399192 | -3.58204656  | 0.00000000 |
| C | -20.84124199 | -0.72524635  | 0.00000000 |
| C | -20.84124198 | 0.72524586   | 0.00000000 |
| C | -20.93399182 | 3.58204612   | 0.00000000 |
| C | -20.92931328 | 4.97962211   | 0.00000000 |
| C | -19.71936896 | -7.12104588  | 0.00000000 |
| C | -19.73883302 | -5.71907703  | 0.00000000 |
| C | -19.67291777 | -2.87608440  | 0.00000000 |
| C | -19.67592087 | -1.46983187  | 0.00000000 |
| C | -19.67592084 | 1.46983136   | 0.00000000 |
| C | -19.67291767 | 2.87608391   | 0.00000000 |
| C | -19.73883285 | 5.71907660   | 0.00000000 |
| C | -19.71936875 | 7.12104550   | 0.00000000 |
| C | -18.49904860 | -9.25395943  | 0.00000000 |
| C | -18.52663769 | -7.85228642  | 0.00000000 |
| C | -18.47454768 | -5.00417689  | 0.00000000 |
| C | -18.48469562 | -3.60606317  | 0.00000000 |
| C | -18.48469547 | 3.60606267   | 0.00000000 |
| C | -18.47454749 | 5.00417642   | 0.00000000 |
| C | -18.52663744 | 7.85228605   | 0.00000000 |
| C | -18.49904832 | 9.25395913   | 0.00000000 |
| C | -17.26807629 | -11.37986791 | 0.00000000 |
| C | -17.30212545 | -9.98021191  | 0.00000000 |
| C | -17.26410949 | -7.12979896  | 0.00000000 |
| C | -17.28138599 | -5.73411022  | 0.00000000 |
| C | -17.28138575 | 5.73410976   | 0.00000000 |
| C | -17.26410923 | 7.12979856   | 0.00000000 |
| C | -17.30212512 | 9.98021163   | 0.00000000 |
| C | -17.26807593 | 11.37986770  | 0.00000000 |
| C | -16.02602345 | -13.49990486 | 0.00000000 |
| C | -16.06620769 | -12.10144648 | 0.00000000 |
| C | -16.04257578 | -9.25088812  | 0.00000000 |
| C | -16.06778964 | -7.85428632  | 0.00000000 |
| C | -16.06778933 | 7.85428596   | 0.00000000 |
| C | -16.04257544 | 9.25088782   | 0.00000000 |
| C | -16.06620729 | 12.10144630  | 0.00000000 |
| C | -16.02602302 | 13.49990474  | 0.00000000 |
| C | -14.77203081 | -15.61524960 | 0.00000000 |
| C | -14.81998426 | -14.21469738 | 0.00000000 |
| C | -14.81103115 | -11.36622677 | 0.00000000 |
| C | -14.84388741 | -9.96792050  | 0.00000000 |
| C | -14.84388701 | 9.96792024   | 0.00000000 |
| C | -14.81103071 | 11.36622658  | 0.00000000 |
| C | -14.81998380 | 14.21469730  | 0.00000000 |
| C | -14.77203032 | 15.61524956  | 0.00000000 |
| C | -13.48889590 | -17.72064319 | 0.00000000 |
| C | -13.56268453 | -16.31538390 | 0.00000000 |
| C | -13.57033582 | -13.47446711 | 0.00000000 |
| C | -13.60925427 | -12.07613788 | 0.00000000 |

|   |              |              |            |
|---|--------------|--------------|------------|
| C | -13.60925379 | 12.07613772  | 0.00000000 |
| C | -13.57033532 | 13.47446700  | 0.00000000 |
| C | -13.56268401 | 16.31538389  | 0.00000000 |
| C | -13.48889538 | 17.72064320  | 0.00000000 |
| C | -12.23670892 | -19.82632943 | 0.00000000 |
| C | -12.27937056 | -18.39933320 | 0.00000000 |
| C | -12.32208096 | -15.57392816 | 0.00000000 |
| C | -12.36309258 | -14.17980994 | 0.00000000 |
| C | -12.36309206 | 14.17980986  | 0.00000000 |
| C | -12.32208043 | 15.57392812  | 0.00000000 |
| C | -12.27937002 | 18.39933323  | 0.00000000 |
| C | -12.23670838 | 19.82632946  | 0.00000000 |
| C | -11.05789554 | -20.50556312 | 0.00000000 |
| C | -11.04045567 | -17.65939809 | 0.00000000 |
| C | -11.10452989 | -16.27776008 | 0.00000000 |
| C | -11.10452934 | 16.27776007  | 0.00000000 |
| C | -11.04045510 | 17.65939812  | 0.00000000 |
| C | -11.05789500 | 20.50556316  | 0.00000000 |
| C | -9.80209536  | -19.82664392 | 0.00000000 |
| C | -9.78368151  | -18.38359370 | 0.00000000 |
| C | -9.78368094  | 18.38359373  | 0.00000000 |
| C | -9.80209479  | 19.82664396  | 0.00000000 |
| C | -8.60821648  | -20.53247459 | 0.00000000 |
| C | -8.55631002  | -17.74619262 | 0.00000000 |
| C | -8.55630944  | 17.74619264  | 0.00000000 |
| C | -8.60821591  | 20.53247461  | 0.00000000 |
| C | -7.35550707  | -19.89151814 | 0.00000000 |
| C | -7.33660347  | -18.44624424 | 0.00000000 |
| C | -7.33660290  | 18.44624427  | 0.00000000 |
| C | -7.35550650  | 19.89151817  | 0.00000000 |
| C | -6.14324485  | -20.58647732 | 0.00000000 |
| C | -6.11004698  | -17.78234476 | 0.00000000 |
| C | -6.11004642  | 17.78234479  | 0.00000000 |
| C | -6.14324428  | 20.58647733  | 0.00000000 |
| C | -4.90769961  | -19.92537152 | 0.00000000 |
| C | -4.89420680  | -18.47284169 | 0.00000000 |
| C | -4.89420626  | 18.47284172  | 0.00000000 |
| C | -4.90769906  | 19.92537154  | 0.00000000 |
| C | -3.68454979  | -20.61028086 | 0.00000000 |
| C | -3.66490316  | -17.80522581 | 0.00000000 |
| C | -3.66490266  | 17.80522583  | 0.00000000 |
| C | -3.68454927  | 20.61028086  | 0.00000000 |
| C | -2.45467294  | -19.94369886 | 0.00000000 |
| C | -2.44791259  | -18.48889101 | 0.00000000 |
| C | -2.44791213  | 18.48889103  | 0.00000000 |
| C | -2.45467247  | 19.94369884  | 0.00000000 |
| C | -1.22798274  | -20.62196850 | 0.00000000 |
| C | -1.22144833  | -17.81638595 | 0.00000000 |
| C | -1.22144791  | 17.81638595  | 0.00000000 |
| C | -1.22798231  | 20.62196845  | 0.00000000 |
| C | -0.00001169  | -19.94982987 | 0.00000000 |
| C | -0.00000935  | -18.49418317 | 0.00000000 |
| C | -0.00000897  | 18.49418317  | 0.00000000 |
| C | -0.00001132  | 19.94982984  | 0.00000000 |
| C | 1.22795687   | -20.62197248 | 0.00000000 |
| C | 1.22143176   | -17.81639025 | 0.00000000 |
| C | 1.22143208   | 17.81639025  | 0.00000000 |
| C | 1.22795719   | 20.62197242  | 0.00000000 |
| C | 2.45464877   | -19.94370708 | 0.00000000 |
| C | 2.44789319   | -18.48889962 | 0.00000000 |
| C | 2.44789346   | 18.48889961  | 0.00000000 |
| C | 2.45464905   | 19.94370704  | 0.00000000 |
| C | 3.68452246   | -20.61029299 | 0.00000000 |
| C | 3.66488525   | -17.80523865 | 0.00000000 |
| C | 3.66488548   | 17.80523865  | 0.00000000 |
| C | 3.68452269   | 20.61029295  | 0.00000000 |
| C | 4.90767364   | -19.92538808 | 0.00000000 |
| C | 4.89418567   | -18.47285875 | 0.00000000 |
| C | 4.89418585   | 18.47285874  | 0.00000000 |
| C | 4.90767382   | 19.92538805  | 0.00000000 |
| C | 6.14321573   | -20.58649799 | 0.00000000 |
| C | 6.11002720   | -17.78236593 | 0.00000000 |
| C | 6.11002734   | 17.78236592  | 0.00000000 |
| C | 6.14321587   | 20.58649794  | 0.00000000 |
| C | 7.35547970   | -19.89154325 | 0.00000000 |
| C | 7.33658073   | -18.44626946 | 0.00000000 |
| C | 7.33658083   | 18.44626944  | 0.00000000 |
| C | 7.35547979   | 19.89154322  | 0.00000000 |
| C | 8.60818673   | -20.53250403 | 0.00000000 |
| C | 8.55628934   | -17.74622164 | 0.00000000 |
| C | 8.55628941   | 17.74622162  | 0.00000000 |
| C | 8.60818680   | 20.53250397  | 0.00000000 |
| C | 9.80206809   | -19.82667756 | 0.00000000 |

|   |              |              |            |
|---|--------------|--------------|------------|
| C | 9.78365904   | -18.38362690 | 0.00000000 |
| C | 9.78365906   | 18.38362689  | 0.00000000 |
| C | 9.80206814   | 19.82667753  | 0.00000000 |
| C | 11.05786690  | -20.50560055 | 0.00000000 |
| C | 11.04043593  | -17.65943476 | 0.00000000 |
| C | 11.10451440  | -16.27779527 | 0.00000000 |
| C | 11.10451442  | 16.27779532  | 0.00000000 |
| C | 11.04043593  | 17.65943477  | 0.00000000 |
| C | 11.05786693  | 20.50560055  | 0.00000000 |
| C | 12.23668334  | -19.82637031 | 0.00000000 |
| C | 12.27935002  | -18.39937322 | 0.00000000 |
| C | 12.32206825  | -15.57396494 | 0.00000000 |
| C | 12.36308342  | -14.17984425 | 0.00000000 |
| C | 12.36308339  | 14.17984434  | 0.00000000 |
| C | 12.32206822  | 15.57396499  | 0.00000000 |
| C | 12.27935000  | 18.39937324  | 0.00000000 |
| C | 12.23668334  | 19.82637031  | 0.00000000 |
| C | 13.48887892  | -17.72068543 | 0.00000000 |
| C | 13.56267161  | -16.31542436 | 0.00000000 |
| C | 13.57033020  | -13.47450206 | 0.00000000 |
| C | 13.60925220  | -12.07616944 | 0.00000000 |
| C | 13.60925212  | 12.07616956  | 0.00000000 |
| C | 13.57033014  | 13.47450214  | 0.00000000 |
| C | 13.56267156  | 16.31542439  | 0.00000000 |
| C | 13.48887888  | 17.72068544  | 0.00000000 |
| C | 14.77202148  | -15.61529086 | 0.00000000 |
| C | 14.81997917  | -14.21473598 | 0.00000000 |
| C | 14.81103338  | -11.36625820 | 0.00000000 |
| C | 14.84389316  | -9.96794767  | 0.00000000 |
| C | 14.84389307  | 9.96794788   | 0.00000000 |
| C | 14.81103328  | 11.36625837  | 0.00000000 |
| C | 14.81997909  | 14.21473606  | 0.00000000 |
| C | 14.77202141  | 15.61529091  | 0.00000000 |
| C | 16.02602225  | -13.49994351 | 0.00000000 |
| C | 16.06621096  | -12.10148175 | 0.00000000 |
| C | 16.04258643  | -9.25091462  | 0.00000000 |
| C | 16.06780393  | -7.85430795  | 0.00000000 |
| C | 16.06780383  | 7.85430823   | 0.00000000 |
| C | 16.04258631  | 9.25091487   | 0.00000000 |
| C | 16.06621083  | 12.10148192  | 0.00000000 |
| C | 16.02602216  | 13.49994365  | 0.00000000 |
| C | 17.26808379  | -11.37990251 | 0.00000000 |
| C | 17.30213750  | -9.98024248  | 0.00000000 |
| C | 17.26412895  | -7.12981946  | 0.00000000 |
| C | 17.28140906  | -5.73412575  | 0.00000000 |
| C | 17.28140897  | 5.73412610   | 0.00000000 |
| C | 17.26412885  | 7.12981980   | 0.00000000 |
| C | 17.30213735  | 9.98024274   | 0.00000000 |
| C | 17.26808365  | 11.37990273  | 0.00000000 |
| C | 18.49906520  | -9.25398867  | 0.00000000 |
| C | 18.52665877  | -7.85231108  | 0.00000000 |
| C | 18.47457573  | -5.00419099  | 0.00000000 |
| C | 18.48472686  | -3.60607277  | 0.00000000 |
| C | 18.48472682  | 3.60607321   | 0.00000000 |
| C | 18.47457564  | 5.00419140   | 0.00000000 |
| C | 18.52665863  | 7.85231143   | 0.00000000 |
| C | 18.49906504  | 9.25398897   | 0.00000000 |
| C | 19.71939470  | -7.12106877  | 0.00000000 |
| C | 19.73886285  | -5.71909505  | 0.00000000 |
| C | 19.67295373  | -2.87609250  | 0.00000000 |
| C | 19.67595987  | -1.46983583  | 0.00000000 |
| C | 19.67595985  | 1.46983632   | 0.00000000 |
| C | 19.67295369  | 2.87609297   | 0.00000000 |
| C | 19.73886273  | 5.71909549   | 0.00000000 |
| C | 19.71939457  | 7.12106918   | 0.00000000 |
| C | 20.92934787  | -4.97963890  | 0.00000000 |
| C | 20.93403015  | -3.58205797  | 0.00000000 |
| C | 20.84128518  | -0.72524747  | 0.00000000 |
| C | 20.84128517  | 0.72524801   | 0.00000000 |
| C | 20.93403007  | 3.58205847   | 0.00000000 |
| C | 20.92934774  | 4.97963938   | 0.00000000 |
| C | 22.11521920  | -2.81699467  | 0.00000000 |
| C | 22.10039486  | -1.42996302  | 0.00000000 |
| C | 22.10039484  | 1.42996358   | 0.00000000 |
| C | 22.11521914  | 2.81699521   | 0.00000000 |
| C | 23.31541291  | -0.68034284  | 0.00000000 |
| C | 23.31541290  | 0.68034342   | 0.00000000 |
| H | -24.26191071 | -1.23842340  | 0.00000000 |
| H | -24.26191070 | 1.23842301   | 0.00000000 |
| H | -23.08418650 | -3.33810670  | 0.00000000 |
| H | -23.08418642 | 3.33810630   | 0.00000000 |
| H | -21.88926893 | -5.51697498  | 0.00000000 |
| H | -21.88926881 | 5.51697460   | 0.00000000 |

|   |              |              |            |
|---|--------------|--------------|------------|
| H | -20.67568622 | -7.66487987  | 0.00000000 |
| H | -20.67568602 | 7.66487951   | 0.00000000 |
| H | -19.45245617 | -9.80289882  | 0.00000000 |
| H | -19.45245591 | 9.80289855   | 0.00000000 |
| H | -18.69798706 | -0.96879670  | 0.00000000 |
| H | -18.69798704 | 0.96879617   | 0.00000000 |
| H | -18.21857928 | -11.93382053 | 0.00000000 |
| H | -18.21857894 | 11.93382033  | 0.00000000 |
| H | -17.52570643 | -3.06678520  | 0.00000000 |
| H | -17.52570628 | 3.06678468   | 0.00000000 |
| H | -16.97363720 | -14.05876287 | 0.00000000 |
| H | -16.97363679 | 14.05876276  | 0.00000000 |
| H | -16.32541831 | -5.18973946  | 0.00000000 |
| H | -16.32541805 | 5.18973899   | 0.00000000 |
| H | -15.71601567 | -16.18018305 | 0.00000000 |
| H | -15.71601520 | 16.18018301  | 0.00000000 |
| H | -15.11453448 | -7.30517961  | 0.00000000 |
| H | -15.11453414 | 7.30517924   | 0.00000000 |
| H | -14.42386811 | -18.30065560 | 0.00000000 |
| H | -14.42386760 | 18.30065561  | 0.00000000 |
| H | -13.89328888 | -9.41422656  | 0.00000000 |
| H | -13.89328846 | 9.41422627   | 0.00000000 |
| H | -13.19292558 | -20.36764372 | 0.00000000 |
| H | -13.19292504 | 20.36764374  | 0.00000000 |
| H | -12.66131863 | -11.51789440 | 0.00000000 |
| H | -12.66131813 | 11.51789422  | 0.00000000 |
| H | -11.41791551 | -13.61669601 | 0.00000000 |
| H | -11.41791497 | 13.61669592  | 0.00000000 |
| H | -11.04654977 | -21.60430054 | 0.00000000 |
| H | -11.04654924 | 21.60430058  | 0.00000000 |
| H | -10.18250188 | -15.67999852 | 0.00000000 |
| H | -10.18250134 | 15.67999850  | 0.00000000 |
| H | -8.64098289  | -21.63223252 | 0.00000000 |
| H | -8.50175151  | -16.64875424 | 0.00000000 |
| H | -8.50175093  | 16.64875426  | 0.00000000 |
| H | -8.64098232  | 21.63223254  | 0.00000000 |
| H | -6.15828730  | -21.68647265 | 0.00000000 |
| H | -6.09711140  | -16.68223196 | 0.00000000 |
| H | -6.09711085  | 16.68223199  | 0.00000000 |
| H | -6.15828673  | 21.68647265  | 0.00000000 |
| H | -3.69264658  | -21.71036344 | 0.00000000 |
| H | -3.65747501  | -16.70517152 | 0.00000000 |
| H | -3.65747453  | 16.70517155  | 0.00000000 |
| H | -3.69264604  | 21.71036343  | 0.00000000 |
| H | -1.23067812  | -21.72208729 | 0.00000000 |
| H | -1.21900076  | -16.71631091 | 0.00000000 |
| H | -1.21900037  | 16.71631092  | 0.00000000 |
| H | -1.23067768  | 21.72208723  | 0.00000000 |
| H | 1.23064818   | -21.72209120 | 0.00000000 |
| H | 1.21898786   | -16.71631521 | 0.00000000 |
| H | 1.21898818   | 16.71631523  | 0.00000000 |
| H | 1.23064850   | 21.72209112  | 0.00000000 |
| H | 3.69261542   | -21.71037543 | 0.00000000 |
| H | 3.65746087   | -16.70518433 | 0.00000000 |
| H | 3.65746110   | 16.70518435  | 0.00000000 |
| H | 3.69261566   | 21.71037536  | 0.00000000 |
| H | 6.15825469   | -21.68649328 | 0.00000000 |
| H | 6.09709577   | -16.68225288 | 0.00000000 |
| H | 6.09709590   | 16.68225289  | 0.00000000 |
| H | 6.15825484   | 21.68649322  | 0.00000000 |
| H | 8.64094986   | -21.63226220 | 0.00000000 |
| H | 8.50173513   | -16.64878245 | 0.00000000 |
| H | 8.50173521   | 16.64878244  | 0.00000000 |
| H | 8.64094993   | 21.63226214  | 0.00000000 |
| H | 10.18248772  | -15.68002996 | 0.00000000 |
| H | 10.18248774  | 15.68003002  | 0.00000000 |
| H | 11.04651853  | -21.60433836 | 0.00000000 |
| H | 11.04651854  | 21.60433835  | 0.00000000 |
| H | 11.41790661  | -13.61672680 | 0.00000000 |
| H | 11.41790659  | 13.61672690  | 0.00000000 |
| H | 12.66131626  | -11.51792227 | 0.00000000 |
| H | 12.66131619  | 11.51792240  | 0.00000000 |
| H | 13.19289900  | -20.36768803 | 0.00000000 |
| H | 13.19289900  | 20.36768800  | 0.00000000 |
| H | 13.89329376  | -9.41425003  | 0.00000000 |
| H | 13.89329369  | 9.41425023   | 0.00000000 |
| H | 14.42385077  | -18.30070054 | 0.00000000 |
| H | 14.42385072  | 18.30070054  | 0.00000000 |
| H | 15.11454739  | -7.30519783  | 0.00000000 |
| H | 15.11454732  | 7.30519808   | 0.00000000 |
| H | 15.71600658  | -16.18022679 | 0.00000000 |
| H | 15.71600649  | 16.18022685  | 0.00000000 |
| H | 16.32543968  | -5.18975214  | 0.00000000 |

|   |             |              |            |
|---|-------------|--------------|------------|
| H | 16.32543962 | 5.18975248   | 0.00000000 |
| H | 16.97363656 | -14.05880416 | 0.00000000 |
| H | 16.97363645 | 14.05880430  | 0.00000000 |
| H | 17.52573599 | -3.06679220  | 0.00000000 |
| H | 17.52573598 | 3.06679261   | 0.00000000 |
| H | 18.21858770 | -11.93385784 | 0.00000000 |
| H | 18.21858755 | 11.93385807  | 0.00000000 |
| H | 18.69802406 | -0.96879891  | 0.00000000 |
| H | 18.69802405 | 0.96879938   | 0.00000000 |
| H | 19.45247390 | -9.80293095  | 0.00000000 |
| H | 19.45247372 | 9.80293125   | 0.00000000 |
| H | 20.67571314 | -7.66490570  | 0.00000000 |
| H | 20.67571298 | 7.66490613   | 0.00000000 |
| H | 21.88930444 | -5.51699436  | 0.00000000 |
| H | 21.88930430 | 5.51699485   | 0.00000000 |
| H | 23.08423039 | -3.33811908  | 0.00000000 |
| H | 23.08423031 | 3.33811965   | 0.00000000 |
| H | 24.26196000 | -1.23842529  | 0.00000000 |
| H | 24.26195998 | 1.23842588   | 0.00000000 |

## 11-HGQR (singlet)

|   |              |              |            |
|---|--------------|--------------|------------|
| C | -25.77372936 | -0.68024104  | 0.00000000 |
| C | -25.77372941 | 0.68023886   | 0.00000000 |
| C | -24.57379467 | -2.81648649  | 0.00000000 |
| C | -24.55848190 | -1.42951197  | 0.00000000 |
| C | -24.55848199 | 1.42950989   | 0.00000000 |
| C | -24.57379485 | 2.81648446   | 0.00000000 |
| C | -23.38949637 | -4.97945723  | 0.00000000 |
| C | -23.39304137 | -3.58171067  | 0.00000000 |
| C | -23.29921207 | -0.72530073  | 0.00000000 |
| C | -23.29921211 | 0.72529870   | 0.00000000 |
| C | -23.39304155 | 3.58170876   | 0.00000000 |
| C | -23.38949659 | 4.97945543   | 0.00000000 |
| C | -22.18203115 | -7.12187990  | 0.00000000 |
| C | -22.19997025 | -5.71934034  | 0.00000000 |
| C | -22.13164661 | -2.87673955  | 0.00000000 |
| C | -22.13403540 | -1.47045860  | 0.00000000 |
| C | -22.13403546 | 1.47045667   | 0.00000000 |
| C | -22.13164670 | 2.87673767   | 0.00000000 |
| C | -22.19997043 | 5.71933870   | 0.00000000 |
| C | -22.18203135 | 7.12187840   | 0.00000000 |
| C | -20.96511747 | -9.25635591  | 0.00000000 |
| C | -20.99088395 | -7.85373745  | 0.00000000 |
| C | -20.93515678 | -5.00603044  | 0.00000000 |
| C | -20.94383360 | -3.60820013  | 0.00000000 |
| C | -20.94383367 | 3.60819839   | 0.00000000 |
| C | -20.93515686 | 5.00602880   | 0.00000000 |
| C | -20.99088407 | 7.85373613   | 0.00000000 |
| C | -20.96511760 | 9.25635476   | 0.00000000 |
| C | -19.73864898 | -11.38420391 | 0.00000000 |
| C | -19.77042690 | -9.98366990  | 0.00000000 |
| C | -19.72748963 | -7.13337440  | 0.00000000 |
| C | -19.74253115 | -5.73840062  | 0.00000000 |
| C | -19.74253117 | 5.73839915   | 0.00000000 |
| C | -19.72748964 | 7.13337309   | 0.00000000 |
| C | -19.77042692 | 9.98366895   | 0.00000000 |
| C | -19.73864900 | 11.38420312  | 0.00000000 |
| C | -18.50252513 | -13.50631366 | 0.00000000 |
| C | -18.53937475 | -12.10811270 | 0.00000000 |
| C | -18.50941736 | -9.25684985  | 0.00000000 |
| C | -18.53187001 | -7.86127413  | 0.00000000 |
| C | -18.53186993 | 7.86127300   | 0.00000000 |
| C | -18.50941727 | 9.25684889   | 0.00000000 |
| C | -18.53937467 | 12.10811208  | 0.00000000 |
| C | -18.50252506 | 13.50631319  | 0.00000000 |
| C | -17.25635624 | -15.62341178 | 0.00000000 |
| C | -17.29853195 | -14.22606483 | 0.00000000 |
| C | -17.28171033 | -11.37550339 | 0.00000000 |
| C | -17.31186567 | -9.97788797  | 0.00000000 |
| C | -17.31186550 | 9.97788719   | 0.00000000 |
| C | -17.28171016 | 11.37550278  | 0.00000000 |
| C | -17.29853181 | 14.22606450  | 0.00000000 |
| C | -17.25635612 | 15.62341158  | 0.00000000 |
| C | -15.99934987 | -17.73643489 | 0.00000000 |
| C | -16.04872378 | -16.33654064 | 0.00000000 |
| C | -16.04515558 | -13.48836376 | 0.00000000 |
| C | -16.08211260 | -12.08896395 | 0.00000000 |
| C | -16.08211236 | 12.08896350  | 0.00000000 |
| C | -16.04515535 | 13.48836344  | 0.00000000 |
| C | -16.04872360 | 16.33654055  | 0.00000000 |
| C | -15.99934972 | 17.73643488  | 0.00000000 |
| C | -14.71438642 | -19.84005378 | 0.00000000 |
| C | -14.78900908 | -18.43513533 | 0.00000000 |
| C | -14.80053058 | -15.59448273 | 0.00000000 |

|   |              |              |            |
|---|--------------|--------------|------------|
| C | -14.84251939 | -14.19540482 | 0.00000000 |
| C | -14.84251912 | 14.19540465  | 0.00000000 |
| C | -14.80053033 | 15.59448265  | 0.00000000 |
| C | -14.78900890 | 18.43513541  | 0.00000000 |
| C | -14.71438626 | 19.84005392  | 0.00000000 |
| C | -13.46184007 | -21.94486795 | 0.00000000 |
| C | -13.50444680 | -20.51786613 | 0.00000000 |
| C | -13.54939660 | -17.69241924 | 0.00000000 |
| C | -13.59248623 | -16.29791688 | 0.00000000 |
| C | -13.59248596 | 16.29791691  | 0.00000000 |
| C | -13.54939636 | 17.69241935  | 0.00000000 |
| C | -13.50444662 | 20.51786633  | 0.00000000 |
| C | -13.46183993 | 21.94486817  | 0.00000000 |
| C | -12.28302252 | -22.62365427 | 0.00000000 |
| C | -12.26612451 | -19.77711756 | 0.00000000 |
| C | -12.33125343 | -18.39532634 | 0.00000000 |
| C | -12.33125320 | 18.39532654  | 0.00000000 |
| C | -12.26612428 | 19.77711781  | 0.00000000 |
| C | -12.28302237 | 22.62365456  | 0.00000000 |
| C | -11.02763129 | -21.94396772 | 0.00000000 |
| C | -11.00903902 | -20.50101252 | 0.00000000 |
| C | -11.00903878 | 20.50101284  | 0.00000000 |
| C | -11.02763110 | 21.94396804  | 0.00000000 |
| C | -9.83390396  | -22.64991955 | 0.00000000 |
| C | -9.78136558  | -19.86375270 | 0.00000000 |
| C | -9.78136527  | 19.86375307  | 0.00000000 |
| C | -9.83390377  | 22.64991991  | 0.00000000 |
| C | -8.58143304  | -22.00914610 | 0.00000000 |
| C | -8.56176697  | -20.56409021 | 0.00000000 |
| C | -8.56176667  | 20.56409065  | 0.00000000 |
| C | -8.58143279  | 22.00914653  | 0.00000000 |
| C | -7.36951959  | -22.70499594 | 0.00000000 |
| C | -7.33420484  | -19.90110516 | 0.00000000 |
| C | -7.33420449  | 19.90110565  | 0.00000000 |
| C | -7.36951934  | 22.70499640  | 0.00000000 |
| C | -6.13420204  | -22.04475302 | 0.00000000 |
| C | -6.11922429  | -20.59256268 | 0.00000000 |
| C | -6.11922394  | 20.59256321  | 0.00000000 |
| C | -6.13420174  | 22.04475354  | 0.00000000 |
| C | -4.91131152  | -22.73118604 | 0.00000000 |
| C | -4.88809508  | -19.92654473 | 0.00000000 |
| C | -4.88809469  | 19.92654530  | 0.00000000 |
| C | -4.91131120  | 22.73118658  | 0.00000000 |
| C | -3.68176537  | -22.06620171 | 0.00000000 |
| C | -3.67277206  | -20.61170858 | 0.00000000 |
| C | -3.67277165  | 20.61170917  | 0.00000000 |
| C | -3.68176498  | 22.06620230  | 0.00000000 |
| C | -2.45522825  | -22.74655021 | 0.00000000 |
| C | -2.44365689  | -19.94154030 | 0.00000000 |
| C | -2.44365643  | 19.94154090  | 0.00000000 |
| C | -2.45522781  | 22.74655079  | 0.00000000 |
| C | -1.22747255  | -22.07690048 | 0.00000000 |
| C | -1.22447521  | -20.62124284 | 0.00000000 |
| C | -1.22447470  | 20.62124344  | 0.00000000 |
| C | -1.22747204  | 22.07690109  | 0.00000000 |
| C | -0.00001842  | -22.75160543 | 0.00000000 |
| C | -0.00001373  | -19.94658880 | 0.00000000 |
| C | -0.00001315  | 19.94658938  | 0.00000000 |
| C | -0.00001781  | 22.75160603  | 0.00000000 |
| C | 1.22743811   | -22.07690459 | 0.00000000 |
| C | 1.22444565   | -20.62124689 | 0.00000000 |
| C | 1.22444633   | 20.62124745  | 0.00000000 |
| C | 1.22743881   | 22.07690518  | 0.00000000 |
| C | 2.45519200   | -22.74655848 | 0.00000000 |
| C | 2.44362982   | -19.94154845 | 0.00000000 |
| C | 2.44363059   | 19.94154897  | 0.00000000 |
| C | 2.45519285   | 22.74655905  | 0.00000000 |
| C | 3.68173200   | -22.06621393 | 0.00000000 |
| C | 3.67274334   | -20.61172060 | 0.00000000 |
| C | 3.67274422   | 20.61172108  | 0.00000000 |
| C | 3.68173294   | 22.06621447  | 0.00000000 |
| C | 4.91127697   | -22.73120229 | 0.00000000 |
| C | 4.88806927   | -19.92656069 | 0.00000000 |
| C | 4.88807025   | 19.92656113  | 0.00000000 |
| C | 4.91127808   | 22.73120279  | 0.00000000 |
| C | 6.13417069   | -22.04477304 | 0.00000000 |
| C | 6.11919730   | -20.59258235 | 0.00000000 |
| C | 6.11919842   | 20.59258272  | 0.00000000 |
| C | 6.13417188   | 22.04477347  | 0.00000000 |
| C | 7.36948749   | -22.70501977 | 0.00000000 |
| C | 7.33418105   | -19.90112851 | 0.00000000 |
| C | 7.33418222   | 19.90112882  | 0.00000000 |
| C | 7.36948881   | 22.70502013  | 0.00000000 |

|   |             |              |            |
|---|-------------|--------------|------------|
| C | 8.58140428  | -22.00917347 | 0.00000000 |
| C | 8.56174243  | -20.56411709 | 0.00000000 |
| C | 8.56174372  | 20.56411733  | 0.00000000 |
| C | 8.58140565  | 22.00917374  | 0.00000000 |
| C | 9.83387462  | -22.64995068 | 0.00000000 |
| C | 9.78134412  | -19.86378294 | 0.00000000 |
| C | 9.78134543  | 19.86378312  | 0.00000000 |
| C | 9.83387610  | 22.64995088  | 0.00000000 |
| C | 11.02760548 | -21.94400177 | 0.00000000 |
| C | 11.00901762 | -20.50104568 | 0.00000000 |
| C | 11.00901905 | 20.50104577  | 0.00000000 |
| C | 11.02760697 | 21.94400187  | 0.00000000 |
| C | 12.28299599 | -22.62369183 | 0.00000000 |
| C | 12.26610621 | -19.77715343 | 0.00000000 |
| C | 12.33123992 | -18.39536047 | 0.00000000 |
| C | 12.33124130 | 18.39536048  | 0.00000000 |
| C | 12.26610762 | 19.77715344  | 0.00000000 |
| C | 12.28299755 | 22.62369185  | 0.00000000 |
| C | 13.46181685 | -21.94490776 | 0.00000000 |
| C | 13.50442782 | -20.51790499 | 0.00000000 |
| C | 13.54938591 | -17.69245481 | 0.00000000 |
| C | 13.59247970 | -16.29795022 | 0.00000000 |
| C | 13.59248097 | 16.29795022  | 0.00000000 |
| C | 13.54938724 | 17.69245477  | 0.00000000 |
| C | 13.50442928 | 20.51790492  | 0.00000000 |
| C | 13.46181839 | 21.94490770  | 0.00000000 |
| C | 14.71437060 | -19.84009430 | 0.00000000 |
| C | 14.78899759 | -18.43517431 | 0.00000000 |
| C | 14.80052729 | -15.59451676 | 0.00000000 |
| C | 14.84252033 | -14.19543628 | 0.00000000 |
| C | 14.84252147 | 14.19543635  | 0.00000000 |
| C | 14.80052850 | 15.59451676  | 0.00000000 |
| C | 14.78899893 | 18.43517421  | 0.00000000 |
| C | 14.71437201 | 19.84009419  | 0.00000000 |
| C | 15.99934141 | -17.73647472 | 0.00000000 |
| C | 16.04871990 | -16.33657823 | 0.00000000 |
| C | 16.04515992 | -13.48839509 | 0.00000000 |
| C | 16.08212118 | -12.08899235 | 0.00000000 |
| C | 16.08212216 | 12.08899256  | 0.00000000 |
| C | 16.04516098 | 13.48839519  | 0.00000000 |
| C | 16.04872110 | 16.33657816  | 0.00000000 |
| C | 15.99934267 | 17.73647460  | 0.00000000 |
| C | 17.25635565 | -15.62344957 | 0.00000000 |
| C | 17.29853601 | -14.22609959 | 0.00000000 |
| C | 17.28172225 | -11.37553084 | 0.00000000 |
| C | 17.31188162 | -9.97791213  | 0.00000000 |
| C | 17.31188241 | 9.97791254   | 0.00000000 |
| C | 17.28172312 | 11.37553111  | 0.00000000 |
| C | 17.29853703 | 14.22609962  | 0.00000000 |
| C | 17.25635676 | 15.62344951  | 0.00000000 |
| C | 18.50253272 | -13.50634775 | 0.00000000 |
| C | 18.53938675 | -12.10814314 | 0.00000000 |
| C | 18.50943643 | -9.25687239  | 0.00000000 |
| C | 18.53189271 | -7.86129308  | 0.00000000 |
| C | 18.53189329 | 7.86129374   | 0.00000000 |
| C | 18.50943711 | 9.25687289   | 0.00000000 |
| C | 18.53938757 | 12.10814333  | 0.00000000 |
| C | 18.50253362 | 13.50634782  | 0.00000000 |
| C | 19.73866458 | -11.38423277 | 0.00000000 |
| C | 19.77044648 | -9.98369485  | 0.00000000 |
| C | 19.72751526 | -7.13339133  | 0.00000000 |
| C | 19.74255981 | -5.73841384  | 0.00000000 |
| C | 19.74256019 | 5.73841472   | 0.00000000 |
| C | 19.72751572 | 7.13339207   | 0.00000000 |
| C | 19.77044708 | 9.98369527   | 0.00000000 |
| C | 19.73866526 | 11.38423303  | 0.00000000 |
| C | 20.96514049 | -9.25637854  | 0.00000000 |
| C | 20.99091042 | -7.85375626  | 0.00000000 |
| C | 20.93518826 | -5.00604150  | 0.00000000 |
| C | 20.94386747 | -3.60820776  | 0.00000000 |
| C | 20.94386767 | 3.60820879   | 0.00000000 |
| C | 20.93518852 | 5.00604243   | 0.00000000 |
| C | 20.99091081 | 7.85375692   | 0.00000000 |
| C | 20.96514094 | 9.25637905   | 0.00000000 |
| C | 22.18206062 | -7.12189607  | 0.00000000 |
| C | 22.20000269 | -5.71935303  | 0.00000000 |
| C | 22.13168311 | -2.87674504  | 0.00000000 |
| C | 22.13407368 | -1.47046140  | 0.00000000 |
| C | 22.13407373 | 1.47046251   | 0.00000000 |
| C | 22.13168322 | 2.87674611   | 0.00000000 |
| C | 22.20000290 | 5.71935390   | 0.00000000 |
| C | 22.18206089 | 7.12189681   | 0.00000000 |
| C | 23.38953126 | -4.97946744  | 0.00000000 |

|   |              |              |            |
|---|--------------|--------------|------------|
| C | 23.39307877  | -3.58171774  | 0.00000000 |
| C | 23.29925217  | -0.72530036  | 0.00000000 |
| C | 23.29925218  | 0.72530148   | 0.00000000 |
| C | 23.39307885  | 3.58171875   | 0.00000000 |
| C | 23.38953137  | 4.97946836   | 0.00000000 |
| C | 24.57383419  | -2.81649163  | 0.00000000 |
| C | 24.55852276  | -1.42951378  | 0.00000000 |
| C | 24.55852277  | 1.42951487   | 0.00000000 |
| C | 24.57383422  | 2.81649267   | 0.00000000 |
| C | 25.77377155  | -0.68024108  | 0.00000000 |
| C | 25.77377155  | 0.68024216   | 0.00000000 |
| H | -26.72004199 | -1.23866056  | 0.00000000 |
| H | -26.72004208 | 1.23865834   | 0.00000000 |
| H | -25.54296434 | -3.33730556  | 0.00000000 |
| H | -25.54296456 | 3.33730351   | 0.00000000 |
| H | -24.34989764 | -5.51600877  | 0.00000000 |
| H | -24.34989791 | 5.51600697   | 0.00000000 |
| H | -23.13907225 | -7.66445375  | 0.00000000 |
| H | -23.13907252 | 7.66445224   | 0.00000000 |
| H | -21.91952942 | -9.80358085  | 0.00000000 |
| H | -21.91952962 | 9.80357970   | 0.00000000 |
| H | -21.15595444 | -0.96967639  | 0.00000000 |
| H | -21.15595444 | 0.96967455   | 0.00000000 |
| H | -20.69045206 | -11.93596823 | 0.00000000 |
| H | -20.69045216 | 11.93596743  | 0.00000000 |
| H | -19.98434183 | -3.06980953  | 0.00000000 |
| H | -19.98434183 | 3.06980784   | 0.00000000 |
| H | -19.45172917 | -14.06252096 | 0.00000000 |
| H | -19.45172917 | 14.06252045  | 0.00000000 |
| H | -18.78582295 | -5.19531278  | 0.00000000 |
| H | -18.78582289 | 5.19531134   | 0.00000000 |
| H | -18.20296515 | -16.18398284 | 0.00000000 |
| H | -18.20296508 | 16.18398259  | 0.00000000 |
| H | -17.57764388 | -7.31381954  | 0.00000000 |
| H | -17.57764374 | 7.31381841   | 0.00000000 |
| H | -16.94262714 | -18.30254392 | 0.00000000 |
| H | -16.94262703 | 18.30254387  | 0.00000000 |
| H | -16.36009236 | -9.42616706  | 0.00000000 |
| H | -16.36009213 | 9.42616628   | 0.00000000 |
| H | -15.64898223 | -20.42066545 | 0.00000000 |
| H | -15.64898212 | 20.42066555  | 0.00000000 |
| H | -15.13277526 | -11.53307365 | 0.00000000 |
| H | -15.13277497 | 11.53307319  | 0.00000000 |
| H | -14.41809254 | -22.48605713 | 0.00000000 |
| H | -14.41809244 | 22.48605731  | 0.00000000 |
| H | -13.89559989 | -13.63542065 | 0.00000000 |
| H | -13.89559958 | 13.63542049  | 0.00000000 |
| H | -12.64806274 | -15.73353364 | 0.00000000 |
| H | -12.64806244 | 15.73353369  | 0.00000000 |
| H | -12.27092264 | -23.72235267 | 0.00000000 |
| H | -12.27092252 | 23.72235296  | 0.00000000 |
| H | -11.40957102 | -17.79700150 | 0.00000000 |
| H | -11.40957079 | 17.79700169  | 0.00000000 |
| H | -9.86676444  | -23.74967082 | 0.00000000 |
| H | -9.72675406  | -18.76629978 | 0.00000000 |
| H | -9.72675369  | 18.76630016  | 0.00000000 |
| H | -9.86676429  | 23.74967117  | 0.00000000 |
| H | -7.38532328  | -23.80497710 | 0.00000000 |
| H | -7.32040697  | -18.80099981 | 0.00000000 |
| H | -7.32040658  | 18.80100031  | 0.00000000 |
| H | -7.38532308  | 23.80497756  | 0.00000000 |
| H | -4.92079293  | -23.83126301 | 0.00000000 |
| H | -4.87925512  | -18.82649204 | 0.00000000 |
| H | -4.87925470  | 18.82649262  | 0.00000000 |
| H | -4.92079263  | 23.83126355  | 0.00000000 |
| H | -2.45994155  | -23.84667706 | 0.00000000 |
| H | -2.43926365  | -18.84145388 | 0.00000000 |
| H | -2.43926316  | 18.84145447  | 0.00000000 |
| H | -2.45994110  | 23.84667765  | 0.00000000 |
| H | -0.00002023  | -23.85174977 | 0.00000000 |
| H | -0.00001197  | -18.84648768 | 0.00000000 |
| H | -0.00001137  | 18.84648824  | 0.00000000 |
| H | -0.00001958  | 23.85175039  | 0.00000000 |
| H | 2.45990176   | -23.84668547 | 0.00000000 |
| H | 2.43924015   | -18.84146198 | 0.00000000 |
| H | 2.43924091   | 18.84146246  | 0.00000000 |
| H | 2.45990266   | 23.84668607  | 0.00000000 |
| H | 4.92075500   | -23.83127951 | 0.00000000 |
| H | 4.87923290   | -18.82650784 | 0.00000000 |
| H | 4.87923384   | 18.82650824  | 0.00000000 |
| H | 4.92075616   | 23.83128005  | 0.00000000 |
| H | 7.38528795   | -23.80500127 | 0.00000000 |
| H | 7.32038655   | -18.80102286 | 0.00000000 |

|   |             |              |            |
|---|-------------|--------------|------------|
| H | 7.32038765  | 18.80102313  | 0.00000000 |
| H | 7.38528933  | 23.80500167  | 0.00000000 |
| H | 9.86673200  | -23.74970240 | 0.00000000 |
| H | 9.72673512  | -18.76632955 | 0.00000000 |
| H | 9.72673631  | 18.76632972  | 0.00000000 |
| H | 9.86673353  | 23.74970262  | 0.00000000 |
| H | 11.40955922 | -17.79703208 | 0.00000000 |
| H | 11.40956056 | 17.79703212  | 0.00000000 |
| H | 12.27089309 | -23.72239060 | 0.00000000 |
| H | 12.27089471 | 23.72239064  | 0.00000000 |
| H | 12.64805697 | -15.73356415 | 0.00000000 |
| H | 12.64805822 | 15.73356420  | 0.00000000 |
| H | 13.89560122 | -13.63544959 | 0.00000000 |
| H | 13.89560235 | 13.63544972  | 0.00000000 |
| H | 14.41806840 | -22.48609957 | 0.00000000 |
| H | 14.41806996 | 22.48609947  | 0.00000000 |
| H | 15.13278393 | -11.53309986 | 0.00000000 |
| H | 15.13278491 | 11.53310014  | 0.00000000 |
| H | 15.64896560 | -20.42070837 | 0.00000000 |
| H | 15.64896703 | 20.42070821  | 0.00000000 |
| H | 16.36010822 | -9.42618927  | 0.00000000 |
| H | 16.36010903 | 9.42618975   | 0.00000000 |
| H | 16.94261803 | -18.30258620 | 0.00000000 |
| H | 16.94261930 | 18.30258605  | 0.00000000 |
| H | 17.57766634 | -7.31383666  | 0.00000000 |
| H | 17.57766696 | 7.31383737   | 0.00000000 |
| H | 18.20296413 | -16.18402308 | 0.00000000 |
| H | 18.20296522 | 16.18402299  | 0.00000000 |
| H | 18.78585117 | -5.19532440  | 0.00000000 |
| H | 18.78585158 | 5.19532531   | 0.00000000 |
| H | 19.45173657 | -14.06255740 | 0.00000000 |
| H | 19.45173744 | 14.06255743  | 0.00000000 |
| H | 19.98437498 | -3.06981608  | 0.00000000 |
| H | 19.98437521 | 3.06981713   | 0.00000000 |
| H | 20.69046776 | -11.93599913 | 0.00000000 |
| H | 20.69046840 | 11.93599935  | 0.00000000 |
| H | 21.15599140 | -0.96967973  | 0.00000000 |
| H | 21.15599147 | 0.96968082   | 0.00000000 |
| H | 21.91955280 | -9.80360511  | 0.00000000 |
| H | 21.91955321 | 9.80360556   | 0.00000000 |
| H | 23.13910219 | -7.66447123  | 0.00000000 |
| H | 23.13910243 | 7.66447190   | 0.00000000 |
| H | 24.34993299 | -5.51602016  | 0.00000000 |
| H | 24.34993309 | 5.51602101   | 0.00000000 |
| H | 25.54300435 | -3.33731174  | 0.00000000 |
| H | 25.54300437 | 3.33731272   | 0.00000000 |
| H | 26.72008486 | -1.23866118  | 0.00000000 |
| H | 26.72008487 | 1.23866223   | 0.00000000 |

## 12-HGQR (singlet)

|   |              |              |            |
|---|--------------|--------------|------------|
| C | -28.23372305 | -0.68015806  | 0.00000000 |
| C | -28.23372347 | 0.68014645   | 0.00000000 |
| C | -27.03410550 | -2.81603812  | 0.00000000 |
| C | -27.01830760 | -1.42925313  | 0.00000000 |
| C | -27.01830841 | 1.42924215   | 0.00000000 |
| C | -27.03410710 | 2.81602728   | 0.00000000 |
| C | -25.85114554 | -4.97922560  | 0.00000000 |
| C | -25.85362906 | -3.58159961  | 0.00000000 |
| C | -25.75877588 | -0.72538569  | 0.00000000 |
| C | -25.75877628 | 0.72537526   | 0.00000000 |
| C | -25.85363087 | 3.58158936   | 0.00000000 |
| C | -25.85114807 | 4.97921564   | 0.00000000 |
| C | -24.64571248 | -7.12239134  | 0.00000000 |
| C | -24.66221483 | -5.71971034  | 0.00000000 |
| C | -24.59185800 | -2.87736527  | 0.00000000 |
| C | -24.59383863 | -1.47090297  | 0.00000000 |
| C | -24.59383932 | 1.47089310   | 0.00000000 |
| C | -24.59185932 | 2.87735547   | 0.00000000 |
| C | -24.66221738 | 5.71970100   | 0.00000000 |
| C | -24.64571563 | 7.12238247   | 0.00000000 |
| C | -23.43149120 | -9.25811983  | 0.00000000 |
| C | -23.45559542 | -7.85494267  | 0.00000000 |
| C | -23.39689266 | -5.00762265  | 0.00000000 |
| C | -23.40451008 | -3.60975101  | 0.00000000 |
| C | -23.40451149 | 3.60974176   | 0.00000000 |
| C | -23.39689467 | 5.00761363   | 0.00000000 |
| C | -23.45559837 | 7.85493447   | 0.00000000 |
| C | -23.43149454 | 9.25811224   | 0.00000000 |
| C | -22.20842478 | -11.38764819 | 0.00000000 |
| C | -22.23839531 | -9.98616403  | 0.00000000 |
| C | -22.19153149 | -7.13628356  | 0.00000000 |
| C | -22.20484501 | -5.74158620  | 0.00000000 |
| C | -22.20484694 | 5.74157774   | 0.00000000 |
| C | -22.19153389 | 7.13627553   | 0.00000000 |

|   |              |              |            |
|---|--------------|--------------|------------|
| C | -22.23839828 | 9.98615719   | 0.00000000 |
| C | -22.20842786 | 11.38764208  | 0.00000000 |
| C | -20.97660491 | -13.51169684 | 0.00000000 |
| C | -21.01134187 | -12.11259817 | 0.00000000 |
| C | -20.97645125 | -9.26146967  | 0.00000000 |
| C | -20.99652652 | -7.86661704  | 0.00000000 |
| C | -20.99652870 | 7.86660963   | 0.00000000 |
| C | -20.97645371 | 9.26146287   | 0.00000000 |
| C | -21.01134448 | 12.11259286  | 0.00000000 |
| C | -20.97660735 | 13.51169231  | 0.00000000 |
| C | -19.73597070 | -15.63075367 | 0.00000000 |
| C | -19.77510601 | -14.23362338 | 0.00000000 |
| C | -19.75222016 | -11.38237623 | 0.00000000 |
| C | -19.77959571 | -9.98581720  | 0.00000000 |
| C | -19.77959785 | 9.98581112   | 0.00000000 |
| C | -19.75222234 | 11.38237089  | 0.00000000 |
| C | -19.77510798 | 14.23361966  | 0.00000000 |
| C | -19.73597229 | 15.63075071  | 0.00000000 |
| C | -18.48617983 | -17.74529504 | 0.00000000 |
| C | -18.53022467 | -16.34854601 | 0.00000000 |
| C | -18.51930951 | -13.49829735 | 0.00000000 |
| C | -18.55367345 | -12.09964108 | 0.00000000 |
| C | -18.55367528 | 12.09963654  | 0.00000000 |
| C | -18.51931116 | 13.49829358  | 0.00000000 |
| C | -18.53022585 | 16.34854382  | 0.00000000 |
| C | -18.48618052 | 17.74529355  | 0.00000000 |
| C | -17.22648122 | -19.85617487 | 0.00000000 |
| C | -17.27732781 | -18.45654725 | 0.00000000 |
| C | -17.27842928 | -15.60866790 | 0.00000000 |
| C | -17.31868825 | -14.20859410 | 0.00000000 |
| C | -17.31868956 | 14.20859117  | 0.00000000 |
| C | -17.27843025 | 15.60866566  | 0.00000000 |
| C | -17.27732817 | 18.45654644  | 0.00000000 |
| C | -17.22648109 | 19.85617464  | 0.00000000 |
| C | -15.93979215 | -21.95807997 | 0.00000000 |
| C | -16.01539497 | -20.55328760 | 0.00000000 |
| C | -16.03032521 | -17.71278928 | 0.00000000 |
| C | -16.07476328 | -16.31342314 | 0.00000000 |
| C | -16.07476393 | 16.31342169  | 0.00000000 |
| C | -16.03032545 | 17.71278842  | 0.00000000 |
| C | -16.01539456 | 20.55328792  | 0.00000000 |
| C | -15.93979135 | 21.95808066  | 0.00000000 |
| C | -14.68672987 | -24.06191893 | 0.00000000 |
| C | -14.72952352 | -22.63488379 | 0.00000000 |
| C | -14.77656539 | -19.80932160 | 0.00000000 |
| C | -14.82136212 | -18.41476328 | 0.00000000 |
| C | -14.82136209 | 18.41476308  | 0.00000000 |
| C | -14.77656494 | 19.80932190  | 0.00000000 |
| C | -14.72952242 | 22.63488490  | 0.00000000 |
| C | -14.68672872 | 24.06192027  | 0.00000000 |
| C | -13.50785642 | -24.74021697 | 0.00000000 |
| C | -13.49164428 | -21.89324993 | 0.00000000 |
| C | -13.55776262 | -20.51149619 | 0.00000000 |
| C | -13.55776194 | 20.51149693  | 0.00000000 |
| C | -13.49164293 | 21.89325120  | 0.00000000 |
| C | -13.50785484 | 24.74021867  | 0.00000000 |
| C | -12.25279073 | -24.05984419 | 0.00000000 |
| C | -12.23416454 | -22.61681584 | 0.00000000 |
| C | -12.23416281 | 22.61681744  | 0.00000000 |
| C | -12.25278891 | 24.05984594  | 0.00000000 |
| C | -11.05930595 | -24.76580008 | 0.00000000 |
| C | -11.00644455 | -21.97962315 | 0.00000000 |
| C | -11.00644207 | 21.97962516  | 0.00000000 |
| C | -11.05930379 | 24.76580202  | 0.00000000 |
| C | -9.80687201  | -24.12511282 | 0.00000000 |
| C | -9.78668819  | -22.68009604 | 0.00000000 |
| C | -9.78668545  | 22.68009821  | 0.00000000 |
| C | -9.80686942  | 24.12511500  | 0.00000000 |
| C | -8.59549956  | -24.82160472 | 0.00000000 |
| C | -8.55865129  | -22.01775396 | 0.00000000 |
| C | -8.55864805  | 22.01775631  | 0.00000000 |
| C | -8.59549664  | 24.82160704  | 0.00000000 |
| C | -7.36010500  | -24.16195864 | 0.00000000 |
| C | -7.34401823  | -22.70993790 | 0.00000000 |
| C | -7.34401463  | 22.70994035  | 0.00000000 |
| C | -7.36010156  | 24.16196112  | 0.00000000 |
| C | -6.13777813  | -24.84958596 | 0.00000000 |
| C | -6.11183581  | -22.04509263 | 0.00000000 |
| C | -6.11183176  | 22.04509517  | 0.00000000 |
| C | -6.13777431  | 24.84958857  | 0.00000000 |
| C | -4.90824295  | -24.18571897 | 0.00000000 |
| C | -4.89752570  | -22.73149847 | 0.00000000 |
| C | -4.89752126  | 22.73150111  | 0.00000000 |

|   |             |              |            |
|---|-------------|--------------|------------|
| C | -4.90823861 | 24.18572165  | 0.00000000 |
| C | -3.68208898 | -24.86777345 | 0.00000000 |
| C | -3.66658776 | -22.06306217 | 0.00000000 |
| C | -3.66658289 | 22.06306483  | 0.00000000 |
| C | -3.68208423 | 24.86777624  | 0.00000000 |
| C | -2.45454066 | -24.19985430 | 0.00000000 |
| C | -2.44919014 | -22.74445112 | 0.00000000 |
| C | -2.44918488 | 22.74445386  | 0.00000000 |
| C | -2.45453543 | 24.19985707  | 0.00000000 |
| C | -1.22727859 | -24.87670765 | 0.00000000 |
| C | -1.22212056 | -22.07215818 | 0.00000000 |
| C | -1.22211491 | 22.07216089  | 0.00000000 |
| C | -1.22727293 | 24.87671048  | 0.00000000 |
| C | 0.00000136  | -24.20452865 | 0.00000000 |
| C | 0.00000122  | -22.74880286 | 0.00000000 |
| C | 0.00000724  | 22.74880560  | 0.00000000 |
| C | 0.00000742  | 24.20453139  | 0.00000000 |
| C | 1.22728126  | -24.87670725 | 0.00000000 |
| C | 1.22212270  | -22.07215811 | 0.00000000 |
| C | 1.22212900  | 22.07216078  | 0.00000000 |
| C | 1.22728773  | 24.87670996  | 0.00000000 |
| C | 2.45454294  | -24.19985364 | 0.00000000 |
| C | 2.44919214  | -22.74445085 | 0.00000000 |
| C | 2.44919875  | 22.74445346  | 0.00000000 |
| C | 2.45454966  | 24.19985619  | 0.00000000 |
| C | 3.68209081  | -24.86777232 | 0.00000000 |
| C | 3.66658910  | -22.06306193 | 0.00000000 |
| C | 3.66659585  | 22.06306444  | 0.00000000 |
| C | 3.68209788  | 24.86777473  | 0.00000000 |
| C | 4.90824405  | -24.18571775 | 0.00000000 |
| C | 4.89752655  | -22.73149790 | 0.00000000 |
| C | 4.89753353  | 22.73150025  | 0.00000000 |
| C | 4.90825124  | 24.18571998  | 0.00000000 |
| C | 6.13777859  | -24.84958429 | 0.00000000 |
| C | 6.11183582  | -22.04509211 | 0.00000000 |
| C | 6.11184281  | 22.04509434  | 0.00000000 |
| C | 6.13778606  | 24.84958626  | 0.00000000 |
| C | 7.36010460  | -24.16195699 | 0.00000000 |
| C | 7.34401760  | -22.70993696 | 0.00000000 |
| C | 7.34402475  | 22.70993892  | 0.00000000 |
| C | 7.36011204  | 24.16195876  | 0.00000000 |
| C | 8.59549858  | -24.82160265 | 0.00000000 |
| C | 8.55864986  | -22.01775304 | 0.00000000 |
| C | 8.55865692  | 22.01775487  | 0.00000000 |
| C | 8.59550629  | 24.82160402  | 0.00000000 |
| C | 9.80687017  | -24.12511075 | 0.00000000 |
| C | 9.78668616  | -22.68009464 | 0.00000000 |
| C | 9.78669338  | 22.68009602  | 0.00000000 |
| C | 9.80687772  | 24.12511186  | 0.00000000 |
| C | 11.05930372 | -24.76579753 | 0.00000000 |
| C | 11.00644181 | -21.97962162 | 0.00000000 |
| C | 11.00644877 | 21.97962279  | 0.00000000 |
| C | 11.05931146 | 24.76579803  | 0.00000000 |
| C | 12.25278788 | -24.05984179 | 0.00000000 |
| C | 12.23416123 | -22.61681395 | 0.00000000 |
| C | 12.23416849 | 22.61681441  | 0.00000000 |
| C | 12.25279540 | 24.05984205  | 0.00000000 |
| C | 13.50785308 | -24.74021454 | 0.00000000 |
| C | 13.49164061 | -21.89324816 | 0.00000000 |
| C | 13.55775877 | -20.51149502 | 0.00000000 |
| C | 13.55776638 | 20.51149535  | 0.00000000 |
| C | 13.49164785 | 21.89324833  | 0.00000000 |
| C | 13.50786050 | 24.74021454  | 0.00000000 |
| C | 14.68672613 | -24.06191670 | 0.00000000 |
| C | 14.72951939 | -22.63488200 | 0.00000000 |
| C | 14.77656125 | -19.80932086 | 0.00000000 |
| C | 14.82135777 | -18.41476309 | 0.00000000 |
| C | 14.82136540 | 18.41476384  | 0.00000000 |
| C | 14.77656865 | 19.80932126  | 0.00000000 |
| C | 14.72952642 | 22.63488192  | 0.00000000 |
| C | 14.68673345 | 24.06191643  | 0.00000000 |
| C | 15.93978765 | -21.95807854 | 0.00000000 |
| C | 16.01539047 | -20.55328660 | 0.00000000 |
| C | 16.03032052 | -17.71278946 | 0.00000000 |
| C | 16.07475828 | -16.31342375 | 0.00000000 |
| C | 16.07476564 | 16.31342495  | 0.00000000 |
| C | 16.03032777 | 17.71279020  | 0.00000000 |
| C | 16.01539742 | 20.55328668  | 0.00000000 |
| C | 15.93979436 | 21.95807834  | 0.00000000 |
| C | 17.22647644 | -19.85617438 | 0.00000000 |
| C | 17.27732284 | -18.45654719 | 0.00000000 |
| C | 17.27842398 | -15.60866877 | 0.00000000 |
| C | 17.31868263 | -14.20859513 | 0.00000000 |

|   |              |              |            |
|---|--------------|--------------|------------|
| C | 17.31868950  | 14.20859700  | 0.00000000 |
| C | 17.27843084  | 15.60867009  | 0.00000000 |
| C | 17.27732957  | 18.45654760  | 0.00000000 |
| C | 17.22648298  | 19.85617447  | 0.00000000 |
| C | 18.48617461  | -17.74529537 | 0.00000000 |
| C | 18.53021922  | -16.34854669 | 0.00000000 |
| C | 18.51930376  | -13.49829840 | 0.00000000 |
| C | 18.55366746  | -12.09964185 | 0.00000000 |
| C | 18.55367351  | 12.09964457  | 0.00000000 |
| C | 18.51931001  | 13.49830050  | 0.00000000 |
| C | 18.53022553  | 16.34854761  | 0.00000000 |
| C | 18.48618083  | 17.74529581  | 0.00000000 |
| C | 19.73596524  | -15.63075456 | 0.00000000 |
| C | 19.77510038  | -14.23362437 | 0.00000000 |
| C | 19.75221431  | -11.38237666 | 0.00000000 |
| C | 19.77958978  | -9.98581689  | 0.00000000 |
| C | 19.77959478  | 9.98582061   | 0.00000000 |
| C | 19.75221973  | 11.38237974  | 0.00000000 |
| C | 19.77510610  | 14.23362607  | 0.00000000 |
| C | 19.73597097  | 15.63075563  | 0.00000000 |
| C | 20.97659958  | -13.51169772 | 0.00000000 |
| C | 21.01133650  | -12.11259875 | 0.00000000 |
| C | 20.97644576  | -9.26146866  | 0.00000000 |
| C | 20.99652108  | -7.86661497  | 0.00000000 |
| C | 20.99652489  | 7.86661972   | 0.00000000 |
| C | 20.97645018  | 9.26147279   | 0.00000000 |
| C | 21.01134146  | 12.11260141  | 0.00000000 |
| C | 20.97660473  | 13.51169970  | 0.00000000 |
| C | 22.20842003  | -11.38764825 | 0.00000000 |
| C | 22.23839063  | -9.98616334  | 0.00000000 |
| C | 22.19152672  | -7.13628057  | 0.00000000 |
| C | 22.20484037  | -5.74158207  | 0.00000000 |
| C | 22.20484297  | 5.74158773   | 0.00000000 |
| C | 22.19153002  | 7.13628569   | 0.00000000 |
| C | 22.23839471  | 9.98616705   | 0.00000000 |
| C | 22.20842448  | 11.38765129  | 0.00000000 |
| C | 23.43148732  | -9.25811829  | 0.00000000 |
| C | 23.45559164  | -7.85494008  | 0.00000000 |
| C | 23.39688877  | -5.00761757  | 0.00000000 |
| C | 23.40450633  | -3.60974498  | 0.00000000 |
| C | 23.40450782  | 3.60975125   | 0.00000000 |
| C | 23.39689094  | 5.00762347   | 0.00000000 |
| C | 23.45559476  | 7.85494477   | 0.00000000 |
| C | 23.43149095  | 9.25812242   | 0.00000000 |
| C | 24.64570950  | -7.12238779  | 0.00000000 |
| C | 24.66221193  | -5.71970566  | 0.00000000 |
| C | 24.59185500  | -2.87735849  | 0.00000000 |
| C | 24.59383583  | -1.47089549  | 0.00000000 |
| C | 24.59383637  | 1.47090199   | 0.00000000 |
| C | 24.59185612  | 2.87736480   | 0.00000000 |
| C | 24.66221408  | 5.71971113   | 0.00000000 |
| C | 24.64571222  | 7.12239282   | 0.00000000 |
| C | 25.85114330  | -4.97922014  | 0.00000000 |
| C | 25.85362692  | -3.58159315  | 0.00000000 |
| C | 25.75877369  | -0.72537749  | 0.00000000 |
| C | 25.75877394  | 0.72538384   | 0.00000000 |
| C | 25.85362815  | 3.58159904   | 0.00000000 |
| C | 25.85114510  | 4.97922573   | 0.00000000 |
| C | 27.03410395  | -2.81603121  | 0.00000000 |
| C | 27.01830587  | -1.42924545  | 0.00000000 |
| C | 27.01830634  | 1.42925140   | 0.00000000 |
| C | 27.03410487  | 2.81603700   | 0.00000000 |
| C | 28.23372152  | -0.68014961  | 0.00000000 |
| C | 28.23372173  | 0.68015530   | 0.00000000 |
| H | -29.17986123 | -1.23881430  | 0.00000000 |
| H | -29.17986196 | 1.23880224   | 0.00000000 |
| H | -28.00341129 | -3.33657304  | 0.00000000 |
| H | -28.00341317 | 3.33656184   | 0.00000000 |
| H | -26.81189585 | -5.51511948  | 0.00000000 |
| H | -26.81189868 | 5.51510927   | 0.00000000 |
| H | -25.60330897 | -7.66396243  | 0.00000000 |
| H | -25.60331243 | 7.66395339   | 0.00000000 |
| H | -24.38666628 | -9.80400363  | 0.00000000 |
| H | -24.38666997 | 9.80399592   | 0.00000000 |
| H | -23.61564644 | -0.97032708  | 0.00000000 |
| H | -23.61564685 | 0.97031774   | 0.00000000 |
| H | -23.16121640 | -11.93771512 | 0.00000000 |
| H | -23.16121982 | 11.93770891  | 0.00000000 |
| H | -22.44463104 | -3.07207357  | 0.00000000 |
| H | -22.44463209 | 3.07206475   | 0.00000000 |
| H | -21.92703649 | -14.06583076 | 0.00000000 |
| H | -21.92703923 | 14.06582617  | 0.00000000 |
| H | -21.24755710 | -5.19953720  | 0.00000000 |

|   |              |              |            |
|---|--------------|--------------|------------|
| H | -21.24755866 | 5.19952905   | 0.00000000 |
| H | -20.68404149 | -16.18888233 | 0.00000000 |
| H | -20.68404331 | 16.18887937  | 0.00000000 |
| H | -20.04153026 | -7.32051061  | 0.00000000 |
| H | -20.04153212 | 7.32050336   | 0.00000000 |
| H | -19.43188725 | -18.30736458 | 0.00000000 |
| H | -19.43188808 | 18.30736312  | 0.00000000 |
| H | -18.82687128 | -9.43572580  | 0.00000000 |
| H | -18.82687316 | 9.43571973   | 0.00000000 |
| H | -18.16909371 | -20.42335985 | 0.00000000 |
| H | -18.16909365 | 20.42335966  | 0.00000000 |
| H | -17.60323106 | -11.54561525 | 0.00000000 |
| H | -17.60323269 | 11.54561064  | 0.00000000 |
| H | -16.87398663 | -22.53930951 | 0.00000000 |
| H | -16.87398594 | 22.53931016  | 0.00000000 |
| H | -16.37048607 | -13.65077174 | 0.00000000 |
| H | -16.37048724 | 13.65076872  | 0.00000000 |
| H | -15.64293775 | -24.60312492 | 0.00000000 |
| H | -15.64293678 | 24.60312605  | 0.00000000 |
| H | -15.12876319 | -15.75190096 | 0.00000000 |
| H | -15.12876375 | 15.75189943  | 0.00000000 |
| H | -13.87763293 | -17.84923932 | 0.00000000 |
| H | -13.87763287 | 17.84923904  | 0.00000000 |
| H | -13.49506618 | -25.83887686 | 0.00000000 |
| H | -13.49506450 | 25.83887859  | 0.00000000 |
| H | -12.63643130 | -19.91261704 | 0.00000000 |
| H | -12.63643087 | 19.91261740  | 0.00000000 |
| H | -11.09218699 | -25.86553670 | 0.00000000 |
| H | -10.95188716 | -20.88215925 | 0.00000000 |
| H | -10.95188422 | 20.88216131  | 0.00000000 |
| H | -11.09218495 | 25.86553865  | 0.00000000 |
| H | -8.61185328  | -25.92156249 | 0.00000000 |
| H | -8.54423409  | -20.91766585 | 0.00000000 |
| H | -8.54423076  | 20.91766821  | 0.00000000 |
| H | -8.61185053  | 25.92156479  | 0.00000000 |
| H | -6.14830047  | -25.94964316 | 0.00000000 |
| H | -6.10191127  | -20.94505534 | 0.00000000 |
| H | -6.10190719  | 20.94505792  | 0.00000000 |
| H | -6.14829677  | 25.94964573  | 0.00000000 |
| H | -3.68833891  | -25.96788902 | 0.00000000 |
| H | -3.66064731  | -20.96298293 | 0.00000000 |
| H | -3.66064244  | 20.96298566  | 0.00000000 |
| H | -3.68833424  | 25.96789174  | 0.00000000 |
| H | -1.22934863  | -25.97685565 | 0.00000000 |
| H | -1.22012901  | -20.97204997 | 0.00000000 |
| H | -1.22012341  | 20.97205279  | 0.00000000 |
| H | -1.22934299  | 25.97685839  | 0.00000000 |
| H | 1.22935104   | -25.97685510 | 0.00000000 |
| H | 1.22013047   | -20.97205006 | 0.00000000 |
| H | 1.22013665   | 20.97205287  | 0.00000000 |
| H | 1.22935754   | 25.97685768  | 0.00000000 |
| H | 3.68834065   | -25.96788749 | 0.00000000 |
| H | 3.66064814   | -20.96298310 | 0.00000000 |
| H | 3.66065473   | 20.96298580  | 0.00000000 |
| H | 3.68834782   | 25.96788974  | 0.00000000 |
| H | 6.14830104   | -25.94964097 | 0.00000000 |
| H | 6.10191102   | -20.94505536 | 0.00000000 |
| H | 6.10191781   | 20.94505782  | 0.00000000 |
| H | 6.14830870   | 25.94964276  | 0.00000000 |
| H | 8.61185263   | -25.92155990 | 0.00000000 |
| H | 8.54423252   | -20.91766549 | 0.00000000 |
| H | 8.54423929   | 20.91766759  | 0.00000000 |
| H | 8.61186064   | 25.92156106  | 0.00000000 |
| H | 11.09218502  | -25.86553372 | 0.00000000 |
| H | 10.95188437  | -20.88215827 | 0.00000000 |
| H | 10.95189068  | 20.88215980  | 0.00000000 |
| H | 11.09219302  | 25.86553402  | 0.00000000 |
| H | 12.63642790  | -19.91261612 | 0.00000000 |
| H | 12.63643591  | 19.91261649  | 0.00000000 |
| H | 13.49506276  | -25.83887406 | 0.00000000 |
| H | 13.49507006  | 25.83887387  | 0.00000000 |
| H | 13.87762900  | -17.84923931 | 0.00000000 |
| H | 13.87763691  | 17.84924037  | 0.00000000 |
| H | 15.12875857  | -15.75190162 | 0.00000000 |
| H | 15.12876627  | 15.75190318  | 0.00000000 |
| H | 15.64293385  | -24.60312230 | 0.00000000 |
| H | 15.64294117  | 24.60312153  | 0.00000000 |
| H | 16.37048076  | -13.65077256 | 0.00000000 |
| H | 16.37048803  | 13.65077474  | 0.00000000 |
| H | 16.87398182  | -22.53930794 | 0.00000000 |
| H | 16.87398826  | 22.53930758  | 0.00000000 |
| H | 17.60322517  | -11.54561557 | 0.00000000 |
| H | 17.60323165  | 11.54561854  | 0.00000000 |

|   |             |              |            |
|---|-------------|--------------|------------|
| H | 18.16908859 | -20.42335920 | 0.00000000 |
| H | 18.16909470 | 20.42335923  | 0.00000000 |
| H | 18.82686512 | -9.43572492  | 0.00000000 |
| H | 18.82687052 | 9.43572885   | 0.00000000 |
| H | 19.43188189 | -18.30736456 | 0.00000000 |
| H | 19.43188767 | 18.30736483  | 0.00000000 |
| H | 20.04152428 | -7.32050803  | 0.00000000 |
| H | 20.04152838 | 7.32051300   | 0.00000000 |
| H | 20.68403615 | -16.18888278 | 0.00000000 |
| H | 20.68404146 | 16.18888357  | 0.00000000 |
| H | 21.24755170 | -5.19953275  | 0.00000000 |
| H | 21.24755446 | 5.19953862   | 0.00000000 |
| H | 21.92703161 | -14.06583121 | 0.00000000 |
| H | 21.92703640 | 14.06583279  | 0.00000000 |
| H | 22.44462651 | -3.07206730  | 0.00000000 |
| H | 22.44462805 | 3.07207378   | 0.00000000 |
| H | 23.16121235 | -11.93771493 | 0.00000000 |
| H | 23.16121652 | 11.93771754  | 0.00000000 |
| H | 23.61564288 | -0.97031957  | 0.00000000 |
| H | 23.61564341 | 0.97032618   | 0.00000000 |
| H | 24.38666322 | -9.80400214  | 0.00000000 |
| H | 24.38666666 | 9.80400581   | 0.00000000 |
| H | 25.60330675 | -7.66395917  | 0.00000000 |
| H | 25.60330938 | 7.66396377   | 0.00000000 |
| H | 26.81189419 | -5.51511453  | 0.00000000 |
| H | 26.81189601 | 5.51511968   | 0.00000000 |
| H | 28.00341024 | -3.33656645  | 0.00000000 |
| H | 28.00341125 | 3.33657186   | 0.00000000 |
| H | 29.17986033 | -1.23880575  | 0.00000000 |
| H | 29.17986072 | 1.23881107   | 0.00000000 |

## 13-HGQR (singlet)

|   |              |              |            |
|---|--------------|--------------|------------|
| C | -30.69565596 | -0.68010721  | 0.00000000 |
| C | -30.69565681 | 0.68006099   | 0.00000000 |
| C | -29.49638371 | -2.81569843  | 0.00000000 |
| C | -29.48014375 | -1.42911842  | 0.00000000 |
| C | -29.48014560 | 1.42907391   | 0.00000000 |
| C | -29.49638674 | 2.81565455   | 0.00000000 |
| C | -28.31456376 | -4.97902478  | 0.00000000 |
| C | -28.31608795 | -3.58161011  | 0.00000000 |
| C | -28.22034806 | -0.72551243  | 0.00000000 |
| C | -28.22034892 | 0.72546944   | 0.00000000 |
| C | -28.31609143 | 3.58156828   | 0.00000000 |
| C | -28.31456786 | 4.97898406   | 0.00000000 |
| C | -27.11085888 | -7.12275432  | 0.00000000 |
| C | -27.12603696 | -5.72017210  | 0.00000000 |
| C | -27.05396796 | -2.87796420  | 0.00000000 |
| C | -27.05564428 | -1.47128409  | 0.00000000 |
| C | -27.05564577 | 1.47124283   | 0.00000000 |
| C | -27.05397061 | 2.87792361   | 0.00000000 |
| C | -27.12604103 | 5.72013423   | 0.00000000 |
| C | -27.11086294 | 7.12271819   | 0.00000000 |
| C | -25.89887810 | -9.25945325  | 0.00000000 |
| C | -25.92140212 | -7.85610019  | 0.00000000 |
| C | -25.86023824 | -5.00904872  | 0.00000000 |
| C | -25.86705926 | -3.61098692  | 0.00000000 |
| C | -25.86706219 | 3.61094874   | 0.00000000 |
| C | -25.86024162 | 5.00901200   | 0.00000000 |
| C | -25.92140562 | 7.85606777   | 0.00000000 |
| C | -25.89888098 | 9.25942336   | 0.00000000 |
| C | -24.67855145 | -11.39035825 | 0.00000000 |
| C | -24.70682231 | -9.98827948  | 0.00000000 |
| C | -24.65676243 | -7.13881011  | 0.00000000 |
| C | -24.66876477 | -5.74407276  | 0.00000000 |
| C | -24.66876799 | 5.74403906   | 0.00000000 |
| C | -24.65676530 | 7.13877878   | 0.00000000 |
| C | -24.70682419 | 9.98825415   | 0.00000000 |
| C | -24.67855216 | 11.39033623  | 0.00000000 |
| C | -23.45003418 | -13.51611783 | 0.00000000 |
| C | -23.48302593 | -12.11603876 | 0.00000000 |
| C | -23.44419573 | -9.26535418  | 0.00000000 |
| C | -23.46237642 | -7.87078118  | 0.00000000 |
| C | -23.46237867 | 7.87075369   | 0.00000000 |
| C | -23.44419695 | 9.26532988   | 0.00000000 |
| C | -23.48302533 | 12.11602184  | 0.00000000 |
| C | -23.45003208 | 13.51610466  | 0.00000000 |
| C | -22.21345818 | -15.63705679 | 0.00000000 |
| C | -22.25063854 | -14.23900124 | 0.00000000 |
| C | -22.22301301 | -11.38792200 | 0.00000000 |
| C | -22.24793929 | -9.99209213  | 0.00000000 |
| C | -22.24793945 | 9.99207248   | 0.00000000 |
| C | -22.22301172 | 11.38790605  | 0.00000000 |
| C | -22.25063507 | 14.23899320  | 0.00000000 |
| C | -22.21345317 | 15.63705242  | 0.00000000 |

|   |              |              |            |
|---|--------------|--------------|------------|
| C | -20.96880873 | -17.75341907 | 0.00000000 |
| C | -21.01006515 | -16.35685616 | 0.00000000 |
| C | -20.99347946 | -13.50595389 | 0.00000000 |
| C | -21.02509298 | -12.10836285 | 0.00000000 |
| C | -21.02509038 | 12.10835202  | 0.00000000 |
| C | -20.99347535 | 13.50594680  | 0.00000000 |
| C | -21.01005901 | 16.35685640  | 0.00000000 |
| C | -20.96880130 | 17.75342248  | 0.00000000 |
| C | -19.71577241 | -19.86559338 | 0.00000000 |
| C | -19.76165218 | -18.46907475 | 0.00000000 |
| C | -19.75598981 | -15.61915559 | 0.00000000 |
| C | -19.79378868 | -14.21983698 | 0.00000000 |
| C | -19.79378330 | 14.21983493  | 0.00000000 |
| C | -19.75598315 | 15.61915680  | 0.00000000 |
| C | -19.76164395 | 18.46908189  | 0.00000000 |
| C | -19.71576324 | 19.86560303  | 0.00000000 |
| C | -18.45360285 | -21.97444608 | 0.00000000 |
| C | -18.50593564 | -20.57489149 | 0.00000000 |
| C | -18.51122954 | -17.72721559 | 0.00000000 |
| C | -18.55417150 | -16.32687171 | 0.00000000 |
| C | -18.55416382 | 16.32687729  | 0.00000000 |
| C | -18.51122092 | 17.72722365  | 0.00000000 |
| C | -18.50592587 | 20.57490394  | 0.00000000 |
| C | -18.45359236 | 21.97446041  | 0.00000000 |
| C | -17.16527870 | -24.07471704 | 0.00000000 |
| C | -17.24187345 | -22.66996447 | 0.00000000 |
| C | -17.25994945 | -19.82953915 | 0.00000000 |
| C | -17.30643831 | -18.43014976 | 0.00000000 |
| C | -17.30642905 | 18.43016123  | 0.00000000 |
| C | -17.25993946 | 19.82955228  | 0.00000000 |
| C | -17.24186239 | 22.66998072  | 0.00000000 |
| C | -17.16526699 | 24.07473450  | 0.00000000 |
| C | -15.91155309 | -26.17755127 | 0.00000000 |
| C | -15.95469246 | -24.75049972 | 0.00000000 |
| C | -16.00374286 | -21.92479705 | 0.00000000 |
| C | -16.05004314 | -20.53030580 | 0.00000000 |
| C | -16.05003277 | 20.53032126  | 0.00000000 |
| C | -16.00373172 | 21.92481360  | 0.00000000 |
| C | -15.95468014 | 24.75051867  | 0.00000000 |
| C | -15.91154051 | 26.17757040  | 0.00000000 |
| C | -14.73256662 | -26.85534033 | 0.00000000 |
| C | -14.71721525 | -24.00797202 | 0.00000000 |
| C | -14.78427768 | -22.62630461 | 0.00000000 |
| C | -14.78426624 | 22.62632249  | 0.00000000 |
| C | -14.71720311 | 24.00799063  | 0.00000000 |
| C | -14.73255285 | 26.85535955  | 0.00000000 |
| C | -13.47780877 | -26.17434021 | 0.00000000 |
| C | -13.45926317 | -24.73119621 | 0.00000000 |
| C | -13.45925051 | 24.73121473  | 0.00000000 |
| C | -13.47779555 | 26.17435848  | 0.00000000 |
| C | -12.28452961 | -26.88021008 | 0.00000000 |
| C | -12.23160709 | -24.09396545 | 0.00000000 |
| C | -12.23159454 | 24.09398372  | 0.00000000 |
| C | -12.28451566 | 26.88022730  | 0.00000000 |
| C | -11.03209668 | -26.23948368 | 0.00000000 |
| C | -11.01158193 | -24.79445356 | 0.00000000 |
| C | -11.01156897 | 24.79447100  | 0.00000000 |
| C | -11.03208306 | 26.23950048  | 0.00000000 |
| C | -9.82126694  | -26.93644471 | 0.00000000 |
| C | -9.78332572  | -24.13254933 | 0.00000000 |
| C | -9.78331335  | 24.13256669  | 0.00000000 |
| C | -9.82125334  | 26.93646078  | 0.00000000 |
| C | -8.58566525  | -26.27721826 | 0.00000000 |
| C | -8.56875459  | -24.82526524 | 0.00000000 |
| C | -8.56874223  | 24.82528163  | 0.00000000 |
| C | -8.58565239  | 26.27723394  | 0.00000000 |
| C | -7.36402823  | -26.96578445 | 0.00000000 |
| C | -7.33599653  | -24.16128576 | 0.00000000 |
| C | -7.33598495  | 24.16130225  | 0.00000000 |
| C | -7.36401575  | 26.96579962  | 0.00000000 |
| C | -6.13424849  | -26.30272531 | 0.00000000 |
| C | -6.12219206  | -24.84869148 | 0.00000000 |
| C | -6.12218090  | 24.84870716  | 0.00000000 |
| C | -6.13423701  | 26.30274027  | 0.00000000 |
| C | -4.90873887  | -26.98618197 | 0.00000000 |
| C | -4.89014171  | -24.18155339 | 0.00000000 |
| C | -4.89013135  | 24.18156938  | 0.00000000 |
| C | -4.90872807  | 26.98619664  | 0.00000000 |
| C | -3.68109258  | -26.31949832 | 0.00000000 |
| C | -3.67387632  | -24.86439038 | 0.00000000 |
| C | -3.67386678  | 24.86440572  | 0.00000000 |
| C | -3.68108289  | 26.31951294  | 0.00000000 |
| C | -2.45424208  | -26.99818176 | 0.00000000 |

|   |             |              |            |
|---|-------------|--------------|------------|
| C | -2.44496719 | -24.19386998 | 0.00000000 |
| C | -2.44495862 | 24.19388576  | 0.00000000 |
| C | -2.45423334 | 26.99819625  | 0.00000000 |
| C | -1.22710849 | -26.32777438 | 0.00000000 |
| C | -1.22470618 | -24.87233075 | 0.00000000 |
| C | -1.22469871 | 24.87234601  | 0.00000000 |
| C | -1.22710096 | 26.32778884  | 0.00000000 |
| C | -0.00000553 | -27.00214369 | 0.00000000 |
| C | -0.00000590 | -24.19800284 | 0.00000000 |
| C | 0.00000040  | 24.19801860  | 0.00000000 |
| C | 0.00000082  | 27.00215807  | 0.00000000 |
| C | 1.22709739  | -26.32777406 | 0.00000000 |
| C | 1.22469470  | -24.87233043 | 0.00000000 |
| C | 1.22469980  | 24.87234568  | 0.00000000 |
| C | 1.22710250  | 26.32778846  | 0.00000000 |
| C | 2.45423137  | -26.99818113 | 0.00000000 |
| C | 2.44495578  | -24.19386935 | 0.00000000 |
| C | 2.44495962  | 24.19388515  | 0.00000000 |
| C | 2.45423516  | 26.99819545  | 0.00000000 |
| C | 3.68108213  | -26.31949741 | 0.00000000 |
| C | 3.67386553  | -24.86438942 | 0.00000000 |
| C | 3.67386823  | 24.86440472  | 0.00000000 |
| C | 3.68108476  | 26.31951183  | 0.00000000 |
| C | 4.90872911  | -26.98618075 | 0.00000000 |
| C | 4.89013132  | -24.18155218 | 0.00000000 |
| C | 4.89013290  | 24.18156814  | 0.00000000 |
| C | 4.90873036  | 26.98619509  | 0.00000000 |
| C | 6.13423918  | -26.30272385 | 0.00000000 |
| C | 6.12218247  | -24.84868998 | 0.00000000 |
| C | 6.12218294  | 24.84870553  | 0.00000000 |
| C | 6.13423943  | 26.30273848  | 0.00000000 |
| C | 7.36401973  | -26.96578275 | 0.00000000 |
| C | 7.33598754  | -24.16128402 | 0.00000000 |
| C | 7.33598719  | 24.16130043  | 0.00000000 |
| C | 7.36401865  | 26.96579743  | 0.00000000 |
| C | 8.58565728  | -26.27721638 | 0.00000000 |
| C | 8.56874640  | -24.82526327 | 0.00000000 |
| C | 8.56874493  | 24.82527943  | 0.00000000 |
| C | 8.58565540  | 26.27723156  | 0.00000000 |
| C | 9.82125974  | -26.93644264 | 0.00000000 |
| C | 9.78331818  | -24.13254718 | 0.00000000 |
| C | 9.78331624  | 24.13256432  | 0.00000000 |
| C | 9.82125681  | 26.93645803  | 0.00000000 |
| C | 11.03209003 | -26.23948149 | 0.00000000 |
| C | 11.01157518 | -24.79445125 | 0.00000000 |
| C | 11.01157227 | 24.79446826  | 0.00000000 |
| C | 11.03208660 | 26.23949756  | 0.00000000 |
| C | 12.28452359 | -26.88020779 | 0.00000000 |
| C | 12.23160092 | -24.09396296 | 0.00000000 |
| C | 12.23159795 | 24.09398079  | 0.00000000 |
| C | 12.28451954 | 26.88022399  | 0.00000000 |
| C | 13.47780337 | -26.17433778 | 0.00000000 |
| C | 13.45925783 | -24.73119353 | 0.00000000 |
| C | 13.45925431 | 24.73121139  | 0.00000000 |
| C | 13.47779955 | 26.17435507  | 0.00000000 |
| C | 14.73256150 | -26.85533801 | 0.00000000 |
| C | 14.71721034 | -24.00796904 | 0.00000000 |
| C | 14.78427324 | -22.62630095 | 0.00000000 |
| C | 14.78427048 | 22.62631889  | 0.00000000 |
| C | 14.71720703 | 24.00798710  | 0.00000000 |
| C | 14.73255682 | 26.85535611  | 0.00000000 |
| C | 15.91154854 | -26.17754857 | 0.00000000 |
| C | 15.95468787 | -24.75049671 | 0.00000000 |
| C | 16.00373884 | -21.92479281 | 0.00000000 |
| C | 16.05003952 | -20.53030083 | 0.00000000 |
| C | 16.05003738 | 20.53031759  | 0.00000000 |
| C | 16.00373603 | 21.92480993  | 0.00000000 |
| C | 15.95468397 | 24.75051508  | 0.00000000 |
| C | 15.91154458 | 26.17756676  | 0.00000000 |
| C | 17.16527457 | -24.07471347 | 0.00000000 |
| C | 17.24186964 | -22.66996032 | 0.00000000 |
| C | 17.25994636 | -19.82953348 | 0.00000000 |
| C | 17.30643570 | -18.43014329 | 0.00000000 |
| C | 17.30643397 | 18.43015759  | 0.00000000 |
| C | 17.25994409 | 19.82954857  | 0.00000000 |
| C | 17.24186646 | 22.66997695  | 0.00000000 |
| C | 17.16527079 | 24.07473074  | 0.00000000 |
| C | 18.45359948 | -21.97444136 | 0.00000000 |
| C | 18.50593273 | -20.57488602 | 0.00000000 |
| C | 18.51122754 | -17.72720840 | 0.00000000 |
| C | 18.55417002 | -16.32686365 | 0.00000000 |
| C | 18.55416896 | 16.32687394  | 0.00000000 |
| C | 18.51122579 | 17.72722011  | 0.00000000 |

|   |              |              |            |
|---|--------------|--------------|------------|
| C | 18.50593016  | 20.57490017  | 0.00000000 |
| C | 18.45359638  | 21.97445664  | 0.00000000 |
| C | 19.71577006  | -19.86558731 | 0.00000000 |
| C | 19.76165038  | -18.46906783 | 0.00000000 |
| C | 19.75598897  | -15.61914692 | 0.00000000 |
| C | 19.79378832  | -14.21982748 | 0.00000000 |
| C | 19.79378843  | 14.21983227  | 0.00000000 |
| C | 19.75598812  | 15.61915378  | 0.00000000 |
| C | 19.76164838  | 18.46907831  | 0.00000000 |
| C | 19.71576743  | 19.86559931  | 0.00000000 |
| C | 20.96880758  | -17.75341156 | 0.00000000 |
| C | 21.01006453  | -16.35684783 | 0.00000000 |
| C | 20.99347967  | -13.50594399 | 0.00000000 |
| C | 21.02509353  | -12.10835229 | 0.00000000 |
| C | 21.02509521  | 12.10835059  | 0.00000000 |
| C | 20.99348018  | 13.50594477  | 0.00000000 |
| C | 21.01006350  | 16.35685335  | 0.00000000 |
| C | 20.96880561  | 17.75341909  | 0.00000000 |
| C | 22.21345822  | -15.63704794 | 0.00000000 |
| C | 22.25063901  | -14.23899172 | 0.00000000 |
| C | 22.22301402  | -11.38791133 | 0.00000000 |
| C | 22.24794047  | -9.99208105  | 0.00000000 |
| C | 22.24794364  | 9.99207276   | 0.00000000 |
| C | 22.22301612  | 11.38790552  | 0.00000000 |
| C | 22.25063941  | 14.23899117  | 0.00000000 |
| C | 22.21345746  | 15.63704979  | 0.00000000 |
| C | 23.45003525  | -13.51610799 | 0.00000000 |
| C | 23.48302722  | -12.11602847 | 0.00000000 |
| C | 23.44419721  | -9.26534325  | 0.00000000 |
| C | 23.46237789  | -7.87077012  | 0.00000000 |
| C | 23.46238201  | 7.87075597   | 0.00000000 |
| C | 23.44420065  | 9.26533121   | 0.00000000 |
| C | 23.48302926  | 12.11602132  | 0.00000000 |
| C | 23.45003612  | 13.51610331  | 0.00000000 |
| C | 24.67855320  | -11.39034789 | 0.00000000 |
| C | 24.70682409  | -9.98826889  | 0.00000000 |
| C | 24.65676408  | -7.13879936  | 0.00000000 |
| C | 24.66876625  | -5.74406213  | 0.00000000 |
| C | 24.66877043  | 5.74404333   | 0.00000000 |
| C | 24.65676816  | 7.13878212   | 0.00000000 |
| C | 24.70682750  | 9.98825551   | 0.00000000 |
| C | 24.67855571  | 11.39033664  | 0.00000000 |
| C | 25.89888015  | -9.25944283  | 0.00000000 |
| C | 25.92140403  | -7.85608972  | 0.00000000 |
| C | 25.86023981  | -5.00903845  | 0.00000000 |
| C | 25.86706060  | -3.61097692  | 0.00000000 |
| C | 25.86706386  | 3.61095475   | 0.00000000 |
| C | 25.86024366  | 5.00901722   | 0.00000000 |
| C | 25.92140819  | 7.85607114   | 0.00000000 |
| C | 25.89888386  | 9.25942580   | 0.00000000 |
| C | 27.11086091  | -7.12274417  | 0.00000000 |
| C | 27.12603875  | -5.72016202  | 0.00000000 |
| C | 27.05396929  | -2.87795463  | 0.00000000 |
| C | 27.05564544  | -1.47127485  | 0.00000000 |
| C | 27.05564690  | 1.47125021   | 0.00000000 |
| C | 27.05397197  | 2.87793043   | 0.00000000 |
| C | 27.12604287  | 5.72013948   | 0.00000000 |
| C | 27.11086510  | 7.12272264   | 0.00000000 |
| C | 28.31456554  | -4.97901510  | 0.00000000 |
| C | 28.31608945  | -3.58160059  | 0.00000000 |
| C | 28.22034915  | -0.72550378  | 0.00000000 |
| C | 28.22034993  | 0.72547766   | 0.00000000 |
| C | 28.31609270  | 3.58157511   | 0.00000000 |
| C | 28.31456937  | 4.97899024   | 0.00000000 |
| C | 29.49638517  | -2.81568931  | 0.00000000 |
| C | 29.48014486  | -1.42910963  | 0.00000000 |
| C | 29.48014651  | 1.42908204   | 0.00000000 |
| C | 29.49638783  | 2.81566209   | 0.00000000 |
| C | 30.69565688  | -0.68009836  | 0.00000000 |
| C | 30.69565759  | 0.68006927   | 0.00000000 |
| H | -31.64174736 | -1.23887227  | 0.00000000 |
| H | -31.64174899 | 1.23882450   | 0.00000000 |
| H | -30.46581749 | -3.33600910  | 0.00000000 |
| H | -30.46582100 | 3.33596376   | 0.00000000 |
| H | -29.27563773 | -5.51435321  | 0.00000000 |
| H | -29.27564221 | 5.51431076   | 0.00000000 |
| H | -28.06892067 | -7.66351529  | 0.00000000 |
| H | -28.06892491 | 7.66347727   | 0.00000000 |
| H | -26.85467133 | -9.80427230  | 0.00000000 |
| H | -26.85467416 | 9.80424048   | 0.00000000 |
| H | -26.07734679 | -0.97086131  | 0.00000000 |
| H | -26.07734819 | 0.97082049   | 0.00000000 |
| H | -25.63212855 | -11.93909212 | 0.00000000 |

|   |              |              |            |
|---|--------------|--------------|------------|
| H | -25.63212893 | 11.93906834  | 0.00000000 |
| H | -24.90685321 | -3.07387466  | 0.00000000 |
| H | -24.90685624 | 3.07383705   | 0.00000000 |
| H | -24.40143853 | -14.06862734 | 0.00000000 |
| H | -24.40143583 | 14.06861271  | 0.00000000 |
| H | -23.71098860 | -5.20286667  | 0.00000000 |
| H | -23.71099229 | 5.20283342   | 0.00000000 |
| H | -23.16270329 | -16.19324877 | 0.00000000 |
| H | -23.16269748 | 16.19324329  | 0.00000000 |
| H | -22.50673499 | -7.32578029  | 0.00000000 |
| H | -22.50673792 | 7.32575338   | 0.00000000 |
| H | -21.91588495 | -18.31324994 | 0.00000000 |
| H | -21.91587661 | 18.31325256  | 0.00000000 |
| H | -21.29441823 | -9.44334801  | 0.00000000 |
| H | -21.29441912 | 9.44332925   | 0.00000000 |
| H | -20.66067315 | -20.42902918 | 0.00000000 |
| H | -20.66066308 | 20.42903831  | 0.00000000 |
| H | -20.07371585 | -11.55589233 | 0.00000000 |
| H | -20.07371387 | 11.55588278  | 0.00000000 |
| H | -19.39559443 | -22.54267471 | 0.00000000 |
| H | -19.39558311 | 22.54268875  | 0.00000000 |
| H | -18.84453933 | -13.66373470 | 0.00000000 |
| H | -18.84453441 | 13.66373424  | 0.00000000 |
| H | -18.09909964 | -24.65655699 | 0.00000000 |
| H | -18.09908752 | 24.65657380  | 0.00000000 |
| H | -17.60698492 | -15.76730251 | 0.00000000 |
| H | -17.60697760 | 15.76730980  | 0.00000000 |
| H | -16.86765628 | -26.71897031 | 0.00000000 |
| H | -16.86764340 | 26.71898866  | 0.00000000 |
| H | -16.36126148 | -17.86722286 | 0.00000000 |
| H | -16.36125257 | 17.86723586  | 0.00000000 |
| H | -15.10693345 | -19.96373033 | 0.00000000 |
| H | -15.10692358 | 19.96374686  | 0.00000000 |
| H | -14.71921322 | -27.95400755 | 0.00000000 |
| H | -14.71919784 | 27.95402615  | 0.00000000 |
| H | -13.86326938 | -22.02688008 | 0.00000000 |
| H | -13.86325844 | 22.02689881  | 0.00000000 |
| H | -12.31732824 | -27.97995551 | 0.00000000 |
| H | -12.17721640 | -22.99646657 | 0.00000000 |
| H | -12.17720450 | 22.99648562  | 0.00000000 |
| H | -12.31731326 | 27.97997217  | 0.00000000 |
| H | -9.83803949  | -28.03640317 | 0.00000000 |
| H | -9.76848841  | -23.03245660 | 0.00000000 |
| H | -9.76847657  | 23.03247485  | 0.00000000 |
| H | -9.83802532  | 28.03641867  | 0.00000000 |
| H | -7.37534456  | -28.06583964 | 0.00000000 |
| H | -7.32523751  | -23.06124566 | 0.00000000 |
| H | -7.32522622  | 23.06126310  | 0.00000000 |
| H | -7.37533162  | 28.06585426  | 0.00000000 |
| H | -4.91617602  | -28.08629828 | 0.00000000 |
| H | -4.88296501  | -23.08146889 | 0.00000000 |
| H | -4.88295475  | 23.08148584  | 0.00000000 |
| H | -4.91616495  | 28.08631245  | 0.00000000 |
| H | -2.45792006  | -28.09833936 | 0.00000000 |
| H | -2.44134930  | -23.09374795 | 0.00000000 |
| H | -2.44134076  | 23.09376472  | 0.00000000 |
| H | -2.45791123  | 28.09835338  | 0.00000000 |
| H | -0.00000549  | -28.10231626 | 0.00000000 |
| H | -0.00000615  | -23.09786645 | 0.00000000 |
| H | 0.00000010   | 23.09788322  | 0.00000000 |
| H | 0.00000082   | 28.10233018  | 0.00000000 |
| H | 2.45790947   | -28.09833867 | 0.00000000 |
| H | 2.44133745   | -23.09374737 | 0.00000000 |
| H | 2.44134121   | 23.09376423  | 0.00000000 |
| H | 2.45791313   | 28.09835246  | 0.00000000 |
| H | 4.91616643   | -28.08629697 | 0.00000000 |
| H | 4.88295432   | -23.08146776 | 0.00000000 |
| H | 4.88295588   | 23.08148484  | 0.00000000 |
| H | 4.91616741   | 28.08631069  | 0.00000000 |
| H | 7.37533627   | -28.06583783 | 0.00000000 |
| H | 7.32522835   | -23.06124401 | 0.00000000 |
| H | 7.32522820   | 23.06126157  | 0.00000000 |
| H | 7.37533476   | 28.06585181  | 0.00000000 |
| H | 9.83803251   | -28.03640102 | 0.00000000 |
| H | 9.76848075   | -23.03245453 | 0.00000000 |
| H | 9.76847923   | 23.03247279  | 0.00000000 |
| H | 9.83802909   | 28.03641565  | 0.00000000 |
| H | 12.31732225  | -27.97995318 | 0.00000000 |
| H | 12.17720993  | -22.99646417 | 0.00000000 |
| H | 12.17720751  | 22.99648305  | 0.00000000 |
| H | 12.31731728  | 27.97996864  | 0.00000000 |
| H | 13.86326515  | -22.02687619 | 0.00000000 |
| H | 13.86326308  | 22.02689522  | 0.00000000 |

|   |             |              |            |
|---|-------------|--------------|------------|
| H | 14.71920798 | -27.95400521 | 0.00000000 |
| H | 14.71920163 | 27.95402249  | 0.00000000 |
| H | 15.10692988 | -19.96372527 | 0.00000000 |
| H | 15.10692853 | 19.96374335  | 0.00000000 |
| H | 16.36125890 | -17.86721624 | 0.00000000 |
| H | 16.36125787 | 17.86723237  | 0.00000000 |
| H | 16.86765185 | -26.71896740 | 0.00000000 |
| H | 16.86764743 | 26.71898463  | 0.00000000 |
| H | 17.60698348 | -15.76729416 | 0.00000000 |
| H | 17.60698320 | 15.76730645  | 0.00000000 |
| H | 18.09909558 | -24.65655334 | 0.00000000 |
| H | 18.09909108 | 24.65656991  | 0.00000000 |
| H | 18.84453897 | -13.66372477 | 0.00000000 |
| H | 18.84454003 | 13.66373144  | 0.00000000 |
| H | 19.39559106 | -22.54267004 | 0.00000000 |
| H | 19.39558672 | 22.54268498  | 0.00000000 |
| H | 20.07371633 | -11.55588127 | 0.00000000 |
| H | 20.07371914 | 11.55588111  | 0.00000000 |
| H | 20.66067084 | -20.42902317 | 0.00000000 |
| H | 20.66066686 | 20.42903453  | 0.00000000 |
| H | 21.29441923 | -9.44333648  | 0.00000000 |
| H | 21.29442364 | 9.44332926   | 0.00000000 |
| H | 21.91588391 | -18.31324249 | 0.00000000 |
| H | 21.91588053 | 18.31324906  | 0.00000000 |
| H | 22.50673617 | -7.32576892  | 0.00000000 |
| H | 22.50674144 | 7.32575544   | 0.00000000 |
| H | 23.16270357 | -16.19323998 | 0.00000000 |
| H | 23.16270148 | 16.19324047  | 0.00000000 |
| H | 23.71098974 | -5.20285587  | 0.00000000 |
| H | 23.71099478 | 5.20283752   | 0.00000000 |
| H | 24.40143992 | -14.06861758 | 0.00000000 |
| H | 24.40143968 | 14.06861116  | 0.00000000 |
| H | 24.90685426 | -3.07386455  | 0.00000000 |
| H | 24.90685789 | 3.07384285   | 0.00000000 |
| H | 25.63213065 | -11.93908192 | 0.00000000 |
| H | 25.63213237 | 11.93906862  | 0.00000000 |
| H | 26.07734781 | -0.97085179  | 0.00000000 |
| H | 26.07734936 | 0.97082735   | 0.00000000 |
| H | 26.85467371 | -9.80426213  | 0.00000000 |
| H | 26.85467699 | 9.80424290   | 0.00000000 |
| H | 28.06892296 | -7.66350545  | 0.00000000 |
| H | 28.06892705 | 7.66348179   | 0.00000000 |
| H | 29.27563970 | -5.51434385  | 0.00000000 |
| H | 29.27564373 | 5.51431706   | 0.00000000 |
| H | 30.46581916 | -3.33600007  | 0.00000000 |
| H | 30.46582218 | 3.33597130   | 0.00000000 |
| H | 31.64174858 | -1.23886321  | 0.00000000 |
| H | 31.64175001 | 1.23883259   | 0.00000000 |

## 14-HGQR (singlet)

|   |              |              |            |
|---|--------------|--------------|------------|
| C | -33.15994342 | -0.67991698  | 0.00000000 |
| C | -33.15994303 | 0.68016623   | 0.00000000 |
| C | -31.96096519 | -2.81526986  | 0.00000000 |
| C | -31.94437816 | -1.42884071  | 0.00000000 |
| C | -31.94437786 | 1.42908938   | 0.00000000 |
| C | -31.96096459 | 2.81551636   | 0.00000000 |
| C | -30.78008617 | -4.97869134  | 0.00000000 |
| C | -30.78082432 | -3.58146649  | 0.00000000 |
| C | -30.68436059 | -0.72543577  | 0.00000000 |
| C | -30.68436061 | 0.72568536   | 0.00000000 |
| C | -30.78082543 | 3.58171105   | 0.00000000 |
| C | -30.78008810 | 4.97893149   | 0.00000000 |
| C | -29.57782565 | -7.12285185  | 0.00000000 |
| C | -29.59187436 | -5.72044632  | 0.00000000 |
| C | -29.51839443 | -2.87828090  | 0.00000000 |
| C | -29.51983281 | -1.47143497  | 0.00000000 |
| C | -29.51983423 | 1.47168342   | 0.00000000 |
| C | -29.51839754 | 2.87852707   | 0.00000000 |
| C | -29.59187957 | 5.72068218   | 0.00000000 |
| C | -29.57783199 | 7.12308073   | 0.00000000 |
| C | -28.36772239 | -9.26030423  | 0.00000000 |
| C | -28.38883339 | -7.85701127  | 0.00000000 |
| C | -28.32563258 | -5.01007537  | 0.00000000 |
| C | -28.33185169 | -3.61181306  | 0.00000000 |
| C | -28.33185856 | 3.61205653   | 0.00000000 |
| C | -28.32564158 | 5.01031351   | 0.00000000 |
| C | -28.38884484 | 7.85723288   | 0.00000000 |
| C | -28.36773541 | 9.26051592   | 0.00000000 |
| C | -27.14966898 | -11.39231319 | 0.00000000 |
| C | -27.17635053 | -9.99002197  | 0.00000000 |
| C | -27.12364996 | -7.14079381  | 0.00000000 |
| C | -27.13468090 | -5.74587774  | 0.00000000 |
| C | -27.13469543 | 5.74611070   | 0.00000000 |
| C | -27.12366718 | 7.14101813   | 0.00000000 |

|   |              |              |            |
|---|--------------|--------------|------------|
| C | -27.17637066 | 9.99022348   | 0.00000000 |
| C | -27.14969127 | 11.39250181  | 0.00000000 |
| C | -25.92380869 | -13.51952097 | 0.00000000 |
| C | -25.95516966 | -12.11881516 | 0.00000000 |
| C | -25.91311220 | -9.26850775  | 0.00000000 |
| C | -25.92987686 | -7.87389643  | 0.00000000 |
| C | -25.92990150 | 7.87411295   | 0.00000000 |
| C | -25.91314004 | 9.26871240   | 0.00000000 |
| C | -25.95520092 | 12.11899107  | 0.00000000 |
| C | -25.92384284 | 13.51968134  | 0.00000000 |
| C | -24.69034340 | -15.64218063 | 0.00000000 |
| C | -24.72592019 | -14.24311571 | 0.00000000 |
| C | -24.69447506 | -11.39244446 | 0.00000000 |
| C | -24.71747450 | -9.99689058  | 0.00000000 |
| C | -24.71751148 | 9.99708458   | 0.00000000 |
| C | -24.69451567 | 11.39262385  | 0.00000000 |
| C | -24.72596483 | 14.24326161  | 0.00000000 |
| C | -24.69039173 | 15.64230905  | 0.00000000 |
| C | -23.44945390 | -17.76037162 | 0.00000000 |
| C | -23.48896404 | -16.36285622 | 0.00000000 |
| C | -23.46790840 | -13.51208585 | 0.00000000 |
| C | -23.49711573 | -12.11522012 | 0.00000000 |
| C | -23.49716683 | 12.11538629  | 0.00000000 |
| C | -23.46796348 | 13.51223548  | 0.00000000 |
| C | -23.48902395 | 16.36296940  | 0.00000000 |
| C | -23.44951828 | 17.76046632  | 0.00000000 |
| C | -22.20115405 | -19.87424632 | 0.00000000 |
| C | -22.24451845 | -18.47788935 | 0.00000000 |
| C | -22.23360127 | -15.62728229 | 0.00000000 |
| C | -22.26876715 | -14.22902647 | 0.00000000 |
| C | -22.26883355 | 14.22916106  | 0.00000000 |
| C | -22.23367198 | 15.62739944  | 0.00000000 |
| C | -22.24459497 | 18.47796919  | 0.00000000 |
| C | -22.20123570 | 19.87430793  | 0.00000000 |
| C | -20.94514046 | -21.98420310 | 0.00000000 |
| C | -20.99284039 | -20.58773653 | 0.00000000 |
| C | -20.99192766 | -17.73799324 | 0.00000000 |
| C | -21.03259942 | -16.33840358 | 0.00000000 |
| C | -21.03268170 | 16.33850490  | 0.00000000 |
| C | -20.99201455 | 17.73807733  | 0.00000000 |
| C | -20.99293404 | 20.58778481  | 0.00000000 |
| C | -20.94523951 | 21.98423509  | 0.00000000 |
| C | -19.68065925 | -24.09115475 | 0.00000000 |
| C | -19.73444997 | -22.69162374 | 0.00000000 |
| C | -19.74358580 | -19.84401241 | 0.00000000 |
| C | -19.78884087 | -18.44364634 | 0.00000000 |
| C | -19.78893892 | 18.44371510  | 0.00000000 |
| C | -19.74368864 | 19.84406522  | 0.00000000 |
| C | -19.73455997 | 22.69164474  | 0.00000000 |
| C | -19.68077364 | 24.09116297  | 0.00000000 |
| C | -18.39074561 | -26.18989015 | 0.00000000 |
| C | -18.46832235 | -24.78518841 | 0.00000000 |
| C | -18.48934752 | -21.94475447 | 0.00000000 |
| C | -18.53768513 | -20.54543690 | 0.00000000 |
| C | -18.53779796 | 20.54547630  | 0.00000000 |
| C | -18.48946504 | 21.94477997  | 0.00000000 |
| C | -18.46844558 | 24.78518759  | 0.00000000 |
| C | -18.39087123 | 26.18988023  | 0.00000000 |
| C | -17.13625551 | -28.29174242 | 0.00000000 |
| C | -17.17981248 | -26.86471380 | 0.00000000 |
| C | -17.23083119 | -24.03886297 | 0.00000000 |
| C | -17.27855352 | -22.64443782 | 0.00000000 |
| C | -17.27867929 | 22.64445293  | 0.00000000 |
| C | -17.23096048 | 24.03886620  | 0.00000000 |
| C | -17.17994623 | 26.86469830  | 0.00000000 |
| C | -17.13639298 | 28.29172130  | 0.00000000 |
| C | -15.95708171 | -28.96900269 | 0.00000000 |
| C | -15.94273452 | -26.12130769 | 0.00000000 |
| C | -16.01075064 | -24.73968855 | 0.00000000 |
| C | -16.01088590 | 24.73968383  | 0.00000000 |
| C | -15.94287422 | 26.12129321  | 0.00000000 |
| C | -15.95722641 | 28.96897952  | 0.00000000 |
| C | -14.70268458 | -28.28735753 | 0.00000000 |
| C | -14.68434836 | -26.84410147 | 0.00000000 |
| C | -14.68449341 | 26.84408534  | 0.00000000 |
| C | -14.70283379 | 28.28733673  | 0.00000000 |
| C | -13.50948928 | -28.99304032 | 0.00000000 |
| C | -13.45677109 | -26.20672431 | 0.00000000 |
| C | -13.45692312 | 26.20671086  | 0.00000000 |
| C | -13.50964552 | 28.99301927  | 0.00000000 |
| C | -12.25712562 | -28.35217294 | 0.00000000 |
| C | -12.23646098 | -26.90709872 | 0.00000000 |
| C | -12.23661984 | 26.90708535  | 0.00000000 |

|   |              |              |            |
|---|--------------|--------------|------------|
| C | -12.25728578 | 28.35215547  | 0.00000000 |
| C | -11.04671115 | -29.04942108 | 0.00000000 |
| C | -11.00808274 | -26.24546429 | 0.00000000 |
| C | -11.00824663 | 26.24545351  | 0.00000000 |
| C | -11.04687746 | 29.04940427  | 0.00000000 |
| C | -9.81093147  | -28.39046730 | 0.00000000 |
| C | -9.79344468  | -26.93850604 | 0.00000000 |
| C | -9.79361387  | 26.93849488  | 0.00000000 |
| C | -9.81110162  | 28.39045306  | 0.00000000 |
| C | -8.58993505  | -29.07972263 | 0.00000000 |
| C | -8.56035569  | -26.27516653 | 0.00000000 |
| C | -8.56052844  | 26.27515685  | 0.00000000 |
| C | -8.59010974  | 29.07970869  | 0.00000000 |
| C | -7.35982521  | -28.41727037 | 0.00000000 |
| C | -7.34674878  | -26.96330542 | 0.00000000 |
| C | -7.34692521  | 26.96329544  | 0.00000000 |
| C | -7.36000266  | 28.41725848  | 0.00000000 |
| C | -6.13506322  | -29.10182371 | 0.00000000 |
| C | -6.11405147  | -26.29716849 | 0.00000000 |
| C | -6.11422977  | 26.29715944  | 0.00000000 |
| C | -6.13524331  | 29.10181253  | 0.00000000 |
| C | -4.90707838  | -28.43608166 | 0.00000000 |
| C | -4.89838991  | -26.98115615 | 0.00000000 |
| C | -4.89856991  | 26.98114691  | 0.00000000 |
| C | -4.90725926  | 28.43607191  | 0.00000000 |
| C | -3.68089850  | -29.11626266 | 0.00000000 |
| C | -3.66833207  | -26.31201198 | 0.00000000 |
| C | -3.66851206  | 26.31200317  | 0.00000000 |
| C | -3.68107982  | 29.11625406  | 0.00000000 |
| C | -2.45360309  | -28.44717091 | 0.00000000 |
| C | -2.44926749  | -26.99201866 | 0.00000000 |
| C | -2.44944706  | 26.99200983  | 0.00000000 |
| C | -2.45378318  | 28.44716292  | 0.00000000 |
| C | -1.22690877  | -29.12340310 | 0.00000000 |
| C | -1.22272569  | -26.31948436 | 0.00000000 |
| C | -1.22290355  | 26.31947544  | 0.00000000 |
| C | -1.22708724  | 29.12339633  | 0.00000000 |
| C | 0.00008103   | -28.45083189 | 0.00000000 |
| C | 0.00008197   | -26.99566755 | 0.00000000 |
| C | -0.00009382  | 26.99565884  | 0.00000000 |
| C | -0.00009486  | 28.45082491  | 0.00000000 |
| C | 1.22706986   | -29.12340439 | 0.00000000 |
| C | 1.22289028   | -26.31948606 | 0.00000000 |
| C | 1.22271716   | 26.31947692  | 0.00000000 |
| C | 1.22689681   | 29.12339838  | 0.00000000 |
| C | 2.45376461   | -28.44717363 | 0.00000000 |
| C | 2.44943083   | -26.99202184 | 0.00000000 |
| C | 2.44926047   | 26.99201305  | 0.00000000 |
| C | 2.45359448   | 28.44716682  | 0.00000000 |
| C | 3.68105853   | -29.11626646 | 0.00000000 |
| C | 3.66849540   | -26.31201701 | 0.00000000 |
| C | 3.66832781   | 26.31200765  | 0.00000000 |
| C | 3.68089142   | 29.11626024  | 0.00000000 |
| C | 4.90723821   | -28.43608692 | 0.00000000 |
| C | 4.89855141   | -26.98116234 | 0.00000000 |
| C | 4.89838645   | 26.98115346  | 0.00000000 |
| C | 4.90707362   | 28.43607978  | 0.00000000 |
| C | 6.13522103   | -29.10182973 | 0.00000000 |
| C | 6.11421218   | -26.29717661 | 0.00000000 |
| C | 6.11404973   | 26.29716709  | 0.00000000 |
| C | 6.13505892   | 29.10182293  | 0.00000000 |
| C | 7.35998206   | -28.41727780 | 0.00000000 |
| C | 7.34690706   | -26.96331429 | 0.00000000 |
| C | 7.34674687   | 26.96330553  | 0.00000000 |
| C | 7.35982200   | 28.41727049  | 0.00000000 |
| C | 8.59008936   | -29.07973041 | 0.00000000 |
| C | 8.56051227   | -26.27517732 | 0.00000000 |
| C | 8.56035458   | 26.27516798  | 0.00000000 |
| C | 8.58993112   | 29.07972351  | 0.00000000 |
| C | 9.81108393   | -28.39047631 | 0.00000000 |
| C | 9.79359816   | -26.93851704 | 0.00000000 |
| C | 9.79344255   | 26.93850890  | 0.00000000 |
| C | 9.81092772   | 28.39046957  | 0.00000000 |
| C | 11.04686072  | -29.04942976 | 0.00000000 |
| C | 11.00823359  | -26.24547711 | 0.00000000 |
| C | 11.00808073  | 26.24546860  | 0.00000000 |
| C | 11.04670605  | 29.04942414  | 0.00000000 |
| C | 12.25727208  | -28.35218231 | 0.00000000 |
| C | 12.23660792  | -26.90711087 | 0.00000000 |
| C | 12.23645743  | 26.90710410  | 0.00000000 |
| C | 12.25712039  | 28.35217748  | 0.00000000 |
| C | 13.50963270  | -28.99304810 | 0.00000000 |
| C | 13.45691411  | -26.20673781 | 0.00000000 |

|   |             |              |            |
|---|-------------|--------------|------------|
| C | 13.45676735 | 26.20673104  | 0.00000000 |
| C | 13.50948285 | 28.99304587  | 0.00000000 |
| C | 14.70282369 | -28.28736649 | 0.00000000 |
| C | 14.68448585 | -26.84411398 | 0.00000000 |
| C | 14.68434300 | 26.84410916  | 0.00000000 |
| C | 14.70267837 | 28.28736462  | 0.00000000 |
| C | 15.95721675 | -28.96901092 | 0.00000000 |
| C | 15.94286853 | -26.12132252 | 0.00000000 |
| C | 16.01088256 | -24.73971112 | 0.00000000 |
| C | 16.01074534 | 24.73969805  | 0.00000000 |
| C | 15.94272911 | 26.12131641  | 0.00000000 |
| C | 15.95707455 | 28.96901069  | 0.00000000 |
| C | 17.13638571 | -28.29175280 | 0.00000000 |
| C | 17.17994091 | -26.86472865 | 0.00000000 |
| C | 17.23095887 | -24.03889260 | 0.00000000 |
| C | 17.27867989 | -22.64447736 | 0.00000000 |
| C | 17.27854833 | 22.64444840  | 0.00000000 |
| C | 17.23082572 | 24.03887322  | 0.00000000 |
| C | 17.17980629 | 26.86472315  | 0.00000000 |
| C | 17.13624863 | 28.29175142  | 0.00000000 |
| C | 18.39086779 | -26.18990989 | 0.00000000 |
| C | 18.46844404 | -24.78521550 | 0.00000000 |
| C | 18.48946703 | -21.94480276 | 0.00000000 |
| C | 18.53780202 | -20.54549736 | 0.00000000 |
| C | 18.53768075 | 20.54544808  | 0.00000000 |
| C | 18.48934260 | 21.94476581  | 0.00000000 |
| C | 18.46831650 | 24.78519861  | 0.00000000 |
| C | 18.39073935 | 26.18990004  | 0.00000000 |
| C | 19.68077399 | -24.09118941 | 0.00000000 |
| C | 19.73456221 | -22.69166859 | 0.00000000 |
| C | 19.74369353 | -19.84408381 | 0.00000000 |
| C | 19.78894517 | -18.44373204 | 0.00000000 |
| C | 19.78883883 | 18.44365796  | 0.00000000 |
| C | 19.74358235 | 19.84402453  | 0.00000000 |
| C | 19.73444451 | 22.69163531  | 0.00000000 |
| C | 19.68065309 | 24.09116565  | 0.00000000 |
| C | 20.94524371 | -21.98425677 | 0.00000000 |
| C | 20.99293960 | -20.58780347 | 0.00000000 |
| C | 20.99202110 | -17.73809125 | 0.00000000 |
| C | 21.03268870 | -16.33851724 | 0.00000000 |
| C | 21.03260118 | 16.33841564  | 0.00000000 |
| C | 20.99192703 | 17.73800593  | 0.00000000 |
| C | 20.99283601 | 20.58774967  | 0.00000000 |
| C | 20.94513466 | 21.98421553  | 0.00000000 |
| C | 22.20124265 | -19.87432368 | 0.00000000 |
| C | 22.24460246 | -18.47798221 | 0.00000000 |
| C | 22.23367894 | -15.62740849 | 0.00000000 |
| C | 22.26884033 | -14.22916846 | 0.00000000 |
| C | 22.26877347 | 14.22903930  | 0.00000000 |
| C | 22.23360460 | 15.62729551  | 0.00000000 |
| C | 22.24451657 | 18.47790382  | 0.00000000 |
| C | 22.20114987 | 19.87426052  | 0.00000000 |
| C | 23.44952638 | -17.76047606 | 0.00000000 |
| C | 23.48903199 | -16.36297698 | 0.00000000 |
| C | 23.46797019 | -13.51223950 | 0.00000000 |
| C | 23.49717313 | -12.11538850 | 0.00000000 |
| C | 23.49712636 | 12.11523434  | 0.00000000 |
| C | 23.46791598 | 13.51209995  | 0.00000000 |
| C | 23.48896583 | 16.36287154  | 0.00000000 |
| C | 23.44945283 | 17.76038717  | 0.00000000 |
| C | 24.69039981 | -15.64231323 | 0.00000000 |
| C | 24.72597264 | -14.24326406 | 0.00000000 |
| C | 24.69452213 | -11.39262282 | 0.00000000 |
| C | 24.71751766 | -9.99708166  | 0.00000000 |
| C | 24.71748838 | 9.99690667   | 0.00000000 |
| C | 24.69448632 | 11.39245993  | 0.00000000 |
| C | 24.72592599 | 14.24313170  | 0.00000000 |
| C | 24.69034628 | 15.64219700  | 0.00000000 |
| C | 25.92385046 | -13.51968050 | 0.00000000 |
| C | 25.95520837 | -12.11898874 | 0.00000000 |
| C | 25.91314667 | -9.26870672  | 0.00000000 |
| C | 25.92990818 | -7.87410547  | 0.00000000 |
| C | 25.92989257 | 7.87391435   | 0.00000000 |
| C | 25.91312600 | 9.26852480   | 0.00000000 |
| C | 25.95517903 | 12.11883196  | 0.00000000 |
| C | 25.92381544 | 13.51953799  | 0.00000000 |
| C | 27.14969851 | -11.39249652 | 0.00000000 |
| C | 27.17637800 | -9.99021693  | 0.00000000 |
| C | 27.12367451 | -7.14100859  | 0.00000000 |
| C | 27.13470323 | -5.74609962  | 0.00000000 |
| C | 27.13469701 | 5.74589690   | 0.00000000 |
| C | 27.12366498 | 7.14081216   | 0.00000000 |
| C | 27.17636255 | 9.99003965   | 0.00000000 |

|   |              |              |            |
|---|--------------|--------------|------------|
| C | 27.14967892  | 11.39233088  | 0.00000000 |
| C | 28.36774261  | -9.26050697  | 0.00000000 |
| C | 28.38885250  | -7.85722295  | 0.00000000 |
| C | 28.32565012  | -5.01030112  | 0.00000000 |
| C | 28.33186796  | -3.61204296  | 0.00000000 |
| C | 28.33186697  | 3.61183254   | 0.00000000 |
| C | 28.32564760  | 5.01009433   | 0.00000000 |
| C | 28.38884701  | 7.85702952   | 0.00000000 |
| C | 28.36773464  | 9.26032240   | 0.00000000 |
| C | 29.57783963  | -7.12306907  | 0.00000000 |
| C | 29.59188802  | -5.72066984  | 0.00000000 |
| C | 29.51840762  | -2.87851275  | 0.00000000 |
| C | 29.51984523  | -1.47166845  | 0.00000000 |
| C | 29.51984612  | 1.47145358   | 0.00000000 |
| C | 29.51840842  | 2.87829937   | 0.00000000 |
| C | 29.59188850  | 5.72046448   | 0.00000000 |
| C | 29.57783920  | 7.12286996   | 0.00000000 |
| C | 30.78009661  | -4.97891801  | 0.00000000 |
| C | 30.78083493  | -3.58169714  | 0.00000000 |
| C | 30.68437192  | -0.72566956  | 0.00000000 |
| C | 30.68437271  | 0.72545227   | 0.00000000 |
| C | 30.78083794  | 3.58148375   | 0.00000000 |
| C | 30.78009997  | 4.97870863   | 0.00000000 |
| C | 31.96097407  | -2.81550184  | 0.00000000 |
| C | 31.94438844  | -1.42907446  | 0.00000000 |
| C | 31.94439060  | 1.42885620   | 0.00000000 |
| C | 31.96097808  | 2.81528568   | 0.00000000 |
| C | 33.15995406  | -0.68015222  | 0.00000000 |
| C | 33.15995535  | 0.67993174   | 0.00000000 |
| H | -34.10601033 | -1.23875218  | 0.00000000 |
| H | -34.10600980 | 1.23900064   | 0.00000000 |
| H | -32.93050652 | -3.33539648  | 0.00000000 |
| H | -32.93050532 | 3.33564124   | 0.00000000 |
| H | -31.74142953 | -5.51355350  | 0.00000000 |
| H | -31.74143006 | 5.51379113   | 0.00000000 |
| H | -30.53627067 | -7.66294820  | 0.00000000 |
| H | -30.53627437 | 7.66317430   | 0.00000000 |
| H | -29.32401843 | -9.80425656  | 0.00000000 |
| H | -29.32402748 | 9.80446526   | 0.00000000 |
| H | -28.54145388 | -0.97112410  | 0.00000000 |
| H | -28.54145663 | 0.97137100   | 0.00000000 |
| H | -28.10387501 | -11.93997478 | 0.00000000 |
| H | -28.10389202 | 11.94016035  | 0.00000000 |
| H | -27.37138065 | -3.07515413  | 0.00000000 |
| H | -27.37139008 | 3.07539721   | 0.00000000 |
| H | -26.87598191 | -14.07073904 | 0.00000000 |
| H | -26.87600968 | 14.07089638  | 0.00000000 |
| H | -26.17650663 | -5.20535577  | 0.00000000 |
| H | -26.17652514 | 5.20558890   | 0.00000000 |
| H | -25.64051613 | -16.19683905 | 0.00000000 |
| H | -25.64055735 | 16.19696442  | 0.00000000 |
| H | -24.97370708 | -7.32980099  | 0.00000000 |
| H | -24.97373696 | 7.33001828   | 0.00000000 |
| H | -24.39763084 | -18.31840371 | 0.00000000 |
| H | -24.39768786 | 18.31849536  | 0.00000000 |
| H | -23.76329613 | -9.44926300  | 0.00000000 |
| H | -23.76333938 | 9.44945835   | 0.00000000 |
| H | -23.14732189 | -20.43562647 | 0.00000000 |
| H | -23.14739638 | 20.43568519  | 0.00000000 |
| H | -22.54495888 | -11.56405563 | 0.00000000 |
| H | -22.54501690 | 11.56422371  | 0.00000000 |
| H | -21.88929330 | -22.54890527 | 0.00000000 |
| H | -21.88938579 | 22.54893489  | 0.00000000 |
| H | -21.31862952 | -13.67438780 | 0.00000000 |
| H | -21.31870306 | 13.67452479  | 0.00000000 |
| H | -20.62206304 | -24.66037310 | 0.00000000 |
| H | -20.62217154 | 24.66038016  | 0.00000000 |
| H | -20.08444244 | -15.78041369 | 0.00000000 |
| H | -20.08453159 | 15.78051786  | 0.00000000 |
| H | -19.32419418 | -26.77234085 | 0.00000000 |
| H | -19.32431530 | 26.77232995  | 0.00000000 |
| H | -18.84258331 | -17.88248567 | 0.00000000 |
| H | -18.84268749 | 17.88255772  | 0.00000000 |
| H | -18.09221234 | -28.83344797 | 0.00000000 |
| H | -18.09234749 | 28.83342396  | 0.00000000 |
| H | -17.59326596 | -19.98121888 | 0.00000000 |
| H | -17.59338380 | 19.98126196  | 0.00000000 |
| H | -16.33602294 | -22.07687865 | 0.00000000 |
| H | -16.33615266 | 22.07689737  | 0.00000000 |
| H | -15.94316257 | -30.06767651 | 0.00000000 |
| H | -15.94330725 | 30.06765065  | 0.00000000 |
| H | -15.09006639 | -24.13972145 | 0.00000000 |
| H | -15.09020348 | 24.13972148  | 0.00000000 |

|   |              |              |            |
|---|--------------|--------------|------------|
| H | -13.54211869 | -30.09279770 | 0.00000000 |
| H | -13.40263749 | -25.10918836 | 0.00000000 |
| H | -13.40278884 | 25.10917852  | 0.00000000 |
| H | -13.54227650 | 30.09277424  | 0.00000000 |
| H | -11.06375215 | -30.14938252 | 0.00000000 |
| H | -10.99299244 | -25.14536500 | 0.00000000 |
| H | -10.99315455 | 25.14535712  | 0.00000000 |
| H | -11.06391958 | 30.14936356  | 0.00000000 |
| H | -8.60184074  | -30.17977670 | 0.00000000 |
| H | -8.54898295  | -25.17512348 | 0.00000000 |
| H | -8.54915412  | 25.17511592  | 0.00000000 |
| H | -8.60201557  | 30.17976105  | 0.00000000 |
| H | -6.14342035  | -30.20193851 | 0.00000000 |
| H | -6.10590835  | -25.19708188 | 0.00000000 |
| H | -6.10608507  | 25.19707415  | 0.00000000 |
| H | -6.14360008  | 30.20192632  | 0.00000000 |
| H | -3.68584030  | -30.21642261 | 0.00000000 |
| H | -3.66339760  | -25.21188428 | 0.00000000 |
| H | -3.66357611  | 25.21187596  | 0.00000000 |
| H | -3.68602106  | 30.21641380  | 0.00000000 |
| H | -1.22854336  | -30.22358748 | 0.00000000 |
| H | -1.22107269  | -25.21933299 | 0.00000000 |
| H | -1.22124950  | 25.21932380  | 0.00000000 |
| H | -1.22872134  | 30.22358121  | 0.00000000 |
| H | 1.22870266   | -30.22358858 | 0.00000000 |
| H | 1.22123803   | -25.21933494 | 0.00000000 |
| H | 1.22106535   | 25.21932497  | 0.00000000 |
| H | 1.22852987   | 30.22358352  | 0.00000000 |
| H | 3.68599863   | -30.21642582 | 0.00000000 |
| H | 3.66356162   | -25.21189006 | 0.00000000 |
| H | 3.66339409   | 25.21187953  | 0.00000000 |
| H | 3.68583153   | 30.21642074  | 0.00000000 |
| H | 6.14357667   | -30.20194357 | 0.00000000 |
| H | 6.10606960   | -25.19709127 | 0.00000000 |
| H | 6.10590729   | 25.19708032  | 0.00000000 |
| H | 6.14341437   | 30.20193791  | 0.00000000 |
| H | 8.60199390   | -30.17978317 | 0.00000000 |
| H | 8.54913984   | -25.17513610 | 0.00000000 |
| H | 8.54898261   | 25.17512502  | 0.00000000 |
| H | 8.60183533   | 30.17977743  | 0.00000000 |
| H | 11.06390120  | -30.14938956 | 0.00000000 |
| H | 10.99314316  | -25.14538026 | 0.00000000 |
| H | 10.99299128  | 25.14536959  | 0.00000000 |
| H | 11.06374596  | 30.14938529  | 0.00000000 |
| H | 13.54226187  | -30.09280355 | 0.00000000 |
| H | 13.40278057  | -25.10920494 | 0.00000000 |
| H | 13.40263527  | 25.10919539  | 0.00000000 |
| H | 13.54211132  | 30.09280297  | 0.00000000 |
| H | 15.09020036  | -24.13974756 | 0.00000000 |
| H | 15.09006144  | 24.13973117  | 0.00000000 |
| H | 15.94329614  | -30.06768244 | 0.00000000 |
| H | 15.94315435  | 30.06768416  | 0.00000000 |
| H | 16.33615311  | -22.07692143 | 0.00000000 |
| H | 16.33601837  | 22.07688883  | 0.00000000 |
| H | 17.59338762  | -19.98128320 | 0.00000000 |
| H | 17.59326220  | 19.98122944  | 0.00000000 |
| H | 18.09234009  | -28.83345655 | 0.00000000 |
| H | 18.09220492  | 28.83345716  | 0.00000000 |
| H | 18.84269338  | -17.88257540 | 0.00000000 |
| H | 18.84258203  | 17.88249638  | 0.00000000 |
| H | 19.32431197  | -26.77236033 | 0.00000000 |
| H | 19.32418724  | 26.77235093  | 0.00000000 |
| H | 20.08453817  | -15.78053126 | 0.00000000 |
| H | 20.08444514  | 15.78042475  | 0.00000000 |
| H | 20.62217218  | -24.66040728 | 0.00000000 |
| H | 20.62205594  | 24.66038430  | 0.00000000 |
| H | 21.31870941  | -13.67453331 | 0.00000000 |
| H | 21.31863698  | 13.67439978  | 0.00000000 |
| H | 21.88939035  | -22.54895720 | 0.00000000 |
| H | 21.88928642  | 22.54891803  | 0.00000000 |
| H | 22.54502280  | -11.56422694 | 0.00000000 |
| H | 22.54497085  | 11.56406925  | 0.00000000 |
| H | 23.14740374  | -20.43570116 | 0.00000000 |
| H | 23.14731648  | 20.43564132  | 0.00000000 |
| H | 23.76334525  | -9.44945624  | 0.00000000 |
| H | 23.76331148  | 9.44927875   | 0.00000000 |
| H | 24.39769639  | -18.31850469 | 0.00000000 |
| H | 24.39762838  | 18.31842034  | 0.00000000 |
| H | 24.97374350  | -7.33001132  | 0.00000000 |
| H | 24.97372423  | 7.32981884   | 0.00000000 |
| H | 25.64056585  | -16.19696768 | 0.00000000 |
| H | 25.64051748  | 16.19685678  | 0.00000000 |
| H | 26.17653302  | -5.20557807  | 0.00000000 |

|   |             |              |            |
|---|-------------|--------------|------------|
| H | 26.17652396 | 5.20537516   | 0.00000000 |
| H | 26.87601761 | -14.07089441 | 0.00000000 |
| H | 26.87598711 | 14.07075733  | 0.00000000 |
| H | 27.37139976 | -3.07538381  | 0.00000000 |
| H | 27.37139675 | 3.07517420   | 0.00000000 |
| H | 28.10389938 | -11.94015402 | 0.00000000 |
| H | 28.10388359 | 11.93999328  | 0.00000000 |
| H | 28.54146777 | -0.97135707  | 0.00000000 |
| H | 28.54146733 | 0.97114421   | 0.00000000 |
| H | 29.32403457 | -9.80445553  | 0.00000000 |
| H | 29.32402965 | 9.80427489   | 0.00000000 |
| H | 30.53628169 | -7.66316217  | 0.00000000 |
| H | 30.53628359 | 7.66296586   | 0.00000000 |
| H | 31.74143813 | -5.51377741  | 0.00000000 |
| H | 31.74144312 | 5.51356981   | 0.00000000 |
| H | 32.93051413 | -3.33562703  | 0.00000000 |
| H | 32.93051928 | 3.33541139   | 0.00000000 |
| H | 34.10601973 | -1.23898767  | 0.00000000 |
| H | 34.10602189 | 1.23876668   | 0.00000000 |

## 15-HGQR (singlet)

|   |              |              |            |
|---|--------------|--------------|------------|
| C | -35.62692609 | -0.68000782  | 0.00000000 |
| C | -35.62692399 | 0.68003541   | 0.00000000 |
| C | -34.42814864 | -2.81513536  | 0.00000000 |
| C | -34.41131948 | -1.42879695  | 0.00000000 |
| C | -34.41131533 | 1.42882104   | 0.00000000 |
| C | -34.42814008 | 2.81515914   | 0.00000000 |
| C | -33.24805688 | -4.97863817  | 0.00000000 |
| C | -33.24819383 | -3.58155961  | 0.00000000 |
| C | -33.15112065 | -0.72554071  | 0.00000000 |
| C | -33.15111839 | 0.72556152   | 0.00000000 |
| C | -33.24818334 | 3.58157975   | 0.00000000 |
| C | -33.24804244 | 4.97865750   | 0.00000000 |
| C | -32.04699532 | -7.12312379  | 0.00000000 |
| C | -32.06013685 | -5.72089641  | 0.00000000 |
| C | -31.98547558 | -2.87872529  | 0.00000000 |
| C | -31.98672264 | -1.47179486  | 0.00000000 |
| C | -31.98671837 | 1.47181213   | 0.00000000 |
| C | -31.98546757 | 2.87874232   | 0.00000000 |
| C | -32.06012111 | 5.72091230   | 0.00000000 |
| C | -32.04697600 | 7.12313870   | 0.00000000 |
| C | -30.83848175 | -9.26115557  | 0.00000000 |
| C | -30.85840773 | -7.85803133  | 0.00000000 |
| C | -30.79348201 | -5.01111578  | 0.00000000 |
| C | -30.79924120 | -3.61272002  | 0.00000000 |
| C | -30.79923183 | 3.61273372   | 0.00000000 |
| C | -30.79346903 | 5.01112903   | 0.00000000 |
| C | -30.85838750 | 7.85804325   | 0.00000000 |
| C | -30.83845843 | 9.26116685   | 0.00000000 |
| C | -29.62236481 | -11.39401366 | 0.00000000 |
| C | -29.64764178 | -9.99178130  | 0.00000000 |
| C | -29.59269449 | -7.14264927  | 0.00000000 |
| C | -29.60300008 | -5.74756820  | 0.00000000 |
| C | -29.60298579 | 5.74757829   | 0.00000000 |
| C | -29.59267681 | 7.14265899   | 0.00000000 |
| C | -29.64761762 | 9.99179042   | 0.00000000 |
| C | -29.62233795 | 11.39402296  | 0.00000000 |
| C | -28.39875040 | -13.52236321 | 0.00000000 |
| C | -28.42859257 | -12.12145343 | 0.00000000 |
| C | -28.38379423 | -9.27136798  | 0.00000000 |
| C | -28.39951830 | -7.87661353  | 0.00000000 |
| C | -28.39949924 | 7.87662072   | 0.00000000 |
| C | -28.38377199 | 9.27137516   | 0.00000000 |
| C | -28.42856455 | 12.12146152  | 0.00000000 |
| C | -28.39871994 | 13.52237240  | 0.00000000 |
| C | -27.16783067 | -15.64645213 | 0.00000000 |
| C | -27.20190532 | -14.24677824 | 0.00000000 |
| C | -27.16724792 | -11.39646851 | 0.00000000 |
| C | -27.18881949 | -10.00091413 | 0.00000000 |
| C | -27.18879553 | 10.00091963  | 0.00000000 |
| C | -27.16722097 | 11.39647464  | 0.00000000 |
| C | -27.20187323 | 14.24678700  | 0.00000000 |
| C | -27.16779634 | 15.64646248  | 0.00000000 |
| C | -25.92985675 | -17.76629262 | 0.00000000 |
| C | -25.96794597 | -16.36779137 | 0.00000000 |
| C | -25.94320349 | -13.51741663 | 0.00000000 |
| C | -25.97053208 | -12.12086720 | 0.00000000 |
| C | -25.97050300 | 12.12087254  | 0.00000000 |
| C | -25.94317169 | 13.51742330  | 0.00000000 |
| C | -25.96790995 | 16.36780145  | 0.00000000 |
| C | -25.92981897 | 17.76630380  | 0.00000000 |
| C | -24.68503650 | -19.88187681 | 0.00000000 |
| C | -24.72688837 | -18.48459244 | 0.00000000 |
| C | -24.71175258 | -15.63410537 | 0.00000000 |

|   |              |              |            |
|---|--------------|--------------|------------|
| C | -24.74462045 | -14.23661554 | 0.00000000 |
| C | -24.74458629 | 14.23662204  | 0.00000000 |
| C | -24.71171635 | 15.63411345  | 0.00000000 |
| C | -24.72684955 | 18.48460275  | 0.00000000 |
| C | -24.68499696 | 19.88188676  | 0.00000000 |
| C | -23.43339325 | -21.99336819 | 0.00000000 |
| C | -23.47886071 | -20.59708664 | 0.00000000 |
| C | -23.47306276 | -17.74664308 | 0.00000000 |
| C | -23.51126786 | -16.34815434 | 0.00000000 |
| C | -23.51122966 | 16.34816225  | 0.00000000 |
| C | -23.47302368 | 17.74665194  | 0.00000000 |
| C | -23.47882138 | 20.59709473  | 0.00000000 |
| C | -23.43335459 | 21.99337429  | 0.00000000 |
| C | -22.17461996 | -24.10121122 | 0.00000000 |
| C | -22.22410709 | -22.70478734 | 0.00000000 |
| C | -22.22752252 | -19.85509863 | 0.00000000 |
| C | -22.27072942 | -18.45552131 | 0.00000000 |
| C | -22.27068939 | 18.45552925  | 0.00000000 |
| C | -22.22748309 | 19.85510616  | 0.00000000 |
| C | -22.22406970 | 22.70479090  | 0.00000000 |
| C | -22.17458425 | 24.10121208  | 0.00000000 |
| C | -20.90796729 | -26.20636497 | 0.00000000 |
| C | -20.96316659 | -24.80689878 | 0.00000000 |
| C | -20.97585573 | -21.95927845 | 0.00000000 |
| C | -21.02323561 | -20.55901590 | 0.00000000 |
| C | -21.02319650 | 20.55902143  | 0.00000000 |
| C | -20.97581829 | 21.95928221  | 0.00000000 |
| C | -20.96313222 | 24.80689703  | 0.00000000 |
| C | -20.90793467 | 26.20636106  | 0.00000000 |
| C | -19.61647824 | -28.30363505 | 0.00000000 |
| C | -19.69505769 | -26.89904798 | 0.00000000 |
| C | -19.71885408 | -24.05857245 | 0.00000000 |
| C | -19.76895368 | -22.65935049 | 0.00000000 |
| C | -19.76891751 | 22.65935146  | 0.00000000 |
| C | -19.71881962 | 24.05857096  | 0.00000000 |
| C | -19.69502562 | 26.89904166  | 0.00000000 |
| C | -19.61644727 | 28.30362758  | 0.00000000 |
| C | -18.36118112 | -30.40453599 | 0.00000000 |
| C | -18.40517811 | -28.97756949 | 0.00000000 |
| C | -18.45815222 | -26.15159404 | 0.00000000 |
| C | -18.50727577 | -24.75721382 | 0.00000000 |
| C | -18.50724282 | 24.75720927  | 0.00000000 |
| C | -18.45812031 | 26.15158684  | 0.00000000 |
| C | -18.40514721 | 28.97755913  | 0.00000000 |
| C | -18.36114802 | 30.40452539  | 0.00000000 |
| C | -17.18175961 | -31.08124203 | 0.00000000 |
| C | -17.16850192 | -28.23330313 | 0.00000000 |
| C | -17.23752261 | -26.85168576 | 0.00000000 |
| C | -17.23749170 | 26.85167583  | 0.00000000 |
| C | -17.16847188 | 28.23329103  | 0.00000000 |
| C | -17.18172775 | 31.08122895  | 0.00000000 |
| C | -15.92779654 | -30.39889555 | 0.00000000 |
| C | -15.90979502 | -28.95553524 | 0.00000000 |
| C | -15.90976557 | 28.95552117  | 0.00000000 |
| C | -15.92776549 | 30.39888160  | 0.00000000 |
| C | -14.73455757 | -31.10428701 | 0.00000000 |
| C | -14.68227545 | -28.31793973 | 0.00000000 |
| C | -14.68224942 | 28.31792316  | 0.00000000 |
| C | -14.73452784 | 31.10427217  | 0.00000000 |
| C | -13.48235016 | -30.46323302 | 0.00000000 |
| C | -13.46169990 | -29.01807667 | 0.00000000 |
| C | -13.46167513 | 29.01805841  | 0.00000000 |
| C | -13.48232339 | 30.46321551  | 0.00000000 |
| C | -12.27218999 | -31.16058139 | 0.00000000 |
| C | -12.23323474 | -28.35658664 | 0.00000000 |
| C | -12.23321340 | 28.35656569  | 0.00000000 |
| C | -12.27216424 | 31.16056291  | 0.00000000 |
| C | -11.03633201 | -30.50178033 | 0.00000000 |
| C | -11.01848149 | -29.04975083 | 0.00000000 |
| C | -11.01846151 | 29.04972861  | 0.00000000 |
| C | -11.03630970 | 30.50175940  | 0.00000000 |
| C | -9.81582910  | -31.19148234 | 0.00000000 |
| C | -9.78516542  | -28.38688826 | 0.00000000 |
| C | -9.78514818  | 28.38686307  | 0.00000000 |
| C | -9.81580784  | 31.19146067  | 0.00000000 |
| C | -8.58543206  | -30.52950374 | 0.00000000 |
| C | -8.57160382  | -29.07549383 | 0.00000000 |
| C | -8.57158735  | 29.07546789  | 0.00000000 |
| C | -8.58541379  | 30.52947975  | 0.00000000 |
| C | -7.36135472  | -31.21485346 | 0.00000000 |
| C | -7.33849990  | -28.41015425 | 0.00000000 |
| C | -7.33848573  | 28.41012544  | 0.00000000 |
| C | -7.36133731  | 31.21482923  | 0.00000000 |

|   |             |              |            |
|---|-------------|--------------|------------|
| C | -6.13295204 | -30.54987969 | 0.00000000 |
| C | -6.12311711 | -29.09497412 | 0.00000000 |
| C | -6.12310330 | 29.09494507  | 0.00000000 |
| C | -6.13293685 | 30.54985304  | 0.00000000 |
| C | -4.90753587 | -31.23121382 | 0.00000000 |
| C | -4.89236020 | -28.42694715 | 0.00000000 |
| C | -4.89234828 | 28.42691567  | 0.00000000 |
| C | -4.90752148 | 31.23118745  | 0.00000000 |
| C | -3.67983538 | -30.56318516 | 0.00000000 |
| C | -3.67395198 | -29.10816019 | 0.00000000 |
| C | -3.67394033 | 29.10812893  | 0.00000000 |
| C | -3.67982264 | 30.56315644  | 0.00000000 |
| C | -2.45380397 | -31.24092103 | 0.00000000 |
| C | -2.44623433 | -28.43707659 | 0.00000000 |
| C | -2.44622416 | 28.43704327  | 0.00000000 |
| C | -2.45379210 | 31.24089295  | 0.00000000 |
| C | -1.22660592 | -30.56974657 | 0.00000000 |
| C | -1.22464781 | -29.11481597 | 0.00000000 |
| C | -1.22463803 | 29.11478332  | 0.00000000 |
| C | -1.22659548 | 30.56971644  | 0.00000000 |
| C | 0.00000279  | -31.24414101 | 0.00000000 |
| C | 0.00000281  | -28.44045923 | 0.00000000 |
| C | 0.00001150  | 28.44042489  | 0.00000000 |
| C | 0.00001225  | 31.24411182  | 0.00000000 |
| C | 1.22661133  | -30.56974653 | 0.00000000 |
| C | 1.22465323  | -29.11481604 | 0.00000000 |
| C | 1.22466120  | 29.11478274  | 0.00000000 |
| C | 1.22661941  | 30.56971568  | 0.00000000 |
| C | 2.45380891  | -31.24092092 | 0.00000000 |
| C | 2.44623928  | -28.43707674 | 0.00000000 |
| C | 2.44624640  | 28.43704222  | 0.00000000 |
| C | 2.45381582  | 31.24089134  | 0.00000000 |
| C | 3.67983953  | -30.56318504 | 0.00000000 |
| C | 3.67395614  | -29.10816037 | 0.00000000 |
| C | 3.67396202  | 29.10812720  | 0.00000000 |
| C | 3.67984509  | 30.56315419  | 0.00000000 |
| C | 4.90753901  | -31.23121362 | 0.00000000 |
| C | 4.89236333  | -28.42694742 | 0.00000000 |
| C | 4.89236839  | 28.42691355  | 0.00000000 |
| C | 4.90754305  | 31.23118431  | 0.00000000 |
| C | 6.13295401  | -30.54987952 | 0.00000000 |
| C | 6.12311906  | -29.09497435 | 0.00000000 |
| C | 6.12312235  | 29.09494216  | 0.00000000 |
| C | 6.13295664  | 30.54984937  | 0.00000000 |
| C | 7.36135537  | -31.21485321 | 0.00000000 |
| C | 7.33850050  | -28.41015456 | 0.00000000 |
| C | 7.33850279  | 28.41012220  | 0.00000000 |
| C | 7.36135579  | 31.21482468  | 0.00000000 |
| C | 8.58543141  | -30.52950352 | 0.00000000 |
| C | 8.57160313  | -29.07549406 | 0.00000000 |
| C | 8.57160312  | 29.07546378  | 0.00000000 |
| C | 8.58543026  | 30.52947478  | 0.00000000 |
| C | 9.81582713  | -31.19148205 | 0.00000000 |
| C | 9.78516336  | -28.38688853 | 0.00000000 |
| C | 9.78516186  | 28.38685865  | 0.00000000 |
| C | 9.81582289  | 31.19145485  | 0.00000000 |
| C | 11.03632884 | -30.50178008 | 0.00000000 |
| C | 11.01847827 | -29.04975099 | 0.00000000 |
| C | 11.01847388 | 29.04972331  | 0.00000000 |
| C | 11.03632276 | 30.50175321  | 0.00000000 |
| C | 12.27218577 | -31.16058105 | 0.00000000 |
| C | 12.23323038 | -28.35658681 | 0.00000000 |
| C | 12.23322386 | 28.35656011  | 0.00000000 |
| C | 12.27217605 | 31.16055588  | 0.00000000 |
| C | 13.48234495 | -30.46323268 | 0.00000000 |
| C | 13.46169460 | -29.01807670 | 0.00000000 |
| C | 13.46168438 | 29.01805189  | 0.00000000 |
| C | 13.48233330 | 30.46320809  | 0.00000000 |
| C | 14.73455167 | -31.10428651 | 0.00000000 |
| C | 14.68226935 | -28.31793973 | 0.00000000 |
| C | 14.68225700 | 28.31791630  | 0.00000000 |
| C | 14.73453681 | 31.10426378  | 0.00000000 |
| C | 15.92778990 | -30.39889515 | 0.00000000 |
| C | 15.90978821 | -28.95553516 | 0.00000000 |
| C | 15.90977188 | 28.95551356  | 0.00000000 |
| C | 15.92777275 | 30.39887313  | 0.00000000 |
| C | 17.18175259 | -31.08124164 | 0.00000000 |
| C | 17.16849478 | -28.23330322 | 0.00000000 |
| C | 17.23751530 | -26.85168624 | 0.00000000 |
| C | 17.23749633 | 26.85166985  | 0.00000000 |
| C | 17.16847718 | 28.23328358  | 0.00000000 |
| C | 17.18173417 | 31.08122001  | 0.00000000 |
| C | 18.36117369 | -30.40453590 | 0.00000000 |

|   |             |              |            |
|---|-------------|--------------|------------|
| C | 18.40517066 | -28.97756967 | 0.00000000 |
| C | 18.45814474 | -26.15159480 | 0.00000000 |
| C | 18.50726825 | -24.75721484 | 0.00000000 |
| C | 18.50724618 | 24.75720595  | 0.00000000 |
| C | 18.45812405 | 26.15158191  | 0.00000000 |
| C | 18.40515160 | 28.97755148  | 0.00000000 |
| C | 18.36115310 | 30.40451679  | 0.00000000 |
| C | 19.61647060 | -28.30363554 | 0.00000000 |
| C | 19.69505005 | -26.89904871 | 0.00000000 |
| C | 19.71884645 | -24.05857358 | 0.00000000 |
| C | 19.76894600 | -22.65935173 | 0.00000000 |
| C | 19.76891925 | 22.65935109  | 0.00000000 |
| C | 19.71882184 | 24.05856884  | 0.00000000 |
| C | 19.69502849 | 26.89903618  | 0.00000000 |
| C | 19.61645045 | 28.30362079  | 0.00000000 |
| C | 20.90795955 | -26.20636592 | 0.00000000 |
| C | 20.96315885 | -24.80689986 | 0.00000000 |
| C | 20.97584801 | -21.95927965 | 0.00000000 |
| C | 21.02322787 | -20.55901703 | 0.00000000 |
| C | 21.02319644 | 20.55902432  | 0.00000000 |
| C | 20.97581871 | 21.95928326  | 0.00000000 |
| C | 20.96313346 | 24.80689432  | 0.00000000 |
| C | 20.90793641 | 26.20635677  | 0.00000000 |
| C | 22.17461218 | -24.10121239 | 0.00000000 |
| C | 22.22409934 | -22.70478852 | 0.00000000 |
| C | 22.22751486 | -19.85509954 | 0.00000000 |
| C | 22.27072178 | -18.45552189 | 0.00000000 |
| C | 22.27068749 | 18.45553542  | 0.00000000 |
| C | 22.22748165 | 19.85511053  | 0.00000000 |
| C | 22.22406903 | 22.70479132  | 0.00000000 |
| C | 22.17458419 | 24.10121066  | 0.00000000 |
| C | 23.43338559 | -21.99336931 | 0.00000000 |
| C | 23.47885316 | -20.59708758 | 0.00000000 |
| C | 23.47305535 | -17.74664325 | 0.00000000 |
| C | 23.51126051 | -16.34815388 | 0.00000000 |
| C | 23.51122613 | 16.34817132  | 0.00000000 |
| C | 23.47302052 | 17.74665947  | 0.00000000 |
| C | 23.47881883 | 20.59709853  | 0.00000000 |
| C | 23.43335257 | 21.99337614  | 0.00000000 |
| C | 24.68502922 | -19.88187752 | 0.00000000 |
| C | 24.72688126 | -18.48459273 | 0.00000000 |
| C | 24.71174566 | -15.63410431 | 0.00000000 |
| C | 24.74461362 | -14.23661356 | 0.00000000 |
| C | 24.74458152 | 14.23663337  | 0.00000000 |
| C | 24.71171180 | 15.63412365  | 0.00000000 |
| C | 24.72684535 | 18.48460982  | 0.00000000 |
| C | 24.68499314 | 19.88189201  | 0.00000000 |
| C | 25.92985015 | -17.76629249 | 0.00000000 |
| C | 25.96793958 | -16.36779056 | 0.00000000 |
| C | 25.94319729 | -13.51741389 | 0.00000000 |
| C | 25.97052600 | -12.12086331 | 0.00000000 |
| C | 25.97049750 | 12.12088538  | 0.00000000 |
| C | 25.94316622 | 13.51743546  | 0.00000000 |
| C | 25.96790454 | 16.36781136  | 0.00000000 |
| C | 25.92981374 | 17.76631220  | 0.00000000 |
| C | 27.16782500 | -15.64645068 | 0.00000000 |
| C | 27.20189986 | -14.24677586 | 0.00000000 |
| C | 27.16724261 | -11.39646375 | 0.00000000 |
| C | 27.18881431 | -10.00090810 | 0.00000000 |
| C | 27.18878986 | 10.00093326  | 0.00000000 |
| C | 27.16721514 | 11.39648802  | 0.00000000 |
| C | 27.20186717 | 14.24679908  | 0.00000000 |
| C | 27.16779024 | 15.64647349  | 0.00000000 |
| C | 28.39874584 | -13.52236001 | 0.00000000 |
| C | 28.42858819 | -12.12144910 | 0.00000000 |
| C | 28.38378991 | -9.27136104  | 0.00000000 |
| C | 28.39951410 | -7.87660534  | 0.00000000 |
| C | 28.39949388 | 7.87663459   | 0.00000000 |
| C | 28.38376632 | 9.27138911   | 0.00000000 |
| C | 28.42855838 | 12.12147503  | 0.00000000 |
| C | 28.39871354 | 13.52238530  | 0.00000000 |
| C | 29.62236139 | -11.39400840 | 0.00000000 |
| C | 29.64763847 | -9.99177480  | 0.00000000 |
| C | 29.59269114 | -7.14264022  | 0.00000000 |
| C | 29.60299680 | -5.74755806  | 0.00000000 |
| C | 29.60298114 | 5.74759208   | 0.00000000 |
| C | 29.59267173 | 7.14267306   | 0.00000000 |
| C | 29.64761181 | 9.99180469   | 0.00000000 |
| C | 29.62233178 | 11.39403701  | 0.00000000 |
| C | 30.83847937 | -9.26114812  | 0.00000000 |
| C | 30.85840536 | -7.85802268  | 0.00000000 |
| C | 30.79347948 | -5.01110488  | 0.00000000 |
| C | 30.79923869 | -3.61270829  | 0.00000000 |

|   |              |              |            |
|---|--------------|--------------|------------|
| C | 30.79922813  | 3.61274732   | 0.00000000 |
| C | 30.79346483  | 5.01114299   | 0.00000000 |
| C | 30.85838242  | 7.85805778   | 0.00000000 |
| C | 30.83845287  | 9.26118146   | 0.00000000 |
| C | 32.04699373  | -7.12311426  | 0.00000000 |
| C | 32.06013520  | -5.72088582  | 0.00000000 |
| C | 31.98547372  | -2.87871298  | 0.00000000 |
| C | 31.98672083  | -1.47178196  | 0.00000000 |
| C | 31.98671589  | 1.47182553   | 0.00000000 |
| C | 31.98546448  | 2.87875611   | 0.00000000 |
| C | 32.06011698  | 5.72092682   | 0.00000000 |
| C | 32.04697133  | 7.12315347   | 0.00000000 |
| C | 33.24805583  | -4.97862693  | 0.00000000 |
| C | 33.24819273  | -3.58154751  | 0.00000000 |
| C | 33.15111930  | -0.72552731  | 0.00000000 |
| C | 33.15111664  | 0.72557515   | 0.00000000 |
| C | 33.24818038  | 3.58159419   | 0.00000000 |
| C | 33.24803882  | 4.97867228   | 0.00000000 |
| C | 34.42814802  | -2.81512282  | 0.00000000 |
| C | 34.41131859  | -1.42878374  | 0.00000000 |
| C | 34.41131361  | 1.42883541   | 0.00000000 |
| C | 34.42813778  | 2.81517393   | 0.00000000 |
| C | 35.62692528  | -0.67999386  | 0.00000000 |
| C | 35.62692274  | 0.68004975   | 0.00000000 |
| H | -36.57287028 | -1.23898534  | 0.00000000 |
| H | -36.57286662 | 1.23901518   | 0.00000000 |
| H | -35.39776236 | -3.33508859  | 0.00000000 |
| H | -35.39775212 | 3.33511451   | 0.00000000 |
| H | -34.20958234 | -5.51312889  | 0.00000000 |
| H | -34.20956607 | 5.51314985   | 0.00000000 |
| H | -33.00573805 | -7.66264921  | 0.00000000 |
| H | -33.00571670 | 7.66266579   | 0.00000000 |
| H | -31.79517722 | -9.80436172  | 0.00000000 |
| H | -31.79515187 | 9.80437486   | 0.00000000 |
| H | -31.00828459 | -0.97161543  | 0.00000000 |
| H | -31.00828242 | 0.97162895   | 0.00000000 |
| H | -30.57706932 | -11.94076352 | 0.00000000 |
| H | -30.57704075 | 11.94077499  | 0.00000000 |
| H | -29.83857103 | -3.07645456  | 0.00000000 |
| H | -29.83856389 | 3.07646552   | 0.00000000 |
| H | -29.35152295 | -14.07250780 | 0.00000000 |
| H | -29.35149131 | 14.07251934  | 0.00000000 |
| H | -28.64452869 | -5.20761239  | 0.00000000 |
| H | -28.64451652 | 5.20762039   | 0.00000000 |
| H | -28.11871477 | -16.19986532 | 0.00000000 |
| H | -28.11867993 | 16.19987781  | 0.00000000 |
| H | -27.44294724 | -7.33326470  | 0.00000000 |
| H | -27.44292976 | 7.33327054   | 0.00000000 |
| H | -26.87887605 | -18.32288387 | 0.00000000 |
| H | -26.87883832 | 18.32289664  | 0.00000000 |
| H | -26.23413255 | -9.45421377  | 0.00000000 |
| H | -26.23410943 | 9.45421848   | 0.00000000 |
| H | -25.63219443 | -20.44159265 | 0.00000000 |
| H | -25.63215531 | 20.44160355  | 0.00000000 |
| H | -25.01775819 | -11.57080523 | 0.00000000 |
| H | -25.01772918 | 11.57080998  | 0.00000000 |
| H | -24.37868149 | -22.55618294 | 0.00000000 |
| H | -24.37864340 | 22.55618960  | 0.00000000 |
| H | -23.79376225 | -13.68323671 | 0.00000000 |
| H | -23.79372761 | 13.68324248  | 0.00000000 |
| H | -23.11803995 | -24.66709284 | 0.00000000 |
| H | -23.11800486 | 24.66709438  | 0.00000000 |
| H | -22.56230051 | -15.79155059 | 0.00000000 |
| H | -22.56226155 | 15.79155753  | 0.00000000 |
| H | -21.84879747 | -26.77648593 | 0.00000000 |
| H | -21.84876556 | 26.77648300  | 0.00000000 |
| H | -21.32359972 | -17.89582928 | 0.00000000 |
| H | -21.32355885 | 17.89583619  | 0.00000000 |
| H | -20.54951955 | -28.88670006 | 0.00000000 |
| H | -20.54948877 | 28.88669451  | 0.00000000 |
| H | -20.07785679 | -19.99641646 | 0.00000000 |
| H | -20.07781682 | 19.99642111  | 0.00000000 |
| H | -19.31697790 | -30.94645166 | 0.00000000 |
| H | -19.31694431 | 30.94644445  | 0.00000000 |
| H | -18.82526385 | -22.09395216 | 0.00000000 |
| H | -18.82522680 | 22.09395244  | 0.00000000 |
| H | -17.56532895 | -24.18872314 | 0.00000000 |
| H | -17.56529499 | 24.18871807  | 0.00000000 |
| H | -17.16712751 | -32.17987118 | 0.00000000 |
| H | -17.16709597 | 32.17985952  | 0.00000000 |
| H | -16.31722062 | -26.25114392 | 0.00000000 |
| H | -16.31718773 | 26.25113431  | 0.00000000 |
| H | -14.76695607 | -32.20403242 | 0.00000000 |

|   |              |              |            |
|---|--------------|--------------|------------|
| H | -14.62841529 | -27.22039598 | 0.00000000 |
| H | -14.62839133 | 27.22037750  | 0.00000000 |
| H | -14.76692518 | 32.20401932  | 0.00000000 |
| H | -12.28933090 | -32.26051937 | 0.00000000 |
| H | -12.21801557 | -27.25650718 | 0.00000000 |
| H | -12.21799507 | 27.25648395  | 0.00000000 |
| H | -12.28930263 | 32.26050314  | 0.00000000 |
| H | -9.82815456  | -32.29151110 | 0.00000000 |
| H | -9.77337474  | -27.28686799 | 0.00000000 |
| H | -9.77335803  | 27.28683996  | 0.00000000 |
| H | -9.82813080  | 32.29149209  | 0.00000000 |
| H | -7.37042896  | -32.31494183 | 0.00000000 |
| H | -7.32963647  | -27.31009170 | 0.00000000 |
| H | -7.32962299  | 27.31005966  | 0.00000000 |
| H | -7.37040948  | 32.31492067  | 0.00000000 |
| H | -4.91348870  | -32.33134909 | 0.00000000 |
| H | -4.88639405  | -27.32684204 | 0.00000000 |
| H | -4.88638290  | 27.32680712  | 0.00000000 |
| H | -4.91347305  | 32.33132604  | 0.00000000 |
| H | -2.45674904  | -32.34108616 | 0.00000000 |
| H | -2.44323448  | -27.33694253 | 0.00000000 |
| H | -2.44322496  | 27.33690572  | 0.00000000 |
| H | -2.45673657  | 32.34106147  | 0.00000000 |
| H | 0.00000279   | -32.34431616 | 0.00000000 |
| H | 0.00000281   | -27.34031526 | 0.00000000 |
| H | 0.00001110   | 27.34027745  | 0.00000000 |
| H | 0.00001246   | 32.34429031  | 0.00000000 |
| H | 2.45675399   | -32.34108598 | 0.00000000 |
| H | 2.44323945   | -27.33694276 | 0.00000000 |
| H | 2.44324643   | 27.33690488  | 0.00000000 |
| H | 2.45676073   | 32.34105966  | 0.00000000 |
| H | 4.91349183   | -32.33134876 | 0.00000000 |
| H | 4.88639716   | -27.32684244 | 0.00000000 |
| H | 4.88640227   | 27.32680539  | 0.00000000 |
| H | 4.91349507   | 32.33132254  | 0.00000000 |
| H | 7.37042959   | -32.31494141 | 0.00000000 |
| H | 7.32963701   | -27.31009217 | 0.00000000 |
| H | 7.32963938   | 27.31005692  | 0.00000000 |
| H | 7.37042844   | 32.31491566  | 0.00000000 |
| H | 9.82815259   | -32.29151064 | 0.00000000 |
| H | 9.77337260   | -27.28686844 | 0.00000000 |
| H | 9.77337111   | 27.28683612  | 0.00000000 |
| H | 9.82814637   | 32.29148577  | 0.00000000 |
| H | 12.28932674  | -32.26051887 | 0.00000000 |
| H | 12.21801116  | -27.25650752 | 0.00000000 |
| H | 12.21800501  | 27.25647897  | 0.00000000 |
| H | 12.28931505  | 32.26049561  | 0.00000000 |
| H | 14.76695029  | -32.20403179 | 0.00000000 |
| H | 14.62840921  | -27.22039613 | 0.00000000 |
| H | 14.62839859  | 27.22037126  | 0.00000000 |
| H | 14.76693473  | 32.20401045  | 0.00000000 |
| H | 16.31721336  | -26.25114459 | 0.00000000 |
| H | 16.31719268  | 26.25112903  | 0.00000000 |
| H | 17.16712048  | -32.17987069 | 0.00000000 |
| H | 17.16710254  | 32.17985013  | 0.00000000 |
| H | 17.56532154  | -24.18872425 | 0.00000000 |
| H | 17.56529891  | 24.18871529  | 0.00000000 |
| H | 18.82525626  | -22.09395346 | 0.00000000 |
| H | 18.82522922  | 22.09395259  | 0.00000000 |
| H | 19.31697032  | -30.94645162 | 0.00000000 |
| H | 19.31694910  | 30.94643535  | 0.00000000 |
| H | 20.07784913  | -19.99641754 | 0.00000000 |
| H | 20.07781754  | 19.99642442  | 0.00000000 |
| H | 20.54951176  | -28.88670060 | 0.00000000 |
| H | 20.54949136  | 28.88668756  | 0.00000000 |
| H | 21.32359208  | -17.89582966 | 0.00000000 |
| H | 21.32355777  | 17.89584260  | 0.00000000 |
| H | 21.84878961  | -26.77648689 | 0.00000000 |
| H | 21.84876655  | 26.77647855  | 0.00000000 |
| H | 22.56229305  | -15.79154978 | 0.00000000 |
| H | 22.56225879  | 15.79156665  | 0.00000000 |
| H | 23.11803210  | -24.66709396 | 0.00000000 |
| H | 23.11800402  | 24.66709264  | 0.00000000 |
| H | 23.79375515  | -13.68323427 | 0.00000000 |
| H | 23.79372348  | 13.68325368  | 0.00000000 |
| H | 24.37867386  | -22.55618395 | 0.00000000 |
| H | 24.37864061  | 22.55619104  | 0.00000000 |
| H | 25.01775165  | -11.57080085 | 0.00000000 |
| H | 25.01772415  | 11.57082253  | 0.00000000 |
| H | 25.63218735  | -20.44159323 | 0.00000000 |
| H | 25.63215079  | 20.44160833  | 0.00000000 |
| H | 26.23412674  | -9.45420731  | 0.00000000 |
| H | 26.23410404  | 9.45423171   | 0.00000000 |

|   |             |              |            |
|---|-------------|--------------|------------|
| H | 26.87886984 | -18.32288362 | 0.00000000 |
| H | 26.87883254 | 18.32290460  | 0.00000000 |
| H | 27.44294230 | -7.33325621  | 0.00000000 |
| H | 27.44292452 | 7.33328395   | 0.00000000 |
| H | 28.11870969 | -16.19986382 | 0.00000000 |
| H | 28.11867346 | 16.19988847  | 0.00000000 |
| H | 28.64452465 | -5.20760211  | 0.00000000 |
| H | 28.64451186 | 5.20763367   | 0.00000000 |
| H | 29.35151911 | -14.07250467 | 0.00000000 |
| H | 29.35148471 | 14.07253204  | 0.00000000 |
| H | 29.83856785 | -3.07644276  | 0.00000000 |
| H | 29.83856013 | 3.07647853   | 0.00000000 |
| H | 30.57706668 | -11.94075846 | 0.00000000 |
| H | 30.57703450 | 11.94078903  | 0.00000000 |
| H | 31.00828223 | -0.97160251  | 0.00000000 |
| H | 31.00827984 | 0.97164157   | 0.00000000 |
| H | 31.79517557 | -9.80435459  | 0.00000000 |
| H | 31.79514632 | 9.80438964   | 0.00000000 |
| H | 33.00573710 | -7.66264008  | 0.00000000 |
| H | 33.00571205 | 7.66268089   | 0.00000000 |
| H | 34.20958175 | -5.51311808  | 0.00000000 |
| H | 34.20956246 | 5.51316513   | 0.00000000 |
| H | 35.39776216 | -3.33507627  | 0.00000000 |
| H | 35.39774986 | 3.33512976   | 0.00000000 |
| H | 36.57287001 | -1.23897119  | 0.00000000 |
| H | 36.57286559 | 1.23902970   | 0.00000000 |

Cartesian coordinates (in Å) for the lowest triplet states of  $n$ -HGQRs ( $n = 3$ –15), calculated by spin-unrestricted TAO-LDA.

## 3-HGQR (triplet)

|   |             |             |            |
|---|-------------|-------------|------------|
| C | -6.14982306 | -0.68663278 | 0.00000000 |
| C | -6.14982308 | 0.68663274  | 0.00000000 |
| C | -4.90915205 | -2.83459886 | 0.00000000 |
| C | -4.93905696 | -1.43288232 | 0.00000000 |
| C | -4.93905703 | 1.43288239  | 0.00000000 |
| C | -4.90915218 | 2.83459893  | 0.00000000 |
| C | -3.66975112 | -4.98350923 | 0.00000000 |
| C | -3.71052289 | -3.56172195 | 0.00000000 |
| C | -3.69813986 | -0.72017989 | 0.00000000 |
| C | -3.69813989 | 0.72018007  | 0.00000000 |
| C | -3.71052301 | 3.56172203  | 0.00000000 |
| C | -3.66975124 | 4.98350938  | 0.00000000 |
| C | -2.48057993 | -5.67023351 | 0.00000000 |
| C | -2.47285770 | -2.84346777 | 0.00000000 |
| C | -2.51470237 | -1.45238588 | 0.00000000 |
| C | -2.51470249 | 1.45238606  | 0.00000000 |
| C | -2.47285782 | 2.84346785  | 0.00000000 |
| C | -2.48057998 | 5.67023365  | 0.00000000 |
| C | -1.22889468 | -4.99484708 | 0.00000000 |
| C | -1.22563148 | -3.56369226 | 0.00000000 |
| C | -1.22563164 | 3.56369229  | 0.00000000 |
| C | -1.22889472 | 4.99484713  | 0.00000000 |
| C | 0.00000001  | -5.66959022 | 0.00000000 |
| C | 0.00000008  | -2.90457827 | 0.00000000 |
| C | -0.00000011 | 2.90457829  | 0.00000000 |
| C | 0.00000001  | 5.66959026  | 0.00000000 |
| C | 1.22889472  | -4.99484708 | 0.00000000 |
| C | 1.22563164  | -3.56369225 | 0.00000000 |
| C | 1.22563148  | 3.56369225  | 0.00000000 |
| C | 1.22889469  | 4.99484707  | 0.00000000 |
| C | 2.48057997  | -5.67023361 | 0.00000000 |
| C | 2.47285783  | -2.84346782 | 0.00000000 |
| C | 2.51470250  | -1.45238603 | 0.00000000 |
| C | 2.51470239  | 1.45238588  | 0.00000000 |
| C | 2.47285770  | 2.84346776  | 0.00000000 |
| C | 2.48057993  | 5.67023347  | 0.00000000 |
| C | 3.66975123  | -4.98350935 | 0.00000000 |
| C | 3.71052300  | -3.56172201 | 0.00000000 |
| C | 3.69813991  | -0.72018007 | 0.00000000 |
| C | 3.69813988  | 0.72017989  | 0.00000000 |
| C | 3.71052289  | 3.56172193  | 0.00000000 |
| C | 3.66975113  | 4.98350921  | 0.00000000 |
| C | 4.90915218  | -2.83459893 | 0.00000000 |
| C | 4.93905703  | -1.43288241 | 0.00000000 |
| C | 4.93905697  | 1.43288231  | 0.00000000 |
| C | 4.90915205  | 2.83459883  | 0.00000000 |
| C | 6.14982309  | -0.68663278 | 0.00000000 |
| C | 6.14982305  | 0.68663273  | 0.00000000 |
| H | -7.09975392 | -1.23864117 | 0.00000000 |
| H | -7.09975401 | 1.23864108  | 0.00000000 |
| H | -5.86205336 | -3.38464067 | 0.00000000 |
| H | -5.86205351 | 3.38464073  | 0.00000000 |
| H | -4.62276553 | -5.53019395 | 0.00000000 |
| H | -4.62276566 | 5.53019415  | 0.00000000 |
| H | -2.47748406 | -6.76889749 | 0.00000000 |
| H | -2.47748410 | 6.76889765  | 0.00000000 |
| H | -1.56673530 | -0.90567733 | 0.00000000 |
| H | -1.56673543 | 0.90567751  | 0.00000000 |
| H | 0.00000003  | -6.76983452 | 0.00000000 |
| H | 0.00000007  | -1.81027039 | 0.00000000 |
| H | -0.00000014 | 1.81027041  | 0.00000000 |
| H | 0.00000002  | 6.76983455  | 0.00000000 |
| H | 1.56673544  | -0.90567747 | 0.00000000 |
| H | 1.56673533  | 0.90567732  | 0.00000000 |
| H | 2.47748407  | -6.76889761 | 0.00000000 |
| H | 2.47748408  | 6.76889745  | 0.00000000 |
| H | 4.62276564  | -5.53019413 | 0.00000000 |
| H | 4.62276554  | 5.53019393  | 0.00000000 |
| H | 5.86205351  | -3.38464074 | 0.00000000 |
| H | 5.86205334  | 3.38464065  | 0.00000000 |
| H | 7.09975400  | -1.23864110 | 0.00000000 |
| H | 7.09975393  | 1.23864111  | 0.00000000 |

## 4-HGQR (triplet)

|   |             |             |            |
|---|-------------|-------------|------------|
| C | -8.59866514 | -0.68298084 | 0.00000000 |
| C | -8.59866502 | 0.68298185  | 0.00000000 |
| C | -7.38612152 | -2.82945633 | 0.00000000 |
| C | -7.38613360 | -1.43387689 | 0.00000000 |
| C | -7.38613336 | 1.43387768  | 0.00000000 |

|   |             |             |            |
|---|-------------|-------------|------------|
| C | -7.38612115 | 2.82945705  | 0.00000000 |
| C | -6.14332343 | -4.98237197 | 0.00000000 |
| C | -6.19595715 | -3.57754371 | 0.00000000 |
| C | -6.13710463 | -0.72274582 | 0.00000000 |
| C | -6.13710453 | 0.72274644  | 0.00000000 |
| C | -6.19595681 | 3.57754423  | 0.00000000 |
| C | -6.14332286 | 4.98237231  | 0.00000000 |
| C | -4.89074652 | -7.10558005 | 0.00000000 |
| C | -4.93468765 | -5.67998096 | 0.00000000 |
| C | -4.95166390 | -2.85907458 | 0.00000000 |
| C | -4.96241364 | -1.45895401 | 0.00000000 |
| C | -4.96241351 | 1.45895448  | 0.00000000 |
| C | -4.95166373 | 2.85907498  | 0.00000000 |
| C | -4.93468711 | 5.67998099  | 0.00000000 |
| C | -4.89074590 | 7.10557988  | 0.00000000 |
| C | -3.70792793 | -7.78866469 | 0.00000000 |
| C | -3.69434172 | -4.95372022 | 0.00000000 |
| C | -3.74441569 | -3.56817408 | 0.00000000 |
| C | -3.74441550 | 3.56817419  | 0.00000000 |
| C | -3.69434140 | 4.95372018  | 0.00000000 |
| C | -3.70792737 | 7.78866430  | 0.00000000 |
| C | -2.45139211 | -7.11401920 | 0.00000000 |
| C | -2.44269801 | -5.67658548 | 0.00000000 |
| C | -2.44269775 | 5.67658520  | 0.00000000 |
| C | -2.45139181 | 7.11401876  | 0.00000000 |
| C | -1.24291558 | -7.81190652 | 0.00000000 |
| C | -1.21778702 | -5.02739645 | 0.00000000 |
| C | -1.21778702 | 5.02739610  | 0.00000000 |
| C | -1.24291545 | 7.81190593  | 0.00000000 |
| C | -0.00000003 | -7.15521051 | 0.00000000 |
| C | 0.00000002  | -5.71821612 | 0.00000000 |
| C | -0.00000014 | 5.71821568  | 0.00000000 |
| C | -0.00000016 | 7.15520991  | 0.00000000 |
| C | 1.24291545  | -7.81190665 | 0.00000000 |
| C | 1.21778712  | -5.02739654 | 0.00000000 |
| C | 1.21778676  | 5.02739611  | 0.00000000 |
| C | 1.24291516  | 7.81190592  | 0.00000000 |
| C | 2.45139204  | -7.11401942 | 0.00000000 |
| C | 2.44269806  | -5.67658568 | 0.00000000 |
| C | 2.44269753  | 5.67658520  | 0.00000000 |
| C | 2.45139156  | 7.11401878  | 0.00000000 |
| C | 3.70792785  | -7.78866495 | 0.00000000 |
| C | 3.69434182  | -4.95372050 | 0.00000000 |
| C | 3.74441588  | -3.56817433 | 0.00000000 |
| C | 3.74441534  | 3.56817413  | 0.00000000 |
| C | 3.69434121  | 4.95372017  | 0.00000000 |
| C | 3.70792713  | 7.78866440  | 0.00000000 |
| C | 4.89074650  | -7.10558037 | 0.00000000 |
| C | 4.93468775  | -5.67998128 | 0.00000000 |
| C | 4.95166416  | -2.85907488 | 0.00000000 |
| C | 4.96241383  | -1.45895425 | 0.00000000 |
| C | 4.96241354  | 1.45895434  | 0.00000000 |
| C | 4.95166360  | 2.85907488  | 0.00000000 |
| C | 4.93468694  | 5.67998103  | 0.00000000 |
| C | 4.89074570  | 7.10557999  | 0.00000000 |
| C | 6.14332361  | -4.98237235 | 0.00000000 |
| C | 6.19595744  | -3.57754407 | 0.00000000 |
| C | 6.13710481  | -0.72274596 | 0.00000000 |
| C | 6.13710467  | 0.72274635  | 0.00000000 |
| C | 6.19595670  | 3.57754417  | 0.00000000 |
| C | 6.14332275  | 4.98237232  | 0.00000000 |
| C | 7.38612179  | -2.82945660 | 0.00000000 |
| C | 7.38613380  | -1.43387709 | 0.00000000 |
| C | 7.38613353  | 1.43387764  | 0.00000000 |
| C | 7.38612118  | 2.82945705  | 0.00000000 |
| C | 8.59866537  | -0.68298097 | 0.00000000 |
| C | 8.59866523  | 0.68298177  | 0.00000000 |
| H | -9.54729826 | -1.23736424 | 0.00000000 |
| H | -9.54729804 | 1.23736537  | 0.00000000 |
| H | -8.34992773 | -3.35993023 | 0.00000000 |
| H | -8.34992740 | 3.35993075  | 0.00000000 |
| H | -7.08449508 | -5.55209214 | 0.00000000 |
| H | -7.08449435 | 5.55209262  | 0.00000000 |
| H | -5.84520779 | -7.64986444 | 0.00000000 |
| H | -5.84520703 | 7.64986435  | 0.00000000 |
| H | -3.98812979 | -0.95213024 | 0.00000000 |
| H | -3.98812973 | 0.95213060  | 0.00000000 |
| H | -3.70212902 | -8.88738533 | 0.00000000 |
| H | -3.70212841 | 8.88738484  | 0.00000000 |
| H | -2.81835423 | -2.97774407 | 0.00000000 |
| H | -2.81835422 | 2.97774402  | 0.00000000 |
| H | -1.26559938 | -8.91181611 | 0.00000000 |
| H | -1.16978014 | -3.93024373 | 0.00000000 |

|   |             |             |            |
|---|-------------|-------------|------------|
| H | -1.16978023 | 3.93024345  | 0.00000000 |
| H | -1.26559922 | 8.91181541  | 0.00000000 |
| H | 1.26559921  | -8.91181624 | 0.00000000 |
| H | 1.16978033  | -3.93024380 | 0.00000000 |
| H | 1.16978000  | 3.93024346  | 0.00000000 |
| H | 1.26559890  | 8.91181540  | 0.00000000 |
| H | 2.81835446  | -2.97774421 | 0.00000000 |
| H | 2.81835404  | 2.97774397  | 0.00000000 |
| H | 3.70212895  | -8.88738560 | 0.00000000 |
| H | 3.70212809  | 8.88738496  | 0.00000000 |
| H | 3.98812993  | -0.95213053 | 0.00000000 |
| H | 3.98812981  | 0.95213035  | 0.00000000 |
| H | 5.84520773  | -7.64986487 | 0.00000000 |
| H | 5.84520686  | 7.64986444  | 0.00000000 |
| H | 7.08449523  | -5.55209263 | 0.00000000 |
| H | 7.08449428  | 5.55209261  | 0.00000000 |
| H | 8.34992818  | -3.35993023 | 0.00000000 |
| H | 8.34992729  | 3.35993109  | 0.00000000 |
| H | 9.54729853  | -1.23736437 | 0.00000000 |
| H | 9.54729828  | 1.23736531  | 0.00000000 |

## 5-HGQR (triplet)

|   |              |             |            |
|---|--------------|-------------|------------|
| C | -11.04918206 | -0.68123796 | 0.00000000 |
| C | -11.04918183 | 0.68124209  | 0.00000000 |
| C | -9.84194142  | -2.82392429 | 0.00000000 |
| C | -9.83495372  | -1.43351249 | 0.00000000 |
| C | -9.83495343  | 1.43351628  | 0.00000000 |
| C | -9.84194092  | 2.82392756  | 0.00000000 |
| C | -8.63250445  | -4.98413267 | 0.00000000 |
| C | -8.65554199  | -3.58296191 | 0.00000000 |
| C | -8.58151756  | -0.72449356 | 0.00000000 |
| C | -8.58151749  | 0.72449737  | 0.00000000 |
| C | -8.65554187  | 3.58296465  | 0.00000000 |
| C | -8.63250443  | 4.98413460  | 0.00000000 |
| C | -7.36611072  | -7.11115910 | 0.00000000 |
| C | -7.43035168  | -5.70417246 | 0.00000000 |
| C | -7.40262791  | -2.86650220 | 0.00000000 |
| C | -7.41194139  | -1.46234007 | 0.00000000 |
| C | -7.41194145  | 1.46234347  | 0.00000000 |
| C | -7.40262826  | 2.86650515  | 0.00000000 |
| C | -7.43035225  | 5.70417372  | 0.00000000 |
| C | -7.36611141  | 7.11115953  | 0.00000000 |
| C | -6.11403953  | -9.22766459 | 0.00000000 |
| C | -6.15836087  | -7.79993419 | 0.00000000 |
| C | -6.18360747  | -4.97694444 | 0.00000000 |
| C | -6.20565733  | -3.58234811 | 0.00000000 |
| C | -6.20565817  | 3.58235052  | 0.00000000 |
| C | -6.18360862  | 4.97694610  | 0.00000000 |
| C | -6.15836228  | 7.79993419  | 0.00000000 |
| C | -6.11404134  | 9.22766399  | 0.00000000 |
| C | -4.93420596  | -9.90892385 | 0.00000000 |
| C | -4.91772340  | -7.06861376 | 0.00000000 |
| C | -4.97201395  | -5.68667509 | 0.00000000 |
| C | -4.97201559  | 5.68667606  | 0.00000000 |
| C | -4.91772540  | 7.06861398  | 0.00000000 |
| C | -4.93420834  | 9.90892318  | 0.00000000 |
| C | -3.67571165  | -9.23337488 | 0.00000000 |
| C | -3.66298874  | -7.79316255 | 0.00000000 |
| C | -3.66299129  | 7.79316258  | 0.00000000 |
| C | -3.67571449  | 9.23337441  | 0.00000000 |
| C | -2.47525601  | -9.93478258 | 0.00000000 |
| C | -2.43914027  | -7.14932694 | 0.00000000 |
| C | -2.43914326  | 7.14932722  | 0.00000000 |
| C | -2.47525937  | 9.93478218  | 0.00000000 |
| C | -1.22471004  | -9.28693335 | 0.00000000 |
| C | -1.21856977  | -7.84346837 | 0.00000000 |
| C | -1.21857320  | 7.84346865  | 0.00000000 |
| C | -1.22471357  | 9.28693334  | 0.00000000 |
| C | 0.00000264   | -9.96782498 | 0.00000000 |
| C | 0.00000217   | -7.16499915 | 0.00000000 |
| C | -0.00000138  | 7.16499955  | 0.00000000 |
| C | -0.00000116  | 9.96782514  | 0.00000000 |
| C | 1.22471494   | -9.28693275 | 0.00000000 |
| C | 1.21857422   | -7.84346797 | 0.00000000 |
| C | 1.21857062   | 7.84346840  | 0.00000000 |
| C | 1.22471124   | 9.28693323  | 0.00000000 |
| C | 2.47526094   | -9.93478126 | 0.00000000 |
| C | 2.43914411   | -7.14932627 | 0.00000000 |
| C | 2.43914077   | 7.14932666  | 0.00000000 |
| C | 2.47525727   | 9.93478201  | 0.00000000 |
| C | 3.67571581   | -9.23337308 | 0.00000000 |
| C | 3.66299220   | -7.79316134 | 0.00000000 |
| C | 3.66298929   | 7.79316185  | 0.00000000 |
| C | 3.67571257   | 9.23337404  | 0.00000000 |

|   |              |              |            |
|---|--------------|--------------|------------|
| C | 4.93420970   | -9.90892150  | 0.00000000 |
| C | 4.91772595   | -7.06861251  | 0.00000000 |
| C | 4.97201563   | -5.68667490  | 0.00000000 |
| C | 4.97201407   | 5.68667427   | 0.00000000 |
| C | 4.91772372   | 7.06861281   | 0.00000000 |
| C | 4.93420689   | 9.90892272   | 0.00000000 |
| C | 6.11404232   | -9.22766201  | 0.00000000 |
| C | 6.15836273   | -7.79993241  | 0.00000000 |
| C | 6.18360836   | -4.97694505  | 0.00000000 |
| C | 6.20565758   | -3.58234989  | 0.00000000 |
| C | 6.20565697   | 3.58234733   | 0.00000000 |
| C | 6.18360734   | 4.97694351   | 0.00000000 |
| C | 6.15836121   | 7.79993299   | 0.00000000 |
| C | 6.11404020   | 9.22766327   | 0.00000000 |
| C | 7.36611137   | -7.11115774  | 0.00000000 |
| C | 7.43035181   | -5.70417234  | 0.00000000 |
| C | 7.40262734   | -2.86650479  | 0.00000000 |
| C | 7.41194030   | -1.46234351  | 0.00000000 |
| C | 7.41194044   | 1.46233939   | 0.00000000 |
| C | 7.40262725   | 2.86650130   | 0.00000000 |
| C | 7.43035154   | 5.70417123   | 0.00000000 |
| C | 7.36611083   | 7.11115776   | 0.00000000 |
| C | 8.63250354   | -4.98413347  | 0.00000000 |
| C | 8.65554066   | -3.58296403  | 0.00000000 |
| C | 8.58151608   | -0.72449776  | 0.00000000 |
| C | 8.58151628   | 0.72449290   | 0.00000000 |
| C | 8.65554128   | 3.58296073   | 0.00000000 |
| C | 8.63250407   | 4.98413134   | 0.00000000 |
| C | 9.84193932   | -2.82392724  | 0.00000000 |
| C | 9.83495178   | -1.43351645  | 0.00000000 |
| C | 9.83495237   | 1.43351145   | 0.00000000 |
| C | 9.84194039   | 2.82392299   | 0.00000000 |
| C | 11.04918006  | -0.68124270  | 0.00000000 |
| C | 11.04918046  | 0.68123703   | 0.00000000 |
| H | -11.99698028 | -1.23710314  | 0.00000000 |
| H | -11.99697992 | 1.23710723   | 0.00000000 |
| H | -10.80828945 | -3.34987642  | 0.00000000 |
| H | -10.80828872 | 3.34987946   | 0.00000000 |
| H | -9.58493978  | -5.53453504  | 0.00000000 |
| H | -9.58493941  | 5.53453674   | 0.00000000 |
| H | -8.30459919  | -7.68539542  | 0.00000000 |
| H | -8.30459951  | 7.68539567   | 0.00000000 |
| H | -7.06935274  | -9.77049929  | 0.00000000 |
| H | -7.06935432  | 9.77049846   | 0.00000000 |
| H | -6.43603344  | -0.95827768  | 0.00000000 |
| H | -6.43603373  | 0.95828077   | 0.00000000 |
| H | -5.25302134  | -3.03188146  | 0.00000000 |
| H | -5.25302247  | 3.03188392   | 0.00000000 |
| H | -4.92660609  | -11.00765700 | 0.00000000 |
| H | -4.92660849  | 11.00765611  | 0.00000000 |
| H | -4.04763335  | -5.09332673  | 0.00000000 |
| H | -4.04763522  | 5.09332796   | 0.00000000 |
| H | -2.50315363  | -11.03463062 | 0.00000000 |
| H | -2.38770235  | -6.05215890  | 0.00000000 |
| H | -2.38770503  | 6.05215945   | 0.00000000 |
| H | -2.50315708  | 11.03463005  | 0.00000000 |
| H | 0.00000281   | -11.06783824 | 0.00000000 |
| H | 0.00000184   | -6.06479855  | 0.00000000 |
| H | -0.00000141  | 6.06479899   | 0.00000000 |
| H | -0.00000112  | 11.06783831  | 0.00000000 |
| H | 2.50315890   | -11.03462916 | 0.00000000 |
| H | 2.38770554   | -6.05215855  | 0.00000000 |
| H | 2.38770249   | 6.05215874   | 0.00000000 |
| H | 2.50315523   | 11.03462993  | 0.00000000 |
| H | 4.04763512   | -5.09332717  | 0.00000000 |
| H | 4.04763350   | 5.09332612   | 0.00000000 |
| H | 4.92661005   | -11.00765441 | 0.00000000 |
| H | 4.92660728   | 11.00765577  | 0.00000000 |
| H | 5.25302198   | -3.03188351  | 0.00000000 |
| H | 5.25302100   | 3.03188095   | 0.00000000 |
| H | 6.43603278   | -0.95828085  | 0.00000000 |
| H | 6.43603255   | 0.95827727   | 0.00000000 |
| H | 7.06935533   | -9.77049616  | 0.00000000 |
| H | 7.06935346   | 9.77049773   | 0.00000000 |
| H | 8.30459937   | -7.68539365  | 0.00000000 |
| H | 8.30459931   | 7.68539386   | 0.00000000 |
| H | 9.58493836   | -5.53453539  | 0.00000000 |
| H | 9.58493940   | 5.53453348   | 0.00000000 |
| H | 10.80828693  | -3.34987900  | 0.00000000 |
| H | 10.80828840  | 3.34987489   | 0.00000000 |
| H | 11.99697791  | -1.23710786  | 0.00000000 |
| H | 11.99697858  | 1.23710210   | 0.00000000 |

6-HGQR (triplet)

|   |              |              |            |
|---|--------------|--------------|------------|
| C | -13.49915371 | -0.68054052  | 0.00000000 |
| C | -13.49915430 | 0.68053414   | 0.00000000 |
| C | -12.29551731 | -2.82075520  | 0.00000000 |
| C | -12.28454162 | -1.43326805  | 0.00000000 |
| C | -12.28454278 | 1.43326271   | 0.00000000 |
| C | -12.29551957 | 2.82075012   | 0.00000000 |
| C | -11.09572552 | -4.98172126  | 0.00000000 |
| C | -11.11051380 | -3.58412449  | 0.00000000 |
| C | -11.02777254 | -0.72534202  | 0.00000000 |
| C | -11.02777311 | 0.72533753   | 0.00000000 |
| C | -11.11051643 | 3.58412057   | 0.00000000 |
| C | -11.09572902 | 4.98171784   | 0.00000000 |
| C | -9.86183726  | -7.11728529  | 0.00000000 |
| C | -9.89764688  | -5.71371231  | 0.00000000 |
| C | -9.85362122  | -2.87099411  | 0.00000000 |
| C | -9.86123121  | -1.46461697  | 0.00000000 |
| C | -9.86123223  | 1.46461352   | 0.00000000 |
| C | -9.85362310  | 2.87099090   | 0.00000000 |
| C | -9.89765054  | 5.71371015   | 0.00000000 |
| C | -9.86184169  | 7.11728377   | 0.00000000 |
| C | -8.58954588  | -9.23592878  | 0.00000000 |
| C | -8.65847811  | -7.82803515  | 0.00000000 |
| C | -8.64167618  | -4.98805232  | 0.00000000 |
| C | -8.66133626  | -3.58983949  | 0.00000000 |
| C | -8.66133833  | 3.58983741   | 0.00000000 |
| C | -8.64167902  | 4.98805073   | 0.00000000 |
| C | -8.65848257  | 7.82803496   | 0.00000000 |
| C | -8.58955107  | 9.23592931   | 0.00000000 |
| C | -7.33759536  | -11.34781631 | 0.00000000 |
| C | -7.38221787  | -9.91954802  | 0.00000000 |
| C | -7.41281000  | -7.09539273  | 0.00000000 |
| C | -7.44017796  | -5.70334616  | 0.00000000 |
| C | -7.44018085  | 5.70334574   | 0.00000000 |
| C | -7.41281358  | 7.09539296   | 0.00000000 |
| C | -7.38222289  | 9.91954972   | 0.00000000 |
| C | -7.33760062  | 11.34781867  | 0.00000000 |
| C | -6.15892190  | -12.02823624 | 0.00000000 |
| C | -6.14096749  | -9.18456517  | 0.00000000 |
| C | -6.19828939  | -7.80453453  | 0.00000000 |
| C | -6.19829294  | 7.80453596   | 0.00000000 |
| C | -6.14097154  | 9.18456737   | 0.00000000 |
| C | -6.15892683  | 12.02823944  | 0.00000000 |
| C | -4.89995108  | -11.35240499 | 0.00000000 |
| C | -4.88467688  | -9.90983485  | 0.00000000 |
| C | -4.88468068  | 9.90983783   | 0.00000000 |
| C | -4.89995499  | 11.35240863  | 0.00000000 |
| C | -3.70403041  | -12.05577873 | 0.00000000 |
| C | -3.66108000  | -9.26933825  | 0.00000000 |
| C | -3.66108278  | 9.26934130   | 0.00000000 |
| C | -3.70403356  | 12.05578296  | 0.00000000 |
| C | -2.45046498  | -11.41129613 | 0.00000000 |
| C | -2.43941125  | -9.96605775  | 0.00000000 |
| C | -2.43941324  | 9.96606109   | 0.00000000 |
| C | -2.45046714  | 11.41130025  | 0.00000000 |
| C | -1.23308364  | -12.09767152 | 0.00000000 |
| C | -1.22048004  | -9.29327728  | 0.00000000 |
| C | -1.22048103  | 9.29328043   | 0.00000000 |
| C | -1.23308475  | 12.09767591  | 0.00000000 |
| C | -0.00000030  | -11.42644439 | 0.00000000 |
| C | -0.00000020  | -9.97574044  | 0.00000000 |
| C | -0.00000025  | 9.97574383   | 0.00000000 |
| C | -0.00000032  | 11.42644857  | 0.00000000 |
| C | 1.23308297   | -12.09767167 | 0.00000000 |
| C | 1.22047972   | -9.29327746  | 0.00000000 |
| C | 1.22048060   | 9.29328057   | 0.00000000 |
| C | 1.23308404   | 12.09767602  | 0.00000000 |
| C | 2.45046441   | -11.41129643 | 0.00000000 |
| C | 2.43941086   | -9.96605806  | 0.00000000 |
| C | 2.43941277   | 9.96606136   | 0.00000000 |
| C | 2.45046653   | 11.41130050  | 0.00000000 |
| C | 3.70402981   | -12.05577915 | 0.00000000 |
| C | 3.66107971   | -9.26933872  | 0.00000000 |
| C | 3.66108238   | 9.26934170   | 0.00000000 |
| C | 3.70403293   | 12.05578329  | 0.00000000 |
| C | 4.89995061   | -11.35240554 | 0.00000000 |
| C | 4.88467657   | -9.90983539  | 0.00000000 |
| C | 4.88468031   | 9.90983824   | 0.00000000 |
| C | 4.89995447   | 11.35240906  | 0.00000000 |
| C | 6.15892137   | -12.02823695 | 0.00000000 |
| C | 6.14096733   | -9.18456579  | 0.00000000 |
| C | 6.19828947   | -7.80453514  | 0.00000000 |
| C | 6.19829300   | 7.80453644   | 0.00000000 |
| C | 6.14097133   | 9.18456786   | 0.00000000 |

|   |              |              |            |
|---|--------------|--------------|------------|
| C | 6.15892625   | 12.02824001  | 0.00000000 |
| C | 7.33759493   | -11.34781713 | 0.00000000 |
| C | 7.38221764   | -9.91954879  | 0.00000000 |
| C | 7.41281018   | -7.09539338  | 0.00000000 |
| C | 7.44017833   | -5.70334678  | 0.00000000 |
| C | 7.44018123   | 5.70334629   | 0.00000000 |
| C | 7.41281375   | 7.09539353   | 0.00000000 |
| C | 7.38222260   | 9.91955036   | 0.00000000 |
| C | 7.33760013   | 11.34781935  | 0.00000000 |
| C | 8.58954574   | -9.23592960  | 0.00000000 |
| C | 8.65847822   | -7.82803589  | 0.00000000 |
| C | 8.64167659   | -4.98805289  | 0.00000000 |
| C | 8.66133683   | -3.58984000  | 0.00000000 |
| C | 8.66133891   | 3.58983790   | 0.00000000 |
| C | 8.64167944   | 4.98805125   | 0.00000000 |
| C | 8.65848265   | 7.82803562   | 0.00000000 |
| C | 8.58955087   | 9.23593003   | 0.00000000 |
| C | 9.86183743   | -7.11728600  | 0.00000000 |
| C | 9.89764724   | -5.71371291  | 0.00000000 |
| C | 9.85362178   | -2.87099451  | 0.00000000 |
| C | 9.86123181   | -1.46461732  | 0.00000000 |
| C | 9.86123282   | 1.46461386   | 0.00000000 |
| C | 9.85362367   | 2.87099129   | 0.00000000 |
| C | 9.89765090   | 5.71371072   | 0.00000000 |
| C | 9.86184183   | 7.11728443   | 0.00000000 |
| C | 11.09572593  | -4.98172172  | 0.00000000 |
| C | 11.11051434  | -3.58412488  | 0.00000000 |
| C | 11.02777304  | -0.72534211  | 0.00000000 |
| C | 11.02777361  | 0.72533764   | 0.00000000 |
| C | 11.11051695  | 3.58412094   | 0.00000000 |
| C | 11.09572942  | 4.98171828   | 0.00000000 |
| C | 12.29551782  | -2.82075536  | 0.00000000 |
| C | 12.28454217  | -1.43326813  | 0.00000000 |
| C | 12.28454332  | 1.43326281   | 0.00000000 |
| C | 12.29552007  | 2.82075030   | 0.00000000 |
| C | 13.49915430  | -0.68054052  | 0.00000000 |
| C | 13.49915488  | 0.68053419   | 0.00000000 |
| H | -14.44654259 | -1.23711700  | 0.00000000 |
| H | -14.44654365 | 1.23710998   | 0.00000000 |
| H | -13.26303824 | -3.34457574  | 0.00000000 |
| H | -13.26304101 | 3.34457011   | 0.00000000 |
| H | -12.05141847 | -5.52650349  | 0.00000000 |
| H | -12.05142256 | 5.52649961   | 0.00000000 |
| H | -10.81090174 | -7.67353317  | 0.00000000 |
| H | -10.81090683 | 7.67353120   | 0.00000000 |
| H | -9.52669275  | -9.81237519  | 0.00000000 |
| H | -9.52669859  | 9.81237535   | 0.00000000 |
| H | -8.88433152  | -0.96208725  | 0.00000000 |
| H | -8.88433202  | 0.96208466   | 0.00000000 |
| H | -8.29328267  | -11.89000057 | 0.00000000 |
| H | -8.29328838  | 11.89000286  | 0.00000000 |
| H | -7.70626907  | -3.04379682  | 0.00000000 |
| H | -7.70627049  | 3.04379540   | 0.00000000 |
| H | -6.49031278  | -5.14833086  | 0.00000000 |
| H | -6.49031495  | 5.14833093   | 0.00000000 |
| H | -6.15034806  | -13.12696696 | 0.00000000 |
| H | -6.15035349  | 13.12697059  | 0.00000000 |
| H | -5.27486393  | -7.20937720  | 0.00000000 |
| H | -5.27486674  | 7.20937890   | 0.00000000 |
| H | -3.73432771  | -13.15557777 | 0.00000000 |
| H | -3.60777071  | -8.17208148  | 0.00000000 |
| H | -3.60777311  | 8.17208403   | 0.00000000 |
| H | -3.73433095  | 13.15558251  | 0.00000000 |
| H | -1.23970632  | -13.19769200 | 0.00000000 |
| H | -1.21522023  | -8.19318287  | 0.00000000 |
| H | -1.21522115  | 8.19318543   | 0.00000000 |
| H | -1.23970739  | 13.19769697  | 0.00000000 |
| H | 1.23970550   | -13.19769215 | 0.00000000 |
| H | 1.21522000   | -8.19318305  | 0.00000000 |
| H | 1.21522080   | 8.19318559   | 0.00000000 |
| H | 1.23970656   | 13.19769709  | 0.00000000 |
| H | 3.73432696   | -13.15557818 | 0.00000000 |
| H | 3.60777044   | -8.17208199  | 0.00000000 |
| H | 3.60777269   | 8.17208447   | 0.00000000 |
| H | 3.73433020   | 13.15558283  | 0.00000000 |
| H | 5.27486409   | -7.20937776  | 0.00000000 |
| H | 5.27486692   | 7.20937931   | 0.00000000 |
| H | 6.15034737   | -13.12696767 | 0.00000000 |
| H | 6.15035276   | 13.12697115  | 0.00000000 |
| H | 6.49031320   | -5.14833148  | 0.00000000 |
| H | 6.49031539   | 5.14833148   | 0.00000000 |
| H | 7.70626970   | -3.04379734  | 0.00000000 |
| H | 7.70627115   | 3.04379589   | 0.00000000 |

|   |             |              |            |
|---|-------------|--------------|------------|
| H | 8.29328216  | -11.89000151 | 0.00000000 |
| H | 8.29328779  | 11.89000366  | 0.00000000 |
| H | 8.88433213  | -0.96208775  | 0.00000000 |
| H | 8.88433264  | 0.96208516   | 0.00000000 |
| H | 9.52669249  | -9.81237614  | 0.00000000 |
| H | 9.52669826  | 9.81237622   | 0.00000000 |
| H | 10.81090181 | -7.67353395  | 0.00000000 |
| H | 10.81090686 | 7.67353195   | 0.00000000 |
| H | 12.05141885 | -5.52650391  | 0.00000000 |
| H | 12.05142292 | 5.52650001   | 0.00000000 |
| H | 13.26303876 | -3.34457581  | 0.00000000 |
| H | 13.26304151 | 3.34457021   | 0.00000000 |
| H | 14.44654315 | -1.23711700  | 0.00000000 |
| H | 14.44654420 | 1.23711003   | 0.00000000 |

## 7-HGQR (triplet)

|   |              |              |            |
|---|--------------|--------------|------------|
| C | -15.95006779 | -0.68039520  | 0.00000000 |
| C | -15.95006832 | 0.68038863   | 0.00000000 |
| C | -14.74842494 | -2.81899230  | 0.00000000 |
| C | -14.73551676 | -1.43254159  | 0.00000000 |
| C | -14.73551787 | 1.43253594   | 0.00000000 |
| C | -14.74842695 | 2.81898681   | 0.00000000 |
| C | -13.55456381 | -4.98044631  | 0.00000000 |
| C | -13.56468124 | -3.58422959  | 0.00000000 |
| C | -13.47699018 | -0.72543942  | 0.00000000 |
| C | -13.47699069 | 0.72543457   | 0.00000000 |
| C | -13.56468360 | 3.58422507   | 0.00000000 |
| C | -13.55456692 | 4.98044211   | 0.00000000 |
| C | -12.33058067 | -7.11767638  | 0.00000000 |
| C | -12.35864429 | -5.71690654  | 0.00000000 |
| C | -12.30536878 | -2.87344169  | 0.00000000 |
| C | -12.31169903 | -1.46634117  | 0.00000000 |
| C | -12.31169996 | 1.46633712   | 0.00000000 |
| C | -12.30537053 | 2.87343783   | 0.00000000 |
| C | -12.35864758 | 5.71690341   | 0.00000000 |
| C | -12.33058452 | 7.11767370   | 0.00000000 |
| C | -11.08965079 | -9.24494981  | 0.00000000 |
| C | -11.13080263 | -7.84105832  | 0.00000000 |
| C | -11.09857757 | -4.99478635  | 0.00000000 |
| C | -11.11540685 | -3.59518738  | 0.00000000 |
| C | -11.11540888 | 3.59518442   | 0.00000000 |
| C | -11.09858023 | 4.99478374   | 0.00000000 |
| C | -11.13080653 | 7.84105669   | 0.00000000 |
| C | -11.08965509 | 9.24494873   | 0.00000000 |
| C | -9.81346673  | -11.35824889 | 0.00000000 |
| C | -9.88494288  | -9.95055743  | 0.00000000 |
| C | -9.87610862  | -7.10964055  | 0.00000000 |
| C | -9.90165814  | -5.71361792  | 0.00000000 |
| C | -9.90166095  | 5.71361624   | 0.00000000 |
| C | -9.87611195  | 7.10963932   | 0.00000000 |
| C | -9.88494716  | 9.95055729   | 0.00000000 |
| C | -9.81347118  | 11.35824932  | 0.00000000 |
| C | -8.56163148  | -13.46730655 | 0.00000000 |
| C | -8.60593627  | -12.03939910 | 0.00000000 |
| C | -8.64029247  | -9.21430474  | 0.00000000 |
| C | -8.67175338  | -7.82281076  | 0.00000000 |
| C | -8.67175674  | 7.82281047   | 0.00000000 |
| C | -8.64029619  | 9.21430492   | 0.00000000 |
| C | -8.60594060  | 12.03940039  | 0.00000000 |
| C | -8.56163623  | 13.46730830  | 0.00000000 |
| C | -7.38312636  | -14.14739610 | 0.00000000 |
| C | -7.36465971  | -11.30221228 | 0.00000000 |
| C | -7.42433173  | -9.92244721  | 0.00000000 |
| C | -7.42433539  | 9.92244827   | 0.00000000 |
| C | -7.36466346  | 11.30221375  | 0.00000000 |
| C | -7.38313097  | 14.14739844  | 0.00000000 |
| C | -6.12482495  | -13.47109559 | 0.00000000 |
| C | -6.10808195  | -12.02739979 | 0.00000000 |
| C | -6.10808524  | 12.02740203  | 0.00000000 |
| C | -6.12482880  | 13.47109825  | 0.00000000 |
| C | -4.93074078  | -14.17553277 | 0.00000000 |
| C | -4.88371528  | -11.38872330 | 0.00000000 |
| C | -4.88371782  | 11.38872605  | 0.00000000 |
| C | -4.93074419  | 14.17553580  | 0.00000000 |
| C | -3.67625608  | -13.53299512 | 0.00000000 |
| C | -3.66198978  | -12.08683625 | 0.00000000 |
| C | -3.66199170  | 12.08683940  | 0.00000000 |
| C | -3.67625838  | 13.53299862  | 0.00000000 |
| C | -2.46247212  | -14.22277297 | 0.00000000 |
| C | -2.44166049  | -11.41754766 | 0.00000000 |
| C | -2.44166154  | 11.41755117  | 0.00000000 |
| C | -2.46247381  | 14.22277671  | 0.00000000 |
| C | -1.22661199  | -13.55568648 | 0.00000000 |
| C | -1.22139527  | -12.10320515 | 0.00000000 |

|   |              |              |            |
|---|--------------|--------------|------------|
| C | -1.22139554  | 12.10320886  | 0.00000000 |
| C | -1.22661251  | 13.55569054  | 0.00000000 |
| C | 0.00000660   | -14.23241217 | 0.00000000 |
| C | 0.00000383   | -11.42667738 | 0.00000000 |
| C | 0.00000447   | 11.42668130  | 0.00000000 |
| C | 0.00000696   | 14.23241631  | 0.00000000 |
| C | 1.22662374   | -13.55568393 | 0.00000000 |
| C | 1.22140422   | -12.10320273 | 0.00000000 |
| C | 1.22140563   | 12.10320667  | 0.00000000 |
| C | 1.22662512   | 13.55568823  | 0.00000000 |
| C | 2.46248500   | -14.22276783 | 0.00000000 |
| C | 2.44166789   | -11.41754294 | 0.00000000 |
| C | 2.44167017   | 11.41754689  | 0.00000000 |
| C | 2.46248743   | 14.22277204  | 0.00000000 |
| C | 3.67626717   | -13.53298749 | 0.00000000 |
| C | 3.66199813   | -12.08682901 | 0.00000000 |
| C | 3.66200115   | 12.08683281  | 0.00000000 |
| C | 3.67627035   | 13.53299164  | 0.00000000 |
| C | 4.93075264   | -14.17552242 | 0.00000000 |
| C | 4.88372176   | -11.38871387 | 0.00000000 |
| C | 4.88372545   | 11.38871744  | 0.00000000 |
| C | 4.93075686   | 14.17552631  | 0.00000000 |
| C | 6.12483472   | -13.47108306 | 0.00000000 |
| C | 6.10808888   | -12.02738792 | 0.00000000 |
| C | 6.10809321   | 12.02739109  | 0.00000000 |
| C | 6.12483951   | 13.47108666  | 0.00000000 |
| C | 7.38313644   | -14.14738130 | 0.00000000 |
| C | 7.36466471   | -11.30219871 | 0.00000000 |
| C | 7.42433430   | -9.92243482  | 0.00000000 |
| C | 7.42433881   | 9.92243694   | 0.00000000 |
| C | 7.36466945   | 11.30220115  | 0.00000000 |
| C | 7.38314202   | 14.14738458  | 0.00000000 |
| C | 8.56163951   | -13.46729004 | 0.00000000 |
| C | 8.60594132   | -12.03938349 | 0.00000000 |
| C | 8.64029326   | -9.21429207  | 0.00000000 |
| C | 8.67175212   | -7.82279987  | 0.00000000 |
| C | 8.67175604   | 7.82280059   | 0.00000000 |
| C | 8.64029772   | 9.21429320   | 0.00000000 |
| C | 8.60594666   | 12.03938569  | 0.00000000 |
| C | 8.56164525   | 13.46729271  | 0.00000000 |
| C | 9.81346953   | -11.35823251 | 0.00000000 |
| C | 9.88494336   | -9.95054257  | 0.00000000 |
| C | 9.87610531   | -7.10962996  | 0.00000000 |
| C | 9.90165285   | -5.71360943  | 0.00000000 |
| C | 9.90165599   | 5.71360866   | 0.00000000 |
| C | 9.87610908   | 7.10962960   | 0.00000000 |
| C | 9.88494840   | 9.95054326   | 0.00000000 |
| C | 9.81347491   | 11.35823375  | 0.00000000 |
| C | 11.08964902  | -9.24493516  | 0.00000000 |
| C | 11.13079857  | -7.84104573  | 0.00000000 |
| C | 11.09857016  | -4.99477865  | 0.00000000 |
| C | 11.11539778  | -3.59518182  | 0.00000000 |
| C | 11.11539997  | 3.59517969   | 0.00000000 |
| C | 11.09857308  | 4.99477685   | 0.00000000 |
| C | 11.13080299  | 7.84104484   | 0.00000000 |
| C | 11.08965399  | 9.24493478   | 0.00000000 |
| C | 12.33057431  | -7.11766456  | 0.00000000 |
| C | 12.35863589  | -5.71689707  | 0.00000000 |
| C | 12.30535765  | -2.87343705  | 0.00000000 |
| C | 12.31168648  | -1.46633850  | 0.00000000 |
| C | 12.31168748  | 1.46633526   | 0.00000000 |
| C | 12.30535950  | 2.87343399   | 0.00000000 |
| C | 12.35863945  | 5.71689462   | 0.00000000 |
| C | 12.33057856  | 7.11766252   | 0.00000000 |
| C | 13.55455328  | -4.98043788  | 0.00000000 |
| C | 13.56466894  | -3.58422346  | 0.00000000 |
| C | 13.47697602  | -0.72543812  | 0.00000000 |
| C | 13.47697653  | 0.72543408   | 0.00000000 |
| C | 13.56467141  | 3.58421966   | 0.00000000 |
| C | 13.55455657  | 4.98043432   | 0.00000000 |
| C | 14.74841073  | -2.81898717  | 0.00000000 |
| C | 14.73550163  | -1.43253868  | 0.00000000 |
| C | 14.73550275  | 1.43253380   | 0.00000000 |
| C | 14.74841279  | 2.81898239   | 0.00000000 |
| C | 15.95005158  | -0.68039392  | 0.00000000 |
| C | 15.95005212  | 0.68038810   | 0.00000000 |
| H | -16.89716124 | -1.23746664  | 0.00000000 |
| H | -16.89716225 | 1.23745932   | 0.00000000 |
| H | -15.71656592 | -3.34168775  | 0.00000000 |
| H | -15.71656838 | 3.34168163   | 0.00000000 |
| H | -14.51185387 | -5.52244828  | 0.00000000 |
| H | -14.51185748 | 5.52244351   | 0.00000000 |
| H | -13.28289360 | -7.66838649  | 0.00000000 |

|                  |              |              |            |
|------------------|--------------|--------------|------------|
| H                | -13.28289791 | 7.66838338   | 0.00000000 |
| H                | -12.03694320 | -9.80423888  | 0.00000000 |
| H                | -12.03694787 | 9.80423753   | 0.00000000 |
| H                | -11.33421768 | -0.96468163  | 0.00000000 |
| H                | -11.33421835 | 0.96467804   | 0.00000000 |
| H                | -10.74983991 | -11.93596827 | 0.00000000 |
| H                | -10.74984474 | 11.93596842  | 0.00000000 |
| H                | -10.15876670 | -3.05187433  | 0.00000000 |
| H                | -10.15876837 | 3.05187177   | 0.00000000 |
| H                | -9.51754113  | -14.00908672 | 0.00000000 |
| H                | -9.51754634  | 14.00908798  | 0.00000000 |
| H                | -8.94937319  | -5.16296721  | 0.00000000 |
| H                | -8.94937562  | 5.16296583   | 0.00000000 |
| H                | -7.72363967  | -7.26477731  | 0.00000000 |
| H                | -7.72364268  | 7.26477719   | 0.00000000 |
| H                | -7.37377284  | -15.24611457 | 0.00000000 |
| H                | -7.37377770  | 15.24611706  | 0.00000000 |
| H                | -6.50150172  | -9.32614918  | 0.00000000 |
| H                | -6.50150518  | 9.32615022   | 0.00000000 |
| H                | -4.96223307  | -15.27530841 | 0.00000000 |
| H                | -4.82940813  | -10.29139520 | 0.00000000 |
| H                | -4.82941035  | 10.29139781  | 0.00000000 |
| H                | -4.96223692  | 15.27531160  | 0.00000000 |
| H                | -2.47234342  | -15.32278349 | 0.00000000 |
| H                | -2.43319748  | -10.31745684 | 0.00000000 |
| H                | -2.43319835  | 10.31746015  | 0.00000000 |
| H                | -2.47234555  | 15.32278738  | 0.00000000 |
| H                | 0.00000767   | -15.33247139 | 0.00000000 |
| H                | 0.00000265   | -10.32667097 | 0.00000000 |
| H                | 0.00000340   | 10.32667470  | 0.00000000 |
| H                | 0.00000793   | 15.33247571  | 0.00000000 |
| H                | 2.47235849   | -15.32277818 | 0.00000000 |
| H                | 2.43320255   | -10.31745242 | 0.00000000 |
| H                | 2.43320484   | 10.31745619  | 0.00000000 |
| H                | 2.47236115   | 15.32278256  | 0.00000000 |
| H                | 4.96224703   | -15.27529771 | 0.00000000 |
| H                | 4.82941240   | -10.29138644 | 0.00000000 |
| H                | 4.82941595   | 10.29138990  | 0.00000000 |
| H                | 4.96225153   | 15.27530179  | 0.00000000 |
| H                | 6.50150390   | -9.32613878  | 0.00000000 |
| H                | 6.50150814   | 9.32614102   | 0.00000000 |
| H                | 7.37378462   | -15.24609936 | 0.00000000 |
| H                | 7.37379047   | 15.24610281  | 0.00000000 |
| H                | 7.72363863   | -7.26476817  | 0.00000000 |
| H                | 7.72364217   | 7.26476920   | 0.00000000 |
| H                | 8.94936851   | -5.16296027  | 0.00000000 |
| H                | 8.94937124   | 5.16295988   | 0.00000000 |
| H                | 9.51754951   | -14.00906822 | 0.00000000 |
| H                | 9.51755573   | 14.00907043  | 0.00000000 |
| H                | 10.15875850  | -3.05187006  | 0.00000000 |
| H                | 10.15876031  | 3.05186837   | 0.00000000 |
| H                | 10.74984259  | -11.93595037 | 0.00000000 |
| H                | 10.74984843  | 11.93595120  | 0.00000000 |
| H                | 11.33420628  | -0.96467961  | 0.00000000 |
| H                | 11.33420702  | 0.96467685   | 0.00000000 |
| H                | 12.03694094  | -9.80422280  | 0.00000000 |
| H                | 12.03694633  | 9.80422200   | 0.00000000 |
| H                | 13.28288659  | -7.66837323  | 0.00000000 |
| H                | 13.28289131  | 7.66837064   | 0.00000000 |
| H                | 14.51184267  | -5.52243843  | 0.00000000 |
| H                | 14.51184643  | 5.52243425   | 0.00000000 |
| H                | 15.71655099  | -3.34168149  | 0.00000000 |
| H                | 15.71655348  | 3.34167606   | 0.00000000 |
| H                | 16.89714401  | -1.23746499  | 0.00000000 |
| H                | 16.89714503  | 1.23745842   | 0.00000000 |
| 8-HGQR (triplet) |              |              |            |
| C                | -18.40344192 | -0.68044817  | 0.00000000 |
| C                | -18.40344352 | 0.68042353   | 0.00000000 |
| C                | -17.20262494 | -2.81810410  | 0.00000000 |
| C                | -17.18886885 | -1.43148513  | 0.00000000 |
| C                | -17.18887197 | 1.43146323   | 0.00000000 |
| C                | -17.20263074 | 2.81808312   | 0.00000000 |
| C                | -16.01245815 | -4.97998923  | 0.00000000 |
| C                | -16.02006848 | -3.58355002  | 0.00000000 |
| C                | -15.92984798 | -0.72525436  | 0.00000000 |
| C                | -15.92984938 | 0.72523455   | 0.00000000 |
| C                | -16.02007490 | 3.58353218   | 0.00000000 |
| C                | -16.01246653 | 4.97997315   | 0.00000000 |
| C                | -14.79492112 | -7.11881217  | 0.00000000 |
| C                | -14.81875805 | -5.71844106  | 0.00000000 |
| C                | -14.75965066 | -2.87467108  | 0.00000000 |
| C                | -14.76467219 | -1.46787853  | 0.00000000 |
| C                | -14.76467456 | 1.46786132   | 0.00000000 |

|   |              |              |            |
|---|--------------|--------------|------------|
| C | -14.75965493 | 2.87465483   | 0.00000000 |
| C | -14.81876628 | 5.71842869   | 0.00000000 |
| C | -14.79493067 | 7.11880222   | 0.00000000 |
| C | -13.56356889 | -9.24803059  | 0.00000000 |
| C | -13.59757369 | -7.84700663  | 0.00000000 |
| C | -13.55628765 | -4.99912927  | 0.00000000 |
| C | -13.57067651 | -3.59971858  | 0.00000000 |
| C | -13.57068093 | 3.59970546   | 0.00000000 |
| C | -13.55629344 | 4.99911800   | 0.00000000 |
| C | -13.59758253 | 7.84700049   | 0.00000000 |
| C | -13.56357848 | 9.24802713   | 0.00000000 |
| C | -12.31728718 | -11.36991842 | 0.00000000 |
| C | -12.36173015 | -9.96699786  | 0.00000000 |
| C | -12.33877907 | -7.11902679  | 0.00000000 |
| C | -12.36153075 | -5.72191675  | 0.00000000 |
| C | -12.36153618 | 5.72190898   | 0.00000000 |
| C | -12.33878543 | 7.11902137   | 0.00000000 |
| C | -12.36173880 | 9.96699785   | 0.00000000 |
| C | -12.31729624 | 11.36992087  | 0.00000000 |
| C | -11.03829721 | -13.47973949 | 0.00000000 |
| C | -11.11090426 | -12.07301568 | 0.00000000 |
| C | -11.10854751 | -9.23160512  | 0.00000000 |
| C | -11.13919221 | -7.83547092  | 0.00000000 |
| C | -11.13919793 | 7.83546900   | 0.00000000 |
| C | -11.10855390 | 9.23160555   | 0.00000000 |
| C | -11.11091245 | 12.07302092  | 0.00000000 |
| C | -11.03830555 | 13.47974670  | 0.00000000 |
| C | -9.78648859  | -15.58726343 | 0.00000000 |
| C | -9.83003820  | -14.15990844 | 0.00000000 |
| C | -9.86758319  | -11.33446220 | 0.00000000 |
| C | -9.90287339  | -9.94216584  | 0.00000000 |
| C | -9.90287913  | 9.94216941   | 0.00000000 |
| C | -9.86758952  | 11.33446779  | 0.00000000 |
| C | -9.83004567  | 14.15991767  | 0.00000000 |
| C | -9.78649652  | 15.58727387  | 0.00000000 |
| C | -8.60779848  | -16.26716389 | 0.00000000 |
| C | -8.58943904  | -13.42154425 | 0.00000000 |
| C | -8.65103167  | -12.04101470 | 0.00000000 |
| C | -8.65103752  | 12.04102290  | 0.00000000 |
| C | -8.58944499  | 13.42155382  | 0.00000000 |
| C | -8.60780580  | 16.26717533  | 0.00000000 |
| C | -7.35060636  | -15.59001393 | 0.00000000 |
| C | -7.33304322  | -14.14630958 | 0.00000000 |
| C | -7.33304816  | 14.14632064  | 0.00000000 |
| C | -7.35061222  | 15.59002584  | 0.00000000 |
| C | -6.15674691  | -16.29513044 | 0.00000000 |
| C | -6.10728402  | -13.50846390 | 0.00000000 |
| C | -6.10728783  | 13.50847579  | 0.00000000 |
| C | -6.15675207  | 16.29514266  | 0.00000000 |
| C | -4.90276579  | -15.65359288 | 0.00000000 |
| C | -4.88637920  | -14.20743225 | 0.00000000 |
| C | -4.88638220  | 14.20744489  | 0.00000000 |
| C | -4.90276935  | 15.65360584  | 0.00000000 |
| C | -3.69007024  | -16.34563521 | 0.00000000 |
| C | -3.66366707  | -13.54062228 | 0.00000000 |
| C | -3.66366924  | 13.54063559  | 0.00000000 |
| C | -3.69007340  | 16.34564829  | 0.00000000 |
| C | -2.45363330  | -15.68144370 | 0.00000000 |
| C | -2.44474452  | -14.22828282 | 0.00000000 |
| C | -2.44474598  | 14.22829645  | 0.00000000 |
| C | -2.45363511  | 15.68145737  | 0.00000000 |
| C | -1.22958532  | -16.36174314 | 0.00000000 |
| C | -1.22090668  | -13.55570497 | 0.00000000 |
| C | -1.22090754  | 13.55571900  | 0.00000000 |
| C | -1.22958652  | 16.36175665  | 0.00000000 |
| C | 0.00000704   | -15.68963175 | 0.00000000 |
| C | 0.00000577   | -14.23531585 | 0.00000000 |
| C | 0.00000554   | 14.23532980  | 0.00000000 |
| C | 0.00000681   | 15.68964562  | 0.00000000 |
| C | 1.22960054   | -16.36174089 | 0.00000000 |
| C | 1.22091697   | -13.55570283 | 0.00000000 |
| C | 1.22091736   | 13.55571687  | 0.00000000 |
| C | 1.22960128   | 16.36175438  | 0.00000000 |
| C | 2.45364711   | -15.68143922 | 0.00000000 |
| C | 2.44475582   | -14.22827850 | 0.00000000 |
| C | 2.44475682   | 14.22829211  | 0.00000000 |
| C | 2.45364848   | 15.68145285  | 0.00000000 |
| C | 3.69008492   | -16.34562845 | 0.00000000 |
| C | 3.66367691   | -13.54061592 | 0.00000000 |
| C | 3.66367856   | 13.54062920  | 0.00000000 |
| C | 3.69008770   | 16.34564143  | 0.00000000 |
| C | 4.90277881   | -15.65358397 | 0.00000000 |
| C | 4.88638979   | -14.20742370 | 0.00000000 |

|   |              |              |            |
|---|--------------|--------------|------------|
| C | 4.88639230   | 14.20743617  | 0.00000000 |
| C | 4.90278200   | 15.65359672  | 0.00000000 |
| C | 6.15676052   | -16.29511925 | 0.00000000 |
| C | 6.10729296   | -13.50845344 | 0.00000000 |
| C | 6.10729609   | 13.50846504  | 0.00000000 |
| C | 6.15676540   | 16.29513106  | 0.00000000 |
| C | 7.35061810   | -15.59000088 | 0.00000000 |
| C | 7.33305241   | -14.14629716 | 0.00000000 |
| C | 7.33305680   | 14.14630755  | 0.00000000 |
| C | 7.35062363   | 15.59001216  | 0.00000000 |
| C | 8.60781054   | -16.26714876 | 0.00000000 |
| C | 8.58944630   | -13.42153033 | 0.00000000 |
| C | 8.65103629   | -12.04100182 | 0.00000000 |
| C | 8.65104163   | 12.04100925  | 0.00000000 |
| C | 8.58945167   | 13.42153900  | 0.00000000 |
| C | 8.60781762   | 16.26715935  | 0.00000000 |
| C | 9.78649880   | -15.58724671 | 0.00000000 |
| C | 9.83004563   | -14.15989251 | 0.00000000 |
| C | 9.86758610   | -11.33444878 | 0.00000000 |
| C | 9.90287405   | -9.94215398  | 0.00000000 |
| C | 9.90287908   | 9.94215687   | 0.00000000 |
| C | 9.86759176   | 11.33445355  | 0.00000000 |
| C | 9.83005254   | 14.15990071  | 0.00000000 |
| C | 9.78650635   | 15.58725611  | 0.00000000 |
| C | 11.03830254  | -13.47972263 | 0.00000000 |
| C | 11.11090713  | -12.07300010 | 0.00000000 |
| C | 11.10854620  | -9.23159334  | 0.00000000 |
| C | 11.13918868  | -7.83546109  | 0.00000000 |
| C | 11.13919351  | 7.83545843   | 0.00000000 |
| C | 11.10855169  | 9.23159293   | 0.00000000 |
| C | 11.11091456  | 12.07300428  | 0.00000000 |
| C | 11.03831018  | 13.47972869  | 0.00000000 |
| C | 12.31728793  | -11.36990274 | 0.00000000 |
| C | 12.36172841  | -9.96698399  | 0.00000000 |
| C | 12.33877341  | -7.11901752  | 0.00000000 |
| C | 12.36152301  | -5.72190963  | 0.00000000 |
| C | 12.36152757  | 5.72190108   | 0.00000000 |
| C | 12.33877876  | 7.11901126   | 0.00000000 |
| C | 12.36173605  | 9.96698294   | 0.00000000 |
| C | 12.31729604  | 11.36990402  | 0.00000000 |
| C | 13.56356490  | -9.24801716  | 0.00000000 |
| C | 13.59756732  | -7.84699537  | 0.00000000 |
| C | 13.55627780  | -4.99912291  | 0.00000000 |
| C | 13.57066486  | -3.59971428  | 0.00000000 |
| C | 13.57066864  | 3.59970045   | 0.00000000 |
| C | 13.55628268  | 4.99911090   | 0.00000000 |
| C | 13.59757498  | 7.84698830   | 0.00000000 |
| C | 13.56357327  | 9.24801260   | 0.00000000 |
| C | 14.79491253  | -7.11880174  | 0.00000000 |
| C | 14.81874735  | -5.71843289  | 0.00000000 |
| C | 14.75963701  | -2.87466750  | 0.00000000 |
| C | 14.76465700  | -1.46787678  | 0.00000000 |
| C | 14.76465906  | 1.46785909   | 0.00000000 |
| C | 14.75964066  | 2.87465074   | 0.00000000 |
| C | 14.81875445  | 5.71841983   | 0.00000000 |
| C | 14.79492077  | 7.11879093   | 0.00000000 |
| C | 16.01244542  | -4.97998196  | 0.00000000 |
| C | 16.02005390  | -3.58354488  | 0.00000000 |
| C | 15.92983121  | -0.72525365  | 0.00000000 |
| C | 15.92983240  | 0.72523365   | 0.00000000 |
| C | 16.02005944  | 3.58352671   | 0.00000000 |
| C | 16.01245262  | 4.97996540   | 0.00000000 |
| C | 17.20260851  | -2.81809975  | 0.00000000 |
| C | 17.18885133  | -1.43148279  | 0.00000000 |
| C | 17.18885400  | 1.43146095   | 0.00000000 |
| C | 17.20261348  | 2.81807869   | 0.00000000 |
| C | 18.40342326  | -0.68044713  | 0.00000000 |
| C | 18.40342462  | 0.68042286   | 0.00000000 |
| H | -19.35028905 | -1.23791508  | 0.00000000 |
| H | -19.35029199 | 1.23788858   | 0.00000000 |
| H | -18.17118693 | -3.34001556  | 0.00000000 |
| H | -18.17119414 | 3.33999318   | 0.00000000 |
| H | -16.97091059 | -5.51994140  | 0.00000000 |
| H | -16.97092068 | 5.51992422   | 0.00000000 |
| H | -15.74896796 | -7.66652659  | 0.00000000 |
| H | -15.74897938 | 7.66651581   | 0.00000000 |
| H | -14.51391974 | -9.80213125  | 0.00000000 |
| H | -14.51393113 | 9.80212717   | 0.00000000 |
| H | -13.78697473 | -0.96654408  | 0.00000000 |
| H | -13.78697605 | 0.96652867   | 0.00000000 |
| H | -13.26319883 | -11.93154688 | 0.00000000 |
| H | -13.26320942 | 11.93154881  | 0.00000000 |
| H | -12.61303113 | -3.05815314  | 0.00000000 |

|                  |              |              |            |
|------------------|--------------|--------------|------------|
| H                | -12.61303408 | 3.05814125   | 0.00000000 |
| H                | -11.97406109 | -14.05843944 | 0.00000000 |
| H                | -11.97407076 | 14.05844605  | 0.00000000 |
| H                | -11.40763998 | -5.17403905  | 0.00000000 |
| H                | -11.40764385 | 5.17403204   | 0.00000000 |
| H                | -10.74253340 | -16.12877831 | 0.00000000 |
| H                | -10.74254248 | 16.12878787  | 0.00000000 |
| H                | -10.18874523 | -7.28163945  | 0.00000000 |
| H                | -10.18874949 | 7.28163791   | 0.00000000 |
| H                | -8.95596194  | -9.38206946  | 0.00000000 |
| H                | -8.95596653  | 9.38207310   | 0.00000000 |
| H                | -8.59773727  | -17.36586282 | 0.00000000 |
| H                | -8.59774502  | 17.36587456  | 0.00000000 |
| H                | -7.72852670  | -11.44413245 | 0.00000000 |
| H                | -7.72853205  | 11.44414030  | 0.00000000 |
| H                | -6.18900058  | -17.39488265 | 0.00000000 |
| H                | -6.05269912  | -12.41110455 | 0.00000000 |
| H                | -6.05270276  | 12.41111605  | 0.00000000 |
| H                | -6.18900642  | 17.39489502  | 0.00000000 |
| H                | -3.70228263  | -17.44562670 | 0.00000000 |
| H                | -3.65320268  | -12.44053442 | 0.00000000 |
| H                | -3.65320475  | 12.44054755  | 0.00000000 |
| H                | -3.70228658  | 17.44563975  | 0.00000000 |
| H                | -1.23315641  | -17.46180278 | 0.00000000 |
| H                | -1.21758489  | -12.45569579 | 0.00000000 |
| H                | -1.21758577  | 12.45570982  | 0.00000000 |
| H                | -1.23315787  | 17.46181617  | 0.00000000 |
| H                | 1.23317357   | -17.46180045 | 0.00000000 |
| H                | 1.21759313   | -12.45569375 | 0.00000000 |
| H                | 1.21759350   | 12.45570781  | 0.00000000 |
| H                | 1.23317454   | 17.46181384  | 0.00000000 |
| H                | 3.70229922   | -17.44561975 | 0.00000000 |
| H                | 3.65321050   | -12.44052836 | 0.00000000 |
| H                | 3.65321198   | 12.44054154  | 0.00000000 |
| H                | 3.70230284   | 17.44563269  | 0.00000000 |
| H                | 6.18901602   | -17.39487110 | 0.00000000 |
| H                | 6.05270635   | -12.41109462 | 0.00000000 |
| H                | 6.05270902   | 12.41110603  | 0.00000000 |
| H                | 6.18902168   | 17.39488308  | 0.00000000 |
| H                | 7.72853073   | -11.44412156 | 0.00000000 |
| H                | 7.72853572   | 11.44412877  | 0.00000000 |
| H                | 8.59775091   | -17.36584730 | 0.00000000 |
| H                | 8.59775862   | 17.36585821  | 0.00000000 |
| H                | 8.95596269   | -9.38205932  | 0.00000000 |
| H                | 8.95596659   | 9.38206253   | 0.00000000 |
| H                | 10.18874209  | -7.28163130  | 0.00000000 |
| H                | 10.18874555  | 7.28162914   | 0.00000000 |
| H                | 10.74254399  | -16.12875970 | 0.00000000 |
| H                | 10.74255272  | 16.12876812  | 0.00000000 |
| H                | 11.40763287  | -5.17403347  | 0.00000000 |
| H                | 11.40763602  | 5.17402563   | 0.00000000 |
| H                | 11.97406647  | -14.05842098 | 0.00000000 |
| H                | 11.97407542  | 14.05842634  | 0.00000000 |
| H                | 12.61302024  | -3.05815021  | 0.00000000 |
| H                | 12.61302274  | 3.05813740   | 0.00000000 |
| H                | 13.26319930  | -11.93152966 | 0.00000000 |
| H                | 13.26320886  | 11.93153030  | 0.00000000 |
| H                | 13.78696052  | -0.96654324  | 0.00000000 |
| H                | 13.78696169  | 0.96652704   | 0.00000000 |
| H                | 14.51391528  | -9.80211629  | 0.00000000 |
| H                | 14.51392529  | 9.80211097   | 0.00000000 |
| H                | 15.74895879  | -7.66651468  | 0.00000000 |
| H                | 15.74896869  | 7.66650297   | 0.00000000 |
| H                | 16.97089728  | -5.51993273  | 0.00000000 |
| H                | 16.97090599  | 5.51991509   | 0.00000000 |
| H                | 18.17116987  | -3.34001008  | 0.00000000 |
| H                | 18.17117610  | 3.33998772   | 0.00000000 |
| H                | 19.35026950  | -1.23791354  | 0.00000000 |
| H                | 19.35027206  | 1.23788763   | 0.00000000 |
| 9-HGQR (triplet) |              |              |            |
| C                | -20.85876726 | -0.68043739  | 0.00000000 |
| C                | -20.85876968 | 0.68042382   | 0.00000000 |
| C                | -19.65822576 | -2.81750239  | 0.00000000 |
| C                | -19.64399309 | -1.43050991  | 0.00000000 |
| C                | -19.64399847 | 1.43050067   | 0.00000000 |
| C                | -19.65823645 | 2.81749204   | 0.00000000 |
| C                | -18.47049095 | -4.97980757  | 0.00000000 |
| C                | -18.47656603 | -3.58263155  | 0.00000000 |
| C                | -18.38497025 | -0.72511151  | 0.00000000 |
| C                | -18.38497318 | 0.72510753   | 0.00000000 |
| C                | -18.47658063 | 3.58262482   | 0.00000000 |
| C                | -18.47051154 | 4.97979883   | 0.00000000 |
| C                | -17.25732763 | -7.12003066  | 0.00000000 |

|   |              |              |            |
|---|--------------|--------------|------------|
| C | -17.27869942 | -5.71887134  | 0.00000000 |
| C | -17.21573583 | -2.87535272  | 0.00000000 |
| C | -17.21961119 | -1.46902363  | 0.00000000 |
| C | -17.21961764 | 1.46902360   | 0.00000000 |
| C | -17.21574875 | 2.87535161   | 0.00000000 |
| C | -17.27872447 | 5.71886545   | 0.00000000 |
| C | -17.25735897 | 7.12002208   | 0.00000000 |
| C | -16.03244561 | -9.25120108  | 0.00000000 |
| C | -16.06254616 | -7.85037635  | 0.00000000 |
| C | -16.01504626 | -5.00196001  | 0.00000000 |
| C | -16.02714680 | -3.60333668  | 0.00000000 |
| C | -16.02716404 | 3.60333882   | 0.00000000 |
| C | -16.01507017 | 5.00196003   | 0.00000000 |
| C | -16.06258239 | 7.85037012   | 0.00000000 |
| C | -16.03248827 | 9.25119201   | 0.00000000 |
| C | -14.79521870 | -11.37507585 | 0.00000000 |
| C | -14.83295601 | -9.97524561  | 0.00000000 |
| C | -14.80130434 | -7.12531571  | 0.00000000 |
| C | -14.82128985 | -5.72875568  | 0.00000000 |
| C | -14.82131847 | 5.72875810   | 0.00000000 |
| C | -14.80133969 | 7.12531539   | 0.00000000 |
| C | -14.83300354 | 9.97523908   | 0.00000000 |
| C | -14.79527250 | 11.37506715  | 0.00000000 |
| C | -13.54474853 | -13.49326585 | 0.00000000 |
| C | -13.59116400 | -12.09173389 | 0.00000000 |
| C | -13.57581579 | -9.24307759  | 0.00000000 |
| C | -13.60392313 | -7.84583605  | 0.00000000 |
| C | -13.60396314 | 7.84583778   | 0.00000000 |
| C | -13.57586227 | 9.24307668   | 0.00000000 |
| C | -13.59122210 | 12.09172851  | 0.00000000 |
| C | -13.54481232 | 13.49325968  | 0.00000000 |
| C | -12.26354461 | -15.60067530 | 0.00000000 |
| C | -12.33671740 | -14.19492826 | 0.00000000 |
| C | -12.33976503 | -11.35360872 | 0.00000000 |
| C | -12.37499311 | -9.95633474  | 0.00000000 |
| C | -12.37504362 | 9.95633612   | 0.00000000 |
| C | -12.33982146 | 11.35360836  | 0.00000000 |
| C | -12.33678447 | 14.19492660  | 0.00000000 |
| C | -12.26361675 | 15.60067464  | 0.00000000 |
| C | -11.01167223 | -17.70728862 | 0.00000000 |
| C | -11.05454755 | -16.28025841 | 0.00000000 |
| C | -11.09482207 | -13.45480281 | 0.00000000 |
| C | -11.13335550 | -12.06136839 | 0.00000000 |
| C | -11.13341485 | 12.06137114  | 0.00000000 |
| C | -11.09488651 | 13.45480534  | 0.00000000 |
| C | -11.05462142 | 16.28026347  | 0.00000000 |
| C | -11.01174978 | 17.70729613  | 0.00000000 |
| C | -9.83285964  | -18.38691641 | 0.00000000 |
| C | -9.81486045  | -15.54113114 | 0.00000000 |
| C | -9.87788056  | -14.15979877 | 0.00000000 |
| C | -9.87794647  | 14.15980569  | 0.00000000 |
| C | -9.81493037  | 15.54113982  | 0.00000000 |
| C | -9.83293714  | 18.38692964  | 0.00000000 |
| C | -8.57658159  | -17.70879801 | 0.00000000 |
| C | -8.55852676  | -16.26549408 | 0.00000000 |
| C | -8.55859631  | 16.26550756  | 0.00000000 |
| C | -8.57665346  | 17.70881487  | 0.00000000 |
| C | -7.38255600  | -18.41432931 | 0.00000000 |
| C | -7.33163082  | -15.62795543 | 0.00000000 |
| C | -7.33169426  | 15.62797064  | 0.00000000 |
| C | -7.38262421  | 18.41435108  | 0.00000000 |
| C | -6.12941392  | -17.77323058 | 0.00000000 |
| C | -6.11157898  | -16.32751523 | 0.00000000 |
| C | -6.11163766  | 16.32753272  | 0.00000000 |
| C | -6.12947477  | 17.77325337  | 0.00000000 |
| C | -4.91684497  | -18.46689786 | 0.00000000 |
| C | -4.88653486  | -15.66242743 | 0.00000000 |
| C | -4.88658540  | 15.66244456  | 0.00000000 |
| C | -4.91689880  | 18.46692424  | 0.00000000 |
| C | -3.68090162  | -17.80458826 | 0.00000000 |
| C | -3.66937598  | -16.35160577 | 0.00000000 |
| C | -3.66941865  | 16.35162529  | 0.00000000 |
| C | -3.68094556  | 17.80461471  | 0.00000000 |
| C | -2.45747459  | -18.48745236 | 0.00000000 |
| C | -2.44252309  | -15.68192762 | 0.00000000 |
| C | -2.44255556  | 15.68194608  | 0.00000000 |
| C | -2.45750879  | 18.48748204  | 0.00000000 |
| C | -1.22732062  | -17.81867056 | 0.00000000 |
| C | -1.22346623  | -16.36369632 | 0.00000000 |
| C | -1.22348832  | 16.36371696  | 0.00000000 |
| C | -1.22734316  | 17.81869919  | 0.00000000 |
| C | -0.00000949  | -18.49423459 | 0.00000000 |
| C | -0.00000534  | -15.68819291 | 0.00000000 |

|   |             |              |            |
|---|-------------|--------------|------------|
| C | -0.00001625 | 15.68821177  | 0.00000000 |
| C | -0.00002044 | 18.49426559  | 0.00000000 |
| C | 1.22730375  | -17.81867437 | 0.00000000 |
| C | 1.22345361  | -16.36369995 | 0.00000000 |
| C | 1.22345392  | 16.36372059  | 0.00000000 |
| C | 1.22730452  | 17.81870306  | 0.00000000 |
| C | 2.45745597  | -18.48746003 | 0.00000000 |
| C | 2.44251284  | -15.68193475 | 0.00000000 |
| C | 2.44252362  | 15.68195314  | 0.00000000 |
| C | 2.45746856  | 18.48748983  | 0.00000000 |
| C | 3.68088547  | -17.80459968 | 0.00000000 |
| C | 3.66936413  | -16.35161672 | 0.00000000 |
| C | 3.66938541  | 16.35163614  | 0.00000000 |
| C | 3.68090812  | 17.80462623  | 0.00000000 |
| C | 4.91682728  | -18.46691333 | 0.00000000 |
| C | 4.88652569  | -15.66244181 | 0.00000000 |
| C | 4.88655516  | 15.66245866  | 0.00000000 |
| C | 4.91686027  | 18.46693980  | 0.00000000 |
| C | 6.12939915  | -17.77324985 | 0.00000000 |
| C | 6.11156850  | -16.32753367 | 0.00000000 |
| C | 6.11160670  | 16.32755082  | 0.00000000 |
| C | 6.12943961  | 17.77327264  | 0.00000000 |
| C | 7.38253983  | -18.41435305 | 0.00000000 |
| C | 7.33162329  | -15.62797734 | 0.00000000 |
| C | 7.33166689  | 15.62799190  | 0.00000000 |
| C | 7.38258836  | 18.41437474  | 0.00000000 |
| C | 8.57656852  | -17.70882511 | 0.00000000 |
| C | 8.55851826  | -16.26552026 | 0.00000000 |
| C | 8.55856910  | 16.26553276  | 0.00000000 |
| C | 8.57662141  | 17.70884171  | 0.00000000 |
| C | 9.83284585  | -18.38694687 | 0.00000000 |
| C | 9.81485441  | -15.54116056 | 0.00000000 |
| C | 9.87787805  | -14.15982671 | 0.00000000 |
| C | 9.87792790  | 14.15983057  | 0.00000000 |
| C | 9.81490696  | 15.54116761  | 0.00000000 |
| C | 9.83290506  | 18.38696026  | 0.00000000 |
| C | 11.01166136 | -17.70732179 | 0.00000000 |
| C | 11.05454105 | -16.28029062 | 0.00000000 |
| C | 11.09482196 | -13.45483238 | 0.00000000 |
| C | 11.13335837 | -12.06139599 | 0.00000000 |
| C | 11.13340422 | 12.06139225  | 0.00000000 |
| C | 11.09487165 | 13.45483053  | 0.00000000 |
| C | 11.05459846 | 16.28029483  | 0.00000000 |
| C | 11.01172156 | 17.70732942  | 0.00000000 |
| C | 12.26354130 | -15.60070963 | 0.00000000 |
| C | 12.33671715 | -14.19496132 | 0.00000000 |
| C | 12.33977078 | -11.35363769 | 0.00000000 |
| C | 12.37500190 | -9.95636132  | 0.00000000 |
| C | 12.37504204 | 9.95635151   | 0.00000000 |
| C | 12.33981541 | 11.35362879  | 0.00000000 |
| C | 12.33677051 | 14.19495631  | 0.00000000 |
| C | 12.26359837 | 15.60070742  | 0.00000000 |
| C | 13.54475148 | -13.49330006 | 0.00000000 |
| C | 13.59117012 | -12.09176634 | 0.00000000 |
| C | 13.57582782 | -9.24310500  | 0.00000000 |
| C | 13.60393793 | -7.84586080  | 0.00000000 |
| C | 13.60397099 | 7.84584580   | 0.00000000 |
| C | 13.57586583 | 9.24309034   | 0.00000000 |
| C | 13.59121778 | 12.09175359  | 0.00000000 |
| C | 13.54480321 | 13.49328909  | 0.00000000 |
| C | 14.79522833 | -11.37510913 | 0.00000000 |
| C | 14.83296886 | -9.97527651  | 0.00000000 |
| C | 14.80132259 | -7.12534080  | 0.00000000 |
| C | 14.82131061 | -5.72877805  | 0.00000000 |
| C | 14.82133544 | 5.72875834   | 0.00000000 |
| C | 14.80135282 | 7.12532114   | 0.00000000 |
| C | 14.83300956 | 9.97525734   | 0.00000000 |
| C | 14.79527367 | 11.37509086  | 0.00000000 |
| C | 16.03246205 | -9.25123233  | 0.00000000 |
| C | 16.06256556 | -7.85040476  | 0.00000000 |
| C | 16.01507046 | -5.00198231  | 0.00000000 |
| C | 16.02717322 | -3.60335639  | 0.00000000 |
| C | 16.02718906 | 3.60333210   | 0.00000000 |
| C | 16.01509207 | 5.00195798   | 0.00000000 |
| C | 16.06259833 | 7.85038013   | 0.00000000 |
| C | 16.03249990 | 9.25120791   | 0.00000000 |
| C | 17.25735040 | -7.12005907  | 0.00000000 |
| C | 17.27872492 | -5.71889672  | 0.00000000 |
| C | 17.21576579 | -2.87537226  | 0.00000000 |
| C | 17.21964349 | -1.46904065  | 0.00000000 |
| C | 17.21964984 | 1.46901154   | 0.00000000 |
| C | 17.21577824 | 2.87534315   | 0.00000000 |
| C | 17.27874911 | 5.71886713   | 0.00000000 |

|   |              |              |            |
|---|--------------|--------------|------------|
| C | 17.25738004  | 7.12002932   | 0.00000000 |
| C | 18.47051961  | -4.97983298  | 0.00000000 |
| C | 18.47659751  | -3.58265387  | 0.00000000 |
| C | 18.38500577  | -0.72512740  | 0.00000000 |
| C | 18.38500885  | 0.72509359   | 0.00000000 |
| C | 18.47661272  | 3.58261942   | 0.00000000 |
| C | 18.47054053  | 4.97979824   | 0.00000000 |
| C | 19.65826052  | -2.81752484  | 0.00000000 |
| C | 19.64402947  | -1.43052914  | 0.00000000 |
| C | 19.64403565  | 1.43048986   | 0.00000000 |
| C | 19.65827237  | 2.81748532   | 0.00000000 |
| C | 20.85880547  | -0.68045439  | 0.00000000 |
| C | 20.85880834  | 0.68040989   | 0.00000000 |
| H | -21.80536026 | -1.23830684  | 0.00000000 |
| H | -21.80536470 | 1.23828933   | 0.00000000 |
| H | -20.62702882 | -3.33895781  | 0.00000000 |
| H | -20.62704116 | 3.33894295   | 0.00000000 |
| H | -19.42975951 | -5.51831573  | 0.00000000 |
| H | -19.42978142 | 5.51830226   | 0.00000000 |
| H | -18.21265146 | -7.66553681  | 0.00000000 |
| H | -18.21268375 | 7.66552358   | 0.00000000 |
| H | -16.98452074 | -9.80236459  | 0.00000000 |
| H | -16.98456421 | 9.80235115   | 0.00000000 |
| H | -16.24179473 | -0.96787605  | 0.00000000 |
| H | -16.24179967 | 0.96787941   | 0.00000000 |
| H | -15.74405252 | -11.93179096 | 0.00000000 |
| H | -15.74410731 | 11.93177837  | 0.00000000 |
| H | -15.06875255 | -3.06307642  | 0.00000000 |
| H | -15.06876853 | 3.06308244   | 0.00000000 |
| H | -14.48961495 | -14.05665716 | 0.00000000 |
| H | -14.48968020 | 14.05664771  | 0.00000000 |
| H | -13.86623969 | -5.18286640  | 0.00000000 |
| H | -13.86626722 | 5.18287297   | 0.00000000 |
| H | -13.19887640 | -16.18006393 | 0.00000000 |
| H | -13.19895071 | 16.18006055  | 0.00000000 |
| H | -12.65188349 | -7.29472458  | 0.00000000 |
| H | -12.65192223 | 7.29473059   | 0.00000000 |
| H | -11.96783794 | -18.24855826 | 0.00000000 |
| H | -11.96791793 | 18.24856383  | 0.00000000 |
| H | -11.42593307 | -9.40009470  | 0.00000000 |
| H | -11.42598173 | 9.40010024   | 0.00000000 |
| H | -10.18740180 | -11.49963465 | 0.00000000 |
| H | -10.18745840 | 11.49964111  | 0.00000000 |
| H | -9.82204789  | -19.48559197 | 0.00000000 |
| H | -9.82212851  | 19.48560753  | 0.00000000 |
| H | -8.95564023  | -13.56246697 | 0.00000000 |
| H | -8.95570224  | 13.56247673  | 0.00000000 |
| H | -7.41515598  | -19.51406622 | 0.00000000 |
| H | -7.27698781  | -14.53057671 | 0.00000000 |
| H | -7.27704759  | 14.53058952  | 0.00000000 |
| H | -7.41522544  | -19.51409134 | 0.00000000 |
| H | -4.93065462  | -19.56687222 | 0.00000000 |
| H | -4.87463283  | -14.56234366 | 0.00000000 |
| H | -4.87468122  | 14.56235659  | 0.00000000 |
| H | -4.93070895  | 19.56690324  | 0.00000000 |
| H | -2.46363509  | -19.58750892 | 0.00000000 |
| H | -2.43685966  | -14.58191146 | 0.00000000 |
| H | -2.43689099  | 14.58192456  | 0.00000000 |
| H | -2.46366961  | 19.58754429  | 0.00000000 |
| H | -0.00001111  | -19.59431166 | 0.00000000 |
| H | -0.00000353  | -14.58816927 | 0.00000000 |
| H | -0.00001439  | 14.58818229  | 0.00000000 |
| H | -0.00002212  | 19.59434879  | 0.00000000 |
| H | 2.46361341   | -19.58751683 | 0.00000000 |
| H | 2.43685324   | -14.58191821 | 0.00000000 |
| H | 2.43686277   | 14.58193112  | 0.00000000 |
| H | 2.46362626   | 19.58755242  | 0.00000000 |
| H | 4.93063369   | -19.56688816 | 0.00000000 |
| H | 4.87462758   | -14.56235729 | 0.00000000 |
| H | 4.87465470   | 14.56236964  | 0.00000000 |
| H | 4.93066721   | 19.56691947  | 0.00000000 |
| H | 7.41513672   | -19.51409064 | 0.00000000 |
| H | 7.27698443   | -14.53059734 | 0.00000000 |
| H | 7.27702362   | 14.53060908  | 0.00000000 |
| H | 7.41518649   | 19.51411598  | 0.00000000 |
| H | 8.95563850   | -13.56249121 | 0.00000000 |
| H | 8.95568431   | 13.56249709  | 0.00000000 |
| H | 9.82203206   | -19.48562315 | 0.00000000 |
| H | 9.82209396   | 19.48563927  | 0.00000000 |
| H | 10.18740470  | -11.49965868 | 0.00000000 |
| H | 10.18744709  | 11.49965803  | 0.00000000 |
| H | 11.42594137  | -9.40011770  | 0.00000000 |
| H | 11.42597872  | 9.40011144   | 0.00000000 |

|   |             |              |            |
|---|-------------|--------------|------------|
| H | 11.96782642 | -18.24859464 | 0.00000000 |
| H | 11.96788944 | 18.24860087  | 0.00000000 |
| H | 12.65189718 | -7.29474617  | 0.00000000 |
| H | 12.65192802 | 7.29473480   | 0.00000000 |
| H | 13.19887319 | -16.18010055 | 0.00000000 |
| H | 13.19893297 | 16.18009637  | 0.00000000 |
| H | 13.86625882 | -5.18288615  | 0.00000000 |
| H | 13.86628180 | 5.18287001   | 0.00000000 |
| H | 14.48961873 | -14.05669337 | 0.00000000 |
| H | 14.48967263 | 14.05668010  | 0.00000000 |
| H | 15.06877715 | -3.06309375  | 0.00000000 |
| H | 15.06879121 | 3.06307300   | 0.00000000 |
| H | 15.74406318 | -11.93182666 | 0.00000000 |
| H | 15.74411054 | 11.93180540  | 0.00000000 |
| H | 16.24182476 | -0.96789122  | 0.00000000 |
| H | 16.24182953 | 0.96786540   | 0.00000000 |
| H | 16.98453832 | -9.80239858  | 0.00000000 |
| H | 16.98457820 | 9.80237048   | 0.00000000 |
| H | 18.21267532 | -7.66556818  | 0.00000000 |
| H | 18.21270712 | 7.66553416   | 0.00000000 |
| H | 19.42978902 | -5.51834437  | 0.00000000 |
| H | 19.42981228 | 5.51830498   | 0.00000000 |
| H | 20.62706472 | -3.33898264  | 0.00000000 |
| H | 20.62707889 | 3.33893851   | 0.00000000 |
| H | 21.80540065 | -1.23832430  | 0.00000000 |
| H | 21.80540608 | 1.23827533   | 0.00000000 |

## 10-HGQR (triplet)

|   |              |              |            |
|---|--------------|--------------|------------|
| C | -23.31581926 | -0.68034954  | 0.00000000 |
| C | -23.31581908 | 0.68034154   | 0.00000000 |
| C | -22.11553066 | -2.81698568  | 0.00000000 |
| C | -22.10079064 | -1.42989202  | 0.00000000 |
| C | -22.10079024 | 1.42988370   | 0.00000000 |
| C | -22.11552988 | 2.81697743   | 0.00000000 |
| C | -20.92962948 | -4.97966692  | 0.00000000 |
| C | -20.93441148 | -3.58202012  | 0.00000000 |
| C | -20.84171917 | -0.72517251  | 0.00000000 |
| C | -20.84171896 | 0.72516377   | 0.00000000 |
| C | -20.93441045 | 3.58201164   | 0.00000000 |
| C | -20.92962810 | 4.97965860   | 0.00000000 |
| C | -19.71962703 | -7.12111801  | 0.00000000 |
| C | -19.73919275 | -5.71908244  | 0.00000000 |
| C | -19.67333904 | -2.87603784  | 0.00000000 |
| C | -19.67636256 | -1.46984223  | 0.00000000 |
| C | -19.67636208 | 1.46983322   | 0.00000000 |
| C | -19.67333811 | 2.87602895   | 0.00000000 |
| C | -19.73919114 | 5.71907408   | 0.00000000 |
| C | -19.71962513 | 7.12110992   | 0.00000000 |
| C | -18.49927018 | -9.25407549  | 0.00000000 |
| C | -18.52694825 | -7.85236477  | 0.00000000 |
| C | -18.47490911 | -5.00417107  | 0.00000000 |
| C | -18.48509354 | -3.60611506  | 0.00000000 |
| C | -18.48509223 | 3.60610603   | 0.00000000 |
| C | -18.47490744 | 5.00416235   | 0.00000000 |
| C | -18.52694613 | 7.85235688   | 0.00000000 |
| C | -18.49926786 | 9.25406800   | 0.00000000 |
| C | -17.26827141 | -11.38003149 | 0.00000000 |
| C | -17.30238234 | -9.98038115  | 0.00000000 |
| C | -17.26440552 | -7.12986141  | 0.00000000 |
| C | -17.28173505 | -5.73421409  | 0.00000000 |
| C | -17.28173295 | 5.73420546   | 0.00000000 |
| C | -17.26440317 | 7.12985325   | 0.00000000 |
| C | -17.30237977 | 9.98037409   | 0.00000000 |
| C | -17.26826875 | 11.38002492  | 0.00000000 |
| C | -16.02620121 | -13.50012137 | 0.00000000 |
| C | -16.06641523 | -12.10170803 | 0.00000000 |
| C | -16.04280979 | -9.25104293  | 0.00000000 |
| C | -16.06809545 | -7.85444465  | 0.00000000 |
| C | -16.06809265 | 7.85443682   | 0.00000000 |
| C | -16.04280683 | 9.25103568   | 0.00000000 |
| C | -16.06641233 | 12.10170207  | 0.00000000 |
| C | -16.02619832 | 13.50011593  | 0.00000000 |
| C | -14.77221476 | -15.61552877 | 0.00000000 |
| C | -14.82015655 | -14.21503695 | 0.00000000 |
| C | -14.81121901 | -11.36648215 | 0.00000000 |
| C | -14.84416067 | -9.96813797  | 0.00000000 |
| C | -14.84415730 | 9.96813129   | 0.00000000 |
| C | -14.81121561 | 11.36647610  | 0.00000000 |
| C | -14.82015341 | 14.21503217  | 0.00000000 |
| C | -14.77221176 | 15.61552448  | 0.00000000 |
| C | -13.48905881 | -17.72097433 | 0.00000000 |
| C | -13.56286050 | -16.31578785 | 0.00000000 |
| C | -13.57050061 | -13.47481260 | 0.00000000 |
| C | -13.60950507 | -12.07641968 | 0.00000000 |

|   |              |              |            |
|---|--------------|--------------|------------|
| C | -13.60950134 | 12.07641432  | 0.00000000 |
| C | -13.57049695 | 13.47480783  | 0.00000000 |
| C | -13.56285730 | 16.31578423  | 0.00000000 |
| C | -13.48905589 | 17.72097115  | 0.00000000 |
| C | -12.23692010 | -19.82673530 | 0.00000000 |
| C | -12.27951947 | -18.39976788 | 0.00000000 |
| C | -12.32224210 | -15.57434322 | 0.00000000 |
| C | -12.36332542 | -14.18015767 | 0.00000000 |
| C | -12.36332154 | 14.18015361  | 0.00000000 |
| C | -12.32223840 | 15.57433968  | 0.00000000 |
| C | -12.27951634 | 18.39976528  | 0.00000000 |
| C | -12.23691718 | 19.82673306  | 0.00000000 |
| C | -11.05809702 | -20.50596733 | 0.00000000 |
| C | -11.04061658 | -17.65986734 | 0.00000000 |
| C | -11.10474782 | -16.27815960 | 0.00000000 |
| C | -11.10474399 | 16.27815675  | 0.00000000 |
| C | -11.04061288 | 17.65986493  | 0.00000000 |
| C | -11.05809395 | 20.50596562  | 0.00000000 |
| C | -9.80235788  | -19.82699859 | 0.00000000 |
| C | -9.78397890  | -18.38397646 | 0.00000000 |
| C | -9.78397502  | 18.38397459  | 0.00000000 |
| C | -9.80235425  | 19.82699715  | 0.00000000 |
| C | -8.60838001  | -20.53278384 | 0.00000000 |
| C | -8.55652263  | -17.74658416 | 0.00000000 |
| C | -8.55651809  | 17.74658258  | 0.00000000 |
| C | -8.60837607  | 20.53278296  | 0.00000000 |
| C | -7.35573132  | -19.89186925 | 0.00000000 |
| C | -7.33685509  | -18.44658902 | 0.00000000 |
| C | -7.33685016  | 18.44658774  | 0.00000000 |
| C | -7.35572671  | 19.89186847  | 0.00000000 |
| C | -6.14335592  | -20.58676624 | 0.00000000 |
| C | -6.11020872  | -17.78271137 | 0.00000000 |
| C | -6.11020313  | 17.78271024  | 0.00000000 |
| C | -6.14335081  | 20.58676592  | 0.00000000 |
| C | -4.90787433  | -19.92567410 | 0.00000000 |
| C | -4.89439880  | -18.47314192 | 0.00000000 |
| C | -4.89439267  | 18.47314107  | 0.00000000 |
| C | -4.90786840  | 19.92567380  | 0.00000000 |
| C | -3.68461489  | -20.61052043 | 0.00000000 |
| C | -3.66500037  | -17.80556303 | 0.00000000 |
| C | -3.66499356  | 17.80556226  | 0.00000000 |
| C | -3.68460834  | 20.61052050  | 0.00000000 |
| C | -2.45476666  | -19.94398264 | 0.00000000 |
| C | -2.44801710  | -18.48915569 | 0.00000000 |
| C | -2.44800964  | 18.48915512  | 0.00000000 |
| C | -2.45475927  | 19.94398262  | 0.00000000 |
| C | -1.22799890  | -20.62218841 | 0.00000000 |
| C | -1.22147916  | -17.81670199 | 0.00000000 |
| C | -1.22147107  | 17.81670140  | 0.00000000 |
| C | -1.22799085  | 20.62218860  | 0.00000000 |
| C | -0.00000484  | -19.95010435 | 0.00000000 |
| C | -0.00000530  | -18.49443143 | 0.00000000 |
| C | 0.00000340   | 18.49443098  | 0.00000000 |
| C | 0.00000389   | 19.95010436  | 0.00000000 |
| C | 1.22798977   | -20.62218783 | 0.00000000 |
| C | 1.22146826   | -17.81670117 | 0.00000000 |
| C | 1.22147750   | 17.81670064  | 0.00000000 |
| C | 1.22799909   | 20.62218788  | 0.00000000 |
| C | 2.45475755   | -19.94398137 | 0.00000000 |
| C | 2.44800707   | -18.48915408 | 0.00000000 |
| C | 2.44801673   | 18.48915363  | 0.00000000 |
| C | 2.45476729   | 19.94398124  | 0.00000000 |
| C | 3.68460690   | -20.61051858 | 0.00000000 |
| C | 3.66499053   | -17.80556055 | 0.00000000 |
| C | 3.66500056   | 17.80556002  | 0.00000000 |
| C | 3.68461702   | 20.61051839  | 0.00000000 |
| C | 4.90786672   | -19.92567141 | 0.00000000 |
| C | 4.89439023   | -18.47313866 | 0.00000000 |
| C | 4.89440046   | 18.47313819  | 0.00000000 |
| C | 4.90787699   | 19.92567109  | 0.00000000 |
| C | 6.14334963   | -20.58676301 | 0.00000000 |
| C | 6.11020058   | -17.78270723 | 0.00000000 |
| C | 6.11021097   | 17.78270671  | 0.00000000 |
| C | 6.14336005   | 20.58676257  | 0.00000000 |
| C | 7.35572554   | -19.89186517 | 0.00000000 |
| C | 7.33684832   | -18.44658421 | 0.00000000 |
| C | 7.33685870   | 18.44658372  | 0.00000000 |
| C | 7.35573590   | 19.89186466  | 0.00000000 |
| C | 8.60837534   | -20.53277940 | 0.00000000 |
| C | 8.55651634   | -17.74657852 | 0.00000000 |
| C | 8.55652665   | 17.74657805  | 0.00000000 |
| C | 8.60838566   | 20.53277872  | 0.00000000 |
| C | 9.80235358   | -19.82699320 | 0.00000000 |

|   |              |              |            |
|---|--------------|--------------|------------|
| C | 9.78397394   | -18.38397030 | 0.00000000 |
| C | 9.78398403   | 18.38396980  | 0.00000000 |
| C | 9.80236369   | 19.82699252  | 0.00000000 |
| C | 11.05809389  | -20.50596115 | 0.00000000 |
| C | 11.04061179  | -17.65986021 | 0.00000000 |
| C | 11.10474268  | -16.27815137 | 0.00000000 |
| C | 11.10475239  | 16.27815162  | 0.00000000 |
| C | 11.04062163  | 17.65985989  | 0.00000000 |
| C | 11.05810375  | 20.50596037  | 0.00000000 |
| C | 12.23691715  | -19.82672813 | 0.00000000 |
| C | 12.27951596  | -18.39976001 | 0.00000000 |
| C | 12.32223713  | -15.57433374 | 0.00000000 |
| C | 12.36331991  | -14.18014701 | 0.00000000 |
| C | 12.36332920  | 14.18014890  | 0.00000000 |
| C | 12.32224653  | 15.57433468  | 0.00000000 |
| C | 12.27952534  | 18.39975966  | 0.00000000 |
| C | 12.23692669  | 19.82672742  | 0.00000000 |
| C | 13.48905576  | -17.72096549 | 0.00000000 |
| C | 13.56285665  | -16.31577816 | 0.00000000 |
| C | 13.57049555  | -13.47480088 | 0.00000000 |
| C | 13.60949967  | -12.07640676 | 0.00000000 |
| C | 13.60950804  | 12.07641085  | 0.00000000 |
| C | 13.57050423  | 13.47480370  | 0.00000000 |
| C | 13.56286541  | 16.31577890  | 0.00000000 |
| C | 13.48906459  | 17.72096551  | 0.00000000 |
| C | 14.77221135  | -15.61551793 | 0.00000000 |
| C | 14.82015262  | -14.21502514 | 0.00000000 |
| C | 14.81121429  | -11.36646838 | 0.00000000 |
| C | 14.84415562  | -9.96812317  | 0.00000000 |
| C | 14.84416264  | 9.96812993   | 0.00000000 |
| C | 14.81122176  | 11.36647365  | 0.00000000 |
| C | 14.82016043  | 14.21502765  | 0.00000000 |
| C | 14.77221943  | 15.61551940  | 0.00000000 |
| C | 16.02619779  | -13.50010859 | 0.00000000 |
| C | 16.06641149  | -12.10169430 | 0.00000000 |
| C | 16.04280547  | -9.25102773  | 0.00000000 |
| C | 16.06809083  | -7.85442885  | 0.00000000 |
| C | 16.06809615  | 7.85443824   | 0.00000000 |
| C | 16.04281139  | 9.25103563   | 0.00000000 |
| C | 16.06641796  | 12.10169911  | 0.00000000 |
| C | 16.02620472  | 13.50011207  | 0.00000000 |
| C | 17.26826809  | -11.38001702 | 0.00000000 |
| C | 17.30237868  | -9.98036608  | 0.00000000 |
| C | 17.26440150  | -7.12984574  | 0.00000000 |
| C | 17.28173075  | -5.73419838  | 0.00000000 |
| C | 17.28173428  | 5.73420990   | 0.00000000 |
| C | 17.26440571  | 7.12985606   | 0.00000000 |
| C | 17.30238362  | 9.98037342   | 0.00000000 |
| C | 17.26827357  | 11.38002293  | 0.00000000 |
| C | 18.49926677  | -9.25406012  | 0.00000000 |
| C | 18.52694445  | -7.85234931  | 0.00000000 |
| C | 18.47490524  | -5.00415592  | 0.00000000 |
| C | 18.48508952  | -3.60610035  | 0.00000000 |
| C | 18.48509142  | 3.60611322   | 0.00000000 |
| C | 18.47490780  | 5.00416800   | 0.00000000 |
| C | 18.52694789  | 7.85235899   | 0.00000000 |
| C | 18.49927075  | 9.25406850   | 0.00000000 |
| C | 19.71962329  | -7.12110282  | 0.00000000 |
| C | 19.73918867  | -5.71906760  | 0.00000000 |
| C | 19.67333535  | -2.87602411  | 0.00000000 |
| C | 19.67635899  | -1.46982929  | 0.00000000 |
| C | 19.67635955  | 1.46984265   | 0.00000000 |
| C | 19.67333651  | 2.87603711   | 0.00000000 |
| C | 19.73919076  | 5.71907904   | 0.00000000 |
| C | 19.71962591  | 7.12111329   | 0.00000000 |
| C | 20.92962542  | -4.97965301  | 0.00000000 |
| C | 20.93440735  | -3.58200670  | 0.00000000 |
| C | 20.84171596  | -0.72516075  | 0.00000000 |
| C | 20.84171615  | 0.72517402   | 0.00000000 |
| C | 20.93440834  | 3.58201915   | 0.00000000 |
| C | 20.92962688  | 4.97966484   | 0.00000000 |
| C | 22.11552661  | -2.81697365  | 0.00000000 |
| C | 22.10078658  | -1.42988065  | 0.00000000 |
| C | 22.10078685  | 1.42989347   | 0.00000000 |
| C | 22.11552717  | 2.81698616   | 0.00000000 |
| C | 23.31581488  | -0.68033891  | 0.00000000 |
| C | 23.31581496  | 0.68035156   | 0.00000000 |
| H | -24.26223842 | -1.23851118  | 0.00000000 |
| H | -24.26223808 | 1.23850348   | 0.00000000 |
| H | -23.08450218 | -3.33812010  | 0.00000000 |
| H | -23.08450129 | 3.33811218   | 0.00000000 |
| H | -21.88951140 | -5.51708566  | 0.00000000 |
| H | -21.88950997 | 5.51707763   | 0.00000000 |

|   |              |              |            |
|---|--------------|--------------|------------|
| H | -20.67589857 | -7.66497930  | 0.00000000 |
| H | -20.67589673 | 7.66497145   | 0.00000000 |
| H | -19.45264794 | -9.80301627  | 0.00000000 |
| H | -19.45264580 | 9.80300895   | 0.00000000 |
| H | -18.69843025 | -0.96887454  | 0.00000000 |
| H | -18.69842981 | 0.96886534   | 0.00000000 |
| H | -18.21876209 | -11.93395505 | 0.00000000 |
| H | -18.21875973 | 11.93394857  | 0.00000000 |
| H | -17.52610688 | -3.06689302  | 0.00000000 |
| H | -17.52610549 | 3.06688379   | 0.00000000 |
| H | -16.97381688 | -14.05892397 | 0.00000000 |
| H | -16.97381436 | 14.05891853  | 0.00000000 |
| H | -16.32577850 | -5.18988373  | 0.00000000 |
| H | -16.32577618 | 5.18987493   | 0.00000000 |
| H | -15.71621954 | -16.18036628 | 0.00000000 |
| H | -15.71621695 | 16.18036189  | 0.00000000 |
| H | -15.11485929 | -7.30536293  | 0.00000000 |
| H | -15.11485615 | 7.30535494   | 0.00000000 |
| H | -14.42401967 | -18.30095252 | 0.00000000 |
| H | -14.42401714 | 18.30094922  | 0.00000000 |
| H | -13.89359231 | -9.41444998  | 0.00000000 |
| H | -13.89358854 | 9.41444318   | 0.00000000 |
| H | -13.19313549 | -20.36791259 | 0.00000000 |
| H | -13.19313289 | 20.36791028  | 0.00000000 |
| H | -12.66160926 | -11.51816777 | 0.00000000 |
| H | -12.66160512 | 11.51816233  | 0.00000000 |
| H | -11.41819852 | -13.61701880 | 0.00000000 |
| H | -11.41819424 | 13.61701473  | 0.00000000 |
| H | -11.04662119 | -21.60463434 | 0.00000000 |
| H | -11.04661844 | 21.60463292  | 0.00000000 |
| H | -10.18278484 | -15.68035740 | 0.00000000 |
| H | -10.18278065 | 15.68035453  | 0.00000000 |
| H | -8.64111957  | -21.63251422 | 0.00000000 |
| H | -8.50189199  | -16.64918123 | 0.00000000 |
| H | -8.50188710  | 16.64917936  | 0.00000000 |
| H | -8.64111583  | 21.63251368  | 0.00000000 |
| H | -6.15830026  | -21.68673023 | 0.00000000 |
| H | -6.09722835  | -16.68262973 | 0.00000000 |
| H | -6.09722254  | 16.68262829  | 0.00000000 |
| H | -6.15829530  | 21.68673032  | 0.00000000 |
| H | -3.69265903  | -21.71057655 | 0.00000000 |
| H | -3.65754844  | -16.70553905 | 0.00000000 |
| H | -3.65754151  | 16.70553794  | 0.00000000 |
| H | -3.69265261  | 21.71057705  | 0.00000000 |
| H | -1.23067342  | -21.72228174 | 0.00000000 |
| H | -1.21902365  | -16.71665611 | 0.00000000 |
| H | -1.21901556  | 16.71665521  | 0.00000000 |
| H | -1.23066547  | 21.72228232  | 0.00000000 |
| H | 1.23066494   | -21.72228129 | 0.00000000 |
| H | 1.21901218   | -16.71665519 | 0.00000000 |
| H | 1.21902134   | 16.71665441  | 0.00000000 |
| H | 1.23067420   | 21.72228163  | 0.00000000 |
| H | 3.69265180   | -21.71057504 | 0.00000000 |
| H | 3.65753804   | -16.70553627 | 0.00000000 |
| H | 3.65754794   | 16.70553561  | 0.00000000 |
| H | 3.69266187   | 21.71057499  | 0.00000000 |
| H | 6.15829475   | -21.68672744 | 0.00000000 |
| H | 6.09721981   | -16.68262515 | 0.00000000 |
| H | 6.09723007   | 16.68262465  | 0.00000000 |
| H | 6.15830515   | 21.68672702  | 0.00000000 |
| H | 8.64111565   | -21.63251022 | 0.00000000 |
| H | 8.50188545   | -16.64917505 | 0.00000000 |
| H | 8.50189561   | 16.64917479  | 0.00000000 |
| H | 8.64112596   | 21.63250946  | 0.00000000 |
| H | 10.18277922  | -15.68034872 | 0.00000000 |
| H | 10.18278910  | 15.68034931  | 0.00000000 |
| H | 11.04661928  | -21.60462862 | 0.00000000 |
| H | 11.04662904  | 21.60462768  | 0.00000000 |
| H | 11.41819233  | -13.61700781 | 0.00000000 |
| H | 11.41820206  | 13.61701007  | 0.00000000 |
| H | 12.66160319  | -11.51815439 | 0.00000000 |
| H | 12.66161218  | 11.51815896  | 0.00000000 |
| H | 13.19313325  | -20.36790518 | 0.00000000 |
| H | 13.19314253  | 20.36790432  | 0.00000000 |
| H | 13.89358659  | -9.41443484  | 0.00000000 |
| H | 13.89359434  | 9.41444207   | 0.00000000 |
| H | 14.42401754  | -18.30094332 | 0.00000000 |
| H | 14.42402587  | 18.30094330  | 0.00000000 |
| H | 15.11485408  | -7.30534698  | 0.00000000 |
| H | 15.11486012  | 7.30535680   | 0.00000000 |
| H | 15.71621722  | -16.18035508 | 0.00000000 |
| H | 15.71622462  | 16.18035645  | 0.00000000 |
| H | 16.32577380  | -5.18986804  | 0.00000000 |

|   |             |              |            |
|---|-------------|--------------|------------|
| H | 16.32577790 | 5.18987992   | 0.00000000 |
| H | 16.97381442 | -14.05891115 | 0.00000000 |
| H | 16.97382062 | 14.05891435  | 0.00000000 |
| H | 17.52610284 | -3.06687816  | 0.00000000 |
| H | 17.52610508 | 3.06689127   | 0.00000000 |
| H | 18.21875954 | -11.93394071 | 0.00000000 |
| H | 18.21876431 | 11.93394619  | 0.00000000 |
| H | 18.69842698 | -0.96886115  | 0.00000000 |
| H | 18.69842764 | 0.96887454   | 0.00000000 |
| H | 19.45264498 | -9.80300116  | 0.00000000 |
| H | 19.45264838 | 9.80300899   | 0.00000000 |
| H | 20.67589497 | -7.66496447  | 0.00000000 |
| H | 20.67589721 | 7.66497433   | 0.00000000 |
| H | 21.88950716 | -5.51707229  | 0.00000000 |
| H | 21.88950845 | 5.51708351   | 0.00000000 |
| H | 23.08449790 | -3.33810837  | 0.00000000 |
| H | 23.08449843 | 3.33812041   | 0.00000000 |
| H | 24.26223413 | -1.23850016  | 0.00000000 |
| H | 24.26223431 | 1.23851250   | 0.00000000 |

## 11-HGQR (triplet)

|   |              |              |            |
|---|--------------|--------------|------------|
| C | -25.77372936 | -0.68024104  | 0.00000000 |
| C | -25.77372941 | 0.68023886   | 0.00000000 |
| C | -24.57379467 | -2.81648649  | 0.00000000 |
| C | -24.55848190 | -1.42951197  | 0.00000000 |
| C | -24.55848199 | 1.42950989   | 0.00000000 |
| C | -24.57379485 | 2.81648446   | 0.00000000 |
| C | -23.38949637 | -4.97945723  | 0.00000000 |
| C | -23.39304137 | -3.58171067  | 0.00000000 |
| C | -23.29921207 | -0.72530073  | 0.00000000 |
| C | -23.29921211 | 0.72529870   | 0.00000000 |
| C | -23.39304155 | 3.58170876   | 0.00000000 |
| C | -23.38949659 | 4.97945543   | 0.00000000 |
| C | -22.18203115 | -7.12187990  | 0.00000000 |
| C | -22.19997025 | -5.71934034  | 0.00000000 |
| C | -22.13164661 | -2.87673955  | 0.00000000 |
| C | -22.13403540 | -1.47045860  | 0.00000000 |
| C | -22.13403546 | 1.47045667   | 0.00000000 |
| C | -22.13164670 | 2.87673767   | 0.00000000 |
| C | -22.19997043 | 5.71933870   | 0.00000000 |
| C | -22.18203135 | 7.12187840   | 0.00000000 |
| C | -20.96511747 | -9.25635591  | 0.00000000 |
| C | -20.99088395 | -7.85373745  | 0.00000000 |
| C | -20.93515678 | -5.00603044  | 0.00000000 |
| C | -20.94383360 | -3.60820013  | 0.00000000 |
| C | -20.94383367 | 3.60819839   | 0.00000000 |
| C | -20.93515686 | 5.00602880   | 0.00000000 |
| C | -20.99088407 | 7.85373613   | 0.00000000 |
| C | -20.96511760 | 9.25635476   | 0.00000000 |
| C | -19.73864898 | -11.38420391 | 0.00000000 |
| C | -19.77042690 | -9.98366990  | 0.00000000 |
| C | -19.72748963 | -7.13337440  | 0.00000000 |
| C | -19.74253115 | -5.73840062  | 0.00000000 |
| C | -19.74253117 | 5.73839915   | 0.00000000 |
| C | -19.72748964 | 7.13337309   | 0.00000000 |
| C | -19.77042692 | 9.98366895   | 0.00000000 |
| C | -19.73864900 | 11.38420312  | 0.00000000 |
| C | -18.50252513 | -13.50631366 | 0.00000000 |
| C | -18.53937475 | -12.10811270 | 0.00000000 |
| C | -18.50941736 | -9.25684985  | 0.00000000 |
| C | -18.53187001 | -7.86127413  | 0.00000000 |
| C | -18.53186993 | 7.86127300   | 0.00000000 |
| C | -18.50941727 | 9.25684889   | 0.00000000 |
| C | -18.53937467 | 12.10811208  | 0.00000000 |
| C | -18.50252506 | 13.50631319  | 0.00000000 |
| C | -17.25635624 | -15.62341178 | 0.00000000 |
| C | -17.29853195 | -14.22606483 | 0.00000000 |
| C | -17.28171033 | -11.37550339 | 0.00000000 |
| C | -17.31186567 | -9.97788797  | 0.00000000 |
| C | -17.31186550 | 9.97788719   | 0.00000000 |
| C | -17.28171016 | 11.37550278  | 0.00000000 |
| C | -17.29853181 | 14.22606450  | 0.00000000 |
| C | -17.25635612 | 15.62341158  | 0.00000000 |
| C | -15.99934987 | -17.73643489 | 0.00000000 |
| C | -16.04872378 | -16.33654064 | 0.00000000 |
| C | -16.04515558 | -13.48836376 | 0.00000000 |
| C | -16.08211260 | -12.08896395 | 0.00000000 |
| C | -16.08211236 | 12.08896350  | 0.00000000 |
| C | -16.04515535 | 13.48836344  | 0.00000000 |
| C | -16.04872360 | 16.33654055  | 0.00000000 |
| C | -15.99934972 | 17.73643488  | 0.00000000 |
| C | -14.71438642 | -19.84005378 | 0.00000000 |
| C | -14.78900908 | -18.43513533 | 0.00000000 |
| C | -14.80053058 | -15.59448273 | 0.00000000 |

|   |              |              |            |
|---|--------------|--------------|------------|
| C | -14.84251939 | -14.19540482 | 0.00000000 |
| C | -14.84251912 | 14.19540465  | 0.00000000 |
| C | -14.80053033 | 15.59448265  | 0.00000000 |
| C | -14.78900890 | 18.43513541  | 0.00000000 |
| C | -14.71438626 | 19.84005392  | 0.00000000 |
| C | -13.46184007 | -21.94486795 | 0.00000000 |
| C | -13.50444680 | -20.51786613 | 0.00000000 |
| C | -13.54939660 | -17.69241924 | 0.00000000 |
| C | -13.59248623 | -16.29791688 | 0.00000000 |
| C | -13.59248596 | 16.29791691  | 0.00000000 |
| C | -13.54939636 | 17.69241935  | 0.00000000 |
| C | -13.50444662 | 20.51786633  | 0.00000000 |
| C | -13.46183993 | 21.94486817  | 0.00000000 |
| C | -12.28302252 | -22.62365427 | 0.00000000 |
| C | -12.26612451 | -19.77711756 | 0.00000000 |
| C | -12.33125343 | -18.39532634 | 0.00000000 |
| C | -12.33125320 | 18.39532654  | 0.00000000 |
| C | -12.26612428 | 19.77711781  | 0.00000000 |
| C | -12.28302237 | 22.62365456  | 0.00000000 |
| C | -11.02763129 | -21.94396772 | 0.00000000 |
| C | -11.00903902 | -20.50101252 | 0.00000000 |
| C | -11.00903878 | 20.50101284  | 0.00000000 |
| C | -11.02763110 | 21.94396804  | 0.00000000 |
| C | -9.83390396  | -22.64991955 | 0.00000000 |
| C | -9.78136558  | -19.86375270 | 0.00000000 |
| C | -9.78136527  | 19.86375307  | 0.00000000 |
| C | -9.83390377  | 22.64991991  | 0.00000000 |
| C | -8.58143304  | -22.00914610 | 0.00000000 |
| C | -8.56176697  | -20.56409021 | 0.00000000 |
| C | -8.56176667  | 20.56409065  | 0.00000000 |
| C | -8.58143279  | 22.00914653  | 0.00000000 |
| C | -7.36951959  | -22.70499594 | 0.00000000 |
| C | -7.33420484  | -19.90110516 | 0.00000000 |
| C | -7.33420449  | 19.90110565  | 0.00000000 |
| C | -7.36951934  | 22.70499640  | 0.00000000 |
| C | -6.13420204  | -22.04475302 | 0.00000000 |
| C | -6.11922429  | -20.59256268 | 0.00000000 |
| C | -6.11922394  | 20.59256321  | 0.00000000 |
| C | -6.13420174  | 22.04475354  | 0.00000000 |
| C | -4.91131152  | -22.73118604 | 0.00000000 |
| C | -4.88809508  | -19.92654473 | 0.00000000 |
| C | -4.88809469  | 19.92654530  | 0.00000000 |
| C | -4.91131120  | 22.73118658  | 0.00000000 |
| C | -3.68176537  | -22.06620171 | 0.00000000 |
| C | -3.67277206  | -20.61170858 | 0.00000000 |
| C | -3.67277165  | 20.61170917  | 0.00000000 |
| C | -3.68176498  | 22.06620230  | 0.00000000 |
| C | -2.45522825  | -22.74655021 | 0.00000000 |
| C | -2.44365689  | -19.94154030 | 0.00000000 |
| C | -2.44365643  | 19.94154090  | 0.00000000 |
| C | -2.45522781  | 22.74655079  | 0.00000000 |
| C | -1.22747255  | -22.07690048 | 0.00000000 |
| C | -1.22447521  | -20.62124284 | 0.00000000 |
| C | -1.22447470  | 20.62124344  | 0.00000000 |
| C | -1.22747204  | 22.07690109  | 0.00000000 |
| C | -0.00001842  | -22.75160543 | 0.00000000 |
| C | -0.00001373  | -19.94658880 | 0.00000000 |
| C | -0.00001315  | 19.94658938  | 0.00000000 |
| C | -0.00001781  | 22.75160603  | 0.00000000 |
| C | 1.22743811   | -22.07690459 | 0.00000000 |
| C | 1.22444565   | -20.62124689 | 0.00000000 |
| C | 1.22444633   | 20.62124745  | 0.00000000 |
| C | 1.22743881   | 22.07690518  | 0.00000000 |
| C | 2.45519200   | -22.74655848 | 0.00000000 |
| C | 2.44362982   | -19.94154845 | 0.00000000 |
| C | 2.44363059   | 19.94154897  | 0.00000000 |
| C | 2.45519285   | 22.74655905  | 0.00000000 |
| C | 3.68173200   | -22.06621393 | 0.00000000 |
| C | 3.67274334   | -20.61172060 | 0.00000000 |
| C | 3.67274422   | 20.61172108  | 0.00000000 |
| C | 3.68173294   | 22.06621447  | 0.00000000 |
| C | 4.91127697   | -22.73120229 | 0.00000000 |
| C | 4.88806927   | -19.92656069 | 0.00000000 |
| C | 4.88807025   | 19.92656113  | 0.00000000 |
| C | 4.91127808   | 22.73120279  | 0.00000000 |
| C | 6.13417069   | -22.04477304 | 0.00000000 |
| C | 6.11919730   | -20.59258235 | 0.00000000 |
| C | 6.11919842   | 20.59258272  | 0.00000000 |
| C | 6.13417188   | 22.04477347  | 0.00000000 |
| C | 7.36948749   | -22.70501977 | 0.00000000 |
| C | 7.33418105   | -19.90112851 | 0.00000000 |
| C | 7.33418222   | 19.90112882  | 0.00000000 |
| C | 7.36948881   | 22.70502013  | 0.00000000 |

|   |             |              |            |
|---|-------------|--------------|------------|
| C | 8.58140428  | -22.00917347 | 0.00000000 |
| C | 8.56174243  | -20.56411709 | 0.00000000 |
| C | 8.56174372  | 20.56411733  | 0.00000000 |
| C | 8.58140565  | 22.00917374  | 0.00000000 |
| C | 9.83387462  | -22.64995068 | 0.00000000 |
| C | 9.78134412  | -19.86378294 | 0.00000000 |
| C | 9.78134543  | 19.86378312  | 0.00000000 |
| C | 9.83387610  | 22.64995088  | 0.00000000 |
| C | 11.02760548 | -21.94400177 | 0.00000000 |
| C | 11.00901762 | -20.50104568 | 0.00000000 |
| C | 11.00901905 | 20.50104577  | 0.00000000 |
| C | 11.02760697 | 21.94400187  | 0.00000000 |
| C | 12.28299599 | -22.62369183 | 0.00000000 |
| C | 12.26610621 | -19.77715343 | 0.00000000 |
| C | 12.33123992 | -18.39536047 | 0.00000000 |
| C | 12.33124130 | 18.39536048  | 0.00000000 |
| C | 12.26610762 | 19.77715344  | 0.00000000 |
| C | 12.28299755 | 22.62369185  | 0.00000000 |
| C | 13.46181685 | -21.94490776 | 0.00000000 |
| C | 13.50442782 | -20.51790499 | 0.00000000 |
| C | 13.54938591 | -17.69245481 | 0.00000000 |
| C | 13.59247970 | -16.29795022 | 0.00000000 |
| C | 13.59248097 | 16.29795022  | 0.00000000 |
| C | 13.54938724 | 17.69245477  | 0.00000000 |
| C | 13.50442928 | 20.51790492  | 0.00000000 |
| C | 13.46181839 | 21.94490770  | 0.00000000 |
| C | 14.71437060 | -19.84009430 | 0.00000000 |
| C | 14.78899759 | -18.43517431 | 0.00000000 |
| C | 14.80052729 | -15.59451676 | 0.00000000 |
| C | 14.84252033 | -14.19543628 | 0.00000000 |
| C | 14.84252147 | 14.19543635  | 0.00000000 |
| C | 14.80052850 | 15.59451676  | 0.00000000 |
| C | 14.78899893 | 18.43517421  | 0.00000000 |
| C | 14.71437201 | 19.84009419  | 0.00000000 |
| C | 15.99934141 | -17.73647472 | 0.00000000 |
| C | 16.04871990 | -16.33657823 | 0.00000000 |
| C | 16.04515992 | -13.48839509 | 0.00000000 |
| C | 16.08212118 | -12.08899235 | 0.00000000 |
| C | 16.08212216 | 12.08899256  | 0.00000000 |
| C | 16.04516098 | 13.48839519  | 0.00000000 |
| C | 16.04872110 | 16.33657816  | 0.00000000 |
| C | 15.99934267 | 17.73647460  | 0.00000000 |
| C | 17.25635565 | -15.62344957 | 0.00000000 |
| C | 17.29853601 | -14.22609959 | 0.00000000 |
| C | 17.28172225 | -11.37553084 | 0.00000000 |
| C | 17.31188162 | -9.97791213  | 0.00000000 |
| C | 17.31188241 | 9.97791254   | 0.00000000 |
| C | 17.28172312 | 11.37553111  | 0.00000000 |
| C | 17.29853703 | 14.22609962  | 0.00000000 |
| C | 17.25635676 | 15.62344951  | 0.00000000 |
| C | 18.50253272 | -13.50634775 | 0.00000000 |
| C | 18.53938675 | -12.10814314 | 0.00000000 |
| C | 18.50943643 | -9.25687239  | 0.00000000 |
| C | 18.53189271 | -7.86129308  | 0.00000000 |
| C | 18.53189329 | 7.86129374   | 0.00000000 |
| C | 18.50943711 | 9.25687289   | 0.00000000 |
| C | 18.53938757 | 12.10814333  | 0.00000000 |
| C | 18.50253362 | 13.50634782  | 0.00000000 |
| C | 19.73866458 | -11.38423277 | 0.00000000 |
| C | 19.77044648 | -9.98369485  | 0.00000000 |
| C | 19.72751526 | -7.13339133  | 0.00000000 |
| C | 19.74255981 | -5.73841384  | 0.00000000 |
| C | 19.74256019 | 5.73841472   | 0.00000000 |
| C | 19.72751572 | 7.13339207   | 0.00000000 |
| C | 19.77044708 | 9.98369527   | 0.00000000 |
| C | 19.73866526 | 11.38423303  | 0.00000000 |
| C | 20.96514049 | -9.25637854  | 0.00000000 |
| C | 20.99091042 | -7.85375626  | 0.00000000 |
| C | 20.93518826 | -5.00604150  | 0.00000000 |
| C | 20.94386747 | -3.60820776  | 0.00000000 |
| C | 20.94386767 | 3.60820879   | 0.00000000 |
| C | 20.93518852 | 5.00604243   | 0.00000000 |
| C | 20.99091081 | 7.85375692   | 0.00000000 |
| C | 20.96514094 | 9.25637905   | 0.00000000 |
| C | 22.18206062 | -7.12189607  | 0.00000000 |
| C | 22.20000269 | -5.71935303  | 0.00000000 |
| C | 22.13168311 | -2.87674504  | 0.00000000 |
| C | 22.13407368 | -1.47046140  | 0.00000000 |
| C | 22.13407373 | 1.47046251   | 0.00000000 |
| C | 22.13168322 | 2.87674611   | 0.00000000 |
| C | 22.20000290 | 5.71935390   | 0.00000000 |
| C | 22.18206089 | 7.12189681   | 0.00000000 |
| C | 23.38953126 | -4.97946744  | 0.00000000 |

|   |              |              |            |
|---|--------------|--------------|------------|
| C | 23.39307877  | -3.58171774  | 0.00000000 |
| C | 23.29925217  | -0.72530036  | 0.00000000 |
| C | 23.29925218  | 0.72530148   | 0.00000000 |
| C | 23.39307885  | 3.58171875   | 0.00000000 |
| C | 23.38953137  | 4.97946836   | 0.00000000 |
| C | 24.57383419  | -2.81649163  | 0.00000000 |
| C | 24.55852276  | -1.42951378  | 0.00000000 |
| C | 24.55852277  | 1.42951487   | 0.00000000 |
| C | 24.57383422  | 2.81649267   | 0.00000000 |
| C | 25.77377155  | -0.68024108  | 0.00000000 |
| C | 25.77377155  | 0.68024216   | 0.00000000 |
| H | -26.72004199 | -1.23866056  | 0.00000000 |
| H | -26.72004208 | 1.23865834   | 0.00000000 |
| H | -25.54296434 | -3.33730556  | 0.00000000 |
| H | -25.54296456 | 3.33730351   | 0.00000000 |
| H | -24.34989764 | -5.51600877  | 0.00000000 |
| H | -24.34989791 | 5.51600697   | 0.00000000 |
| H | -23.13907225 | -7.66445375  | 0.00000000 |
| H | -23.13907252 | 7.66445224   | 0.00000000 |
| H | -21.91952942 | -9.80358085  | 0.00000000 |
| H | -21.91952962 | 9.80357970   | 0.00000000 |
| H | -21.15595444 | -0.96967639  | 0.00000000 |
| H | -21.15595444 | 0.96967455   | 0.00000000 |
| H | -20.69045206 | -11.93596823 | 0.00000000 |
| H | -20.69045216 | 11.93596743  | 0.00000000 |
| H | -19.98434183 | -3.06980953  | 0.00000000 |
| H | -19.98434183 | 3.06980784   | 0.00000000 |
| H | -19.45172917 | -14.06252096 | 0.00000000 |
| H | -19.45172917 | 14.06252045  | 0.00000000 |
| H | -18.78582295 | -5.19531278  | 0.00000000 |
| H | -18.78582289 | 5.19531134   | 0.00000000 |
| H | -18.20296515 | -16.18398284 | 0.00000000 |
| H | -18.20296508 | 16.18398259  | 0.00000000 |
| H | -17.57764388 | -7.31381954  | 0.00000000 |
| H | -17.57764374 | 7.31381841   | 0.00000000 |
| H | -16.94262714 | -18.30254392 | 0.00000000 |
| H | -16.94262703 | 18.30254387  | 0.00000000 |
| H | -16.36009236 | -9.42616706  | 0.00000000 |
| H | -16.36009213 | 9.42616628   | 0.00000000 |
| H | -15.64898223 | -20.42066545 | 0.00000000 |
| H | -15.64898212 | 20.42066555  | 0.00000000 |
| H | -15.13277526 | -11.53307365 | 0.00000000 |
| H | -15.13277497 | 11.53307319  | 0.00000000 |
| H | -14.41809254 | -22.48605713 | 0.00000000 |
| H | -14.41809244 | 22.48605731  | 0.00000000 |
| H | -13.89559989 | -13.63542065 | 0.00000000 |
| H | -13.89559958 | 13.63542049  | 0.00000000 |
| H | -12.64806274 | -15.73353364 | 0.00000000 |
| H | -12.64806244 | 15.73353369  | 0.00000000 |
| H | -12.27092264 | -23.72235267 | 0.00000000 |
| H | -12.27092252 | 23.72235296  | 0.00000000 |
| H | -11.40957102 | -17.79700150 | 0.00000000 |
| H | -11.40957079 | 17.79700169  | 0.00000000 |
| H | -9.86676444  | -23.74967082 | 0.00000000 |
| H | -9.72675406  | -18.76629978 | 0.00000000 |
| H | -9.72675369  | 18.76630016  | 0.00000000 |
| H | -9.86676429  | 23.74967117  | 0.00000000 |
| H | -7.38532328  | -23.80497710 | 0.00000000 |
| H | -7.32040697  | -18.80099981 | 0.00000000 |
| H | -7.32040658  | 18.80100031  | 0.00000000 |
| H | -7.38532308  | 23.80497756  | 0.00000000 |
| H | -4.92079293  | -23.83126301 | 0.00000000 |
| H | -4.87925512  | -18.82649204 | 0.00000000 |
| H | -4.87925470  | 18.82649262  | 0.00000000 |
| H | -4.92079263  | 23.83126355  | 0.00000000 |
| H | -2.45994155  | -23.84667706 | 0.00000000 |
| H | -2.43926365  | -18.84145388 | 0.00000000 |
| H | -2.43926316  | 18.84145447  | 0.00000000 |
| H | -2.45994110  | 23.84667765  | 0.00000000 |
| H | -0.00002023  | -23.85174977 | 0.00000000 |
| H | -0.00001197  | -18.84648768 | 0.00000000 |
| H | -0.00001137  | 18.84648824  | 0.00000000 |
| H | -0.00001958  | 23.85175039  | 0.00000000 |
| H | 2.45990176   | -23.84668547 | 0.00000000 |
| H | 2.43924015   | -18.84146198 | 0.00000000 |
| H | 2.43924091   | 18.84146246  | 0.00000000 |
| H | 2.45990266   | 23.84668607  | 0.00000000 |
| H | 4.92075500   | -23.83127951 | 0.00000000 |
| H | 4.87923290   | -18.82650784 | 0.00000000 |
| H | 4.87923384   | 18.82650824  | 0.00000000 |
| H | 4.92075616   | 23.83128005  | 0.00000000 |
| H | 7.38528795   | -23.80500127 | 0.00000000 |
| H | 7.32038655   | -18.80102286 | 0.00000000 |

|   |             |              |            |
|---|-------------|--------------|------------|
| H | 7.32038765  | 18.80102313  | 0.00000000 |
| H | 7.38528933  | 23.80500167  | 0.00000000 |
| H | 9.86673200  | -23.74970240 | 0.00000000 |
| H | 9.72673512  | -18.76632955 | 0.00000000 |
| H | 9.72673631  | 18.76632972  | 0.00000000 |
| H | 9.86673353  | 23.74970262  | 0.00000000 |
| H | 11.40955922 | -17.79703208 | 0.00000000 |
| H | 11.40956056 | 17.79703212  | 0.00000000 |
| H | 12.27089309 | -23.72239060 | 0.00000000 |
| H | 12.27089471 | 23.72239064  | 0.00000000 |
| H | 12.64805697 | -15.73356415 | 0.00000000 |
| H | 12.64805822 | 15.73356420  | 0.00000000 |
| H | 13.89560122 | -13.63544959 | 0.00000000 |
| H | 13.89560235 | 13.63544972  | 0.00000000 |
| H | 14.41806840 | -22.48609957 | 0.00000000 |
| H | 14.41806996 | 22.48609947  | 0.00000000 |
| H | 15.13278393 | -11.53309986 | 0.00000000 |
| H | 15.13278491 | 11.53310014  | 0.00000000 |
| H | 15.64896560 | -20.42070837 | 0.00000000 |
| H | 15.64896703 | 20.42070821  | 0.00000000 |
| H | 16.36010822 | -9.42618927  | 0.00000000 |
| H | 16.36010903 | 9.42618975   | 0.00000000 |
| H | 16.94261803 | -18.30258620 | 0.00000000 |
| H | 16.94261930 | 18.30258605  | 0.00000000 |
| H | 17.57766634 | -7.31383666  | 0.00000000 |
| H | 17.57766696 | 7.31383737   | 0.00000000 |
| H | 18.20296413 | -16.18402308 | 0.00000000 |
| H | 18.20296522 | 16.18402299  | 0.00000000 |
| H | 18.78585117 | -5.19532440  | 0.00000000 |
| H | 18.78585158 | 5.19532531   | 0.00000000 |
| H | 19.45173657 | -14.06255740 | 0.00000000 |
| H | 19.45173744 | 14.06255743  | 0.00000000 |
| H | 19.98437498 | -3.06981608  | 0.00000000 |
| H | 19.98437521 | 3.06981713   | 0.00000000 |
| H | 20.69046776 | -11.93599913 | 0.00000000 |
| H | 20.69046840 | 11.93599935  | 0.00000000 |
| H | 21.15599140 | -0.96967973  | 0.00000000 |
| H | 21.15599147 | 0.96968082   | 0.00000000 |
| H | 21.91955280 | -9.80360511  | 0.00000000 |
| H | 21.91955321 | 9.80360556   | 0.00000000 |
| H | 23.13910219 | -7.66447123  | 0.00000000 |
| H | 23.13910243 | 7.66447190   | 0.00000000 |
| H | 24.34993299 | -5.51602016  | 0.00000000 |
| H | 24.34993309 | 5.51602101   | 0.00000000 |
| H | 25.54300435 | -3.33731174  | 0.00000000 |
| H | 25.54300437 | 3.33731272   | 0.00000000 |
| H | 26.72008486 | -1.23866118  | 0.00000000 |
| H | 26.72008487 | 1.23866223   | 0.00000000 |

## 12-HGQR (triplet)

|   |              |              |            |
|---|--------------|--------------|------------|
| C | -28.23372305 | -0.68015806  | 0.00000000 |
| C | -28.23372347 | 0.68014645   | 0.00000000 |
| C | -27.03410550 | -2.81603812  | 0.00000000 |
| C | -27.01830760 | -1.42925313  | 0.00000000 |
| C | -27.01830841 | 1.42924215   | 0.00000000 |
| C | -27.03410710 | 2.81602728   | 0.00000000 |
| C | -25.85114554 | -4.97922560  | 0.00000000 |
| C | -25.85362906 | -3.58159961  | 0.00000000 |
| C | -25.75877588 | -0.72538569  | 0.00000000 |
| C | -25.75877628 | 0.72537526   | 0.00000000 |
| C | -25.85363087 | 3.58158936   | 0.00000000 |
| C | -25.85114807 | 4.97921564   | 0.00000000 |
| C | -24.64571248 | -7.12239134  | 0.00000000 |
| C | -24.66221483 | -5.71971034  | 0.00000000 |
| C | -24.59185800 | -2.87736527  | 0.00000000 |
| C | -24.59383863 | -1.47090297  | 0.00000000 |
| C | -24.59383932 | 1.47089310   | 0.00000000 |
| C | -24.59185932 | 2.87735547   | 0.00000000 |
| C | -24.66221738 | 5.71970100   | 0.00000000 |
| C | -24.64571563 | 7.12238247   | 0.00000000 |
| C | -23.43149120 | -9.25811983  | 0.00000000 |
| C | -23.45559542 | -7.85494267  | 0.00000000 |
| C | -23.39689266 | -5.00762265  | 0.00000000 |
| C | -23.40451008 | -3.60975101  | 0.00000000 |
| C | -23.40451149 | 3.60974176   | 0.00000000 |
| C | -23.39689467 | 5.00761363   | 0.00000000 |
| C | -23.45559837 | 7.85493447   | 0.00000000 |
| C | -23.43149454 | 9.25811224   | 0.00000000 |
| C | -22.20842478 | -11.38764819 | 0.00000000 |
| C | -22.23839531 | -9.98616403  | 0.00000000 |
| C | -22.19153149 | -7.13628356  | 0.00000000 |
| C | -22.20484501 | -5.74158620  | 0.00000000 |
| C | -22.20484694 | 5.74157774   | 0.00000000 |
| C | -22.19153389 | 7.13627553   | 0.00000000 |

|   |              |              |            |
|---|--------------|--------------|------------|
| C | -22.23839828 | 9.98615719   | 0.00000000 |
| C | -22.20842786 | 11.38764208  | 0.00000000 |
| C | -20.97660491 | -13.51169684 | 0.00000000 |
| C | -21.01134187 | -12.11259817 | 0.00000000 |
| C | -20.97645125 | -9.26146967  | 0.00000000 |
| C | -20.99652652 | -7.86661704  | 0.00000000 |
| C | -20.99652870 | 7.86660963   | 0.00000000 |
| C | -20.97645371 | 9.26146287   | 0.00000000 |
| C | -21.01134448 | 12.11259286  | 0.00000000 |
| C | -20.97660735 | 13.51169231  | 0.00000000 |
| C | -19.73597070 | -15.63075367 | 0.00000000 |
| C | -19.77510601 | -14.23362338 | 0.00000000 |
| C | -19.75222016 | -11.38237623 | 0.00000000 |
| C | -19.77959571 | -9.98581720  | 0.00000000 |
| C | -19.77959785 | 9.98581112   | 0.00000000 |
| C | -19.75222234 | 11.38237089  | 0.00000000 |
| C | -19.77510798 | 14.23361966  | 0.00000000 |
| C | -19.73597229 | 15.63075071  | 0.00000000 |
| C | -18.48617983 | -17.74529504 | 0.00000000 |
| C | -18.53022467 | -16.34854601 | 0.00000000 |
| C | -18.51930951 | -13.49829735 | 0.00000000 |
| C | -18.55367345 | -12.09964108 | 0.00000000 |
| C | -18.55367528 | 12.09963654  | 0.00000000 |
| C | -18.51931116 | 13.49829358  | 0.00000000 |
| C | -18.53022585 | 16.34854382  | 0.00000000 |
| C | -18.48618052 | 17.74529355  | 0.00000000 |
| C | -17.22648122 | -19.85617487 | 0.00000000 |
| C | -17.27732781 | -18.45654725 | 0.00000000 |
| C | -17.27842928 | -15.60866790 | 0.00000000 |
| C | -17.31868825 | -14.20859410 | 0.00000000 |
| C | -17.31868956 | 14.20859117  | 0.00000000 |
| C | -17.27843025 | 15.60866566  | 0.00000000 |
| C | -17.27732817 | 18.45654644  | 0.00000000 |
| C | -17.22648109 | 19.85617464  | 0.00000000 |
| C | -15.93979215 | -21.95807997 | 0.00000000 |
| C | -16.01539497 | -20.55328760 | 0.00000000 |
| C | -16.03032521 | -17.71278928 | 0.00000000 |
| C | -16.07476328 | -16.31342314 | 0.00000000 |
| C | -16.07476393 | 16.31342169  | 0.00000000 |
| C | -16.03032545 | 17.71278842  | 0.00000000 |
| C | -16.01539456 | 20.55328792  | 0.00000000 |
| C | -15.93979135 | 21.95808066  | 0.00000000 |
| C | -14.68672987 | -24.06191893 | 0.00000000 |
| C | -14.72952352 | -22.63488379 | 0.00000000 |
| C | -14.77656539 | -19.80932160 | 0.00000000 |
| C | -14.82136212 | -18.41476328 | 0.00000000 |
| C | -14.82136209 | 18.41476308  | 0.00000000 |
| C | -14.77656494 | 19.80932190  | 0.00000000 |
| C | -14.72952242 | 22.63488490  | 0.00000000 |
| C | -14.68672872 | 24.06192027  | 0.00000000 |
| C | -13.50785642 | -24.74021697 | 0.00000000 |
| C | -13.49164428 | -21.89324993 | 0.00000000 |
| C | -13.55776262 | -20.51149619 | 0.00000000 |
| C | -13.55776194 | 20.51149693  | 0.00000000 |
| C | -13.49164293 | 21.89325120  | 0.00000000 |
| C | -13.50785484 | 24.74021867  | 0.00000000 |
| C | -12.25279073 | -24.05984419 | 0.00000000 |
| C | -12.23416454 | -22.61681584 | 0.00000000 |
| C | -12.23416281 | 22.61681744  | 0.00000000 |
| C | -12.25278891 | 24.05984594  | 0.00000000 |
| C | -11.05930595 | -24.76580008 | 0.00000000 |
| C | -11.00644455 | -21.97962315 | 0.00000000 |
| C | -11.00644207 | 21.97962516  | 0.00000000 |
| C | -11.05930379 | 24.76580202  | 0.00000000 |
| C | -9.80687201  | -24.12511282 | 0.00000000 |
| C | -9.78668819  | -22.68009604 | 0.00000000 |
| C | -9.78668545  | 22.68009821  | 0.00000000 |
| C | -9.80686942  | 24.12511500  | 0.00000000 |
| C | -8.59549956  | -24.82160472 | 0.00000000 |
| C | -8.55865129  | -22.01775396 | 0.00000000 |
| C | -8.55864805  | 22.01775631  | 0.00000000 |
| C | -8.59549664  | 24.82160704  | 0.00000000 |
| C | -7.36010500  | -24.16195864 | 0.00000000 |
| C | -7.34401823  | -22.70993790 | 0.00000000 |
| C | -7.34401463  | 22.70994035  | 0.00000000 |
| C | -7.36010156  | 24.16196112  | 0.00000000 |
| C | -6.13777813  | -24.84958596 | 0.00000000 |
| C | -6.11183581  | -22.04509263 | 0.00000000 |
| C | -6.11183176  | 22.04509517  | 0.00000000 |
| C | -6.13777431  | 24.84958857  | 0.00000000 |
| C | -4.90824295  | -24.18571897 | 0.00000000 |
| C | -4.89752570  | -22.73149847 | 0.00000000 |
| C | -4.89752126  | 22.73150111  | 0.00000000 |

|   |             |              |            |
|---|-------------|--------------|------------|
| C | -4.90823861 | 24.18572165  | 0.00000000 |
| C | -3.68208898 | -24.86777345 | 0.00000000 |
| C | -3.66658776 | -22.06306217 | 0.00000000 |
| C | -3.66658289 | 22.06306483  | 0.00000000 |
| C | -3.68208423 | 24.86777624  | 0.00000000 |
| C | -2.45454066 | -24.19985430 | 0.00000000 |
| C | -2.44919014 | -22.74445112 | 0.00000000 |
| C | -2.44918488 | 22.74445386  | 0.00000000 |
| C | -2.45453543 | 24.19985707  | 0.00000000 |
| C | -1.22727859 | -24.87670765 | 0.00000000 |
| C | -1.22212056 | -22.07215818 | 0.00000000 |
| C | -1.22211491 | 22.07216089  | 0.00000000 |
| C | -1.22727293 | 24.87671048  | 0.00000000 |
| C | 0.00000136  | -24.20452865 | 0.00000000 |
| C | 0.00000122  | -22.74880286 | 0.00000000 |
| C | 0.00000724  | 22.74880560  | 0.00000000 |
| C | 0.00000742  | 24.20453139  | 0.00000000 |
| C | 1.22728126  | -24.87670725 | 0.00000000 |
| C | 1.22212270  | -22.07215811 | 0.00000000 |
| C | 1.22212900  | 22.07216078  | 0.00000000 |
| C | 1.22728773  | 24.87670996  | 0.00000000 |
| C | 2.45454294  | -24.19985364 | 0.00000000 |
| C | 2.44919214  | -22.74445085 | 0.00000000 |
| C | 2.44919875  | 22.74445346  | 0.00000000 |
| C | 2.45454966  | 24.19985619  | 0.00000000 |
| C | 3.68209081  | -24.86777232 | 0.00000000 |
| C | 3.66658910  | -22.06306193 | 0.00000000 |
| C | 3.66659585  | 22.06306444  | 0.00000000 |
| C | 3.68209788  | 24.86777473  | 0.00000000 |
| C | 4.90824405  | -24.18571775 | 0.00000000 |
| C | 4.89752655  | -22.73149790 | 0.00000000 |
| C | 4.89753353  | 22.73150025  | 0.00000000 |
| C | 4.90825124  | 24.18571998  | 0.00000000 |
| C | 6.13777859  | -24.84958429 | 0.00000000 |
| C | 6.11183582  | -22.04509211 | 0.00000000 |
| C | 6.11184281  | 22.04509434  | 0.00000000 |
| C | 6.13778606  | 24.84958626  | 0.00000000 |
| C | 7.36010460  | -24.16195699 | 0.00000000 |
| C | 7.34401760  | -22.70993696 | 0.00000000 |
| C | 7.34402475  | 22.70993892  | 0.00000000 |
| C | 7.36011204  | 24.16195876  | 0.00000000 |
| C | 8.59549858  | -24.82160265 | 0.00000000 |
| C | 8.55864986  | -22.01775304 | 0.00000000 |
| C | 8.55865692  | 22.01775487  | 0.00000000 |
| C | 8.59550629  | 24.82160402  | 0.00000000 |
| C | 9.80687017  | -24.12511075 | 0.00000000 |
| C | 9.78668616  | -22.68009464 | 0.00000000 |
| C | 9.78669338  | 22.68009602  | 0.00000000 |
| C | 9.80687772  | 24.12511186  | 0.00000000 |
| C | 11.05930372 | -24.76579753 | 0.00000000 |
| C | 11.00644181 | -21.97962162 | 0.00000000 |
| C | 11.00644877 | 21.97962279  | 0.00000000 |
| C | 11.05931146 | 24.76579803  | 0.00000000 |
| C | 12.25278788 | -24.05984179 | 0.00000000 |
| C | 12.23416123 | -22.61681395 | 0.00000000 |
| C | 12.23416849 | 22.61681441  | 0.00000000 |
| C | 12.25279540 | 24.05984205  | 0.00000000 |
| C | 13.50785308 | -24.74021454 | 0.00000000 |
| C | 13.49164061 | -21.89324816 | 0.00000000 |
| C | 13.55775877 | -20.51149502 | 0.00000000 |
| C | 13.55776638 | 20.51149535  | 0.00000000 |
| C | 13.49164785 | 21.89324833  | 0.00000000 |
| C | 13.50786050 | 24.74021454  | 0.00000000 |
| C | 14.68672613 | -24.06191670 | 0.00000000 |
| C | 14.72951939 | -22.63488200 | 0.00000000 |
| C | 14.77656125 | -19.80932086 | 0.00000000 |
| C | 14.82135777 | -18.41476309 | 0.00000000 |
| C | 14.82136540 | 18.41476384  | 0.00000000 |
| C | 14.77656865 | 19.80932126  | 0.00000000 |
| C | 14.72952642 | 22.63488192  | 0.00000000 |
| C | 14.68673345 | 24.06191643  | 0.00000000 |
| C | 15.93978765 | -21.95807854 | 0.00000000 |
| C | 16.01539047 | -20.55328660 | 0.00000000 |
| C | 16.03032052 | -17.71278946 | 0.00000000 |
| C | 16.07475828 | -16.31342375 | 0.00000000 |
| C | 16.07476564 | 16.31342495  | 0.00000000 |
| C | 16.03032777 | 17.71279020  | 0.00000000 |
| C | 16.01539742 | 20.55328668  | 0.00000000 |
| C | 15.93979436 | 21.95807834  | 0.00000000 |
| C | 17.22647644 | -19.85617438 | 0.00000000 |
| C | 17.27732284 | -18.45654719 | 0.00000000 |
| C | 17.27842398 | -15.60866877 | 0.00000000 |
| C | 17.31868263 | -14.20859513 | 0.00000000 |

|   |              |              |            |
|---|--------------|--------------|------------|
| C | 17.31868950  | 14.20859700  | 0.00000000 |
| C | 17.27843084  | 15.60867009  | 0.00000000 |
| C | 17.27732957  | 18.45654760  | 0.00000000 |
| C | 17.22648298  | 19.85617447  | 0.00000000 |
| C | 18.48617461  | -17.74529537 | 0.00000000 |
| C | 18.53021922  | -16.34854669 | 0.00000000 |
| C | 18.51930376  | -13.49829840 | 0.00000000 |
| C | 18.55366746  | -12.09964185 | 0.00000000 |
| C | 18.55367351  | 12.09964457  | 0.00000000 |
| C | 18.51931001  | 13.49830050  | 0.00000000 |
| C | 18.53022553  | 16.34854761  | 0.00000000 |
| C | 18.48618083  | 17.74529581  | 0.00000000 |
| C | 19.73596524  | -15.63075456 | 0.00000000 |
| C | 19.77510038  | -14.23362437 | 0.00000000 |
| C | 19.75221431  | -11.38237666 | 0.00000000 |
| C | 19.77958978  | -9.98581689  | 0.00000000 |
| C | 19.77959478  | 9.98582061   | 0.00000000 |
| C | 19.75221973  | 11.38237974  | 0.00000000 |
| C | 19.77510610  | 14.23362607  | 0.00000000 |
| C | 19.73597097  | 15.63075563  | 0.00000000 |
| C | 20.97659958  | -13.51169772 | 0.00000000 |
| C | 21.01133650  | -12.11259875 | 0.00000000 |
| C | 20.97644576  | -9.26146866  | 0.00000000 |
| C | 20.99652108  | -7.86661497  | 0.00000000 |
| C | 20.99652489  | 7.86661972   | 0.00000000 |
| C | 20.97645018  | 9.26147279   | 0.00000000 |
| C | 21.01134146  | 12.11260141  | 0.00000000 |
| C | 20.97660473  | 13.51169970  | 0.00000000 |
| C | 22.20842003  | -11.38764825 | 0.00000000 |
| C | 22.23839063  | -9.98616334  | 0.00000000 |
| C | 22.19152672  | -7.13628057  | 0.00000000 |
| C | 22.20484037  | -5.74158207  | 0.00000000 |
| C | 22.20484297  | 5.74158773   | 0.00000000 |
| C | 22.19153002  | 7.13628569   | 0.00000000 |
| C | 22.23839471  | 9.98616705   | 0.00000000 |
| C | 22.20842448  | 11.38765129  | 0.00000000 |
| C | 23.43148732  | -9.25811829  | 0.00000000 |
| C | 23.45559164  | -7.85494008  | 0.00000000 |
| C | 23.39688877  | -5.00761757  | 0.00000000 |
| C | 23.40450633  | -3.60974498  | 0.00000000 |
| C | 23.40450782  | 3.60975125   | 0.00000000 |
| C | 23.39689094  | 5.00762347   | 0.00000000 |
| C | 23.45559476  | 7.85494477   | 0.00000000 |
| C | 23.43149095  | 9.25812242   | 0.00000000 |
| C | 24.64570950  | -7.12238779  | 0.00000000 |
| C | 24.66221193  | -5.71970566  | 0.00000000 |
| C | 24.59185500  | -2.87735849  | 0.00000000 |
| C | 24.59383583  | -1.47089549  | 0.00000000 |
| C | 24.59383637  | 1.47090199   | 0.00000000 |
| C | 24.59185612  | 2.87736480   | 0.00000000 |
| C | 24.66221408  | 5.71971113   | 0.00000000 |
| C | 24.64571222  | 7.12239282   | 0.00000000 |
| C | 25.85114330  | -4.97922014  | 0.00000000 |
| C | 25.85362692  | -3.58159315  | 0.00000000 |
| C | 25.75877369  | -0.72537749  | 0.00000000 |
| C | 25.75877394  | 0.72538384   | 0.00000000 |
| C | 25.85362815  | 3.58159904   | 0.00000000 |
| C | 25.85114510  | 4.97922573   | 0.00000000 |
| C | 27.03410395  | -2.81603121  | 0.00000000 |
| C | 27.01830587  | -1.42924545  | 0.00000000 |
| C | 27.01830634  | 1.42925140   | 0.00000000 |
| C | 27.03410487  | 2.81603700   | 0.00000000 |
| C | 28.23372152  | -0.68014961  | 0.00000000 |
| C | 28.23372173  | 0.68015530   | 0.00000000 |
| H | -29.17986123 | -1.23881430  | 0.00000000 |
| H | -29.17986196 | 1.23880224   | 0.00000000 |
| H | -28.00341129 | -3.33657304  | 0.00000000 |
| H | -28.00341317 | 3.33656184   | 0.00000000 |
| H | -26.81189585 | -5.51511948  | 0.00000000 |
| H | -26.81189868 | 5.51510927   | 0.00000000 |
| H | -25.60330897 | -7.66396243  | 0.00000000 |
| H | -25.60331243 | 7.66395339   | 0.00000000 |
| H | -24.38666628 | -9.80400363  | 0.00000000 |
| H | -24.38666997 | 9.80399592   | 0.00000000 |
| H | -23.61564644 | -0.97032708  | 0.00000000 |
| H | -23.61564685 | 0.97031774   | 0.00000000 |
| H | -23.16121640 | -11.93771512 | 0.00000000 |
| H | -23.16121982 | 11.93770891  | 0.00000000 |
| H | -22.44463104 | -3.07207357  | 0.00000000 |
| H | -22.44463209 | 3.07206475   | 0.00000000 |
| H | -21.92703649 | -14.06583076 | 0.00000000 |
| H | -21.92703923 | 14.06582617  | 0.00000000 |
| H | -21.24755710 | -5.19953720  | 0.00000000 |

|   |              |              |            |
|---|--------------|--------------|------------|
| H | -21.24755866 | 5.19952905   | 0.00000000 |
| H | -20.68404149 | -16.18888233 | 0.00000000 |
| H | -20.68404331 | 16.18887937  | 0.00000000 |
| H | -20.04153026 | -7.32051061  | 0.00000000 |
| H | -20.04153212 | 7.32050336   | 0.00000000 |
| H | -19.43188725 | -18.30736458 | 0.00000000 |
| H | -19.43188808 | 18.30736312  | 0.00000000 |
| H | -18.82687128 | -9.43572580  | 0.00000000 |
| H | -18.82687316 | 9.43571973   | 0.00000000 |
| H | -18.16909371 | -20.42335985 | 0.00000000 |
| H | -18.16909365 | 20.42335966  | 0.00000000 |
| H | -17.60323106 | -11.54561525 | 0.00000000 |
| H | -17.60323269 | 11.54561064  | 0.00000000 |
| H | -16.87398663 | -22.53930951 | 0.00000000 |
| H | -16.87398594 | 22.53931016  | 0.00000000 |
| H | -16.37048607 | -13.65077174 | 0.00000000 |
| H | -16.37048724 | 13.65076872  | 0.00000000 |
| H | -15.64293775 | -24.60312492 | 0.00000000 |
| H | -15.64293678 | 24.60312605  | 0.00000000 |
| H | -15.12876319 | -15.75190096 | 0.00000000 |
| H | -15.12876375 | 15.75189943  | 0.00000000 |
| H | -13.87763293 | -17.84923932 | 0.00000000 |
| H | -13.87763287 | 17.84923904  | 0.00000000 |
| H | -13.49506618 | -25.83887686 | 0.00000000 |
| H | -13.49506450 | 25.83887859  | 0.00000000 |
| H | -12.63643130 | -19.91261704 | 0.00000000 |
| H | -12.63643087 | 19.91261740  | 0.00000000 |
| H | -11.09218699 | -25.86553670 | 0.00000000 |
| H | -10.95188716 | -20.88215925 | 0.00000000 |
| H | -10.95188422 | 20.88216131  | 0.00000000 |
| H | -11.09218495 | 25.86553865  | 0.00000000 |
| H | -8.61185328  | -25.92156249 | 0.00000000 |
| H | -8.54423409  | -20.91766585 | 0.00000000 |
| H | -8.54423076  | 20.91766821  | 0.00000000 |
| H | -8.61185053  | 25.92156479  | 0.00000000 |
| H | -6.14830047  | -25.94964316 | 0.00000000 |
| H | -6.10191127  | -20.94505534 | 0.00000000 |
| H | -6.10190719  | 20.94505792  | 0.00000000 |
| H | -6.14829677  | 25.94964573  | 0.00000000 |
| H | -3.68833891  | -25.96788902 | 0.00000000 |
| H | -3.66064731  | -20.96298293 | 0.00000000 |
| H | -3.66064244  | 20.96298566  | 0.00000000 |
| H | -3.68833424  | 25.96789174  | 0.00000000 |
| H | -1.22934863  | -25.97685565 | 0.00000000 |
| H | -1.22012901  | -20.97204997 | 0.00000000 |
| H | -1.22012341  | 20.97205279  | 0.00000000 |
| H | -1.22934299  | 25.97685839  | 0.00000000 |
| H | 1.22935104   | -25.97685510 | 0.00000000 |
| H | 1.22013047   | -20.97205006 | 0.00000000 |
| H | 1.22013665   | 20.97205287  | 0.00000000 |
| H | 1.22935754   | 25.97685768  | 0.00000000 |
| H | 3.68834065   | -25.96788749 | 0.00000000 |
| H | 3.66064814   | -20.96298310 | 0.00000000 |
| H | 3.66065473   | 20.96298580  | 0.00000000 |
| H | 3.68834782   | 25.96788974  | 0.00000000 |
| H | 6.14830104   | -25.94964097 | 0.00000000 |
| H | 6.10191102   | -20.94505536 | 0.00000000 |
| H | 6.10191781   | 20.94505782  | 0.00000000 |
| H | 6.14830870   | 25.94964276  | 0.00000000 |
| H | 8.61185263   | -25.92155990 | 0.00000000 |
| H | 8.54423252   | -20.91766549 | 0.00000000 |
| H | 8.54423929   | 20.91766759  | 0.00000000 |
| H | 8.61186064   | 25.92156106  | 0.00000000 |
| H | 11.09218502  | -25.86553372 | 0.00000000 |
| H | 10.95188437  | -20.88215827 | 0.00000000 |
| H | 10.95189068  | 20.88215980  | 0.00000000 |
| H | 11.09219302  | 25.86553402  | 0.00000000 |
| H | 12.63642790  | -19.91261612 | 0.00000000 |
| H | 12.63643591  | 19.91261649  | 0.00000000 |
| H | 13.49506276  | -25.83887406 | 0.00000000 |
| H | 13.49507006  | 25.83887387  | 0.00000000 |
| H | 13.87762900  | -17.84923931 | 0.00000000 |
| H | 13.87763691  | 17.84924037  | 0.00000000 |
| H | 15.12875857  | -15.75190162 | 0.00000000 |
| H | 15.12876627  | 15.75190318  | 0.00000000 |
| H | 15.64293385  | -24.60312230 | 0.00000000 |
| H | 15.64294117  | 24.60312153  | 0.00000000 |
| H | 16.37048076  | -13.65077256 | 0.00000000 |
| H | 16.37048803  | 13.65077474  | 0.00000000 |
| H | 16.87398182  | -22.53930794 | 0.00000000 |
| H | 16.87398826  | 22.53930758  | 0.00000000 |
| H | 17.60322517  | -11.54561557 | 0.00000000 |
| H | 17.60323165  | 11.54561854  | 0.00000000 |

|   |             |              |            |
|---|-------------|--------------|------------|
| H | 18.16908859 | -20.42335920 | 0.00000000 |
| H | 18.16909470 | 20.42335923  | 0.00000000 |
| H | 18.82686512 | -9.43572492  | 0.00000000 |
| H | 18.82687052 | 9.43572885   | 0.00000000 |
| H | 19.43188189 | -18.30736456 | 0.00000000 |
| H | 19.43188767 | 18.30736483  | 0.00000000 |
| H | 20.04152428 | -7.32050803  | 0.00000000 |
| H | 20.04152838 | 7.32051300   | 0.00000000 |
| H | 20.68403615 | -16.18888278 | 0.00000000 |
| H | 20.68404146 | 16.18888357  | 0.00000000 |
| H | 21.24755170 | -5.19953275  | 0.00000000 |
| H | 21.24755446 | 5.19953862   | 0.00000000 |
| H | 21.92703161 | -14.06583121 | 0.00000000 |
| H | 21.92703640 | 14.06583279  | 0.00000000 |
| H | 22.44462651 | -3.07206730  | 0.00000000 |
| H | 22.44462805 | 3.07207378   | 0.00000000 |
| H | 23.16121235 | -11.93771493 | 0.00000000 |
| H | 23.16121652 | 11.93771754  | 0.00000000 |
| H | 23.61564288 | -0.97031957  | 0.00000000 |
| H | 23.61564341 | 0.97032618   | 0.00000000 |
| H | 24.38666322 | -9.80400214  | 0.00000000 |
| H | 24.38666666 | 9.80400581   | 0.00000000 |
| H | 25.60330675 | -7.66395917  | 0.00000000 |
| H | 25.60330938 | 7.66396377   | 0.00000000 |
| H | 26.81189419 | -5.51511453  | 0.00000000 |
| H | 26.81189601 | 5.51511968   | 0.00000000 |
| H | 28.00341024 | -3.33656645  | 0.00000000 |
| H | 28.00341125 | 3.33657186   | 0.00000000 |
| H | 29.17986033 | -1.23880575  | 0.00000000 |
| H | 29.17986072 | 1.23881107   | 0.00000000 |

## 13-HGQR (triplet)

|   |              |              |            |
|---|--------------|--------------|------------|
| C | -30.69565596 | -0.68010721  | 0.00000000 |
| C | -30.69565681 | 0.68006099   | 0.00000000 |
| C | -29.49638371 | -2.81569843  | 0.00000000 |
| C | -29.48014375 | -1.42911842  | 0.00000000 |
| C | -29.48014560 | 1.42907391   | 0.00000000 |
| C | -29.49638674 | 2.81565455   | 0.00000000 |
| C | -28.31456376 | -4.97902478  | 0.00000000 |
| C | -28.31608795 | -3.58161011  | 0.00000000 |
| C | -28.22034806 | -0.72551243  | 0.00000000 |
| C | -28.22034892 | 0.72546944   | 0.00000000 |
| C | -28.31609143 | 3.58156828   | 0.00000000 |
| C | -28.31456786 | 4.97898406   | 0.00000000 |
| C | -27.11085888 | -7.12275432  | 0.00000000 |
| C | -27.12603696 | -5.72017210  | 0.00000000 |
| C | -27.05396796 | -2.87796420  | 0.00000000 |
| C | -27.05564428 | -1.47128409  | 0.00000000 |
| C | -27.05564577 | 1.47124283   | 0.00000000 |
| C | -27.05397061 | 2.87792361   | 0.00000000 |
| C | -27.12604103 | 5.72013423   | 0.00000000 |
| C | -27.11086294 | 7.12271819   | 0.00000000 |
| C | -25.89887810 | -9.25945325  | 0.00000000 |
| C | -25.92140212 | -7.85610019  | 0.00000000 |
| C | -25.86023824 | -5.00904872  | 0.00000000 |
| C | -25.86705926 | -3.61098692  | 0.00000000 |
| C | -25.86706219 | 3.61094874   | 0.00000000 |
| C | -25.86024162 | 5.00901200   | 0.00000000 |
| C | -25.92140562 | 7.85606777   | 0.00000000 |
| C | -25.89888098 | 9.25942336   | 0.00000000 |
| C | -24.67855145 | -11.39035825 | 0.00000000 |
| C | -24.70682231 | -9.98827948  | 0.00000000 |
| C | -24.65676243 | -7.13881011  | 0.00000000 |
| C | -24.66876477 | -5.74407276  | 0.00000000 |
| C | -24.66876799 | 5.74403906   | 0.00000000 |
| C | -24.65676530 | 7.13877878   | 0.00000000 |
| C | -24.70682419 | 9.98825415   | 0.00000000 |
| C | -24.67855216 | 11.39033623  | 0.00000000 |
| C | -23.45003418 | -13.51611783 | 0.00000000 |
| C | -23.48302593 | -12.11603876 | 0.00000000 |
| C | -23.44419573 | -9.26535418  | 0.00000000 |
| C | -23.46237642 | -7.87078118  | 0.00000000 |
| C | -23.46237867 | 7.87075369   | 0.00000000 |
| C | -23.44419695 | 9.26532988   | 0.00000000 |
| C | -23.48302533 | 12.11602184  | 0.00000000 |
| C | -23.45003208 | 13.51610466  | 0.00000000 |
| C | -22.21345818 | -15.63705679 | 0.00000000 |
| C | -22.25063854 | -14.23900124 | 0.00000000 |
| C | -22.22301301 | -11.38792200 | 0.00000000 |
| C | -22.24793929 | -9.99209213  | 0.00000000 |
| C | -22.24793945 | 9.99207248   | 0.00000000 |
| C | -22.22301172 | 11.38790605  | 0.00000000 |
| C | -22.25063507 | 14.23899320  | 0.00000000 |
| C | -22.21345317 | 15.63705242  | 0.00000000 |

|   |              |              |            |
|---|--------------|--------------|------------|
| C | -20.96880873 | -17.75341907 | 0.00000000 |
| C | -21.01006515 | -16.35685616 | 0.00000000 |
| C | -20.99347946 | -13.50595389 | 0.00000000 |
| C | -21.02509298 | -12.10836285 | 0.00000000 |
| C | -21.02509038 | 12.10835202  | 0.00000000 |
| C | -20.99347535 | 13.50594680  | 0.00000000 |
| C | -21.01005901 | 16.35685640  | 0.00000000 |
| C | -20.96880130 | 17.75342248  | 0.00000000 |
| C | -19.71577241 | -19.86559338 | 0.00000000 |
| C | -19.76165218 | -18.46907475 | 0.00000000 |
| C | -19.75598981 | -15.61915559 | 0.00000000 |
| C | -19.79378868 | -14.21983698 | 0.00000000 |
| C | -19.79378330 | 14.21983493  | 0.00000000 |
| C | -19.75598315 | 15.61915680  | 0.00000000 |
| C | -19.76164395 | 18.46908189  | 0.00000000 |
| C | -19.71576324 | 19.86560303  | 0.00000000 |
| C | -18.45360285 | -21.97444608 | 0.00000000 |
| C | -18.50593564 | -20.57489149 | 0.00000000 |
| C | -18.51122954 | -17.72721559 | 0.00000000 |
| C | -18.55417150 | -16.32687171 | 0.00000000 |
| C | -18.55416382 | 16.32687729  | 0.00000000 |
| C | -18.51122092 | 17.72722365  | 0.00000000 |
| C | -18.50592587 | 20.57490394  | 0.00000000 |
| C | -18.45359236 | 21.97446041  | 0.00000000 |
| C | -17.16527870 | -24.07471704 | 0.00000000 |
| C | -17.24187345 | -22.66996447 | 0.00000000 |
| C | -17.25994945 | -19.82953915 | 0.00000000 |
| C | -17.30643831 | -18.43014976 | 0.00000000 |
| C | -17.30642905 | 18.43016123  | 0.00000000 |
| C | -17.25993946 | 19.82955228  | 0.00000000 |
| C | -17.24186239 | 22.66998072  | 0.00000000 |
| C | -17.16526699 | 24.07473450  | 0.00000000 |
| C | -15.91155309 | -26.17755127 | 0.00000000 |
| C | -15.95469246 | -24.75049972 | 0.00000000 |
| C | -16.00374286 | -21.92479705 | 0.00000000 |
| C | -16.05004314 | -20.53035080 | 0.00000000 |
| C | -16.05003277 | 20.53032126  | 0.00000000 |
| C | -16.00373172 | 21.92481360  | 0.00000000 |
| C | -15.95468014 | 24.75051867  | 0.00000000 |
| C | -15.91154051 | 26.17757040  | 0.00000000 |
| C | -14.73256662 | -26.85534033 | 0.00000000 |
| C | -14.71721525 | -24.00797202 | 0.00000000 |
| C | -14.78427768 | -22.62630461 | 0.00000000 |
| C | -14.78426624 | 22.62632249  | 0.00000000 |
| C | -14.71720311 | 24.00799063  | 0.00000000 |
| C | -14.73255285 | 26.85535955  | 0.00000000 |
| C | -13.47780877 | -26.17434021 | 0.00000000 |
| C | -13.45926317 | -24.73119621 | 0.00000000 |
| C | -13.45925051 | 24.73121473  | 0.00000000 |
| C | -13.47779555 | 26.17435848  | 0.00000000 |
| C | -12.28452961 | -26.88021008 | 0.00000000 |
| C | -12.23160709 | -24.09396545 | 0.00000000 |
| C | -12.23159454 | 24.09398372  | 0.00000000 |
| C | -12.28451566 | 26.88022730  | 0.00000000 |
| C | -11.03209668 | -26.23948368 | 0.00000000 |
| C | -11.01158193 | -24.79445356 | 0.00000000 |
| C | -11.01156897 | 24.79447100  | 0.00000000 |
| C | -11.03208306 | 26.23950048  | 0.00000000 |
| C | -9.82126694  | -26.93644471 | 0.00000000 |
| C | -9.78332572  | -24.13254933 | 0.00000000 |
| C | -9.78331335  | 24.13256669  | 0.00000000 |
| C | -9.82125334  | 26.93646078  | 0.00000000 |
| C | -8.58566525  | -26.27721826 | 0.00000000 |
| C | -8.56875459  | -24.82526524 | 0.00000000 |
| C | -8.56874223  | 24.82528163  | 0.00000000 |
| C | -8.58565239  | 26.27723394  | 0.00000000 |
| C | -7.36402823  | -26.96578445 | 0.00000000 |
| C | -7.33599653  | -24.16128576 | 0.00000000 |
| C | -7.33598495  | 24.16130225  | 0.00000000 |
| C | -7.36401575  | 26.96579962  | 0.00000000 |
| C | -6.13424849  | -26.30272531 | 0.00000000 |
| C | -6.12219206  | -24.84869148 | 0.00000000 |
| C | -6.12218090  | 24.84870716  | 0.00000000 |
| C | -6.13423701  | 26.30274027  | 0.00000000 |
| C | -4.90873887  | -26.98618197 | 0.00000000 |
| C | -4.89014171  | -24.18155339 | 0.00000000 |
| C | -4.89013135  | 24.18156938  | 0.00000000 |
| C | -4.90872807  | 26.98619664  | 0.00000000 |
| C | -3.68109258  | -26.31949832 | 0.00000000 |
| C | -3.67387632  | -24.86439038 | 0.00000000 |
| C | -3.67386678  | 24.86440572  | 0.00000000 |
| C | -3.68108289  | 26.31951294  | 0.00000000 |
| C | -2.45424208  | -26.99818176 | 0.00000000 |

|   |             |              |            |
|---|-------------|--------------|------------|
| C | -2.44496719 | -24.19386998 | 0.00000000 |
| C | -2.44495862 | 24.19388576  | 0.00000000 |
| C | -2.45423334 | 26.99819625  | 0.00000000 |
| C | -1.22710849 | -26.32777438 | 0.00000000 |
| C | -1.22470618 | -24.87233075 | 0.00000000 |
| C | -1.22469871 | 24.87234601  | 0.00000000 |
| C | -1.22710096 | 26.32778884  | 0.00000000 |
| C | -0.00000553 | -27.00214369 | 0.00000000 |
| C | -0.00000590 | -24.19800284 | 0.00000000 |
| C | 0.00000040  | 24.19801860  | 0.00000000 |
| C | 0.00000082  | 27.00215807  | 0.00000000 |
| C | 1.22709739  | -26.32777406 | 0.00000000 |
| C | 1.22469470  | -24.87233043 | 0.00000000 |
| C | 1.22469980  | 24.87234568  | 0.00000000 |
| C | 1.22710250  | 26.32778846  | 0.00000000 |
| C | 2.45423137  | -26.99818113 | 0.00000000 |
| C | 2.44495578  | -24.19386935 | 0.00000000 |
| C | 2.44495962  | 24.19388515  | 0.00000000 |
| C | 2.45423516  | 26.99819545  | 0.00000000 |
| C | 3.68108213  | -26.31949741 | 0.00000000 |
| C | 3.67386553  | -24.86438942 | 0.00000000 |
| C | 3.67386823  | 24.86440472  | 0.00000000 |
| C | 3.68108476  | 26.31951183  | 0.00000000 |
| C | 4.90872911  | -26.98618075 | 0.00000000 |
| C | 4.89013132  | -24.18155218 | 0.00000000 |
| C | 4.89013290  | 24.18156814  | 0.00000000 |
| C | 4.90873036  | 26.98619509  | 0.00000000 |
| C | 6.13423918  | -26.30272385 | 0.00000000 |
| C | 6.12218247  | -24.84868998 | 0.00000000 |
| C | 6.12218294  | 24.84870553  | 0.00000000 |
| C | 6.13423943  | 26.30273848  | 0.00000000 |
| C | 7.36401973  | -26.96578275 | 0.00000000 |
| C | 7.33598754  | -24.16128402 | 0.00000000 |
| C | 7.33598719  | 24.16130043  | 0.00000000 |
| C | 7.36401865  | 26.96579743  | 0.00000000 |
| C | 8.58565728  | -26.27721638 | 0.00000000 |
| C | 8.56874640  | -24.82526327 | 0.00000000 |
| C | 8.56874493  | 24.82527943  | 0.00000000 |
| C | 8.58565540  | 26.27723156  | 0.00000000 |
| C | 9.82125974  | -26.93644264 | 0.00000000 |
| C | 9.78331818  | -24.13254718 | 0.00000000 |
| C | 9.78331624  | 24.13256432  | 0.00000000 |
| C | 9.82125681  | 26.93645803  | 0.00000000 |
| C | 11.03209003 | -26.23948149 | 0.00000000 |
| C | 11.01157518 | -24.79445125 | 0.00000000 |
| C | 11.01157227 | 24.79446826  | 0.00000000 |
| C | 11.03208660 | 26.23949756  | 0.00000000 |
| C | 12.28452359 | -26.88020779 | 0.00000000 |
| C | 12.23160092 | -24.09396296 | 0.00000000 |
| C | 12.23159795 | 24.09398079  | 0.00000000 |
| C | 12.28451954 | 26.88022399  | 0.00000000 |
| C | 13.47780337 | -26.17433778 | 0.00000000 |
| C | 13.45925783 | -24.73119353 | 0.00000000 |
| C | 13.45925431 | 24.73121139  | 0.00000000 |
| C | 13.47779955 | 26.17435507  | 0.00000000 |
| C | 14.73256150 | -26.85533801 | 0.00000000 |
| C | 14.71721034 | -24.00796904 | 0.00000000 |
| C | 14.78427324 | -22.62630095 | 0.00000000 |
| C | 14.78427048 | 22.62631889  | 0.00000000 |
| C | 14.71720703 | 24.00798710  | 0.00000000 |
| C | 14.73255682 | 26.85535611  | 0.00000000 |
| C | 15.91154854 | -26.17754857 | 0.00000000 |
| C | 15.95468787 | -24.75049671 | 0.00000000 |
| C | 16.00373884 | -21.92479281 | 0.00000000 |
| C | 16.05003952 | -20.53030083 | 0.00000000 |
| C | 16.05003738 | 20.53031759  | 0.00000000 |
| C | 16.00373603 | 21.92480993  | 0.00000000 |
| C | 15.95468397 | 24.75051508  | 0.00000000 |
| C | 15.91154458 | 26.17756676  | 0.00000000 |
| C | 17.16527457 | -24.07471347 | 0.00000000 |
| C | 17.24186964 | -22.66996032 | 0.00000000 |
| C | 17.25994636 | -19.82953348 | 0.00000000 |
| C | 17.30643570 | -18.43014329 | 0.00000000 |
| C | 17.30643397 | 18.43015759  | 0.00000000 |
| C | 17.25994409 | 19.82954857  | 0.00000000 |
| C | 17.24186646 | 22.66997695  | 0.00000000 |
| C | 17.16527079 | 24.07473074  | 0.00000000 |
| C | 18.45359948 | -21.97444136 | 0.00000000 |
| C | 18.50593273 | -20.57488602 | 0.00000000 |
| C | 18.51122754 | -17.72720840 | 0.00000000 |
| C | 18.55417002 | -16.32686365 | 0.00000000 |
| C | 18.55416896 | 16.32687394  | 0.00000000 |
| C | 18.51122579 | 17.72722011  | 0.00000000 |

|   |              |              |            |
|---|--------------|--------------|------------|
| C | 18.50593016  | 20.57490017  | 0.00000000 |
| C | 18.45359638  | 21.97445664  | 0.00000000 |
| C | 19.71577006  | -19.86558731 | 0.00000000 |
| C | 19.76165038  | -18.46906783 | 0.00000000 |
| C | 19.75598897  | -15.61914692 | 0.00000000 |
| C | 19.79378832  | -14.21982748 | 0.00000000 |
| C | 19.79378843  | 14.21983227  | 0.00000000 |
| C | 19.75598812  | 15.61915378  | 0.00000000 |
| C | 19.76164838  | 18.46907831  | 0.00000000 |
| C | 19.71576743  | 19.86559931  | 0.00000000 |
| C | 20.96880758  | -17.75341156 | 0.00000000 |
| C | 21.01006453  | -16.35684783 | 0.00000000 |
| C | 20.99347967  | -13.50594399 | 0.00000000 |
| C | 21.02509353  | -12.10835229 | 0.00000000 |
| C | 21.02509521  | 12.10835059  | 0.00000000 |
| C | 20.99348018  | 13.50594477  | 0.00000000 |
| C | 21.01006350  | 16.35685335  | 0.00000000 |
| C | 20.96880561  | 17.75341909  | 0.00000000 |
| C | 22.21345822  | -15.63704794 | 0.00000000 |
| C | 22.25063901  | -14.23899172 | 0.00000000 |
| C | 22.22301402  | -11.38791133 | 0.00000000 |
| C | 22.24794047  | -9.99208105  | 0.00000000 |
| C | 22.24794364  | 9.99207276   | 0.00000000 |
| C | 22.22301612  | 11.38790552  | 0.00000000 |
| C | 22.25063941  | 14.23899117  | 0.00000000 |
| C | 22.21345746  | 15.63704979  | 0.00000000 |
| C | 23.45003525  | -13.51610799 | 0.00000000 |
| C | 23.48302722  | -12.11602847 | 0.00000000 |
| C | 23.44419721  | -9.26534325  | 0.00000000 |
| C | 23.46237789  | -7.87077012  | 0.00000000 |
| C | 23.46238201  | 7.87075597   | 0.00000000 |
| C | 23.44420065  | 9.26533121   | 0.00000000 |
| C | 23.48302926  | 12.11602132  | 0.00000000 |
| C | 23.45003612  | 13.51610331  | 0.00000000 |
| C | 24.67855320  | -11.39034789 | 0.00000000 |
| C | 24.70682409  | -9.98826889  | 0.00000000 |
| C | 24.65676408  | -7.13879936  | 0.00000000 |
| C | 24.66876625  | -5.74406213  | 0.00000000 |
| C | 24.66877043  | 5.74404333   | 0.00000000 |
| C | 24.65676816  | 7.13878212   | 0.00000000 |
| C | 24.70682750  | 9.98825551   | 0.00000000 |
| C | 24.67855571  | 11.39033664  | 0.00000000 |
| C | 25.89888015  | -9.25944283  | 0.00000000 |
| C | 25.92140403  | -7.85608972  | 0.00000000 |
| C | 25.86023981  | -5.00903845  | 0.00000000 |
| C | 25.86706060  | -3.61097692  | 0.00000000 |
| C | 25.86706386  | 3.61095475   | 0.00000000 |
| C | 25.86024366  | 5.00901722   | 0.00000000 |
| C | 25.92140819  | 7.85607114   | 0.00000000 |
| C | 25.89888386  | 9.25942580   | 0.00000000 |
| C | 27.11086091  | -7.12274417  | 0.00000000 |
| C | 27.12603875  | -5.72016202  | 0.00000000 |
| C | 27.05396929  | -2.87795463  | 0.00000000 |
| C | 27.05564544  | -1.47127485  | 0.00000000 |
| C | 27.05564690  | 1.47125021   | 0.00000000 |
| C | 27.05397197  | 2.87793043   | 0.00000000 |
| C | 27.12604287  | 5.72013948   | 0.00000000 |
| C | 27.11086510  | 7.12272264   | 0.00000000 |
| C | 28.31456554  | -4.97901510  | 0.00000000 |
| C | 28.31608945  | -3.58160059  | 0.00000000 |
| C | 28.22034915  | -0.72550378  | 0.00000000 |
| C | 28.22034993  | 0.72547766   | 0.00000000 |
| C | 28.31609270  | 3.58157511   | 0.00000000 |
| C | 28.31456937  | 4.97899024   | 0.00000000 |
| C | 29.49638517  | -2.81568931  | 0.00000000 |
| C | 29.48014486  | -1.42910963  | 0.00000000 |
| C | 29.48014651  | 1.42908204   | 0.00000000 |
| C | 29.49638783  | 2.81566209   | 0.00000000 |
| C | 30.69565688  | -0.68009836  | 0.00000000 |
| C | 30.69565759  | 0.68006927   | 0.00000000 |
| H | -31.64174736 | -1.23887227  | 0.00000000 |
| H | -31.64174899 | 1.23882450   | 0.00000000 |
| H | -30.46581749 | -3.33600910  | 0.00000000 |
| H | -30.46582100 | 3.33596376   | 0.00000000 |
| H | -29.27563773 | -5.51435321  | 0.00000000 |
| H | -29.27564221 | 5.51431076   | 0.00000000 |
| H | -28.06892067 | -7.66351529  | 0.00000000 |
| H | -28.06892491 | 7.66347727   | 0.00000000 |
| H | -26.85467133 | -9.80427230  | 0.00000000 |
| H | -26.85467416 | 9.80424048   | 0.00000000 |
| H | -26.07734679 | -0.97086131  | 0.00000000 |
| H | -26.07734819 | 0.97082049   | 0.00000000 |
| H | -25.63212855 | -11.93909212 | 0.00000000 |

|   |              |              |            |
|---|--------------|--------------|------------|
| H | -25.63212893 | 11.93906834  | 0.00000000 |
| H | -24.90685321 | -3.07387466  | 0.00000000 |
| H | -24.90685624 | 3.07383705   | 0.00000000 |
| H | -24.40143853 | -14.06862734 | 0.00000000 |
| H | -24.40143583 | 14.06861271  | 0.00000000 |
| H | -23.71098860 | -5.20286667  | 0.00000000 |
| H | -23.71099229 | 5.20283342   | 0.00000000 |
| H | -23.16270329 | -16.19324877 | 0.00000000 |
| H | -23.16269748 | 16.19324329  | 0.00000000 |
| H | -22.50673499 | -7.32578029  | 0.00000000 |
| H | -22.50673792 | 7.32575338   | 0.00000000 |
| H | -21.91588495 | -18.31324994 | 0.00000000 |
| H | -21.91587661 | 18.31325256  | 0.00000000 |
| H | -21.29441823 | -9.44334801  | 0.00000000 |
| H | -21.29441912 | 9.44332925   | 0.00000000 |
| H | -20.66067315 | -20.42902918 | 0.00000000 |
| H | -20.66066308 | 20.42903831  | 0.00000000 |
| H | -20.07371585 | -11.55589233 | 0.00000000 |
| H | -20.07371387 | 11.55588278  | 0.00000000 |
| H | -19.39559443 | -22.54267471 | 0.00000000 |
| H | -19.39558311 | 22.54268875  | 0.00000000 |
| H | -18.84453933 | -13.66373470 | 0.00000000 |
| H | -18.84453441 | 13.66373424  | 0.00000000 |
| H | -18.09909964 | -24.65655699 | 0.00000000 |
| H | -18.09908752 | 24.65657380  | 0.00000000 |
| H | -17.60698492 | -15.76730251 | 0.00000000 |
| H | -17.60697760 | 15.76730980  | 0.00000000 |
| H | -16.86765628 | -26.71897031 | 0.00000000 |
| H | -16.86764340 | 26.71898866  | 0.00000000 |
| H | -16.36126148 | -17.86722286 | 0.00000000 |
| H | -16.36125257 | 17.86723586  | 0.00000000 |
| H | -15.10693345 | -19.96373033 | 0.00000000 |
| H | -15.10692358 | 19.96374686  | 0.00000000 |
| H | -14.71921322 | -27.95400755 | 0.00000000 |
| H | -14.71919784 | 27.95402615  | 0.00000000 |
| H | -13.86326938 | -22.02688008 | 0.00000000 |
| H | -13.86325844 | 22.02689881  | 0.00000000 |
| H | -12.31732824 | -27.97995551 | 0.00000000 |
| H | -12.17721640 | -22.99646657 | 0.00000000 |
| H | -12.17720450 | 22.99648562  | 0.00000000 |
| H | -12.31731326 | 27.97997217  | 0.00000000 |
| H | -9.83803949  | -28.03640317 | 0.00000000 |
| H | -9.76848841  | -23.03245660 | 0.00000000 |
| H | -9.76847657  | 23.03247485  | 0.00000000 |
| H | -9.83802532  | 28.03641867  | 0.00000000 |
| H | -7.37534456  | -28.06583964 | 0.00000000 |
| H | -7.32523751  | -23.06124566 | 0.00000000 |
| H | -7.32522622  | 23.06126310  | 0.00000000 |
| H | -7.37533162  | 28.06585426  | 0.00000000 |
| H | -4.91617602  | -28.08629828 | 0.00000000 |
| H | -4.88296501  | -23.08146889 | 0.00000000 |
| H | -4.88295475  | 23.08148584  | 0.00000000 |
| H | -4.91616495  | 28.08631245  | 0.00000000 |
| H | -2.45792006  | -28.09833936 | 0.00000000 |
| H | -2.44134930  | -23.09374795 | 0.00000000 |
| H | -2.44134076  | 23.09376472  | 0.00000000 |
| H | -2.45791123  | 28.09835338  | 0.00000000 |
| H | -0.00000549  | -28.10231626 | 0.00000000 |
| H | -0.00000615  | -23.09786645 | 0.00000000 |
| H | 0.00000010   | 23.09788322  | 0.00000000 |
| H | 0.00000082   | 28.10233018  | 0.00000000 |
| H | 2.45790947   | -28.09833867 | 0.00000000 |
| H | 2.44133745   | -23.09374737 | 0.00000000 |
| H | 2.44134121   | 23.09376423  | 0.00000000 |
| H | 2.45791313   | 28.09835246  | 0.00000000 |
| H | 4.91616643   | -28.08629697 | 0.00000000 |
| H | 4.88295432   | -23.08146776 | 0.00000000 |
| H | 4.88295588   | 23.08148484  | 0.00000000 |
| H | 4.91616741   | 28.08631069  | 0.00000000 |
| H | 7.37533627   | -28.06583783 | 0.00000000 |
| H | 7.32522835   | -23.06124401 | 0.00000000 |
| H | 7.32522820   | 23.06126157  | 0.00000000 |
| H | 7.37533476   | 28.06585181  | 0.00000000 |
| H | 9.83803251   | -28.03640102 | 0.00000000 |
| H | 9.76848075   | -23.03245453 | 0.00000000 |
| H | 9.76847923   | 23.03247279  | 0.00000000 |
| H | 9.83802909   | 28.03641565  | 0.00000000 |
| H | 12.31732225  | -27.97995318 | 0.00000000 |
| H | 12.17720993  | -22.99646417 | 0.00000000 |
| H | 12.17720751  | 22.99648305  | 0.00000000 |
| H | 12.31731728  | 27.97996864  | 0.00000000 |
| H | 13.86326515  | -22.02687619 | 0.00000000 |
| H | 13.86326308  | 22.02689522  | 0.00000000 |

|   |             |              |            |
|---|-------------|--------------|------------|
| H | 14.71920798 | -27.95400521 | 0.00000000 |
| H | 14.71920163 | 27.95402249  | 0.00000000 |
| H | 15.10692988 | -19.96372527 | 0.00000000 |
| H | 15.10692853 | 19.96374335  | 0.00000000 |
| H | 16.36125890 | -17.86721624 | 0.00000000 |
| H | 16.36125787 | 17.86723237  | 0.00000000 |
| H | 16.86765185 | -26.71896740 | 0.00000000 |
| H | 16.86764743 | 26.71898463  | 0.00000000 |
| H | 17.60698348 | -15.76729416 | 0.00000000 |
| H | 17.60698320 | 15.76730645  | 0.00000000 |
| H | 18.09909558 | -24.65655334 | 0.00000000 |
| H | 18.09909108 | 24.65656991  | 0.00000000 |
| H | 18.84453897 | -13.66372477 | 0.00000000 |
| H | 18.84454003 | 13.66373144  | 0.00000000 |
| H | 19.39559106 | -22.54267004 | 0.00000000 |
| H | 19.39558672 | 22.54268498  | 0.00000000 |
| H | 20.07371633 | -11.55588127 | 0.00000000 |
| H | 20.07371914 | 11.55588111  | 0.00000000 |
| H | 20.66067084 | -20.42902317 | 0.00000000 |
| H | 20.66066686 | 20.42903453  | 0.00000000 |
| H | 21.29441923 | -9.44333648  | 0.00000000 |
| H | 21.29442364 | 9.44332926   | 0.00000000 |
| H | 21.91588391 | -18.31324249 | 0.00000000 |
| H | 21.91588053 | 18.31324906  | 0.00000000 |
| H | 22.50673617 | -7.32576892  | 0.00000000 |
| H | 22.50674144 | 7.32575544   | 0.00000000 |
| H | 23.16270357 | -16.19323998 | 0.00000000 |
| H | 23.16270148 | 16.19324047  | 0.00000000 |
| H | 23.71098974 | -5.20285587  | 0.00000000 |
| H | 23.71099478 | 5.20283752   | 0.00000000 |
| H | 24.40143992 | -14.06861758 | 0.00000000 |
| H | 24.40143968 | 14.06861116  | 0.00000000 |
| H | 24.90685426 | -3.07386455  | 0.00000000 |
| H | 24.90685789 | 3.07384285   | 0.00000000 |
| H | 25.63213065 | -11.93908192 | 0.00000000 |
| H | 25.63213237 | 11.93906862  | 0.00000000 |
| H | 26.07734781 | -0.97085179  | 0.00000000 |
| H | 26.07734936 | 0.97082735   | 0.00000000 |
| H | 26.85467371 | -9.80426213  | 0.00000000 |
| H | 26.85467699 | 9.80424290   | 0.00000000 |
| H | 28.06892296 | -7.66350545  | 0.00000000 |
| H | 28.06892705 | 7.66348179   | 0.00000000 |
| H | 29.27563970 | -5.51434385  | 0.00000000 |
| H | 29.27564373 | 5.51431706   | 0.00000000 |
| H | 30.46581916 | -3.33600007  | 0.00000000 |
| H | 30.46582218 | 3.33597130   | 0.00000000 |
| H | 31.64174858 | -1.23886321  | 0.00000000 |
| H | 31.64175001 | 1.23883259   | 0.00000000 |

## 14-HGQR (triplet)

|   |              |              |            |
|---|--------------|--------------|------------|
| C | -33.15994342 | -0.67991698  | 0.00000000 |
| C | -33.15994303 | 0.68016623   | 0.00000000 |
| C | -31.96096519 | -2.81526986  | 0.00000000 |
| C | -31.94437816 | -1.42884071  | 0.00000000 |
| C | -31.94437786 | 1.42908938   | 0.00000000 |
| C | -31.96096459 | 2.81551636   | 0.00000000 |
| C | -30.78008617 | -4.97869134  | 0.00000000 |
| C | -30.78082432 | -3.58146649  | 0.00000000 |
| C | -30.68436059 | -0.72543577  | 0.00000000 |
| C | -30.68436061 | 0.72568536   | 0.00000000 |
| C | -30.78082543 | 3.58171105   | 0.00000000 |
| C | -30.78008810 | 4.97893149   | 0.00000000 |
| C | -29.57782565 | -7.12285185  | 0.00000000 |
| C | -29.59187436 | -5.72044632  | 0.00000000 |
| C | -29.51839443 | -2.87828090  | 0.00000000 |
| C | -29.51983281 | -1.47143497  | 0.00000000 |
| C | -29.51983423 | 1.47168342   | 0.00000000 |
| C | -29.51839754 | 2.87852707   | 0.00000000 |
| C | -29.59187957 | 5.72068218   | 0.00000000 |
| C | -29.57783199 | 7.12308073   | 0.00000000 |
| C | -28.36772239 | -9.26030423  | 0.00000000 |
| C | -28.38883339 | -7.85701127  | 0.00000000 |
| C | -28.32563258 | -5.01007537  | 0.00000000 |
| C | -28.33185169 | -3.61181306  | 0.00000000 |
| C | -28.33185856 | 3.61205653   | 0.00000000 |
| C | -28.32564158 | 5.01031351   | 0.00000000 |
| C | -28.38884484 | 7.85723288   | 0.00000000 |
| C | -28.36773541 | 9.26051592   | 0.00000000 |
| C | -27.14966898 | -11.39231319 | 0.00000000 |
| C | -27.17635053 | -9.99002197  | 0.00000000 |
| C | -27.12364996 | -7.14079381  | 0.00000000 |
| C | -27.13468090 | -5.74587774  | 0.00000000 |
| C | -27.13469543 | 5.74611070   | 0.00000000 |
| C | -27.12366718 | 7.14101813   | 0.00000000 |

|   |              |              |            |
|---|--------------|--------------|------------|
| C | -27.17637066 | 9.99022348   | 0.00000000 |
| C | -27.14969127 | 11.39250181  | 0.00000000 |
| C | -25.92380869 | -13.51952097 | 0.00000000 |
| C | -25.95516966 | -12.11881516 | 0.00000000 |
| C | -25.91311220 | -9.26850775  | 0.00000000 |
| C | -25.92987686 | -7.87389643  | 0.00000000 |
| C | -25.92990150 | 7.87411295   | 0.00000000 |
| C | -25.91314004 | 9.26871240   | 0.00000000 |
| C | -25.95520092 | 12.11899107  | 0.00000000 |
| C | -25.92384284 | 13.51968134  | 0.00000000 |
| C | -24.69034340 | -15.64218063 | 0.00000000 |
| C | -24.72592019 | -14.24311571 | 0.00000000 |
| C | -24.69447506 | -11.39244446 | 0.00000000 |
| C | -24.71747450 | -9.99689058  | 0.00000000 |
| C | -24.71751148 | 9.99708458   | 0.00000000 |
| C | -24.69451567 | 11.39262385  | 0.00000000 |
| C | -24.72596483 | 14.24326161  | 0.00000000 |
| C | -24.69039173 | 15.64230905  | 0.00000000 |
| C | -23.44945390 | -17.76037162 | 0.00000000 |
| C | -23.48896404 | -16.36285622 | 0.00000000 |
| C | -23.46790840 | -13.51208585 | 0.00000000 |
| C | -23.49711573 | -12.11522012 | 0.00000000 |
| C | -23.49716683 | 12.11538629  | 0.00000000 |
| C | -23.46796348 | 13.51223548  | 0.00000000 |
| C | -23.48902395 | 16.36296940  | 0.00000000 |
| C | -23.44951828 | 17.76046632  | 0.00000000 |
| C | -22.20115405 | -19.87424632 | 0.00000000 |
| C | -22.24451845 | -18.47788935 | 0.00000000 |
| C | -22.23360127 | -15.62728229 | 0.00000000 |
| C | -22.26876715 | -14.22902647 | 0.00000000 |
| C | -22.26883355 | 14.22916106  | 0.00000000 |
| C | -22.23367198 | 15.62739944  | 0.00000000 |
| C | -22.24459497 | 18.47796919  | 0.00000000 |
| C | -22.20123570 | 19.87430793  | 0.00000000 |
| C | -20.94514046 | -21.98420310 | 0.00000000 |
| C | -20.99284039 | -20.58773653 | 0.00000000 |
| C | -20.99192766 | -17.73799324 | 0.00000000 |
| C | -21.03259942 | -16.33840358 | 0.00000000 |
| C | -21.03268170 | 16.33850490  | 0.00000000 |
| C | -20.99201455 | 17.73807733  | 0.00000000 |
| C | -20.99293404 | 20.58778481  | 0.00000000 |
| C | -20.94523951 | 21.98423509  | 0.00000000 |
| C | -19.68065925 | -24.09115475 | 0.00000000 |
| C | -19.73444997 | -22.69162374 | 0.00000000 |
| C | -19.74358580 | -19.84401241 | 0.00000000 |
| C | -19.78884087 | -18.44364634 | 0.00000000 |
| C | -19.78893892 | 18.44371510  | 0.00000000 |
| C | -19.74368864 | 19.84406522  | 0.00000000 |
| C | -19.73455997 | 22.69164474  | 0.00000000 |
| C | -19.68077364 | 24.09116297  | 0.00000000 |
| C | -18.39074561 | -26.18989015 | 0.00000000 |
| C | -18.46832235 | -24.78518841 | 0.00000000 |
| C | -18.48934752 | -21.94475447 | 0.00000000 |
| C | -18.53768513 | -20.54543690 | 0.00000000 |
| C | -18.53779796 | 20.54547630  | 0.00000000 |
| C | -18.48946504 | 21.94477997  | 0.00000000 |
| C | -18.46844558 | 24.78518759  | 0.00000000 |
| C | -18.39087123 | 26.18988023  | 0.00000000 |
| C | -17.13625551 | -28.29174242 | 0.00000000 |
| C | -17.17981248 | -26.86471380 | 0.00000000 |
| C | -17.23083119 | -24.03886297 | 0.00000000 |
| C | -17.27855352 | -22.64443782 | 0.00000000 |
| C | -17.27867929 | 22.64445293  | 0.00000000 |
| C | -17.23096048 | 24.03886620  | 0.00000000 |
| C | -17.17994623 | 26.86469830  | 0.00000000 |
| C | -17.13639298 | 28.29172130  | 0.00000000 |
| C | -15.95708171 | -28.96900269 | 0.00000000 |
| C | -15.94273452 | -26.12130769 | 0.00000000 |
| C | -16.01075064 | -24.73968855 | 0.00000000 |
| C | -16.01088590 | 24.73968383  | 0.00000000 |
| C | -15.94287422 | 26.12129321  | 0.00000000 |
| C | -15.95722641 | 28.96897952  | 0.00000000 |
| C | -14.70268458 | -28.28735753 | 0.00000000 |
| C | -14.68434836 | -26.84410147 | 0.00000000 |
| C | -14.68449341 | 26.84408534  | 0.00000000 |
| C | -14.70283379 | 28.28733673  | 0.00000000 |
| C | -13.50948928 | -28.99304032 | 0.00000000 |
| C | -13.45677109 | -26.20672431 | 0.00000000 |
| C | -13.45692312 | 26.20671086  | 0.00000000 |
| C | -13.50964552 | 28.99301927  | 0.00000000 |
| C | -12.25712562 | -28.35217294 | 0.00000000 |
| C | -12.23646098 | -26.90709872 | 0.00000000 |
| C | -12.23661984 | 26.90708535  | 0.00000000 |

|   |              |              |            |
|---|--------------|--------------|------------|
| C | -12.25728578 | 28.35215547  | 0.00000000 |
| C | -11.04671115 | -29.04942108 | 0.00000000 |
| C | -11.00808274 | -26.24546429 | 0.00000000 |
| C | -11.00824663 | 26.24545351  | 0.00000000 |
| C | -11.04687746 | 29.04940427  | 0.00000000 |
| C | -9.81093147  | -28.39046730 | 0.00000000 |
| C | -9.79344468  | -26.93850604 | 0.00000000 |
| C | -9.79361387  | 26.93849488  | 0.00000000 |
| C | -9.81110162  | 28.39045306  | 0.00000000 |
| C | -8.58993505  | -29.07972263 | 0.00000000 |
| C | -8.56035569  | -26.27516653 | 0.00000000 |
| C | -8.56052844  | 26.27515685  | 0.00000000 |
| C | -8.59010974  | 29.07970869  | 0.00000000 |
| C | -7.35982521  | -28.41727037 | 0.00000000 |
| C | -7.34674878  | -26.96330542 | 0.00000000 |
| C | -7.34692521  | 26.96329544  | 0.00000000 |
| C | -7.36000266  | 28.41725848  | 0.00000000 |
| C | -6.13506322  | -29.10182371 | 0.00000000 |
| C | -6.11405147  | -26.29716849 | 0.00000000 |
| C | -6.11422977  | 26.29715944  | 0.00000000 |
| C | -6.13524331  | 29.10181253  | 0.00000000 |
| C | -4.90707838  | -28.43608166 | 0.00000000 |
| C | -4.89838991  | -26.98115615 | 0.00000000 |
| C | -4.89856991  | 26.98114691  | 0.00000000 |
| C | -4.90725926  | 28.43607191  | 0.00000000 |
| C | -3.68089850  | -29.11626266 | 0.00000000 |
| C | -3.66833207  | -26.31201198 | 0.00000000 |
| C | -3.66851206  | 26.31200317  | 0.00000000 |
| C | -3.68107982  | 29.11625406  | 0.00000000 |
| C | -2.45360309  | -28.44717091 | 0.00000000 |
| C | -2.44926749  | -26.99201866 | 0.00000000 |
| C | -2.44944706  | 26.99200983  | 0.00000000 |
| C | -2.45378318  | 28.44716292  | 0.00000000 |
| C | -1.22690877  | -29.12340310 | 0.00000000 |
| C | -1.22272569  | -26.31948436 | 0.00000000 |
| C | -1.22290355  | 26.31947544  | 0.00000000 |
| C | -1.22708724  | 29.12339633  | 0.00000000 |
| C | 0.00008103   | -28.45083189 | 0.00000000 |
| C | 0.00008197   | -26.99566755 | 0.00000000 |
| C | -0.00009382  | 26.99565884  | 0.00000000 |
| C | -0.00009486  | 28.45082491  | 0.00000000 |
| C | 1.22706986   | -29.12340439 | 0.00000000 |
| C | 1.22289028   | -26.31948606 | 0.00000000 |
| C | 1.22271716   | 26.31947692  | 0.00000000 |
| C | 1.22689681   | 29.12339838  | 0.00000000 |
| C | 2.45376461   | -28.44717363 | 0.00000000 |
| C | 2.44943083   | -26.99202184 | 0.00000000 |
| C | 2.44926047   | 26.99201305  | 0.00000000 |
| C | 2.45359448   | 28.44716682  | 0.00000000 |
| C | 3.68105853   | -29.11626646 | 0.00000000 |
| C | 3.66849540   | -26.31201701 | 0.00000000 |
| C | 3.66832781   | 26.31200765  | 0.00000000 |
| C | 3.68089142   | 29.11626024  | 0.00000000 |
| C | 4.90723821   | -28.43608692 | 0.00000000 |
| C | 4.89855141   | -26.98116234 | 0.00000000 |
| C | 4.89838645   | 26.98115346  | 0.00000000 |
| C | 4.90707362   | 28.43607978  | 0.00000000 |
| C | 6.13522103   | -29.10182973 | 0.00000000 |
| C | 6.11421218   | -26.29717661 | 0.00000000 |
| C | 6.11404973   | 26.29716709  | 0.00000000 |
| C | 6.13505892   | 29.10182293  | 0.00000000 |
| C | 7.35998206   | -28.41727780 | 0.00000000 |
| C | 7.34690706   | -26.96331429 | 0.00000000 |
| C | 7.34674687   | 26.96330553  | 0.00000000 |
| C | 7.35982200   | 28.41727049  | 0.00000000 |
| C | 8.59008936   | -29.07973041 | 0.00000000 |
| C | 8.56051227   | -26.27517732 | 0.00000000 |
| C | 8.56035458   | 26.27516798  | 0.00000000 |
| C | 8.58993112   | 29.07972351  | 0.00000000 |
| C | 9.81108393   | -28.39047631 | 0.00000000 |
| C | 9.79359816   | -26.93851704 | 0.00000000 |
| C | 9.79344255   | 26.93850890  | 0.00000000 |
| C | 9.81092772   | 28.39046957  | 0.00000000 |
| C | 11.04686072  | -29.04942976 | 0.00000000 |
| C | 11.00823359  | -26.24547711 | 0.00000000 |
| C | 11.00808073  | 26.24546860  | 0.00000000 |
| C | 11.04670605  | 29.04942414  | 0.00000000 |
| C | 12.25727208  | -28.35218231 | 0.00000000 |
| C | 12.23660792  | -26.90711087 | 0.00000000 |
| C | 12.23645743  | 26.90710410  | 0.00000000 |
| C | 12.25712039  | 28.35217748  | 0.00000000 |
| C | 13.50963270  | -28.99304810 | 0.00000000 |
| C | 13.45691411  | -26.20673781 | 0.00000000 |

|   |             |              |            |
|---|-------------|--------------|------------|
| C | 13.45676735 | 26.20673104  | 0.00000000 |
| C | 13.50948285 | 28.99304587  | 0.00000000 |
| C | 14.70282369 | -28.28736649 | 0.00000000 |
| C | 14.68448585 | -26.84411398 | 0.00000000 |
| C | 14.68434300 | 26.84410916  | 0.00000000 |
| C | 14.70267837 | 28.28736462  | 0.00000000 |
| C | 15.95721675 | -28.96901092 | 0.00000000 |
| C | 15.94286853 | -26.12132252 | 0.00000000 |
| C | 16.01088256 | -24.73971112 | 0.00000000 |
| C | 16.01074534 | 24.73969805  | 0.00000000 |
| C | 15.94272911 | 26.12131641  | 0.00000000 |
| C | 15.95707455 | 28.96901069  | 0.00000000 |
| C | 17.13638571 | -28.29175280 | 0.00000000 |
| C | 17.17994091 | -26.86472865 | 0.00000000 |
| C | 17.23095887 | -24.03889260 | 0.00000000 |
| C | 17.27867989 | -22.64447736 | 0.00000000 |
| C | 17.27854833 | 22.64444840  | 0.00000000 |
| C | 17.23082572 | 24.03887322  | 0.00000000 |
| C | 17.17980629 | 26.86472315  | 0.00000000 |
| C | 17.13624863 | 28.29175142  | 0.00000000 |
| C | 18.39086779 | -26.18990989 | 0.00000000 |
| C | 18.46844404 | -24.78521550 | 0.00000000 |
| C | 18.48946703 | -21.94480276 | 0.00000000 |
| C | 18.53780202 | -20.54549736 | 0.00000000 |
| C | 18.53768075 | 20.54544808  | 0.00000000 |
| C | 18.48934260 | 21.94476581  | 0.00000000 |
| C | 18.46831650 | 24.78519861  | 0.00000000 |
| C | 18.39073935 | 26.18990004  | 0.00000000 |
| C | 19.68077399 | -24.09118941 | 0.00000000 |
| C | 19.73456221 | -22.69166859 | 0.00000000 |
| C | 19.74369353 | -19.84408381 | 0.00000000 |
| C | 19.78894517 | -18.44373204 | 0.00000000 |
| C | 19.78883883 | 18.44365796  | 0.00000000 |
| C | 19.74358235 | 19.84402453  | 0.00000000 |
| C | 19.73444451 | 22.69163531  | 0.00000000 |
| C | 19.68065309 | 24.09116565  | 0.00000000 |
| C | 20.94524371 | -21.98425677 | 0.00000000 |
| C | 20.99293960 | -20.58780347 | 0.00000000 |
| C | 20.99202110 | -17.73809125 | 0.00000000 |
| C | 21.03268870 | -16.33851724 | 0.00000000 |
| C | 21.03260118 | 16.33841564  | 0.00000000 |
| C | 20.99192703 | 17.73800593  | 0.00000000 |
| C | 20.99283601 | 20.58774967  | 0.00000000 |
| C | 20.94513466 | 21.98421553  | 0.00000000 |
| C | 22.20124265 | -19.87432368 | 0.00000000 |
| C | 22.24460246 | -18.47798221 | 0.00000000 |
| C | 22.23367894 | -15.62740849 | 0.00000000 |
| C | 22.26884033 | -14.22916846 | 0.00000000 |
| C | 22.26877347 | 14.22903930  | 0.00000000 |
| C | 22.23360460 | 15.62729551  | 0.00000000 |
| C | 22.24451657 | 18.47790382  | 0.00000000 |
| C | 22.20114987 | 19.87426052  | 0.00000000 |
| C | 23.44952638 | -17.76047606 | 0.00000000 |
| C | 23.48903199 | -16.36297698 | 0.00000000 |
| C | 23.46797019 | -13.51223950 | 0.00000000 |
| C | 23.49717313 | -12.11538850 | 0.00000000 |
| C | 23.49712636 | 12.11523434  | 0.00000000 |
| C | 23.46791598 | 13.51209995  | 0.00000000 |
| C | 23.48896583 | 16.36287154  | 0.00000000 |
| C | 23.44945283 | 17.76038717  | 0.00000000 |
| C | 24.69039981 | -15.64231323 | 0.00000000 |
| C | 24.72597264 | -14.24326406 | 0.00000000 |
| C | 24.69452213 | -11.39262282 | 0.00000000 |
| C | 24.71751766 | -9.99708166  | 0.00000000 |
| C | 24.71748838 | 9.99690667   | 0.00000000 |
| C | 24.69448632 | 11.39245993  | 0.00000000 |
| C | 24.72592599 | 14.24313170  | 0.00000000 |
| C | 24.69034628 | 15.64219700  | 0.00000000 |
| C | 25.92385046 | -13.51968050 | 0.00000000 |
| C | 25.95520837 | -12.11898874 | 0.00000000 |
| C | 25.91314667 | -9.26870672  | 0.00000000 |
| C | 25.92990818 | -7.87410547  | 0.00000000 |
| C | 25.92989257 | 7.87391435   | 0.00000000 |
| C | 25.91312600 | 9.26852480   | 0.00000000 |
| C | 25.95517903 | 12.11883196  | 0.00000000 |
| C | 25.92381544 | 13.51953799  | 0.00000000 |
| C | 27.14969851 | -11.39249652 | 0.00000000 |
| C | 27.17637800 | -9.99021693  | 0.00000000 |
| C | 27.12367451 | -7.14100859  | 0.00000000 |
| C | 27.13470323 | -5.74609962  | 0.00000000 |
| C | 27.13469701 | 5.74589690   | 0.00000000 |
| C | 27.12366498 | 7.14081216   | 0.00000000 |
| C | 27.17636255 | 9.99003965   | 0.00000000 |

|   |              |              |            |
|---|--------------|--------------|------------|
| C | 27.14967892  | 11.39233088  | 0.00000000 |
| C | 28.36774261  | -9.26050697  | 0.00000000 |
| C | 28.38885250  | -7.85722295  | 0.00000000 |
| C | 28.32565012  | -5.01030112  | 0.00000000 |
| C | 28.33186796  | -3.61204296  | 0.00000000 |
| C | 28.33186697  | 3.61183254   | 0.00000000 |
| C | 28.32564760  | 5.01009433   | 0.00000000 |
| C | 28.38884701  | 7.85702952   | 0.00000000 |
| C | 28.36773464  | 9.26032240   | 0.00000000 |
| C | 29.57783963  | -7.12306907  | 0.00000000 |
| C | 29.59188802  | -5.72066984  | 0.00000000 |
| C | 29.51840762  | -2.87851275  | 0.00000000 |
| C | 29.51984523  | -1.47166845  | 0.00000000 |
| C | 29.51984612  | 1.47145358   | 0.00000000 |
| C | 29.51840842  | 2.87829937   | 0.00000000 |
| C | 29.59188850  | 5.72046448   | 0.00000000 |
| C | 29.57783920  | 7.12286996   | 0.00000000 |
| C | 30.78009661  | -4.97891801  | 0.00000000 |
| C | 30.78083493  | -3.58169714  | 0.00000000 |
| C | 30.68437192  | -0.72566956  | 0.00000000 |
| C | 30.68437271  | 0.72545227   | 0.00000000 |
| C | 30.78083794  | 3.58148375   | 0.00000000 |
| C | 30.78009997  | 4.97870863   | 0.00000000 |
| C | 31.96097407  | -2.81550184  | 0.00000000 |
| C | 31.94438844  | -1.42907446  | 0.00000000 |
| C | 31.94439060  | 1.42885620   | 0.00000000 |
| C | 31.96097808  | 2.81528568   | 0.00000000 |
| C | 33.15995406  | -0.68015222  | 0.00000000 |
| C | 33.15995535  | 0.67993174   | 0.00000000 |
| H | -34.10601033 | -1.23875218  | 0.00000000 |
| H | -34.10600980 | 1.23900064   | 0.00000000 |
| H | -32.93050652 | -3.33539648  | 0.00000000 |
| H | -32.93050532 | 3.33564124   | 0.00000000 |
| H | -31.74142953 | -5.51355350  | 0.00000000 |
| H | -31.74143006 | 5.51379113   | 0.00000000 |
| H | -30.53627067 | -7.66294820  | 0.00000000 |
| H | -30.53627437 | 7.66317430   | 0.00000000 |
| H | -29.32401843 | -9.80425656  | 0.00000000 |
| H | -29.32402748 | 9.80446526   | 0.00000000 |
| H | -28.54145388 | -0.97112410  | 0.00000000 |
| H | -28.54145663 | 0.97137100   | 0.00000000 |
| H | -28.10387501 | -11.93997478 | 0.00000000 |
| H | -28.10389202 | 11.94016035  | 0.00000000 |
| H | -27.37138065 | -3.07515413  | 0.00000000 |
| H | -27.37139008 | 3.07539721   | 0.00000000 |
| H | -26.87598191 | -14.07073904 | 0.00000000 |
| H | -26.87600968 | 14.07089638  | 0.00000000 |
| H | -26.17650663 | -5.20535577  | 0.00000000 |
| H | -26.17652514 | 5.20558890   | 0.00000000 |
| H | -25.64051613 | -16.19683905 | 0.00000000 |
| H | -25.64055735 | 16.19696442  | 0.00000000 |
| H | -24.97370708 | -7.32980099  | 0.00000000 |
| H | -24.97373696 | 7.33001828   | 0.00000000 |
| H | -24.39763084 | -18.31840371 | 0.00000000 |
| H | -24.39768786 | 18.31849536  | 0.00000000 |
| H | -23.76329613 | -9.44926300  | 0.00000000 |
| H | -23.76333938 | 9.44945835   | 0.00000000 |
| H | -23.14732189 | -20.43562647 | 0.00000000 |
| H | -23.14739638 | 20.43568519  | 0.00000000 |
| H | -22.54495888 | -11.56405563 | 0.00000000 |
| H | -22.54501690 | 11.56422371  | 0.00000000 |
| H | -21.88929330 | -22.54890527 | 0.00000000 |
| H | -21.88938579 | 22.54893489  | 0.00000000 |
| H | -21.31862952 | -13.67438780 | 0.00000000 |
| H | -21.31870306 | 13.67452479  | 0.00000000 |
| H | -20.62206304 | -24.66037310 | 0.00000000 |
| H | -20.62217154 | 24.66038016  | 0.00000000 |
| H | -20.08444244 | -15.78041369 | 0.00000000 |
| H | -20.08453159 | 15.78051786  | 0.00000000 |
| H | -19.32419418 | -26.77234085 | 0.00000000 |
| H | -19.32431530 | 26.77232995  | 0.00000000 |
| H | -18.84258331 | -17.88248567 | 0.00000000 |
| H | -18.84268749 | 17.88255772  | 0.00000000 |
| H | -18.09221234 | -28.83344797 | 0.00000000 |
| H | -18.09234749 | 28.83342396  | 0.00000000 |
| H | -17.59326596 | -19.98121888 | 0.00000000 |
| H | -17.59338380 | 19.98126196  | 0.00000000 |
| H | -16.33602294 | -22.07687865 | 0.00000000 |
| H | -16.33615266 | 22.07689737  | 0.00000000 |
| H | -15.94316257 | -30.06767651 | 0.00000000 |
| H | -15.94330725 | 30.06765065  | 0.00000000 |
| H | -15.09006639 | -24.13972145 | 0.00000000 |
| H | -15.09020348 | 24.13972148  | 0.00000000 |

|   |              |              |            |
|---|--------------|--------------|------------|
| H | -13.54211869 | -30.09279770 | 0.00000000 |
| H | -13.40263749 | -25.10918836 | 0.00000000 |
| H | -13.40278884 | 25.10917852  | 0.00000000 |
| H | -13.54227650 | 30.09277424  | 0.00000000 |
| H | -11.06375215 | -30.14938252 | 0.00000000 |
| H | -10.99299244 | -25.14536500 | 0.00000000 |
| H | -10.99315455 | 25.14535712  | 0.00000000 |
| H | -11.06391958 | 30.14936356  | 0.00000000 |
| H | -8.60184074  | -30.17977670 | 0.00000000 |
| H | -8.54898295  | -25.17512348 | 0.00000000 |
| H | -8.54915412  | 25.17511592  | 0.00000000 |
| H | -8.60201557  | 30.17976105  | 0.00000000 |
| H | -6.14342035  | -30.20193851 | 0.00000000 |
| H | -6.10590835  | -25.19708188 | 0.00000000 |
| H | -6.10608507  | 25.19707415  | 0.00000000 |
| H | -6.14360008  | 30.20192632  | 0.00000000 |
| H | -3.68584030  | -30.21642261 | 0.00000000 |
| H | -3.66339760  | -25.21188428 | 0.00000000 |
| H | -3.66357611  | 25.21187596  | 0.00000000 |
| H | -3.68602106  | 30.21641380  | 0.00000000 |
| H | -1.22854336  | -30.22358748 | 0.00000000 |
| H | -1.22107269  | -25.21933299 | 0.00000000 |
| H | -1.22124950  | 25.21932380  | 0.00000000 |
| H | -1.22872134  | 30.22358121  | 0.00000000 |
| H | 1.22870266   | -30.22358858 | 0.00000000 |
| H | 1.22123803   | -25.21933494 | 0.00000000 |
| H | 1.22106535   | 25.21932497  | 0.00000000 |
| H | 1.22852987   | 30.22358352  | 0.00000000 |
| H | 3.68599863   | -30.21642582 | 0.00000000 |
| H | 3.66356162   | -25.21189006 | 0.00000000 |
| H | 3.66339409   | 25.21187953  | 0.00000000 |
| H | 3.68583153   | 30.21642074  | 0.00000000 |
| H | 6.14357667   | -30.20194357 | 0.00000000 |
| H | 6.10606960   | -25.19709127 | 0.00000000 |
| H | 6.10590729   | 25.19708032  | 0.00000000 |
| H | 6.14341437   | 30.20193791  | 0.00000000 |
| H | 8.60199390   | -30.17978317 | 0.00000000 |
| H | 8.54913984   | -25.17513610 | 0.00000000 |
| H | 8.54898261   | 25.17512502  | 0.00000000 |
| H | 8.60183533   | 30.17977743  | 0.00000000 |
| H | 11.06390120  | -30.14938956 | 0.00000000 |
| H | 10.99314316  | -25.14538026 | 0.00000000 |
| H | 10.99299128  | 25.14536959  | 0.00000000 |
| H | 11.06374596  | 30.14938529  | 0.00000000 |
| H | 13.54226187  | -30.09280355 | 0.00000000 |
| H | 13.40278057  | -25.10920494 | 0.00000000 |
| H | 13.40263527  | 25.10919539  | 0.00000000 |
| H | 13.54211132  | 30.09280297  | 0.00000000 |
| H | 15.09020036  | -24.13974756 | 0.00000000 |
| H | 15.09006144  | 24.13973117  | 0.00000000 |
| H | 15.94329614  | -30.06768244 | 0.00000000 |
| H | 15.94315435  | 30.06768416  | 0.00000000 |
| H | 16.33615311  | -22.07692143 | 0.00000000 |
| H | 16.33601837  | 22.07688883  | 0.00000000 |
| H | 17.59338762  | -19.98128320 | 0.00000000 |
| H | 17.59326220  | 19.98122944  | 0.00000000 |
| H | 18.09234009  | -28.83345655 | 0.00000000 |
| H | 18.09220492  | 28.83345716  | 0.00000000 |
| H | 18.84269338  | -17.88257540 | 0.00000000 |
| H | 18.84258203  | 17.88249638  | 0.00000000 |
| H | 19.32431197  | -26.77236033 | 0.00000000 |
| H | 19.32418724  | 26.77235093  | 0.00000000 |
| H | 20.08453817  | -15.78053126 | 0.00000000 |
| H | 20.08444514  | 15.78042475  | 0.00000000 |
| H | 20.62217218  | -24.66040728 | 0.00000000 |
| H | 20.62205594  | 24.66038430  | 0.00000000 |
| H | 21.31870941  | -13.67453331 | 0.00000000 |
| H | 21.31863698  | 13.67439978  | 0.00000000 |
| H | 21.88939035  | -22.54895720 | 0.00000000 |
| H | 21.88928642  | 22.54891803  | 0.00000000 |
| H | 22.54502280  | -11.56422694 | 0.00000000 |
| H | 22.54497085  | 11.56406925  | 0.00000000 |
| H | 23.14740374  | -20.43570116 | 0.00000000 |
| H | 23.14731648  | 20.43564132  | 0.00000000 |
| H | 23.76334525  | -9.44945624  | 0.00000000 |
| H | 23.76331148  | 9.44927875   | 0.00000000 |
| H | 24.39769639  | -18.31850469 | 0.00000000 |
| H | 24.39762838  | 18.31842034  | 0.00000000 |
| H | 24.97374350  | -7.33001132  | 0.00000000 |
| H | 24.97372423  | 7.32981884   | 0.00000000 |
| H | 25.64056585  | -16.19696768 | 0.00000000 |
| H | 25.64051748  | 16.19685678  | 0.00000000 |
| H | 26.17653302  | -5.20557807  | 0.00000000 |

|   |             |              |            |
|---|-------------|--------------|------------|
| H | 26.17652396 | 5.20537516   | 0.00000000 |
| H | 26.87601761 | -14.07089441 | 0.00000000 |
| H | 26.87598711 | 14.07075733  | 0.00000000 |
| H | 27.37139976 | -3.07538381  | 0.00000000 |
| H | 27.37139675 | 3.07517420   | 0.00000000 |
| H | 28.10389938 | -11.94015402 | 0.00000000 |
| H | 28.10388359 | 11.93999328  | 0.00000000 |
| H | 28.54146777 | -0.97135707  | 0.00000000 |
| H | 28.54146733 | 0.97114421   | 0.00000000 |
| H | 29.32403457 | -9.80445553  | 0.00000000 |
| H | 29.32402965 | 9.80427489   | 0.00000000 |
| H | 30.53628169 | -7.66316217  | 0.00000000 |
| H | 30.53628359 | 7.66296586   | 0.00000000 |
| H | 31.74143813 | -5.51377741  | 0.00000000 |
| H | 31.74144312 | 5.51356981   | 0.00000000 |
| H | 32.93051413 | -3.33562703  | 0.00000000 |
| H | 32.93051928 | 3.33541139   | 0.00000000 |
| H | 34.10601973 | -1.23898767  | 0.00000000 |
| H | 34.10602189 | 1.23876668   | 0.00000000 |

## 15-HGQR (triplet)

|   |              |              |            |
|---|--------------|--------------|------------|
| C | -35.62701384 | -0.68001893  | 0.00000000 |
| C | -35.62701369 | 0.68003071   | 0.00000000 |
| C | -34.42821427 | -2.81515140  | 0.00000000 |
| C | -34.41140375 | -1.42878925  | 0.00000000 |
| C | -34.41140352 | 1.42880078   | 0.00000000 |
| C | -34.42821385 | 2.81516261   | 0.00000000 |
| C | -33.24810737 | -4.97864997  | 0.00000000 |
| C | -33.24826473 | -3.58154659  | 0.00000000 |
| C | -33.15122857 | -0.72553850  | 0.00000000 |
| C | -33.15122848 | 0.72555000   | 0.00000000 |
| C | -33.24826447 | 3.58155739   | 0.00000000 |
| C | -33.24810712 | 4.97866014   | 0.00000000 |
| C | -32.04703924 | -7.12312832  | 0.00000000 |
| C | -32.06019327 | -5.72089351  | 0.00000000 |
| C | -31.98556047 | -2.87871199  | 0.00000000 |
| C | -31.98680649 | -1.47179962  | 0.00000000 |
| C | -31.98680649 | 1.47181079   | 0.00000000 |
| C | -31.98556055 | 2.87872284   | 0.00000000 |
| C | -32.06019341 | 5.72090297   | 0.00000000 |
| C | -32.04703950 | 7.12313689   | 0.00000000 |
| C | -30.83852200 | -9.26115309  | 0.00000000 |
| C | -30.85844444 | -7.85804544  | 0.00000000 |
| C | -30.79354529 | -5.01111017  | 0.00000000 |
| C | -30.79931019 | -3.61272458  | 0.00000000 |
| C | -30.79931065 | 3.61273490   | 0.00000000 |
| C | -30.79354593 | 5.01111979   | 0.00000000 |
| C | -30.85844527 | 7.85805300   | 0.00000000 |
| C | -30.83852307 | 9.26115955   | 0.00000000 |
| C | -29.62240064 | -11.39401211 | 0.00000000 |
| C | -29.64765822 | -9.99180915  | 0.00000000 |
| C | -29.59273612 | -7.14266100  | 0.00000000 |
| C | -29.60305892 | -5.74756663  | 0.00000000 |
| C | -29.60306012 | 5.74757544   | 0.00000000 |
| C | -29.59273761 | 7.14266878   | 0.00000000 |
| C | -29.64765998 | 9.99181443   | 0.00000000 |
| C | -29.62240270 | 11.39401622  | 0.00000000 |
| C | -28.39877847 | -13.52237396 | 0.00000000 |
| C | -28.42859543 | -12.12148483 | 0.00000000 |
| C | -28.38382108 | -9.27139813  | 0.00000000 |
| C | -28.39956892 | -7.87660615  | 0.00000000 |
| C | -28.39957109 | 7.87661288   | 0.00000000 |
| C | -28.38382358 | 9.27140363   | 0.00000000 |
| C | -28.42859819 | 12.12148776  | 0.00000000 |
| C | -28.39878152 | 13.52237582  | 0.00000000 |
| C | -27.16784806 | -15.64648358 | 0.00000000 |
| C | -27.20190500 | -14.24680435 | 0.00000000 |
| C | -27.16726968 | -11.39650884 | 0.00000000 |
| C | -27.18885972 | -10.00090842 | 0.00000000 |
| C | -27.18886291 | 10.00091275  | 0.00000000 |
| C | -27.16727315 | 11.39651193  | 0.00000000 |
| C | -27.20190862 | 14.24680517  | 0.00000000 |
| C | -27.16785188 | 15.64648360  | 0.00000000 |
| C | -25.92986395 | -17.76634614 | 0.00000000 |
| C | -25.96795085 | -16.36781161 | 0.00000000 |
| C | -25.94322747 | -13.51745672 | 0.00000000 |
| C | -25.97055850 | -12.12087452 | 0.00000000 |
| C | -25.97056255 | 12.12087644  | 0.00000000 |
| C | -25.94323168 | 13.51745759  | 0.00000000 |
| C | -25.96795502 | 16.36781082  | 0.00000000 |
| C | -25.92986818 | 17.76634490  | 0.00000000 |
| C | -24.68503864 | -19.88194695 | 0.00000000 |
| C | -24.72690118 | -18.48461602 | 0.00000000 |
| C | -24.71178037 | -15.63414089 | 0.00000000 |

|   |              |              |            |
|---|--------------|--------------|------------|
| C | -24.74463205 | -14.23664538 | 0.00000000 |
| C | -24.74463662 | 14.23664524  | 0.00000000 |
| C | -24.71178496 | 15.63414001  | 0.00000000 |
| C | -24.72690549 | 18.48461422  | 0.00000000 |
| C | -24.68504286 | 19.88194502  | 0.00000000 |
| C | -23.43339832 | -21.99344684 | 0.00000000 |
| C | -23.47887850 | -20.59712789 | 0.00000000 |
| C | -23.47309056 | -17.74667941 | 0.00000000 |
| C | -23.51126809 | -16.34820999 | 0.00000000 |
| C | -23.51127278 | 16.34820835  | 0.00000000 |
| C | -23.47309512 | 17.74667740  | 0.00000000 |
| C | -23.47888256 | 20.59712561  | 0.00000000 |
| C | -23.43340216 | 21.99344466  | 0.00000000 |
| C | -22.17463428 | -24.10129366 | 0.00000000 |
| C | -22.22412428 | -22.70485717 | 0.00000000 |
| C | -22.22754479 | -19.85514842 | 0.00000000 |
| C | -22.27072563 | -18.45559886 | 0.00000000 |
| C | -22.27073005 | 18.45559633  | 0.00000000 |
| C | -22.22754897 | 19.85514582  | 0.00000000 |
| C | -22.22412780 | 22.70485477  | 0.00000000 |
| C | -22.17463749 | 24.10129146  | 0.00000000 |
| C | -20.90799212 | -26.20645320 | 0.00000000 |
| C | -20.96317993 | -24.80699793 | 0.00000000 |
| C | -20.97587043 | -21.95935434 | 0.00000000 |
| C | -21.02323631 | -20.55910740 | 0.00000000 |
| C | -21.02324020 | 20.55910448  | 0.00000000 |
| C | -20.97587401 | 21.95935156  | 0.00000000 |
| C | -20.96318276 | 24.80699556  | 0.00000000 |
| C | -20.90799457 | 26.20645102  | 0.00000000 |
| C | -19.61651463 | -28.30373757 | 0.00000000 |
| C | -19.69507015 | -26.89916798 | 0.00000000 |
| C | -19.71886575 | -24.05867935 | 0.00000000 |
| C | -19.76896489 | -22.65945008 | 0.00000000 |
| C | -19.76896811 | 22.65944709  | 0.00000000 |
| C | -19.71886862 | 24.05867658  | 0.00000000 |
| C | -19.69507227 | 26.89916561  | 0.00000000 |
| C | -19.61651637 | 28.30373527  | 0.00000000 |
| C | -18.36122167 | -30.40466162 | 0.00000000 |
| C | -18.40520189 | -28.97770031 | 0.00000000 |
| C | -18.45816921 | -26.15172618 | 0.00000000 |
| C | -18.50729884 | -24.75732217 | 0.00000000 |
| C | -18.50730140 | 24.75731923  | 0.00000000 |
| C | -18.45817142 | 26.15172344  | 0.00000000 |
| C | -18.40520338 | 28.97769785  | 0.00000000 |
| C | -18.36122304 | 30.40465917  | 0.00000000 |
| C | -17.18179494 | -31.08137209 | 0.00000000 |
| C | -17.16854110 | -28.23345154 | 0.00000000 |
| C | -17.23755462 | -26.85180917 | 0.00000000 |
| C | -17.23755661 | 26.85180630  | 0.00000000 |
| C | -17.16854253 | 28.23344893  | 0.00000000 |
| C | -17.18179625 | 31.08136959  | 0.00000000 |
| C | -15.92784384 | -30.39901609 | 0.00000000 |
| C | -15.90984696 | -28.95567815 | 0.00000000 |
| C | -15.90984813 | 28.95567564  | 0.00000000 |
| C | -15.92784510 | 30.39901363  | 0.00000000 |
| C | -14.73457629 | -31.10440636 | 0.00000000 |
| C | -14.68230863 | -28.31806629 | 0.00000000 |
| C | -14.68230940 | 28.31806415  | 0.00000000 |
| C | -14.73457763 | 31.10440407  | 0.00000000 |
| C | -13.48239568 | -30.46334338 | 0.00000000 |
| C | -13.46175054 | -29.01819753 | 0.00000000 |
| C | -13.46175140 | 29.01819567  | 0.00000000 |
| C | -13.48239685 | 30.46334145  | 0.00000000 |
| C | -12.27220477 | -31.16068904 | 0.00000000 |
| C | -12.23326144 | -28.35670325 | 0.00000000 |
| C | -12.23326209 | 28.35670176  | 0.00000000 |
| C | -12.27220610 | 31.16068734  | 0.00000000 |
| C | -11.03636202 | -30.50188656 | 0.00000000 |
| C | -11.01851573 | -29.04985990 | 0.00000000 |
| C | -11.01851652 | 29.04985869  | 0.00000000 |
| C | -11.03636315 | 30.50188524  | 0.00000000 |
| C | -9.81584735  | -31.19158384 | 0.00000000 |
| C | -9.78519369  | -28.38699577 | 0.00000000 |
| C | -9.78519429  | 28.38699497  | 0.00000000 |
| C | -9.81584867  | 31.19158272  | 0.00000000 |
| C | -8.58543838  | -30.52960409 | 0.00000000 |
| C | -8.57161348  | -29.07559537 | 0.00000000 |
| C | -8.57161426  | 29.07559484  | 0.00000000 |
| C | -8.58543954  | 30.52960341  | 0.00000000 |
| C | -7.36137810  | -31.21495052 | 0.00000000 |
| C | -7.33853108  | -28.41025386 | 0.00000000 |
| C | -7.33853174  | 28.41025378  | 0.00000000 |
| C | -7.36137950  | 31.21494999  | 0.00000000 |

|   |             |              |            |
|---|-------------|--------------|------------|
| C | -6.13293791 | -30.54997097 | 0.00000000 |
| C | -6.12310558 | -29.09507388 | 0.00000000 |
| C | -6.12310653 | 29.09507404  | 0.00000000 |
| C | -6.13293925 | 30.54997091  | 0.00000000 |
| C | -4.90755820 | -31.23130838 | 0.00000000 |
| C | -4.89238794 | -28.42704009 | 0.00000000 |
| C | -4.89238887 | 28.42704073  | 0.00000000 |
| C | -4.90755986 | 31.23130845  | 0.00000000 |
| C | -3.67981433 | -30.56326686 | 0.00000000 |
| C | -3.67393274 | -29.10826161 | 0.00000000 |
| C | -3.67393407 | 29.10826244  | 0.00000000 |
| C | -3.67981603 | 30.56326742  | 0.00000000 |
| C | -2.45381536 | -31.24101456 | 0.00000000 |
| C | -2.44624869 | -28.43716469 | 0.00000000 |
| C | -2.44625012 | 28.43716601  | 0.00000000 |
| C | -2.45381749 | 31.24101522  | 0.00000000 |
| C | -1.22659247 | -30.56982209 | 0.00000000 |
| C | -1.22463517 | -29.11491907 | 0.00000000 |
| C | -1.22463712 | 29.11492052  | 0.00000000 |
| C | -1.22659476 | 30.56982322  | 0.00000000 |
| C | 0.00000959  | -31.24423411 | 0.00000000 |
| C | 0.00000913  | -28.44054527 | 0.00000000 |
| C | 0.00000694  | 28.44054718  | 0.00000000 |
| C | 0.00000680  | 31.24423530  | 0.00000000 |
| C | 1.22661140  | -30.56982167 | 0.00000000 |
| C | 1.22465361  | -29.11491869 | 0.00000000 |
| C | 1.22465087  | 29.11492066  | 0.00000000 |
| C | 1.22660835  | 30.56982330  | 0.00000000 |
| C | 2.45383442  | -31.24101369 | 0.00000000 |
| C | 2.44626679  | -28.43716394 | 0.00000000 |
| C | 2.44626372  | 28.43716632  | 0.00000000 |
| C | 2.45383084  | 31.24101537  | 0.00000000 |
| C | 3.67983297  | -30.56326557 | 0.00000000 |
| C | 3.67395089  | -29.10826044 | 0.00000000 |
| C | 3.67394725  | 29.10826283  | 0.00000000 |
| C | 3.67982910  | 30.56326764  | 0.00000000 |
| C | 4.90757681  | -31.23130659 | 0.00000000 |
| C | 4.89240560  | -28.42703857 | 0.00000000 |
| C | 4.89240160  | 28.42704129  | 0.00000000 |
| C | 4.90757245  | 31.23130870  | 0.00000000 |
| C | 6.13295596  | -30.54996878 | 0.00000000 |
| C | 6.12312313  | -29.09507192 | 0.00000000 |
| C | 6.12311865  | 29.09507459  | 0.00000000 |
| C | 6.13295131  | 30.54997119  | 0.00000000 |
| C | 7.36139594  | -31.21494780 | 0.00000000 |
| C | 7.33854795  | -28.41025157 | 0.00000000 |
| C | 7.33854314  | 28.41025448  | 0.00000000 |
| C | 7.36139091  | 31.21495022  | 0.00000000 |
| C | 8.58545547  | -30.52960098 | 0.00000000 |
| C | 8.57163006  | -29.07559259 | 0.00000000 |
| C | 8.57162492  | 29.07559542  | 0.00000000 |
| C | 8.58545024  | 30.52960362  | 0.00000000 |
| C | 9.81586407  | -31.19158015 | 0.00000000 |
| C | 9.78520938  | -28.38699270 | 0.00000000 |
| C | 9.78520401  | 28.38699565  | 0.00000000 |
| C | 9.81585861  | 31.19158278  | 0.00000000 |
| C | 11.03637778 | -30.50188245 | 0.00000000 |
| C | 11.01853095 | -29.04985626 | 0.00000000 |
| C | 11.01852540 | 29.04985911  | 0.00000000 |
| C | 11.03637220 | 30.50188519  | 0.00000000 |
| C | 12.27222003 | -31.16068424 | 0.00000000 |
| C | 12.23327554 | -28.35669934 | 0.00000000 |
| C | 12.23326989 | 28.35670222  | 0.00000000 |
| C | 12.27221439 | 31.16068695  | 0.00000000 |
| C | 13.48240967 | -30.46333805 | 0.00000000 |
| C | 13.46176390 | -29.01819287 | 0.00000000 |
| C | 13.46175824 | 29.01819567  | 0.00000000 |
| C | 13.48240400 | 30.46334082  | 0.00000000 |
| C | 14.73458970 | -31.10440005 | 0.00000000 |
| C | 14.68232055 | -28.31806133 | 0.00000000 |
| C | 14.68231493 | 28.31806407  | 0.00000000 |
| C | 14.73458410 | 31.10440278  | 0.00000000 |
| C | 15.92785565 | -30.39900944 | 0.00000000 |
| C | 15.90985766 | -28.95567242 | 0.00000000 |
| C | 15.90985226 | 28.95567509  | 0.00000000 |
| C | 15.92785017 | 30.39901219  | 0.00000000 |
| C | 17.18180593 | -31.08136476 | 0.00000000 |
| C | 17.16855058 | -28.23344599 | 0.00000000 |
| C | 17.23756298 | -26.85180578 | 0.00000000 |
| C | 17.23755806 | 26.85180797  | 0.00000000 |
| C | 17.16854539 | 28.23344858  | 0.00000000 |
| C | 17.18180055 | 31.08136759  | 0.00000000 |
| C | 18.36123093 | -30.40465453 | 0.00000000 |

|   |             |              |            |
|---|-------------|--------------|------------|
| C | 18.40521012 | -28.97769444 | 0.00000000 |
| C | 18.45817621 | -26.15172462 | 0.00000000 |
| C | 18.50730488 | -24.75732345 | 0.00000000 |
| C | 18.50730037 | 24.75732474  | 0.00000000 |
| C | 18.45817152 | 26.15172645  | 0.00000000 |
| C | 18.40520514 | 28.97769709  | 0.00000000 |
| C | 18.36122582 | 30.40465734  | 0.00000000 |
| C | 19.61652094 | -28.30373295 | 0.00000000 |
| C | 19.69507575 | -26.89916549 | 0.00000000 |
| C | 19.71886976 | -24.05868308 | 0.00000000 |
| C | 19.76896754 | -22.65945719 | 0.00000000 |
| C | 19.76896367 | 22.65945727  | 0.00000000 |
| C | 19.71886565 | 24.05868387  | 0.00000000 |
| C | 19.69507129 | 26.89916751  | 0.00000000 |
| C | 19.61651631 | 28.30373537  | 0.00000000 |
| C | 20.90799569 | -26.20645286 | 0.00000000 |
| C | 20.96318222 | -24.80700054 | 0.00000000 |
| C | 20.97587055 | -21.95936446 | 0.00000000 |
| C | 21.02323487 | -20.55912120 | 0.00000000 |
| C | 21.02323179 | 20.55911981  | 0.00000000 |
| C | 20.97586722 | 21.95936389  | 0.00000000 |
| C | 20.96317845 | 24.80700155  | 0.00000000 |
| C | 20.90799165 | 26.20645449  | 0.00000000 |
| C | 22.17463411 | -24.10129885 | 0.00000000 |
| C | 22.22412247 | -22.70486604 | 0.00000000 |
| C | 22.22754065 | -19.85516532 | 0.00000000 |
| C | 22.27071987 | -18.45561921 | 0.00000000 |
| C | 22.27071766 | 18.45561627  | 0.00000000 |
| C | 22.22753818 | 19.85516322  | 0.00000000 |
| C | 22.22411955 | 22.70486570  | 0.00000000 |
| C | 22.17463088 | 24.10129932  | 0.00000000 |
| C | 23.43339390 | -21.99345865 | 0.00000000 |
| C | 23.47887248 | -20.59714357 | 0.00000000 |
| C | 23.47308240 | -17.74670239 | 0.00000000 |
| C | 23.51125852 | -16.34823559 | 0.00000000 |
| C | 23.51125710 | 16.34823125  | 0.00000000 |
| C | 23.47308078 | 17.74669880  | 0.00000000 |
| C | 23.47887046 | 20.59714171  | 0.00000000 |
| C | 23.43339159 | 21.99345767  | 0.00000000 |
| C | 24.68503027 | -19.88196554 | 0.00000000 |
| C | 24.72689151 | -18.48463800 | 0.00000000 |
| C | 24.71176909 | -15.63416817 | 0.00000000 |
| C | 24.74461978 | -14.23667399 | 0.00000000 |
| C | 24.74461897 | 14.23666859  | 0.00000000 |
| C | 24.71176818 | 15.63416334  | 0.00000000 |
| C | 24.72689033 | 18.48463463  | 0.00000000 |
| C | 24.68502885 | 19.88196301  | 0.00000000 |
| C | 25.92985259 | -17.76637048 | 0.00000000 |
| C | 25.96793869 | -16.36783828 | 0.00000000 |
| C | 25.94321445 | -13.51748587 | 0.00000000 |
| C | 25.97054502 | -12.12090354 | 0.00000000 |
| C | 25.97054463 | 12.12089749  | 0.00000000 |
| C | 25.94321403 | 13.51748018  | 0.00000000 |
| C | 25.96793817 | 16.36783365  | 0.00000000 |
| C | 25.92985193 | 17.76636653  | 0.00000000 |
| C | 27.16783516 | -15.64651165 | 0.00000000 |
| C | 27.20189187 | -14.24683334 | 0.00000000 |
| C | 27.16725647 | -11.39653729 | 0.00000000 |
| C | 27.18884661 | -10.00093545 | 0.00000000 |
| C | 27.18884643 | 10.00092912  | 0.00000000 |
| C | 27.16725634 | 11.39653114  | 0.00000000 |
| C | 27.20189177 | 14.24682781  | 0.00000000 |
| C | 27.16783504 | 15.64650659  | 0.00000000 |
| C | 28.39876562 | -13.52240321 | 0.00000000 |
| C | 28.42858284 | -12.12151358 | 0.00000000 |
| C | 28.38380910 | -9.27142376  | 0.00000000 |
| C | 28.39955749 | -7.87662948  | 0.00000000 |
| C | 28.39955738 | 7.87662317   | 0.00000000 |
| C | 28.38380908 | 9.27141749   | 0.00000000 |
| C | 28.42858294 | 12.12150755  | 0.00000000 |
| C | 28.39876579 | 13.52239744  | 0.00000000 |
| C | 29.62238920 | -11.39404005 | 0.00000000 |
| C | 29.64764738 | -9.99183545  | 0.00000000 |
| C | 29.59272638 | -7.14268255  | 0.00000000 |
| C | 29.60305001 | -5.74758554  | 0.00000000 |
| C | 29.60304991 | 5.74757938   | 0.00000000 |
| C | 29.59272637 | 7.14267636   | 0.00000000 |
| C | 29.64764752 | 9.99182926   | 0.00000000 |
| C | 29.62238945 | 11.39403396  | 0.00000000 |
| C | 30.83851289 | -9.26117784  | 0.00000000 |
| C | 30.85843610 | -7.85806789  | 0.00000000 |
| C | 30.79353832 | -5.01112728  | 0.00000000 |
| C | 30.79930414 | -3.61273918  | 0.00000000 |

|   |              |              |            |
|---|--------------|--------------|------------|
| C | 30.79930407  | 3.61273321   | 0.00000000 |
| C | 30.79353829  | 5.01112125   | 0.00000000 |
| C | 30.85843618  | 7.85806176   | 0.00000000 |
| C | 30.83851309  | 9.26117172   | 0.00000000 |
| C | 32.04703282  | -7.12314898  | 0.00000000 |
| C | 32.06018774  | -5.72091168  | 0.00000000 |
| C | 31.98555657  | -2.87872508  | 0.00000000 |
| C | 31.98680378  | -1.47181047  | 0.00000000 |
| C | 31.98680376  | 1.47180465   | 0.00000000 |
| C | 31.98555654  | 2.87871923   | 0.00000000 |
| C | 32.06018775  | 5.72090572   | 0.00000000 |
| C | 32.04703292  | 7.12314298   | 0.00000000 |
| C | 33.24810374  | -4.97866668  | 0.00000000 |
| C | 33.24826223  | -3.58156089  | 0.00000000 |
| C | 33.15122797  | -0.72554790  | 0.00000000 |
| C | 33.15122796  | 0.72554215   | 0.00000000 |
| C | 33.24826220  | 3.58155509   | 0.00000000 |
| C | 33.24810376  | 4.97866084   | 0.00000000 |
| C | 34.42821378  | -2.81516487  | 0.00000000 |
| C | 34.41140411  | -1.42880032  | 0.00000000 |
| C | 34.41140408  | 1.42879462   | 0.00000000 |
| C | 34.42821376  | 2.81515916   | 0.00000000 |
| C | 35.62701544  | -0.68002871  | 0.00000000 |
| C | 35.62701543  | 0.68002308   | 0.00000000 |
| H | -36.57295561 | -1.23899918  | 0.00000000 |
| H | -36.57295538 | 1.23901097   | 0.00000000 |
| H | -35.39782372 | -3.33511114  | 0.00000000 |
| H | -35.39782317 | 3.33512225   | 0.00000000 |
| H | -34.20963026 | -5.51314359  | 0.00000000 |
| H | -34.20962980 | 5.51315357   | 0.00000000 |
| H | -33.00577926 | -7.66265664  | 0.00000000 |
| H | -33.00577918 | 7.66266501   | 0.00000000 |
| H | -31.79521448 | -9.80436249  | 0.00000000 |
| H | -31.79521509 | 9.80436878   | 0.00000000 |
| H | -31.00837484 | -0.97161072  | 0.00000000 |
| H | -31.00837507 | 0.97162158   | 0.00000000 |
| H | -30.57710236 | -11.94076493 | 0.00000000 |
| H | -30.57710390 | 11.94076897  | 0.00000000 |
| H | -29.83864389 | -3.07645376  | 0.00000000 |
| H | -29.83864469 | 3.07646393   | 0.00000000 |
| H | -29.35154913 | -14.07252028 | 0.00000000 |
| H | -29.35155166 | 14.07252219  | 0.00000000 |
| H | -28.64459063 | -5.20760705  | 0.00000000 |
| H | -28.64459228 | 5.20761582   | 0.00000000 |
| H | -28.11873174 | -16.19989663 | 0.00000000 |
| H | -28.11873510 | 16.19989681  | 0.00000000 |
| H | -27.44299974 | -7.33325577  | 0.00000000 |
| H | -27.44300240 | 7.33326258   | 0.00000000 |
| H | -26.87888450 | -18.32293525 | 0.00000000 |
| H | -26.87888837 | 18.32293425  | 0.00000000 |
| H | -26.23417366 | -9.45420822  | 0.00000000 |
| H | -26.23417733 | 9.45421268   | 0.00000000 |
| H | -25.63219926 | -20.44165907 | 0.00000000 |
| H | -25.63220324 | 20.44165743  | 0.00000000 |
| H | -25.01778481 | -11.57081356 | 0.00000000 |
| H | -25.01778926 | 11.57081565  | 0.00000000 |
| H | -24.37868999 | -22.55625727 | 0.00000000 |
| H | -24.37869369 | 22.55625538  | 0.00000000 |
| H | -23.79377355 | -13.68326774 | 0.00000000 |
| H | -23.79377841 | 13.68326774  | 0.00000000 |
| H | -23.11805777 | -24.66717127 | 0.00000000 |
| H | -23.11806089 | 24.66716933  | 0.00000000 |
| H | -22.56229988 | -15.79160744 | 0.00000000 |
| H | -22.56230475 | 15.79160585  | 0.00000000 |
| H | -21.84882582 | -26.77657023 | 0.00000000 |
| H | -21.84882819 | 26.77656829  | 0.00000000 |
| H | -21.32359426 | -17.89590846 | 0.00000000 |
| H | -21.32359880 | 17.89590585  | 0.00000000 |
| H | -20.54956091 | -28.88679621 | 0.00000000 |
| H | -20.54956259 | 28.88679408  | 0.00000000 |
| H | -20.07785476 | -19.99651080 | 0.00000000 |
| H | -20.07785872 | 19.99650769  | 0.00000000 |
| H | -19.31702002 | -30.94657575 | 0.00000000 |
| H | -19.31702139 | 30.94657332  | 0.00000000 |
| H | -18.82527116 | -22.09405634 | 0.00000000 |
| H | -18.82527447 | 22.09405309  | 0.00000000 |
| H | -17.56534740 | -24.18883734 | 0.00000000 |
| H | -17.56535006 | 24.18883411  | 0.00000000 |
| H | -17.16716273 | -32.18000182 | 0.00000000 |
| H | -17.16716405 | 32.17999930  | 0.00000000 |
| H | -16.31724557 | -26.25127770 | 0.00000000 |
| H | -16.31724787 | 26.25127437  | 0.00000000 |
| H | -14.76696899 | -32.20415275 | 0.00000000 |

|   |              |              |            |
|---|--------------|--------------|------------|
| H | -14.62845850 | -27.22052175 | 0.00000000 |
| H | -14.62845882 | 27.22051966  | 0.00000000 |
| H | -14.76697057 | 32.20415041  | 0.00000000 |
| H | -12.28934266 | -32.26062809 | 0.00000000 |
| H | -12.21804685 | -27.25662260 | 0.00000000 |
| H | -12.21804725 | 27.25662115  | 0.00000000 |
| H | -12.28934434 | 32.26062630  | 0.00000000 |
| H | -9.82816957  | -32.29161377 | 0.00000000 |
| H | -9.77340615  | -27.28697421 | 0.00000000 |
| H | -9.77340649  | 27.28697349  | 0.00000000 |
| H | -9.82817124  | 32.29161254  | 0.00000000 |
| H | -7.37044860  | -32.31504005 | 0.00000000 |
| H | -7.32966909  | -27.31019008 | 0.00000000 |
| H | -7.32966949  | 27.31019011  | 0.00000000 |
| H | -7.37045035  | 32.31503938  | 0.00000000 |
| H | -4.91350772  | -32.33144462 | 0.00000000 |
| H | -4.88642216  | -27.32693398 | 0.00000000 |
| H | -4.88642282  | 27.32693476  | 0.00000000 |
| H | -4.91350970  | 32.33144452  | 0.00000000 |
| H | -2.45675849  | -32.34118041 | 0.00000000 |
| H | -2.44324890  | -27.33702989 | 0.00000000 |
| H | -2.44325007  | 27.33703138  | 0.00000000 |
| H | -2.45676090  | 32.34118088  | 0.00000000 |
| H | 0.00000972   | -32.34440986 | 0.00000000 |
| H | 0.00000893   | -27.34040066 | 0.00000000 |
| H | 0.00000696   | 27.34040276  | 0.00000000 |
| H | 0.00000673   | 32.34441086  | 0.00000000 |
| H | 2.45677786   | -32.34117946 | 0.00000000 |
| H | 2.44326655   | -27.33702922 | 0.00000000 |
| H | 2.44326369   | 27.33703178  | 0.00000000 |
| H | 2.45677411   | 32.34118097  | 0.00000000 |
| H | 4.91352665   | -32.33144268 | 0.00000000 |
| H | 4.88643933   | -27.32693264 | 0.00000000 |
| H | 4.88643551   | 27.32693551  | 0.00000000 |
| H | 4.91352217   | 32.33144463  | 0.00000000 |
| H | 7.37046677   | -32.31503710 | 0.00000000 |
| H | 7.32968544   | -27.31018808 | 0.00000000 |
| H | 7.32968077   | 27.31019110  | 0.00000000 |
| H | 7.37046169   | 32.31503941  | 0.00000000 |
| H | 9.82818664   | -32.29160977 | 0.00000000 |
| H | 9.77342129   | -27.28697154 | 0.00000000 |
| H | 9.77341599   | 27.28697456  | 0.00000000 |
| H | 9.82818119   | 32.29161233  | 0.00000000 |
| H | 12.28935838  | -32.26062291 | 0.00000000 |
| H | 12.21806030  | -27.25661924 | 0.00000000 |
| H | 12.21805469  | 27.25662213  | 0.00000000 |
| H | 12.28935279  | 32.26062559  | 0.00000000 |
| H | 14.76698292  | -32.20414599 | 0.00000000 |
| H | 14.62846988  | -27.22051755 | 0.00000000 |
| H | 14.62846417  | 27.22052026  | 0.00000000 |
| H | 14.76697734  | 32.20414872  | 0.00000000 |
| H | 16.31725423  | -26.25127548 | 0.00000000 |
| H | 16.31724936  | 26.25127745  | 0.00000000 |
| H | 17.16717392  | -32.17999397 | 0.00000000 |
| H | 17.16716850  | 32.17999683  | 0.00000000 |
| H | 17.56535425  | -24.18883956 | 0.00000000 |
| H | 17.56534964  | 24.18884072  | 0.00000000 |
| H | 18.82527488  | -22.09406439 | 0.00000000 |
| H | 18.82527085  | 22.09406434  | 0.00000000 |
| H | 19.31702884  | -30.94656802 | 0.00000000 |
| H | 19.31702379  | 30.94657087  | 0.00000000 |
| H | 20.07785456  | -19.99652536 | 0.00000000 |
| H | 20.07785128  | 19.99652383  | 0.00000000 |
| H | 20.54956628  | -28.88679138 | 0.00000000 |
| H | 20.54956178  | 28.88679380  | 0.00000000 |
| H | 21.32358976  | -17.89592926 | 0.00000000 |
| H | 21.32358732  | 17.89592619  | 0.00000000 |
| H | 21.84882817  | -26.77656959 | 0.00000000 |
| H | 21.84882430  | 26.77657128  | 0.00000000 |
| H | 22.56229136  | -15.79163312 | 0.00000000 |
| H | 22.56228970  | 15.79162867  | 0.00000000 |
| H | 23.11805634  | -24.66717582 | 0.00000000 |
| H | 23.11805331  | 24.66717637  | 0.00000000 |
| H | 23.79376195  | -13.68329608 | 0.00000000 |
| H | 23.79376093  | 13.68329058  | 0.00000000 |
| H | 24.37868438  | -22.55626821 | 0.00000000 |
| H | 24.37868229  | 22.55626734  | 0.00000000 |
| H | 25.01777153  | -11.57084203 | 0.00000000 |
| H | 25.01777096  | 11.57083589  | 0.00000000 |
| H | 25.63218994  | -20.44167665 | 0.00000000 |
| H | 25.63218877  | 20.44167424  | 0.00000000 |
| H | 26.23416029  | -9.45423452  | 0.00000000 |
| H | 26.23415996  | 9.45422814   | 0.00000000 |

|   |             |              |            |
|---|-------------|--------------|------------|
| H | 26.87887260 | -18.32295859 | 0.00000000 |
| H | 26.87887218 | 18.32295475  | 0.00000000 |
| H | 27.44298766 | -7.33327834  | 0.00000000 |
| H | 27.44298743 | 7.33327200   | 0.00000000 |
| H | 28.11871879 | -16.19992388 | 0.00000000 |
| H | 28.11871888 | 16.19991892  | 0.00000000 |
| H | 28.64458085 | -5.20762522  | 0.00000000 |
| H | 28.64458066 | 5.20761905   | 0.00000000 |
| H | 29.35153669 | -14.07254902 | 0.00000000 |
| H | 29.35153702 | 14.07254334  | 0.00000000 |
| H | 29.83863690 | -3.07646757  | 0.00000000 |
| H | 29.83863678 | 3.07646159   | 0.00000000 |
| H | 30.57709166 | -11.94079274 | 0.00000000 |
| H | 30.57709203 | 11.94078674  | 0.00000000 |
| H | 31.00837120 | -0.97162065  | 0.00000000 |
| H | 31.00837115 | 0.97161486   | 0.00000000 |
| H | 31.79520625 | -9.80438749  | 0.00000000 |
| H | 31.79520652 | 9.80438146   | 0.00000000 |
| H | 33.00577369 | -7.66267790  | 0.00000000 |
| H | 33.00577383 | 7.66267199   | 0.00000000 |
| H | 34.20962727 | -5.51316124  | 0.00000000 |
| H | 34.20962730 | 5.51315549   | 0.00000000 |
| H | 35.39782378 | -3.33512556  | 0.00000000 |
| H | 35.39782378 | 3.33511990   | 0.00000000 |
| H | 36.57295811 | -1.23900917  | 0.00000000 |
| H | 36.57295808 | 1.23900359   | 0.00000000 |

## FIGURES

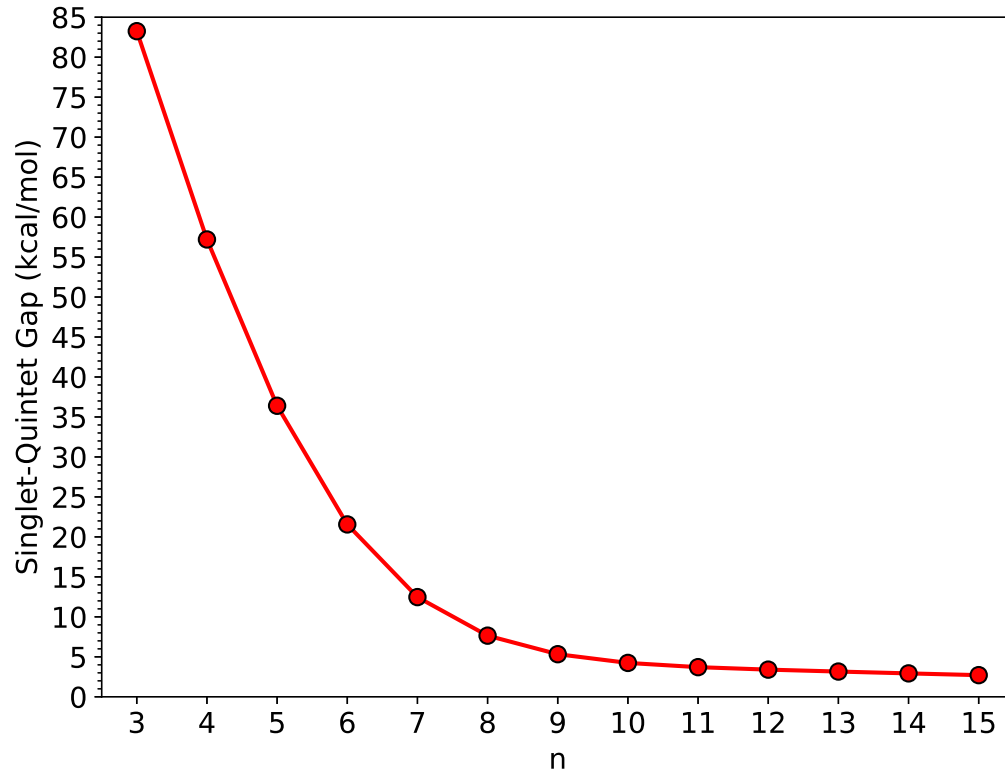FIG. S1. Singlet-quintet gap of  $n$ -HGQR, calculated by spin-unrestricted TAO-LDA.

## TABLES

TABLE S1. Singlet-triplet gap  $E_{\text{ST}}$  (in kcal/mol) of  $n$ -HGQR, calculated by spin-unrestricted KS-LDA and TAO-LDA.

| $n$ | KS-LDA | TAO-LDA |
|-----|--------|---------|
| 3   | 51.14  | 36.03   |
| 4   | 40.03  | 23.10   |
| 5   | 31.33  | 13.18   |
| 6   | 12.63  | 6.74    |
| 7   | 15.27  | 3.42    |
| 8   | 10.34  | 1.96    |
| 9   | 6.51   | 1.33    |
| 10  | 3.30   | 1.05    |
| 11  | 0.90   | 0.91    |
| 12  | 1.12   | 0.84    |
| 13  | 2.03   | 0.78    |
| 14  | 2.38   | 0.73    |
| 15  |        | 0.68    |

TABLE S2. Vertical ionization potential  $\text{IP}_v$  (in eV), vertical electron affinity  $\text{EA}_v$  (in eV), fundamental gap  $E_g$  (in eV), and symmetrized von Neumann entropy  $S_{\text{vN}}$  of ground-state  $n$ -HGQR, calculated by spin-unrestricted TAO-LDA.

| $n$ | $\text{IP}_v$ | $\text{EA}_v$ | $E_g$ | $S_{\text{vN}}$ |
|-----|---------------|---------------|-------|-----------------|
| 3   | 5.95          | 1.62          | 4.33  | 0.09            |
| 4   | 5.40          | 2.22          | 3.18  | 0.33            |
| 5   | 5.01          | 2.64          | 2.37  | 0.95            |
| 6   | 4.74          | 2.91          | 1.83  | 2.14            |
| 7   | 5.58          | 3.09          | 1.49  | 3.79            |
| 8   | 4.48          | 3.19          | 1.29  | 5.59            |
| 9   | 4.41          | 3.27          | 1.15  | 7.18            |
| 10  | 4.36          | 3.32          | 1.04  | 8.47            |
| 11  | 4.32          | 3.36          | 0.96  | 9.54            |
| 12  | 4.29          | 3.40          | 0.89  | 10.54           |
| 13  | 4.26          | 3.43          | 0.83  | 11.55           |
| 14  | 4.23          | 3.45          | 0.78  | 12.62           |
| 15  | 4.21          | 3.48          | 0.73  | 13.74           |
